# Supplementary material for: Isolation of a triplet benzene dianion
Source: Springer Nature journal article supplement (doi:10.1038/s41557-021-00737-8), 2021-07-19
Supplement: 41557_2021_737_MOESM10_ESM.cif [file 41557_2021_737_MOESM10_ESM.cif]

data_cg4060p2
_audit_creation_date               2019-11-25
_audit_creation_method
;
Olex2 1.2
(compiled 2018.05.29 svn.r3508 for OlexSys, GUI svn.r5506)
;
_shelx_SHELXL_version_number       '2016/6'
_audit_contact_author_address      ?
_audit_contact_author_email        ?
_audit_contact_author_name         ''
_audit_contact_author_phone        ?
_publ_contact_author_id_orcid      ?
_publ_section_references
;
Dolomanov, O.V., Bourhis, L.J., Gildea, R.J, Howard, J.A.K. & Puschmann, H.
 (2009), J. Appl. Cryst. 42, 339-341.

Sheldrick, G.M. (2015). Acta Cryst. C71, 3-8.
;
_chemical_name_common              ?
_chemical_name_systematic          ?
_chemical_formula_moiety           'C112 H146 K N6 O7 Y2, C20 H40 K O8, C4 H8 O'
_chemical_formula_sum              'C136 H194 K2 N6 O16 Y2'
_chemical_formula_weight           2424.98
_chemical_melting_point            ?
_chemical_oxdiff_formula           'Y C H N O K'
loop_
  _atom_type_symbol
  _atom_type_description
  _atom_type_scat_dispersion_real
  _atom_type_scat_dispersion_imag
  _atom_type_scat_source
 'C' 'C' 0.0033 0.0016 'International Tables Vol C Tables 4.2.6.8 and 6.1.1.4'
 'H' 'H' 0.0000 0.0000 'International Tables Vol C Tables 4.2.6.8 and 6.1.1.4'
 'K' 'K' 0.2009 0.2494 'International Tables Vol C Tables 4.2.6.8 and 6.1.1.4'
 'N' 'N' 0.0061 0.0033 'International Tables Vol C Tables 4.2.6.8 and 6.1.1.4'
 'O' 'O' 0.0106 0.0060 'International Tables Vol C Tables 4.2.6.8 and 6.1.1.4'
 'Y' 'Y' -2.7962 3.5667 'International Tables Vol C Tables 4.2.6.8 and 6.1.1.4'

_shelx_space_group_comment
;
The symmetry employed for this shelxl refinement is uniquely defined
by the following loop, which should always be used as a source of
symmetry information in preference to the above space-group names.
They are only intended as comments.
;
_space_group_crystal_system        'monoclinic'
_space_group_IT_number             14
_space_group_name_H-M_alt          'P 1 21/c 1'
_space_group_name_Hall             '-P 2ybc'
loop_
  _space_group_symop_operation_xyz
 'x, y, z'
 '-x, y+1/2, -z+1/2'
 '-x, -y, -z'
 'x, -y-1/2, z-1/2'

_cell_length_a                     18.7690(7)
_cell_length_b                     28.9313(11)
_cell_length_c                     24.4716(8)
_cell_angle_alpha                  90
_cell_angle_beta                   97.056(3)
_cell_angle_gamma                  90
_cell_volume                       13187.7(8)
_cell_formula_units_Z              4
_cell_measurement_reflns_used      20244
_cell_measurement_temperature      100(2)
_cell_measurement_theta_max        29.1600
_cell_measurement_theta_min        3.0590
_shelx_estimated_absorpt_T_max     ?
_shelx_estimated_absorpt_T_min     ?
_exptl_absorpt_coefficient_mu      1.002
_exptl_absorpt_correction_T_max    1.00000
_exptl_absorpt_correction_T_min    0.74716
_exptl_absorpt_correction_type     multi-scan
_exptl_absorpt_process_details
;
CrysAlisPro 1.171.39.46e (Rigaku Oxford Diffraction, 2018)
Empirical absorption correction using spherical harmonics,
 implemented in SCALE3 ABSPACK scaling algorithm.
;
_exptl_absorpt_special_details     ?
_exptl_crystal_colour              blue-black
_exptl_crystal_density_diffrn      1.221
_exptl_crystal_density_meas        ?
_exptl_crystal_density_method      ?
_exptl_crystal_description         block
_exptl_crystal_F_000               5184
_exptl_crystal_size_max            0.57
_exptl_crystal_size_mid            0.20
_exptl_crystal_size_min            0.14
_exptl_special_details
;
Single crystals were coated in Paratone-N-oil and mounted on a Kapton loop. 
Data was collected using using a Rigaku XtaLAB p200 equipped with a MicroMax-007
HF microfocus rotating anode and a Pilatus 200K hybrid pixel array detector
at 100 K umder a N2 cryostream using MoKa radiation (lamda = 0.71073 angstroms).
;
_exptl_transmission_factor_max     ?
_exptl_transmission_factor_min     ?
_diffrn_reflns_av_R_equivalents    0.0990
_diffrn_reflns_av_unetI/netI       0.0599
_diffrn_reflns_Laue_measured_fraction_full  0.998
_diffrn_reflns_Laue_measured_fraction_max  0.998
_diffrn_reflns_limit_h_max         22
_diffrn_reflns_limit_h_min         -20
_diffrn_reflns_limit_k_max         34
_diffrn_reflns_limit_k_min         -34
_diffrn_reflns_limit_l_max         29
_diffrn_reflns_limit_l_min         -29
_diffrn_reflns_number              142181
_diffrn_reflns_point_group_measured_fraction_full  0.998
_diffrn_reflns_point_group_measured_fraction_max  0.998
_diffrn_reflns_theta_full          25.242
_diffrn_reflns_theta_max           25.350
_diffrn_reflns_theta_min           2.816
_diffrn_ambient_temperature        100(2)
_diffrn_detector                   'CCD plate'
_diffrn_detector_area_resol_mean   ?
_diffrn_detector_type              'Pilatus 200K'
_diffrn_measured_fraction_theta_full  0.998
_diffrn_measured_fraction_theta_max  0.998
_diffrn_measurement_details
;
List of Runs (angles in degrees, time in seconds):

  # Type    Start    End  Width  t~exp~   \w     \q     \k     \f   Frames
--------------------------------------------------------------------------
  1  \w     -4.00  21.00   0.50   20.00    --   -1.86 -77.00  60.00   50
  2  \w    -15.00  30.00   0.50   20.00    --   -1.86 -99.00 120.00   90
  3  \w    -15.00  36.00   0.50   20.00    --    2.17 -99.00  60.00  102
  4  \w     -1.00  25.00   0.50   20.00    --    2.17-102.00 -73.00   52
  5  \w    -11.00  32.00   0.50   20.00    --   -1.86 -99.00-120.00   86
  6  \w    -13.00  12.00   0.50   20.00    --    2.17 -99.00-150.00   50
  7  \w    -16.00  44.00   0.50   20.00    --    2.17  77.00-180.00  120
  8  \w    -20.00  45.00   0.50   20.00    --    2.17  77.00 120.00  130
;
_diffrn_measurement_device         'four-circle diffractometer'
_diffrn_measurement_device_type    'ROD, Synergy Custom DW system, Pilatus 200K'
_diffrn_measurement_method         '\w scans'
_diffrn_orient_matrix_type        
 'CrysAlisPro convention (1999,Acta A55,543-557)'
_diffrn_orient_matrix_UB_11        -0.0035704000
_diffrn_orient_matrix_UB_12        -0.0217589000
_diffrn_orient_matrix_UB_13        0.0127413000
_diffrn_orient_matrix_UB_21        0.0179713000
_diffrn_orient_matrix_UB_22        0.0088212000
_diffrn_orient_matrix_UB_23        0.0250308000
_diffrn_orient_matrix_UB_31        -0.0333776000
_diffrn_orient_matrix_UB_32        0.0070797000
_diffrn_orient_matrix_UB_33        0.0079972000
_diffrn_radiation_monochromator    mirror
_diffrn_radiation_probe            x-ray
_diffrn_radiation_type             MoK\a
_diffrn_radiation_wavelength       0.71073
_diffrn_source                     'Rotating-anode X-ray tube'
_diffrn_source_type                'Rigaku (Mo) X-ray Source'
_reflns_Friedel_coverage           0.000
_reflns_Friedel_fraction_full      .
_reflns_Friedel_fraction_max       .
_reflns_number_gt                  17084
_reflns_number_total               24118
_reflns_odcompleteness_completeness  99.80
_reflns_odcompleteness_iscentric   1
_reflns_odcompleteness_theta       25.30
_reflns_special_details
;
 Reflections were merged by SHELXL according to the crystal
 class for the calculation of statistics and refinement.
 
 _reflns_Friedel_fraction is defined as the number of unique
 Friedel pairs measured divided by the number that would be
 possible theoretically, ignoring centric projections and
 systematic absences.
;
_reflns_threshold_expression       'I > 2\s(I)'
_computing_cell_refinement         'CrysAlisPro 1.171.39.46e (Rigaku OD, 2018)'
_computing_data_collection         'CrysAlisPro 1.171.39.46e (Rigaku OD, 2018)'
_computing_data_reduction          'CrysAlisPro 1.171.39.46e (Rigaku OD, 2018)'
_computing_molecular_graphics      'Olex2 (Dolomanov et al., 2009)'
_computing_publication_material    'Olex2 (Dolomanov et al., 2009)'
_computing_structure_refinement    'ShelXL (Sheldrick, 2015)'
_computing_structure_solution      'ShelXT (Sheldrick, 2015)'
_refine_diff_density_max           0.892
_refine_diff_density_min           -0.606
_refine_diff_density_rms           0.069
_refine_ls_extinction_coef         .
_refine_ls_extinction_method       none
_refine_ls_goodness_of_fit_ref     1.023
_refine_ls_hydrogen_treatment      constr
_refine_ls_matrix_type             full
_refine_ls_number_parameters       1871
_refine_ls_number_reflns           24118
_refine_ls_number_restraints       1175
_refine_ls_R_factor_all            0.0908
_refine_ls_R_factor_gt             0.0571
_refine_ls_restrained_S_all        1.064
_refine_ls_shift/su_max            0.002
_refine_ls_shift/su_mean           0.000
_refine_ls_structure_factor_coef   Fsqd
_refine_ls_weighting_details      
 'w=1/[\s^2^(Fo^2^)+(0.0739P)^2^+18.1372P] where P=(Fo^2^+2Fc^2^)/3'
_refine_ls_weighting_scheme        calc
_refine_ls_wR_factor_gt            0.1409
_refine_ls_wR_factor_ref           0.1598
_refine_special_details
;
The compound crystallized in the space group P21/c with one molecule in the
asymmetric unit. Significant positional disorder was observed for the
18-crown-6 and tetrahydrofuran molecules in the two [K(18-crown-6)(THF)2]+
countercations. Disordered 18-crown-6 and tetrahydrofuran molecules were
modeled over two positions and the refinement was stabilized through application
of C-C and C-O bond distance restraints, as well as enhanced rigid bond restraints.
C-C-O bond angles in tetrahydrofuran molecules were also restrained, as necessary.
Several of the carbon and oxygen atoms in these disordered components could not
be stabilized in the refinement unless identical anisotropic displacement parameters
were used, which were determined by analogous atoms in the 18-crown-6 or tetrahydrofuran
molecule. Positional disorder was also observed for the tert-butyl groups in the BzN6-Mes
ligand. This disorder was modeled over two positions and the refinement was stabilized
through application of C-CH3 and CH3-CH3 distance restraints, as well as enhanced rigid
bond restraints. All non-H atoms were refined anisotropically. One reflection (2 2 1)
was omitted, as it was affected by the beamstop. In addition, a number of FCF reflections
below theta min were likely obscured by the beamstop mask and, as a result, are missing.
These missing reflections could also be due to the large unit cell in 2-Y.
;
_olex2_refinement_description
;
1. Fixed Uiso
 At 1.2 times of:
  All C(H) groups, All C(H,H) groups
 At 1.5 times of:
  All C(H,H,H) groups
2. Restrained distances
 C16-C14 \\sim C126-C125 \\sim C1E-C1A \\sim C124-C123 \\sim C15-C1C \\sim
C122-C121 \\sim C1G-C1F ~
 C1H-C1I \\sim C117-C118 \\sim C1D-C1B \\sim C128-C127
 with sigma of 0.02
 O14A-C127 \\sim O14B-C1D \\sim O14B-C14 \\sim O14A-C126 \\sim O13A-C125 \\sim
O13B-C16 \\sim O12A-C1A
 \\sim O12B-C123 \\sim O12B-C122 \\sim O12A-C1C \\sim O11B-C1G \\sim O11A-C15
\\sim O11A-C120 \\sim O11B-
 C121 \\sim O10B-C1F \\sim O10A-C119 \\sim O10B-C1H \\sim O10A-C118 \\sim
O9B-C1I \\sim O9A-C117 \\sim O9A-
 C128 \\sim O9B-C1B
 with sigma of 0.02
 C112-C111 \\sim C110-C111 \\sim C109-C110 \\sim C1M-C1L \\sim C1L-C1K \\sim
C1K-C1J
 with sigma of 0.02
 O7A-C1J \\sim O7A-C1M \\sim O7B-C109 \\sim O7B-C112
 with sigma of 0.02
 C1M-C1K \\sim C1J-C1L \\sim C109-C111 \\sim C112-C110
 with sigma of 0.02
 O8A-C1P \\sim O8A-C1N \\sim O8B-C113 \\sim O8B-C116
 with sigma of 0.02
 C1P-C1O \\sim C1O-C1Q \\sim C113-C114 \\sim C115-C114 \\sim C116-C115 \\sim
C1N-C1Q
 with sigma of 0.02
 C1P-C1Q \\sim C1N-C1O \\sim C113-C115 \\sim C114-C116
 with sigma of 0.02
 C7CA-C0EA \\sim C7CA-C3CA \\sim C5CA-C3CA \\sim C4CA-C1CA \\sim C4CA-C2CA
\\sim C6CA-C2CA
 with sigma of 0.02
 O2AA-C0EA \\sim O5AA-C6CA \\sim O5AA-C1CA \\sim O2AA-C5CA
 with sigma of 0.02
 C0EA-C3CA \\sim C7CA-C5CA \\sim C1CA-C2CA \\sim C4CA-C6CA
 with sigma of 0.02
 C8CA-C1BA \\sim C2DA-C1DA \\sim C2DA-C0DA \\sim C3BA-C2BA \\sim C8CA-C3BA
\\sim C9CA-C1DA
 with sigma of 0.02
 O4AA-C2BA \\sim O4AA-C1BA \\sim O3AA-C9CA \\sim O3AA-C0DA
 with sigma of 0.02
 C1BA-C3BA \\sim C8CA-C2BA \\sim C9CA-C2DA \\sim C0DA-C1DA
 with sigma of 0.02
 C75A-C73 \\sim C76A-C73 \\sim C75B-C73 \\sim C74B-C73 \\sim C74A-C73 \\sim
C76B-C73
 with sigma of 0.02
 C16B-C13 \\sim C15B-C13 \\sim C16A-C13 \\sim C15A-C13 \\sim C14B-C13 \\sim
C14A-C13
 with sigma of 0.02
 C16B-C14B \\sim C14A-C15A \\sim C16B-C15B \\sim C14A-C16A
 with sigma of 0.02
 C46B-C43 \\sim C44B-C43 \\sim C45A-C43 \\sim C45B-C43 \\sim C43-C46A \\sim
C44A-C43
 with sigma of 0.02
 C44B-C45B \\sim C44A-C45A
 with sigma of 0.02
 C45A-C46A \\sim C45B-C46B
 with sigma of 0.02
 C46B-C44B \\sim C46A-C44A
 with sigma of 0.02
 O4AA-C3BA \\sim O5AA-C2CA \\sim O4AA-C8CA \\sim O5AA-C4CA
 with sigma of 0.02
 K2-O5AA \\sim K2-O4AA
 with sigma of 0.02
3. Uiso/Uaniso restraints and constraints
Uanis(C1P) = Uanis(C1Q) = Uanis(C1O)
Uanis(O10B) = Uanis(O9B) = Uanis(O14B)
Uanis(C1I) = Uanis(C1H) = Uanis(O13B)
Uanis(C14B) = Uanis(C16B)
Uanis(C3BA) = Uanis(C8CA)
Uanis(C2BA) = Uanis(C1BA)
4. Rigid body (RIGU) restrains
 C75B, C75A, C74B, C74A, C76B, C76A
 with sigma for 1-2 distances of 0.002 and sigma for 1-3 distances of 0.002
 O7B, C110, C109, C111, C112, O7A, C1J, C1K, C1L, C1M
 with sigma for 1-2 distances of 0.002 and sigma for 1-3 distances of 0.002
 C114, O8B, C115, C116, C113, O8A, C1N, C1O, C1P, C1Q
 with sigma for 1-2 distances of 0.002 and sigma for 1-3 distances of 0.002
 C16A, C15B, C15A, C14B, C14A, C16B, C13
 with sigma for 1-2 distances of 0.0005 and sigma for 1-3 distances of 0.0005
 C45B, C45A, C44B, C44A, C46A, C46B, C43
 with sigma for 1-2 distances of 0.001 and sigma for 1-3 distances of 0.001
 K2, O12A, O5AA, O9B, O14B, O11A, O13A, O14A, O10B, O10A, O4AA, O13B, O11B,
 C1A, C1C, C1CA, C6CA, C1B, C1I, C14, C1D, C15, C120, C5CA, C125, C1E, C126,
 C127, C1F, C1H, C119, C118, C2BA, C1BA, C124, C16, C121, C1G, H1AA, H1AB, H1CA,
  H1CB, H1CC, H1CD, C4CA, C2CA, H6CA, H6CB, H1BA, H1BB, H1IA, H1IB, O9A, C117,
 H11C, H11D, H14G, H14H, H1DA, H1DB, H15G, H15H, H12Q, H12R, O2AA, C3CA, H12A,
 H12B, H1EA, H1EB, H12C, H12D, H12E, H12F, C128, H1FA, H1FB, H1HA, H1HB, H11A,
 H11B, H11E, H11F, H2BA, H2BB, C3BA, C8CA, H1BC, H1BD, H12K, H12L, C123, H16G,
 H16H, H12G, H12H, C122, H1GA, H1GB, H4CA, H4CB, H2CA, H2CB, C0EA, H3CA, H3CB,
 C7CA, H12I, H12J, O12B, H12M, H12N, H12O, H12P, H7CA, H7CB, O3AA, C9CA, H9CA,
 H9CB, C1DA, C0DA, H1DC, H1DD, C2DA, H0DA, H0DB, H2DA, H2DB
 with sigma for 1-2 distances of 0.001 and sigma for 1-3 distances of 0.001
5. Others
 Sof(C74B)=Sof(H74D)=Sof(H74E)=Sof(H74F)=Sof(C75B)=Sof(H75D)=Sof(H75E)=
 Sof(H75F)=Sof(C76B)=Sof(H76D)=Sof(H76E)=Sof(H76F)=1-FVAR(1)
 Sof(C76A)=Sof(H76A)=Sof(H76B)=Sof(H76C)=Sof(C74A)=Sof(H74A)=Sof(H74B)=
 Sof(H74C)=Sof(C75A)=Sof(H75A)=Sof(H75B)=Sof(H75C)=FVAR(1)
 Sof(O13B)=Sof(O11B)=Sof(O12B)=Sof(C121)=Sof(H12G)=Sof(H12H)=Sof(C124)=
 Sof(H12K)=Sof(H12L)=Sof(C123)=Sof(H12M)=Sof(H12N)=Sof(C122)=Sof(H12O)=
 Sof(H12P)=Sof(C14)=Sof(H14G)=Sof(H14H)=Sof(O10B)=Sof(C16)=Sof(H16G)=Sof(H16H)=
 Sof(O9B)=Sof(C1B)=Sof(H1BA)=Sof(H1BB)=Sof(O14B)=Sof(C1D)=Sof(H1DA)=Sof(H1DB)=
 Sof(C1F)=Sof(H1FA)=Sof(H1FB)=Sof(C1G)=Sof(H1GA)=Sof(H1GB)=Sof(C1H)=Sof(H1HA)=
 Sof(H1HB)=Sof(C1I)=Sof(H1IA)=Sof(H1IB)=1-FVAR(2)
 Sof(O14A)=Sof(C125)=Sof(H12A)=Sof(H12B)=Sof(O9A)=Sof(C126)=Sof(H12C)=
 Sof(H12D)=Sof(C127)=Sof(H12E)=Sof(H12F)=Sof(O10A)=Sof(C128)=Sof(H12I)=
 Sof(H12J)=Sof(O12A)=Sof(C15)=Sof(H15G)=Sof(H15H)=Sof(O11A)=Sof(O13A)=Sof(C1A)=
 Sof(H1AA)=Sof(H1AB)=Sof(C1C)=Sof(H1CA)=Sof(H1CB)=Sof(C1E)=Sof(H1EA)=Sof(H1EB)=
 Sof(C120)=Sof(H12Q)=Sof(H12R)=Sof(C119)=Sof(H11A)=Sof(H11B)=Sof(C117)=
 Sof(H11C)=Sof(H11D)=Sof(C118)=Sof(H11E)=Sof(H11F)=FVAR(2)
 Sof(O7A)=Sof(C1J)=Sof(H1JA)=Sof(H1JB)=Sof(C1K)=Sof(H1KA)=Sof(H1KB)=Sof(C1L)=
 Sof(H1LA)=Sof(H1LB)=Sof(C1M)=Sof(H1MA)=Sof(H1MB)=1-FVAR(3)
 Sof(O7B)=Sof(C110)=Sof(H11G)=Sof(H11H)=Sof(C109)=Sof(H10S)=Sof(H10T)=
 Sof(C111)=Sof(H11I)=Sof(H11J)=Sof(C112)=Sof(H11K)=Sof(H11L)=FVAR(3)
 Sof(O8A)=Sof(C1N)=Sof(H1NA)=Sof(H1NB)=Sof(C1O)=Sof(H1OA)=Sof(H1OB)=Sof(C1P)=
 Sof(H1PA)=Sof(H1PB)=Sof(C1Q)=Sof(H1QA)=Sof(H1QB)=1-FVAR(4)
 Sof(C114)=Sof(H11M)=Sof(H11N)=Sof(O8B)=Sof(C115)=Sof(H11O)=Sof(H11P)=
 Sof(C116)=Sof(H11Q)=Sof(H11R)=Sof(C113)=Sof(H11S)=Sof(H11T)=FVAR(4)
 Sof(O5AA)=Sof(C1CA)=Sof(H1CC)=Sof(H1CD)=Sof(C2CA)=Sof(H2CA)=Sof(H2CB)=
 Sof(C4CA)=Sof(H4CA)=Sof(H4CB)=Sof(C6CA)=Sof(H6CA)=Sof(H6CB)=1-FVAR(5)
 Sof(O2AA)=Sof(C0EA)=Sof(H0EA)=Sof(H0EB)=Sof(C3CA)=Sof(H3CA)=Sof(H3CB)=
 Sof(C7CA)=Sof(H7CA)=Sof(H7CB)=Sof(C5CA)=Sof(H5CA)=Sof(H5CB)=FVAR(5)
 Sof(O4AA)=Sof(C2BA)=Sof(H2BA)=Sof(H2BB)=Sof(C8CA)=Sof(H8CA)=Sof(H8CB)=
 Sof(C3BA)=Sof(H3BA)=Sof(H3BB)=Sof(C1BA)=Sof(H1BC)=Sof(H1BD)=1-FVAR(6)
 Sof(C9CA)=Sof(H9CA)=Sof(H9CB)=Sof(O3AA)=Sof(C1DA)=Sof(H1DC)=Sof(H1DD)=
 Sof(C0DA)=Sof(H0DA)=Sof(H0DB)=Sof(C2DA)=Sof(H2DA)=Sof(H2DB)=FVAR(6)
 Sof(C14B)=Sof(H14D)=Sof(H14E)=Sof(H14F)=Sof(C15B)=Sof(H15D)=Sof(H15E)=
 Sof(H15F)=Sof(C16B)=Sof(H16D)=Sof(H16E)=Sof(H16F)=1-FVAR(7)
 Sof(C15A)=Sof(H15A)=Sof(H15B)=Sof(H15C)=Sof(C14A)=Sof(H14A)=Sof(H14B)=
 Sof(H14C)=Sof(C16A)=Sof(H16A)=Sof(H16B)=Sof(H16C)=FVAR(7)
 Sof(C46B)=Sof(H46D)=Sof(H46E)=Sof(H46F)=Sof(C45B)=Sof(H45D)=Sof(H45E)=
 Sof(H45F)=Sof(C44B)=Sof(H44D)=Sof(H44E)=Sof(H44F)=1-FVAR(8)
 Sof(C46A)=Sof(H46A)=Sof(H46B)=Sof(H46C)=Sof(C44A)=Sof(H44A)=Sof(H44B)=
 Sof(H44C)=Sof(C45A)=Sof(H45A)=Sof(H45B)=Sof(H45C)=FVAR(8)
6.a Secondary CH2 refined with riding coordinates:
 C17(H17A,H17B), C57(H57A,H57B), C77(H77A,H77B), C87(H87A,H87B), C47(H47A,
 H47B), C27(H27A,H27B), C97(H97A,H97B), C99(H99A,H99B), C98(H98A,H98B),
 C100(H10A,H10B), C107(H10C,H10D), C106(H10E,H10F), C101(H10G,H10H), C108(H10I,
 H10J), C102(H10K,H10L), C103(H10M,H10N), C114(H11M,H11N), C105(H10O,H10P),
 C104(H10Q,H10R), C125(H12A,H12B), C126(H12C,H12D), C127(H12E,H12F), C115(H11O,
 H11P), C116(H11Q,H11R), C121(H12G,H12H), C128(H12I,H12J), C113(H11S,H11T),
 C124(H12K,H12L), C123(H12M,H12N), C122(H12O,H12P), C14(H14G,H14H), C15(H15G,
 H15H), C16(H16G,H16H), C1A(H1AA,H1AB), C1B(H1BA,H1BB), C1C(H1CA,H1CB),
 C1D(H1DA,H1DB), C1E(H1EA,H1EB), C120(H12Q,H12R), C119(H11A,H11B), C117(H11C,
 H11D), C118(H11E,H11F), C1F(H1FA,H1FB), C1G(H1GA,H1GB), C1H(H1HA,H1HB),
 C1I(H1IA,H1IB), C110(H11G,H11H), C109(H10S,H10T), C111(H11I,H11J), C112(H11K,
 H11L), C1J(H1JA,H1JB), C1K(H1KA,H1KB), C1L(H1LA,H1LB), C1M(H1MA,H1MB),
 C1N(H1NA,H1NB), C1O(H1OA,H1OB), C1P(H1PA,H1PB), C1Q(H1QA,H1QB), C0EA(H0EA,
 H0EB), C3CA(H3CA,H3CB), C1CA(H1CC,H1CD), C2CA(H2CA,H2CB), C7CA(H7CA,H7CB),
 C4CA(H4CA,H4CB), C6CA(H6CA,H6CB), C5CA(H5CA,H5CB), C2BA(H2BA,H2BB), C8CA(H8CA,
 H8CB), C3BA(H3BA,H3BB), C1BA(H1BC,H1BD), C9CA(H9CA,H9CB), C1DA(H1DC,H1DD),
 C0DA(H0DA,H0DB), C2DA(H2DA,H2DB)
6.b Me refined with riding coordinates:
 C16B(H16D,H16E,H16F)
6.c Aromatic/amide H refined with riding coordinates:
 C69(H69), C4(H4), C6(H6), C22(H22), C2(H2), C71(H71), C20(H20), C62(H62),
 C41(H41), C80(H80), C82(H82), C11(H11), C39(H39), C9(H9), C32(H32), C52(H52),
 C60(H60), C50(H50), C30(H30), C90(H90), C92(H92)
6.d Idealised Me refined as rotating group:
 C84(H84A,H84B,H84C), C26(H26A,H26B,H26C), C54(H54A,H54B,H54C), C56(H56A,H56B,
 H56C), C86(H86A,H86B,H86C), C94(H94A,H94B,H94C), C36(H36A,H36B,H36C), C25(H25A,
 H25B,H25C), C34(H34A,H34B,H34C), C66(H66A,H66B,H66C), C55(H55A,H55B,H55C),
 C64(H64A,H64B,H64C), C65(H65A,H65B,H65C), C85(H85A,H85B,H85C), C24(H24A,H24B,
 H24C), C35(H35A,H35B,H35C), C96(H96A,H96B,H96C), C46A(H46A,H46B,H46C),
 C76A(H76A,H76B,H76C), C44A(H44A,H44B,H44C), C15A(H15A,H15B,H15C), C14A(H14A,
 H14B,H14C), C95(H95A,H95B,H95C), C74A(H74A,H74B,H74C), C45A(H45A,H45B,H45C),
 C75A(H75A,H75B,H75C), C16A(H16A,H16B,H16C), C74B(H74D,H74E,H74F), C75B(H75D,
 H75E,H75F), C76B(H76D,H76E,H76F), C14B(H14D,H14E,H14F), C15B(H15D,H15E,H15F),
 C46B(H46D,H46E,H46F), C45B(H45D,H45E,H45F), C44B(H44D,H44E,H44F)
;
_atom_sites_solution_hydrogens     geom
_atom_sites_solution_primary       dual
_atom_sites_solution_secondary     ?
loop_
  _atom_site_label
  _atom_site_type_symbol
  _atom_site_fract_x
  _atom_site_fract_y
  _atom_site_fract_z
  _atom_site_U_iso_or_equiv
  _atom_site_adp_type
  _atom_site_occupancy
  _atom_site_site_symmetry_order
  _atom_site_calc_flag
  _atom_site_refinement_flags_posn
  _atom_site_refinement_flags_adp
  _atom_site_refinement_flags_occupancy
  _atom_site_disorder_assembly
  _atom_site_disorder_group
 Y1 Y 0.74613(2) 0.58095(2) 0.58623(2) 0.02253(9) Uani 1 1 d . . . . .
 Y2 Y 0.76173(2) 0.58816(2) 0.77334(2) 0.02683(10) Uani 1 1 d . . . . .
 K1 K 0.26444(5) 0.75722(3) 0.43764(4) 0.0492(2) Uani 1 1 d . . . . .
 K2 K 0.19781(7) 0.42185(4) 0.81138(4) 0.0613(3) Uani 1 1 d D U . . .
 N1 N 0.83720(15) 0.61926(10) 0.55485(11) 0.0286(7) Uani 1 1 d . . . . .
 N3 N 0.64363(14) 0.61549(10) 0.54981(11) 0.0260(6) Uani 1 1 d . . . . .
 O2 O 0.32319(14) 0.67571(9) 0.48236(11) 0.0395(6) Uani 1 1 d . . . . .
 N2 N 0.74906(14) 0.50554(9) 0.56252(11) 0.0235(6) Uani 1 1 d . . . . .
 O3 O 0.40720(16) 0.73386(10) 0.42764(12) 0.0504(8) Uani 1 1 d . . . . .
 N4 N 0.86742(16) 0.62013(11) 0.80696(12) 0.0315(7) Uani 1 1 d . . . . .
 N5 N 0.75571(17) 0.51853(10) 0.81244(12) 0.0339(7) Uani 1 1 d . . . . .
 O1 O 0.17354(15) 0.68321(11) 0.46077(11) 0.0503(8) Uani 1 1 d . . . . .
 N6 N 0.66933(17) 0.62956(11) 0.79708(12) 0.0341(7) Uani 1 1 d . . . . .
 O4 O 0.3526(2) 0.81939(11) 0.38797(13) 0.0603(9) Uani 1 1 d . . . . .
 C69 C 0.77811(18) 0.40794(12) 0.65834(14) 0.0277(8) Uani 1 1 d . . . . .
 H69 H 0.796998 0.389415 0.632593 0.033 Uiso 1 1 calc R . . . .
 C2 C 0.81307(19) 0.55848(13) 0.68429(13) 0.0285(8) Uani 1 1 d . . . . .
 H4 H 0.855109 0.541182 0.686823 0.034 Uiso 1 1 calc R . . . .
 C18 C 0.63274(17) 0.64574(12) 0.50393(14) 0.0256(7) Uani 1 1 d . . . . .
 C68 C 0.77224(17) 0.45534(12) 0.64866(13) 0.0253(7) Uani 1 1 d . . . . .
 O6 O 0.11599(19) 0.76836(14) 0.41987(13) 0.0670(10) Uani 1 1 d . . . . .
 C1 C 0.81842(19) 0.60834(13) 0.68232(13) 0.0287(8) Uani 1 1 d . . . . .
 C17 C 0.57695(18) 0.60662(13) 0.57441(14) 0.0287(8) Uani 1 1 d . . . . .
 H17A H 0.577028 0.574560 0.586030 0.034 Uiso 1 1 calc R . . . .
 H17B H 0.536537 0.610725 0.546077 0.034 Uiso 1 1 calc R . . . .
 O5 O 0.20163(19) 0.82648(11) 0.36478(13) 0.0598(9) Uani 1 1 d . . . . .
 C19 C 0.6406(2) 0.69386(13) 0.50832(16) 0.0345(9) Uani 1 1 d . . . . .
 C78 C 0.71635(17) 0.48525(12) 0.51316(14) 0.0253(7) Uani 1 1 d . . . . .
 C57 C 0.9277(2) 0.60133(13) 0.78096(14) 0.0325(8) Uani 1 1 d . . . . .
 H57A H 0.918269 0.568953 0.772706 0.039 Uiso 1 1 calc R . . . .
 H57B H 0.970714 0.602926 0.807310 0.039 Uiso 1 1 calc R . . . .
 C77 C 0.79909(17) 0.47483(12) 0.59664(13) 0.0245(7) Uani 1 1 d . . . . .
 H77A H 0.843142 0.491766 0.607551 0.029 Uiso 1 1 calc R . . . .
 H77B H 0.810873 0.449081 0.573997 0.029 Uiso 1 1 calc R . . . .
 C3 C 0.74719(18) 0.53496(12) 0.68257(13) 0.0257(7) Uani 1 1 d . . . . .
 C4 C 0.68010(19) 0.56277(13) 0.67543(14) 0.0301(8) Uani 1 1 d . . . . .
 H6 H 0.635712 0.548047 0.671399 0.036 Uiso 1 1 calc R . . . .
 C22 C 0.6071(2) 0.65579(14) 0.40500(16) 0.0391(9) Uani 1 1 d . . . . .
 H22 H 0.594893 0.642915 0.370287 0.047 Uiso 1 1 calc R . . . .
 C5 C 0.68373(19) 0.61221(12) 0.67477(14) 0.0287(8) Uani 1 1 d . . . . .
 C67 C 0.74521(17) 0.48402(12) 0.68775(13) 0.0261(7) Uani 1 1 d . . . . .
 C42 C 0.9426(2) 0.62563(13) 0.72821(14) 0.0314(8) Uani 1 1 d . . . . .
 C23 C 0.61528(18) 0.62688(12) 0.45078(15) 0.0301(8) Uani 1 1 d . . . . .
 C6 C 0.7506(2) 0.63456(13) 0.67822(14) 0.0323(8) Uani 1 1 d . . . . .
 H2 H 0.752085 0.666688 0.677904 0.039 Uiso 1 1 calc R . . . .
 C79 C 0.64322(18) 0.47285(12) 0.50568(15) 0.0285(8) Uani 1 1 d . . . . .
 C12 C 0.6021(2) 0.66911(13) 0.71405(16) 0.0387(9) Uani 1 1 d . . . . .
 C8 C 0.5651(2) 0.63699(13) 0.62345(14) 0.0317(8) Uani 1 1 d . . . . .
 C48 C 0.88595(17) 0.61415(13) 0.51531(14) 0.0288(8) Uani 1 1 d . . . . .
 C71 C 0.72719(19) 0.41579(13) 0.74160(15) 0.0321(8) Uani 1 1 d . . . . .
 H71 H 0.710555 0.402572 0.772277 0.039 Uiso 1 1 calc R . . . .
 C72 C 0.72112(18) 0.46336(13) 0.73463(14) 0.0291(8) Uani 1 1 d . . . . .
 C20 C 0.6327(2) 0.72139(14) 0.46133(17) 0.0439(10) Uani 1 1 d . . . . .
 H20 H 0.638545 0.753196 0.465096 0.053 Uiso 1 1 calc R . . . .
 C70 C 0.75675(19) 0.38719(13) 0.70517(15) 0.0309(8) Uani 1 1 d . . . . .
 C83 C 0.75567(19) 0.47917(12) 0.46760(14) 0.0299(8) Uani 1 1 d . . . . .
 C88 C 0.7928(2) 0.49180(13) 0.85574(15) 0.0377(9) Uani 1 1 d . . . . .
 C7 C 0.6157(2) 0.63980(12) 0.67011(15) 0.0316(8) Uani 1 1 d . . . . .
 C38 C 0.9049(2) 0.65709(13) 0.63699(14) 0.0354(9) Uani 1 1 d . . . . .
 C62 C 0.9290(2) 0.65253(14) 0.95196(15) 0.0413(10) Uani 1 1 d . . . . .
 H62 H 0.947172 0.638046 0.984654 0.050 Uiso 1 1 calc R . . . .
 C41 C 1.0113(2) 0.64269(14) 0.72429(15) 0.0384(9) Uani 1 1 d . . . . .
 H41 H 1.046676 0.638510 0.754003 0.046 Uiso 1 1 calc R . . . .
 C37 C 0.8888(2) 0.63107(12) 0.68295(14) 0.0301(8) Uani 1 1 d . . . . .
 C87 C 0.6968(2) 0.49270(13) 0.78024(15) 0.0355(9) Uani 1 1 d . . . . .
 H87A H 0.660948 0.514536 0.764170 0.043 Uiso 1 1 calc R . . . .
 H87B H 0.674133 0.472843 0.804996 0.043 Uiso 1 1 calc R . . . .
 C80 C 0.6113(2) 0.45797(13) 0.45375(17) 0.0382(9) Uani 1 1 d . . . . .
 H80 H 0.562587 0.450995 0.449189 0.046 Uiso 1 1 calc R . . . .
 C53 C 0.87326(18) 0.63864(14) 0.46473(14) 0.0311(8) Uani 1 1 d . . . . .
 C84 C 0.5998(2) 0.47579(13) 0.55310(18) 0.0401(10) Uani 1 1 d . . . . .
 H84A H 0.630644 0.471404 0.586992 0.060 Uiso 1 1 calc GR . . . .
 H84B H 0.563508 0.452216 0.549396 0.060 Uiso 1 1 calc GR . . . .
 H84C H 0.577402 0.505615 0.553244 0.060 Uiso 1 1 calc GR . . . .
 C63 C 0.9148(2) 0.62594(13) 0.90448(15) 0.0352(9) Uani 1 1 d . . . . .
 O14A O 0.2256(3) 0.3987(3) 0.7056(4) 0.0600(19) Uani 0.502(6) 1 d D U P A 7
 C21 C 0.6165(2) 0.70300(14) 0.40956(17) 0.0455(10) Uani 1 1 d . . . . .
 C26 C 0.6085(2) 0.57564(13) 0.44333(16) 0.0390(9) Uani 1 1 d . . . . .
 H26A H 0.654452 0.561413 0.453197 0.059 Uiso 1 1 calc GR . . . .
 H26B H 0.591644 0.568841 0.405551 0.059 Uiso 1 1 calc GR . . . .
 H26C H 0.574927 0.563824 0.466480 0.059 Uiso 1 1 calc GR . . . .
 C54 C 0.9623(2) 0.55793(15) 0.57684(16) 0.0389(9) Uani 1 1 d . . . . .
 H54A H 0.978342 0.578585 0.606519 0.058 Uiso 1 1 calc GR . . . .
 H54B H 0.999170 0.535655 0.572752 0.058 Uiso 1 1 calc GR . . . .
 H54C H 0.919658 0.542252 0.584758 0.058 Uiso 1 1 calc GR . . . .
 C61 C 0.9172(2) 0.69942(14) 0.95231(16) 0.0393(9) Uani 1 1 d . . . . .
 C58 C 0.88777(18) 0.64688(13) 0.85443(14) 0.0296(8) Uani 1 1 d . . . . .
 C89 C 0.8551(2) 0.46657(13) 0.84948(16) 0.0382(9) Uani 1 1 d . . . . .
 C82 C 0.7216(2) 0.46323(14) 0.41749(15) 0.0391(9) Uani 1 1 d . . . . .
 H82 H 0.748719 0.459152 0.388502 0.047 Uiso 1 1 calc R . . . .
 C47 C 0.8495(2) 0.66244(13) 0.58656(14) 0.0355(9) Uani 1 1 d . . . . .
 H47A H 0.804502 0.672624 0.598179 0.043 Uiso 1 1 calc R . . . .
 H47B H 0.865568 0.686175 0.562879 0.043 Uiso 1 1 calc R . . . .
 C56 C 0.80753(19) 0.66810(14) 0.45241(15) 0.0350(9) Uani 1 1 d . . . . .
 H56A H 0.766033 0.650848 0.459671 0.052 Uiso 1 1 calc GR . . . .
 H56B H 0.802338 0.677163 0.414385 0.052 Uiso 1 1 calc GR . . . .
 H56C H 0.812147 0.695166 0.475268 0.052 Uiso 1 1 calc GR . . . .
 C11 C 0.5381(2) 0.69378(15) 0.70944(17) 0.0492(11) Uani 1 1 d . . . . .
 H11 H 0.529691 0.713223 0.738234 0.059 Uiso 1 1 calc R . . . .
 C49 C 0.94611(19) 0.58509(14) 0.52424(15) 0.0333(8) Uani 1 1 d . . . . .
 C86 C 0.83365(19) 0.49291(15) 0.47240(15) 0.0382(9) Uani 1 1 d . . . . .
 H86A H 0.837367 0.526001 0.471959 0.057 Uiso 1 1 calc GR . . . .
 H86B H 0.855017 0.480273 0.441990 0.057 Uiso 1 1 calc GR . . . .
 H86C H 0.858232 0.481214 0.506297 0.057 Uiso 1 1 calc GR . . . .
 C28 C 0.6231(2) 0.62166(13) 0.83776(15) 0.0345(9) Uani 1 1 d . . . . .
 C39 C 0.9739(2) 0.67334(15) 0.63594(16) 0.0442(11) Uani 1 1 d . . . . .
 H39 H 0.983656 0.690324 0.605471 0.053 Uiso 1 1 calc R . . . .
 C9 C 0.5014(2) 0.66217(15) 0.62170(17) 0.0430(10) Uani 1 1 d . . . . .
 H9 H 0.467634 0.659615 0.590709 0.052 Uiso 1 1 calc R . . . .
 C81 C 0.6494(2) 0.45324(15) 0.40904(16) 0.0428(10) Uani 1 1 d . . . . .
 O13B O 0.1613(10) 0.4739(5) 0.7147(5) 0.114(3) Uani 0.498(6) 1 d D U P A 8
 C32 C 0.6003(2) 0.63013(18) 0.93254(17) 0.0527(12) Uani 1 1 d . . . . .
 H32 H 0.613402 0.642503 0.967406 0.063 Uiso 1 1 calc R . . . .
 C33 C 0.6431(2) 0.63922(15) 0.89146(15) 0.0390(9) Uani 1 1 d . . . . .
 C52 C 0.92065(19) 0.63324(16) 0.42560(15) 0.0414(10) Uani 1 1 d . . . . .
 H52 H 0.912090 0.649475 0.392647 0.050 Uiso 1 1 calc R . . . .
 C60 C 0.8912(2) 0.72003(14) 0.90317(17) 0.0405(9) Uani 1 1 d . . . . .
 H60 H 0.883079 0.751749 0.902455 0.049 Uiso 1 1 calc R . . . .
 C94 C 0.8875(2) 0.46641(15) 0.79654(17) 0.0429(10) Uani 1 1 d . . . . .
 H94A H 0.871531 0.439529 0.775507 0.064 Uiso 1 1 calc GR . . . .
 H94B H 0.938858 0.465903 0.804331 0.064 Uiso 1 1 calc GR . . . .
 H94C H 0.872809 0.493708 0.775845 0.064 Uiso 1 1 calc GR . . . .
 C27 C 0.6546(2) 0.67288(13) 0.76663(15) 0.0406(10) Uani 1 1 d . . . . .
 H27A H 0.699699 0.685020 0.757123 0.049 Uiso 1 1 calc R . . . .
 H27B H 0.635811 0.695112 0.790836 0.049 Uiso 1 1 calc R . . . .
 C97 C 0.2076(2) 0.65592(17) 0.50485(18) 0.0495(11) Uani 1 1 d . . . . .
 H97A H 0.176704 0.630418 0.512283 0.059 Uiso 1 1 calc R . . . .
 H97B H 0.216686 0.674567 0.537921 0.059 Uiso 1 1 calc R . . . .
 C36 C 0.7124(2) 0.66535(17) 0.90429(16) 0.0463(11) Uani 1 1 d . . . . .
 H36A H 0.752059 0.644642 0.902800 0.069 Uiso 1 1 calc GR . . . .
 H36B H 0.714800 0.678500 0.940488 0.069 Uiso 1 1 calc GR . . . .
 H36C H 0.714529 0.689602 0.877761 0.069 Uiso 1 1 calc GR . . . .
 C40 C 1.0295(2) 0.66567(15) 0.67794(16) 0.0429(10) Uani 1 1 d . . . . .
 C99 C 0.3893(2) 0.66053(15) 0.46581(19) 0.0493(11) Uani 1 1 d . . . . .
 H99A H 0.380983 0.647140 0.429244 0.059 Uiso 1 1 calc R . . . .
 H99B H 0.410434 0.636986 0.490998 0.059 Uiso 1 1 calc R . . . .
 C50 C 0.9914(2) 0.58056(16) 0.48349(17) 0.0430(10) Uani 1 1 d . . . . .
 H50 H 1.030575 0.560757 0.489583 0.052 Uiso 1 1 calc R . . . .
 C73 C 0.7676(2) 0.33504(14) 0.71553(15) 0.0416(10) Uani 1 1 d D . . . .
 C25 C 0.6587(3) 0.71664(14) 0.56373(17) 0.0481(11) Uani 1 1 d . . . . .
 H25A H 0.615854 0.729414 0.575463 0.072 Uiso 1 1 calc GR . . . .
 H25B H 0.692953 0.740890 0.560915 0.072 Uiso 1 1 calc GR . . . .
 H25C H 0.678700 0.694131 0.590071 0.072 Uiso 1 1 calc GR . . . .
 C59 C 0.8767(2) 0.69496(13) 0.85449(16) 0.0383(9) Uani 1 1 d . . . . .
 C51 C 0.9799(2) 0.60464(17) 0.43404(17) 0.0462(11) Uani 1 1 d . . . . .
 C34 C 0.5330(2) 0.57719(16) 0.77158(18) 0.0498(11) Uani 1 1 d . . . . .
 H34A H 0.496688 0.597334 0.753822 0.075 Uiso 1 1 calc GR . . . .
 H34B H 0.513182 0.546930 0.775257 0.075 Uiso 1 1 calc GR . . . .
 H34C H 0.572208 0.575327 0.749863 0.075 Uiso 1 1 calc GR . . . .
 C29 C 0.5598(2) 0.59595(14) 0.82774(16) 0.0402(9) Uani 1 1 d . . . . .
 C98 C 0.2766(2) 0.63784(14) 0.48932(17) 0.0426(10) Uani 1 1 d . . . . .
 H98A H 0.298784 0.617388 0.517897 0.051 Uiso 1 1 calc R . . . .
 H98B H 0.267797 0.620398 0.455314 0.051 Uiso 1 1 calc R . . . .
 O11B O 0.1577(5) 0.4598(3) 0.9117(3) 0.0594(18) Uani 0.498(6) 1 d D U P A 8
 C10 C 0.4864(2) 0.69094(17) 0.66443(18) 0.0532(12) Uani 1 1 d . . . . .
 C31 C 0.5391(3) 0.60353(19) 0.92375(18) 0.0564(13) Uani 1 1 d . . . . .
 C100 C 0.4394(2) 0.70052(17) 0.4657(2) 0.0584(13) Uani 1 1 d . . . . .
 H10A H 0.448270 0.713890 0.502210 0.070 Uiso 1 1 calc R . . . .
 H10B H 0.484940 0.690412 0.454814 0.070 Uiso 1 1 calc R . . . .
 C66 C 0.9232(3) 0.57410(14) 0.90760(17) 0.0559(13) Uani 1 1 d . . . . .
 H66A H 0.934384 0.564906 0.945367 0.084 Uiso 1 1 calc GR . . . .
 H66B H 0.961250 0.564735 0.887189 0.084 Uiso 1 1 calc GR . . . .
 H66C H 0.879151 0.559686 0.892223 0.084 Uiso 1 1 calc GR . . . .
 C30 C 0.5194(2) 0.58692(16) 0.87107(18) 0.0514(11) Uani 1 1 d . . . . .
 H30 H 0.478017 0.569149 0.864170 0.062 Uiso 1 1 calc R . . . .
 C55 C 1.0306(2) 0.5989(2) 0.3905(2) 0.0677(16) Uani 1 1 d . . . . .
 H55A H 1.013078 0.616490 0.358369 0.102 Uiso 1 1 calc GR . . . .
 H55B H 1.033252 0.566832 0.380797 0.102 Uiso 1 1 calc GR . . . .
 H55C H 1.077581 0.609727 0.404812 0.102 Uiso 1 1 calc GR . . . .
 C93 C 0.7667(3) 0.49143(15) 0.90782(16) 0.0533(12) Uani 1 1 d . . . . .
 C107 C 0.0741(3) 0.7286(2) 0.4241(2) 0.0711(17) Uani 1 1 d . . . . .
 H10C H 0.072555 0.710562 0.390607 0.085 Uiso 1 1 calc R . . . .
 H10D H 0.025348 0.737512 0.428795 0.085 Uiso 1 1 calc R . . . .
 C106 C 0.0864(3) 0.7991(2) 0.3778(2) 0.0740(18) Uani 1 1 d . . . . .
 H10E H 0.038555 0.808416 0.384305 0.089 Uiso 1 1 calc R . . . .
 H10F H 0.083051 0.783808 0.342240 0.089 Uiso 1 1 calc R . . . .
 C64 C 0.8498(3) 0.71955(16) 0.8018(2) 0.0694(16) Uani 1 1 d . . . . .
 H64A H 0.881063 0.713050 0.774545 0.104 Uiso 1 1 calc GR . . . .
 H64B H 0.848953 0.752247 0.808384 0.104 Uiso 1 1 calc GR . . . .
 H64C H 0.802171 0.709042 0.788917 0.104 Uiso 1 1 calc GR . . . .
 C90 C 0.8893(3) 0.44249(16) 0.89454(18) 0.0528(11) Uani 1 1 d . . . . .
 H90 H 0.930630 0.425879 0.890040 0.063 Uiso 1 1 calc R . . . .
 C101 C 0.4521(3) 0.77279(17) 0.4234(2) 0.0659(14) Uani 1 1 d . . . . .
 H10G H 0.499947 0.762851 0.417624 0.079 Uiso 1 1 calc R . . . .
 H10H H 0.455534 0.790856 0.457004 0.079 Uiso 1 1 calc R . . . .
 C65 C 0.9315(3) 0.72730(17) 1.00509(18) 0.0603(13) Uani 1 1 d . . . . .
 H65A H 0.892546 0.723211 1.026603 0.090 Uiso 1 1 calc GR . . . .
 H65B H 0.935798 0.759427 0.996227 0.090 Uiso 1 1 calc GR . . . .
 H65C H 0.975362 0.716886 1.025790 0.090 Uiso 1 1 calc GR . . . .
 C92 C 0.8041(3) 0.46677(19) 0.95097(18) 0.0694(15) Uani 1 1 d . . . . .
 H92 H 0.787170 0.467043 0.985108 0.083 Uiso 1 1 calc R . . . .
 O12B O 0.0997(4) 0.4998(3) 0.8119(3) 0.0520(17) Uani 0.498(6) 1 d D U P A 8
 C108 C 0.1054(3) 0.7003(2) 0.4722(2) 0.0654(15) Uani 1 1 d . . . . .
 H10I H 0.111329 0.719108 0.505266 0.079 Uiso 1 1 calc R . . . .
 H10J H 0.073719 0.674754 0.477936 0.079 Uiso 1 1 calc R . . . .
 C85 C 0.6126(3) 0.4389(2) 0.35301(19) 0.0710(16) Uani 1 1 d . . . . .
 H85A H 0.563679 0.430659 0.355975 0.107 Uiso 1 1 calc GR . . . .
 H85B H 0.637199 0.412885 0.339866 0.107 Uiso 1 1 calc GR . . . .
 H85C H 0.613583 0.464209 0.327696 0.107 Uiso 1 1 calc GR . . . .
 C102 C 0.4196(3) 0.80133(18) 0.3755(2) 0.0664(14) Uani 1 1 d . . . . .
 H10K H 0.451684 0.826466 0.368931 0.080 Uiso 1 1 calc R . . . .
 H10L H 0.412116 0.782404 0.342593 0.080 Uiso 1 1 calc R . . . .
 C91 C 0.8652(3) 0.4421(2) 0.9451(2) 0.0683(15) Uani 1 1 d . . . . .
 C24 C 0.6111(4) 0.73315(17) 0.3586(2) 0.0782(18) Uani 1 1 d . . . . .
 H24A H 0.656208 0.733101 0.343935 0.117 Uiso 1 1 calc GR . . . .
 H24B H 0.599232 0.764173 0.368123 0.117 Uiso 1 1 calc GR . . . .
 H24C H 0.574301 0.721299 0.331504 0.117 Uiso 1 1 calc GR . . . .
 C35 C 0.4944(3) 0.5924(3) 0.9698(2) 0.090(2) Uani 1 1 d . . . . .
 H35A H 0.506692 0.562192 0.984145 0.136 Uiso 1 1 calc GR . . . .
 H35B H 0.444379 0.593230 0.955741 0.136 Uiso 1 1 calc GR . . . .
 H35C H 0.503916 0.614878 0.998702 0.136 Uiso 1 1 calc GR . . . .
 C103 C 0.3177(3) 0.84695(18) 0.3444(2) 0.0748(17) Uani 1 1 d . . . . .
 H10M H 0.308630 0.828630 0.311096 0.090 Uiso 1 1 calc R . . . .
 H10N H 0.348190 0.872762 0.337195 0.090 Uiso 1 1 calc R . . . .
 C114 C 0.5523(6) 0.4089(3) 0.6672(4) 0.069(2) Uani 0.778(8) 1 d D U P B 5
 H11M H 0.528460 0.397419 0.632423 0.083 Uiso 0.778(8) 1 calc R . P B 5
 H11N H 0.603824 0.408988 0.666114 0.083 Uiso 0.778(8) 1 calc R . P B 5
 C105 C 0.1339(3) 0.8402(2) 0.3781(2) 0.0792(19) Uani 1 1 d . . . . .
 H10O H 0.112816 0.862691 0.351552 0.095 Uiso 1 1 calc R . . . .
 H10P H 0.139088 0.854421 0.414284 0.095 Uiso 1 1 calc R . . . .
 C104 C 0.2491(4) 0.86424(18) 0.3606(3) 0.085(2) Uani 1 1 d . . . . .
 H10Q H 0.257853 0.880104 0.395662 0.102 Uiso 1 1 calc R . . . .
 H10R H 0.227613 0.886054 0.333262 0.102 Uiso 1 1 calc R . . . .
 C125 C 0.1404(7) 0.4547(5) 0.6710(5) 0.069(3) Uani 0.502(6) 1 d D U P A 7
 H12A H 0.126929 0.476090 0.640994 0.083 Uiso 0.502(6) 1 calc R U P A 7
 H12B H 0.103180 0.431410 0.670866 0.083 Uiso 0.502(6) 1 calc R U P A 7
 O9A O 0.3125(5) 0.3583(3) 0.7943(5) 0.092(2) Uani 0.502(6) 1 d D U P A 7
 C96 C 0.7017(3) 0.51879(19) 0.9163(2) 0.0771(18) Uani 1 1 d . . . . .
 H96A H 0.710036 0.550828 0.909075 0.116 Uiso 1 1 calc GR . . . .
 H96B H 0.691852 0.515251 0.953656 0.116 Uiso 1 1 calc GR . . . .
 H96C H 0.661452 0.507929 0.891687 0.116 Uiso 1 1 calc GR . . . .
 C46A C 1.1567(8) 0.6798(6) 0.7242(4) 0.070(3) Uani 0.69(2) 1 d D U P C 17
 H46A H 1.137760 0.700870 0.749062 0.105 Uiso 0.69(2) 1 calc GR . P C 17
 H46B H 1.203249 0.690206 0.717020 0.105 Uiso 0.69(2) 1 calc GR . P C 17
 H46C H 1.160884 0.649565 0.740515 0.105 Uiso 0.69(2) 1 calc GR . P C 17
 C76A C 0.7574(5) 0.3187(3) 0.7725(3) 0.041(2) Uani 0.609(14) 1 d D U P D 3
 H76A H 0.787048 0.336665 0.799330 0.061 Uiso 0.609(14) 1 calc GR . P D 3
 H76B H 0.770636 0.286693 0.776396 0.061 Uiso 0.609(14) 1 calc GR . P D 3
 H76C H 0.707948 0.322265 0.778132 0.061 Uiso 0.609(14) 1 calc GR . P D 3
 C13 C 0.4165(3) 0.7180(2) 0.6640(2) 0.0907(17) Uani 1 1 d D U . . .
 C126 C 0.2119(7) 0.4323(6) 0.6649(5) 0.080(3) Uani 0.502(6) 1 d D U P A 7
 H12C H 0.210413 0.418294 0.628758 0.095 Uiso 0.502(6) 1 calc R U P A 7
 H12D H 0.249664 0.455404 0.668732 0.095 Uiso 0.502(6) 1 calc R U P A 7
 C43 C 1.1075(2) 0.67778(18) 0.67148(17) 0.0604(12) Uani 1 1 d D U . . .
 O8B O 0.4664(5) 0.4058(3) 0.7279(4) 0.147(4) Uani 0.778(8) 1 d D U P B 5
 C127 C 0.2892(6) 0.3760(6) 0.6970(7) 0.097(4) Uani 0.502(6) 1 d D U P A 7
 H12E H 0.329007 0.397610 0.698789 0.116 Uiso 0.502(6) 1 calc R U P A 7
 H12F H 0.284142 0.360760 0.661417 0.116 Uiso 0.502(6) 1 calc R U P A 7
 O10A O 0.2647(6) 0.3676(4) 0.8976(4) 0.105(3) Uani 0.502(6) 1 d D U P A 7
 C44A C 1.1107(7) 0.7247(3) 0.6419(5) 0.068(3) Uani 0.69(2) 1 d D U P C 17
 H44A H 1.084883 0.722585 0.605561 0.103 Uiso 0.69(2) 1 calc GR . P C 17
 H44B H 1.159836 0.732617 0.639237 0.103 Uiso 0.69(2) 1 calc GR . P C 17
 H44C H 1.089327 0.748168 0.662350 0.103 Uiso 0.69(2) 1 calc GR . P C 17
 C15A C 0.4337(4) 0.7693(3) 0.6689(5) 0.128(3) Uani 0.859(7) 1 d D U P E 15
 H15A H 0.465097 0.774894 0.702310 0.191 Uiso 0.859(7) 1 calc GR . P E 15
 H15B H 0.390077 0.786499 0.669651 0.191 Uiso 0.859(7) 1 calc GR . P E 15
 H15C H 0.456849 0.779003 0.637966 0.191 Uiso 0.859(7) 1 calc GR . P E 15
 C14A C 0.3632(4) 0.7068(3) 0.6160(3) 0.114(3) Uani 0.859(7) 1 d D U P E 15
 H14A H 0.379741 0.718193 0.582960 0.171 Uiso 0.859(7) 1 calc GR . P E 15
 H14B H 0.318033 0.720928 0.620588 0.171 Uiso 0.859(7) 1 calc GR . P E 15
 H14C H 0.357147 0.673844 0.613373 0.171 Uiso 0.859(7) 1 calc GR . P E 15
 C115 C 0.5250(3) 0.4565(3) 0.6805(3) 0.073(2) Uani 0.778(8) 1 d D U P B 5
 H11O H 0.563376 0.474960 0.699734 0.088 Uiso 0.778(8) 1 calc R . P B 5
 H11P H 0.505843 0.472569 0.647124 0.088 Uiso 0.778(8) 1 calc R . P B 5
 C95 C 0.9039(5) 0.4150(3) 0.9932(3) 0.125(3) Uani 1 1 d . . . . .
 H95A H 0.912639 0.384020 0.981593 0.188 Uiso 1 1 calc GR . . . .
 H95B H 0.874682 0.414110 1.022778 0.188 Uiso 1 1 calc GR . . . .
 H95C H 0.948803 0.429718 1.005672 0.188 Uiso 1 1 calc GR . . . .
 C116 C 0.4696(4) 0.4485(4) 0.7150(3) 0.092(3) Uani 0.778(8) 1 d D U P B 5
 H11Q H 0.479078 0.466894 0.748295 0.111 Uiso 0.778(8) 1 calc R . P B 5
 H11R H 0.423682 0.458195 0.695838 0.111 Uiso 0.778(8) 1 calc R . P B 5
 C74A C 0.8501(5) 0.3223(3) 0.7122(6) 0.076(4) Uani 0.609(14) 1 d D U P D 3
 H74A H 0.861642 0.328641 0.675748 0.114 Uiso 0.609(14) 1 calc GR . P D 3
 H74B H 0.857845 0.290151 0.720388 0.114 Uiso 0.609(14) 1 calc GR . P D 3
 H74C H 0.880270 0.340629 0.738346 0.114 Uiso 0.609(14) 1 calc GR . P D 3
 C121 C 0.0956(6) 0.4860(4) 0.9068(5) 0.063(2) Uani 0.498(6) 1 d D U P A 8
 H12G H 0.090587 0.501446 0.941373 0.076 Uiso 0.498(6) 1 calc R U P A 8
 H12H H 0.053899 0.466589 0.897095 0.076 Uiso 0.498(6) 1 calc R U P A 8
 C45A C 1.1336(6) 0.6410(4) 0.6325(6) 0.076(3) Uani 0.69(2) 1 d D U P C 17
 H45A H 1.130640 0.610875 0.648606 0.114 Uiso 0.69(2) 1 calc GR . P C 17
 H45B H 1.182468 0.647298 0.627160 0.114 Uiso 0.69(2) 1 calc GR . P C 17
 H45C H 1.103885 0.641942 0.597711 0.114 Uiso 0.69(2) 1 calc GR . P C 17
 C75A C 0.7244(8) 0.3066(3) 0.6730(4) 0.083(5) Uani 0.609(14) 1 d D U P D 3
 H75A H 0.733625 0.274389 0.680499 0.125 Uiso 0.609(14) 1 calc GR . P D 3
 H75B H 0.737366 0.314075 0.637327 0.125 Uiso 0.609(14) 1 calc GR . P D 3
 H75C H 0.674278 0.312798 0.673757 0.125 Uiso 0.609(14) 1 calc GR . P D 3
 C128 C 0.3003(7) 0.3421(6) 0.7421(6) 0.102(4) Uani 0.502(6) 1 d D U P A 7
 H12I H 0.258316 0.322308 0.739510 0.122 Uiso 0.502(6) 1 calc R U P A 7
 H12J H 0.340736 0.322764 0.735731 0.122 Uiso 0.502(6) 1 calc R U P A 7
 C113 C 0.5322(5) 0.3812(4) 0.7152(4) 0.102(3) Uani 0.778(8) 1 d D U P B 5
 H11S H 0.521927 0.349261 0.704984 0.122 Uiso 0.778(8) 1 calc R . P B 5
 H11T H 0.569767 0.382121 0.746174 0.122 Uiso 0.778(8) 1 calc R . P B 5
 C124 C 0.1041(10) 0.5037(5) 0.7137(4) 0.086(4) Uani 0.498(6) 1 d D U P A 8
 H12K H 0.059786 0.486367 0.706089 0.103 Uiso 0.498(6) 1 calc R U P A 8
 H12L H 0.105945 0.525814 0.684058 0.103 Uiso 0.498(6) 1 calc R U P A 8
 C16A C 0.3840(4) 0.7053(4) 0.7177(3) 0.130(3) Uani 0.859(7) 1 d D U P E 15
 H16A H 0.376356 0.672561 0.718861 0.195 Uiso 0.859(7) 1 calc GR . P E 15
 H16B H 0.338981 0.721056 0.718056 0.195 Uiso 0.859(7) 1 calc GR . P E 15
 H16C H 0.416492 0.714594 0.749120 0.195 Uiso 0.859(7) 1 calc GR . P E 15
 C123 C 0.1037(7) 0.5296(3) 0.7672(4) 0.060(2) Uani 0.498(6) 1 d D U P A 8
 H12M H 0.146973 0.548036 0.773970 0.072 Uiso 0.498(6) 1 calc R U P A 8
 H12N H 0.062912 0.550441 0.764030 0.072 Uiso 0.498(6) 1 calc R U P A 8
 C122 C 0.1023(6) 0.5213(4) 0.8619(4) 0.058(2) Uani 0.498(6) 1 d D U P A 8
 H12O H 0.063482 0.543542 0.860951 0.070 Uiso 0.498(6) 1 calc R U P A 8
 H12P H 0.147336 0.537835 0.869797 0.070 Uiso 0.498(6) 1 calc R U P A 8
 C74B C 0.7994(13) 0.3127(4) 0.6711(6) 0.081(8) Uani 0.391(14) 1 d D U P D 4
 H74D H 0.801947 0.279991 0.677404 0.122 Uiso 0.391(14) 1 calc GR . P D 4
 H74E H 0.846860 0.324694 0.669718 0.122 Uiso 0.391(14) 1 calc GR . P D 4
 H74F H 0.770384 0.318779 0.636697 0.122 Uiso 0.391(14) 1 calc GR . P D 4
 C75B C 0.6890(7) 0.3170(5) 0.7147(11) 0.102(9) Uani 0.391(14) 1 d D U P D 4
 H75D H 0.664191 0.335656 0.738832 0.153 Uiso 0.391(14) 1 calc GR . P D 4
 H75E H 0.689817 0.285487 0.726911 0.153 Uiso 0.391(14) 1 calc GR . P D 4
 H75F H 0.664597 0.318936 0.677936 0.153 Uiso 0.391(14) 1 calc GR . P D 4
 C76B C 0.8021(16) 0.3298(7) 0.7727(5) 0.099(9) Uani 0.391(14) 1 d D U P D 4
 H76D H 0.848551 0.344183 0.776440 0.149 Uiso 0.391(14) 1 calc GR . P D 4
 H76E H 0.807461 0.297494 0.781442 0.149 Uiso 0.391(14) 1 calc GR . P D 4
 H76F H 0.772917 0.344153 0.797412 0.149 Uiso 0.391(14) 1 calc GR . P D 4
 O12A O 0.0952(6) 0.4785(4) 0.8282(4) 0.086(3) Uani 0.502(6) 1 d D U P A 7
 C14 C 0.2319(9) 0.4173(5) 0.6738(5) 0.081(3) Uani 0.498(6) 1 d D U P A 8
 H14G H 0.233343 0.400188 0.639843 0.098 Uiso 0.498(6) 1 calc R U P A 8
 H14H H 0.276032 0.434925 0.680563 0.098 Uiso 0.498(6) 1 calc R U P A 8
 O10B O 0.2108(7) 0.3715(3) 0.9100(3) 0.101(2) Uani 0.498(6) 1 d D U P A 8
 C15 C 0.1145(9) 0.4544(6) 0.9195(6) 0.109(4) Uani 0.502(6) 1 d D U P A 7
 H15G H 0.111039 0.464595 0.956863 0.131 Uiso 0.502(6) 1 calc R U P A 7
 H15H H 0.079372 0.430043 0.911130 0.131 Uiso 0.502(6) 1 calc R U P A 7
 C16 C 0.1713(9) 0.4498(5) 0.6659(5) 0.077(4) Uani 0.498(6) 1 d D U P A 8
 H16G H 0.179603 0.471894 0.637598 0.093 Uiso 0.498(6) 1 calc R U P A 8
 H16H H 0.127839 0.432833 0.653176 0.093 Uiso 0.498(6) 1 calc R U P A 8
 O11A O 0.1813(6) 0.4360(5) 0.9180(4) 0.117(3) Uani 0.502(6) 1 d D U P A 7
 O9B O 0.2775(7) 0.3448(3) 0.8151(3) 0.101(2) Uani 0.498(6) 1 d D U P A 8
 O13A O 0.1499(5) 0.4788(4) 0.7228(4) 0.0560(17) Uani 0.502(6) 1 d D U P A 7
 C1a C 0.0851(9) 0.5133(5) 0.7902(6) 0.090(4) Uani 0.502(6) 1 d D U P A 7
 H1AA H 0.124842 0.534848 0.796980 0.108 Uiso 0.502(6) 1 calc R U P A 7
 H1AB H 0.041644 0.529865 0.795700 0.108 Uiso 0.502(6) 1 calc R U P A 7
 C1b C 0.2792(10) 0.3235(4) 0.7631(4) 0.098(5) Uani 0.498(6) 1 d D U P A 8
 H1BA H 0.234944 0.306322 0.753886 0.117 Uiso 0.498(6) 1 calc R U P A 8
 H1BB H 0.318404 0.301379 0.766166 0.117 Uiso 0.498(6) 1 calc R U P A 8
 O14B O 0.2296(8) 0.3868(4) 0.7154(4) 0.101(2) Uani 0.498(6) 1 d D U P A 8
 C1c C 0.0938(10) 0.4945(6) 0.8812(5) 0.110(5) Uani 0.502(6) 1 d D U P A 7
 H1CA H 0.046075 0.505484 0.885917 0.132 Uiso 0.502(6) 1 calc R U P A 7
 H1CB H 0.127411 0.519817 0.888829 0.132 Uiso 0.502(6) 1 calc R U P A 7
 C1d C 0.2882(8) 0.3561(5) 0.7169(4) 0.086(3) Uani 0.498(6) 1 d D U P A 8
 H1DA H 0.333345 0.372590 0.723818 0.103 Uiso 0.498(6) 1 calc R U P A 8
 H1DB H 0.286965 0.339491 0.682303 0.103 Uiso 0.498(6) 1 calc R U P A 8
 C1e C 0.0795(8) 0.4982(6) 0.7323(6) 0.088(4) Uani 0.502(6) 1 d D U P A 7
 H1EA H 0.067378 0.524235 0.707954 0.106 Uiso 0.502(6) 1 calc R U P A 7
 H1EB H 0.042287 0.474978 0.725132 0.106 Uiso 0.502(6) 1 calc R U P A 7
 C120 C 0.1868(11) 0.4000(9) 0.9550(8) 0.150(6) Uani 0.502(6) 1 d D U P A 7
 H12Q H 0.151648 0.376139 0.944285 0.179 Uiso 0.502(6) 1 calc R U P A 7
 H12R H 0.181384 0.410629 0.991893 0.179 Uiso 0.502(6) 1 calc R U P A 7
 C119 C 0.2607(10) 0.3837(7) 0.9512(6) 0.137(5) Uani 0.502(6) 1 d D U P A 7
 H11A H 0.294495 0.408761 0.959733 0.164 Uiso 0.502(6) 1 calc R U P A 7
 H11B H 0.272844 0.358967 0.977502 0.164 Uiso 0.502(6) 1 calc R U P A 7
 C117 C 0.3309(9) 0.3253(5) 0.8380(7) 0.125(4) Uani 0.502(6) 1 d D U P A 7
 H11C H 0.378308 0.312728 0.835203 0.150 Uiso 0.502(6) 1 calc R U P A 7
 H11D H 0.296842 0.299932 0.834262 0.150 Uiso 0.502(6) 1 calc R U P A 7
 C118 C 0.3302(8) 0.3478(5) 0.8928(7) 0.122(4) Uani 0.502(6) 1 d D U P A 7
 H11E H 0.341043 0.324940 0.921659 0.146 Uiso 0.502(6) 1 calc R U P A 7
 H11F H 0.367222 0.371393 0.897680 0.146 Uiso 0.502(6) 1 calc R U P A 7
 C1f C 0.2155(9) 0.3959(5) 0.9585(5) 0.088(4) Uani 0.498(6) 1 d D U P A 8
 H1FA H 0.259138 0.414238 0.963559 0.106 Uiso 0.498(6) 1 calc R U P A 8
 H1FB H 0.215210 0.375226 0.989648 0.106 Uiso 0.498(6) 1 calc R U P A 8
 C1g C 0.1503(8) 0.4265(4) 0.9525(4) 0.078(3) Uani 0.498(6) 1 d D U P A 8
 H1GA H 0.107557 0.408087 0.942198 0.093 Uiso 0.498(6) 1 calc R U P A 8
 H1GB H 0.145620 0.441590 0.987285 0.093 Uiso 0.498(6) 1 calc R U P A 8
 C1h C 0.2709(10) 0.3409(5) 0.9139(5) 0.114(3) Uani 0.498(6) 1 d D U P A 8
 H1HA H 0.268811 0.319017 0.943613 0.137 Uiso 0.498(6) 1 calc R U P A 8
 H1HB H 0.315426 0.358142 0.920598 0.137 Uiso 0.498(6) 1 calc R U P A 8
 C1i C 0.2660(10) 0.3159(4) 0.8587(4) 0.114(3) Uani 0.498(6) 1 d D U P A 8
 H1IA H 0.301261 0.291227 0.861319 0.137 Uiso 0.498(6) 1 calc R U P A 8
 H1IB H 0.218871 0.301925 0.850943 0.137 Uiso 0.498(6) 1 calc R U P A 8
 O7B O 0.2838(4) 0.8206(2) 0.5241(3) 0.0631(16) Uani 0.693(8) 1 d D U P F 11
 C110 C 0.2983(5) 0.8696(3) 0.6017(3) 0.062(2) Uani 0.693(8) 1 d D U P F 11
 H11G H 0.325893 0.858107 0.635041 0.075 Uiso 0.693(8) 1 calc R . P F 11
 H11H H 0.267873 0.894753 0.611057 0.075 Uiso 0.693(8) 1 calc R . P F 11
 C109 C 0.2551(5) 0.8321(3) 0.5723(4) 0.072(3) Uani 0.693(8) 1 d D U P F 11
 H10S H 0.255369 0.805132 0.595857 0.086 Uiso 0.693(8) 1 calc R . P F 11
 H10T H 0.205826 0.842247 0.563336 0.086 Uiso 0.693(8) 1 calc R . P F 11
 C111 C 0.3463(5) 0.8846(3) 0.5607(3) 0.071(2) Uani 0.693(8) 1 d D U P F 11
 H11I H 0.332589 0.914975 0.546139 0.086 Uiso 0.693(8) 1 calc R . P F 11
 H11J H 0.395954 0.885671 0.577293 0.086 Uiso 0.693(8) 1 calc R . P F 11
 C112 C 0.3368(10) 0.8517(6) 0.5200(5) 0.221(11) Uani 0.693(8) 1 d D U P F 11
 H11K H 0.327065 0.867300 0.484821 0.265 Uiso 0.693(8) 1 calc R . P F 11
 H11L H 0.381596 0.834944 0.519892 0.265 Uiso 0.693(8) 1 calc R . P F 11
 O7A O 0.2327(12) 0.8154(5) 0.5047(6) 0.102(6) Uani 0.307(8) 1 d D U P F 12
 C1j C 0.1855(15) 0.7983(9) 0.5393(8) 0.133(10) Uani 0.307(8) 1 d D U P F 12
 H1JA H 0.196313 0.766089 0.547581 0.160 Uiso 0.307(8) 1 calc R . P F 12
 H1JB H 0.136699 0.800216 0.521101 0.160 Uiso 0.307(8) 1 calc R . P F 12
 C1k C 0.1919(16) 0.8249(11) 0.5902(8) 0.151(12) Uani 0.307(8) 1 d D U P F 12
 H1KA H 0.192521 0.804661 0.621839 0.181 Uiso 0.307(8) 1 calc R . P F 12
 H1KB H 0.152259 0.846441 0.590106 0.181 Uiso 0.307(8) 1 calc R . P F 12
 C1l C 0.2599(17) 0.8495(11) 0.5912(8) 0.128(12) Uani 0.307(8) 1 d D U P F 12
 H1LA H 0.297502 0.834139 0.615273 0.153 Uiso 0.307(8) 1 calc R . P F 12
 H1LB H 0.255499 0.881088 0.603563 0.153 Uiso 0.307(8) 1 calc R . P F 12
 C1m C 0.275(2) 0.8481(16) 0.5336(10) 0.21(2) Uani 0.307(8) 1 d D U P F 12
 H1MA H 0.265670 0.878225 0.516709 0.255 Uiso 0.307(8) 1 calc R . P F 12
 H1MB H 0.325288 0.840762 0.532406 0.255 Uiso 0.307(8) 1 calc R . P F 12
 O8A O 0.4869(9) 0.3515(8) 0.7303(8) 0.096(6) Uani 0.222(8) 1 d D U P B 6
 C1n C 0.5449(11) 0.3489(9) 0.6987(11) 0.092(7) Uani 0.222(8) 1 d D U P B 6
 H1NA H 0.535846 0.325487 0.670358 0.111 Uiso 0.222(8) 1 calc R . P B 6
 H1NB H 0.588923 0.341268 0.721911 0.111 Uiso 0.222(8) 1 calc R . P B 6
 C1o C 0.5216(10) 0.4271(9) 0.7140(9) 0.082(6) Uani 0.222(8) 1 d D U P B 6
 H1OA H 0.477527 0.442001 0.698262 0.098 Uiso 0.222(8) 1 calc R . P B 6
 H1OB H 0.556276 0.450435 0.727754 0.098 Uiso 0.222(8) 1 calc R . P B 6
 C1p C 0.5079(10) 0.3931(9) 0.7591(8) 0.082(6) Uani 0.222(8) 1 d D U P B 6
 H1PA H 0.551100 0.388373 0.784559 0.098 Uiso 0.222(8) 1 calc R . P B 6
 H1PB H 0.470081 0.404241 0.779347 0.098 Uiso 0.222(8) 1 calc R . P B 6
 C1q C 0.5508(15) 0.3959(10) 0.6731(10) 0.082(6) Uani 0.222(8) 1 d D U P B 6
 H1QA H 0.600241 0.403391 0.669216 0.098 Uiso 0.222(8) 1 calc R . P B 6
 H1QB H 0.522198 0.397684 0.637344 0.098 Uiso 0.222(8) 1 calc R . P B 6
 O16A O 0.0651(9) 0.3711(4) 0.8167(5) 0.153(5) Uani 0.607(12) 1 d D U P G 13
 C133 C 0.0391(13) 0.3340(5) 0.8370(6) 0.171(8) Uani 0.607(12) 1 d D U P G 13
 H0EA H -0.012937 0.334763 0.833725 0.205 Uiso 0.607(12) 1 calc R . P G 13
 H0EB H 0.058225 0.329390 0.875267 0.205 Uiso 0.607(12) 1 calc R . P G 13
 C135 C 0.0481(10) 0.3233(4) 0.7450(4) 0.119(5) Uani 0.607(12) 1 d D U P G 13
 H3CA H 0.084672 0.319892 0.720524 0.143 Uiso 0.607(12) 1 calc R U P G 13
 H3CB H 0.001959 0.314082 0.725837 0.143 Uiso 0.607(12) 1 calc R U P G 13
 O16B O 0.1043(9) 0.3515(6) 0.8062(6) 0.118(6) Uani 0.393(12) 1 d D U P A 14
 C136 C 0.0494(18) 0.3461(10) 0.7688(11) 0.196(16) Uani 0.393(12) 1 d D U P A
 14
 H1CC H 0.063948 0.351562 0.732700 0.235 Uiso 0.393(12) 1 calc R U P G 14
 H1CD H 0.012685 0.368601 0.774636 0.235 Uiso 0.393(12) 1 calc R U P G 14
 C134 C 0.0338(13) 0.2911(9) 0.8330(10) 0.176(11) Uani 0.393(12) 1 d D U P A
 14
 H2CA H 0.035880 0.259003 0.844514 0.212 Uiso 0.393(12) 1 calc R U P G 14
 H2CB H 0.000413 0.308031 0.852765 0.212 Uiso 0.393(12) 1 calc R U P G 14
 C1r C 0.0669(13) 0.2957(4) 0.7984(5) 0.160(8) Uani 0.607(12) 1 d D U P G 13
 H7CA H 0.117973 0.289795 0.806729 0.192 Uiso 0.607(12) 1 calc R U P G 13
 H7CB H 0.040271 0.266940 0.798712 0.192 Uiso 0.607(12) 1 calc R U P G 13
 C1s C 0.0178(12) 0.2965(8) 0.7710(9) 0.136(8) Uani 0.393(12) 1 d D U P A 14
 H4CA H -0.033235 0.295423 0.758334 0.163 Uiso 0.393(12) 1 calc R U P G 14
 H4CB H 0.043177 0.274169 0.751112 0.163 Uiso 0.393(12) 1 calc R U P G 14
 C1t C 0.1081(14) 0.3138(10) 0.8377(12) 0.220(16) Uani 0.393(12) 1 d D U P A 14
 H6CA H 0.123503 0.322081 0.875756 0.264 Uiso 0.393(12) 1 calc R U P G 14
 H6CB H 0.142724 0.292260 0.825868 0.264 Uiso 0.393(12) 1 calc R U P G 14
 C1u C 0.0459(10) 0.3711(4) 0.7666(6) 0.143(6) Uani 0.607(12) 1 d D U P G 13
 H5CA H 0.077596 0.390725 0.748309 0.171 Uiso 0.607(12) 1 calc R . P G 13
 H5CB H -0.002420 0.383255 0.759123 0.171 Uiso 0.607(12) 1 calc R . P G 13
 O15A O 0.2622(10) 0.5077(6) 0.8291(10) 0.079(5) Uani 0.211(11) 1 d D U P A 9
 C129 C 0.3238(13) 0.5050(12) 0.8710(10) 0.078(5) Uani 0.211(11) 1 d D U P A
 9
 H2BA H 0.311160 0.490109 0.903965 0.093 Uiso 0.211(11) 1 calc R U P A 9
 H2BB H 0.342649 0.535579 0.880516 0.093 Uiso 0.211(11) 1 calc R U P A 9
 C131 C 0.3604(12) 0.4863(9) 0.7832(9) 0.078(6) Uani 0.211(11) 1 d D U P A 9
 H8CA H 0.344594 0.458644 0.762708 0.093 Uiso 0.211(11) 1 calc R . P A 9
 H8CB H 0.401201 0.499363 0.767789 0.093 Uiso 0.211(11) 1 calc R . P A 9
 C130 C 0.3788(13) 0.4759(11) 0.8442(10) 0.078(6) Uani 0.211(11) 1 d D U P A
 9
 H3BA H 0.427569 0.485316 0.857277 0.093 Uiso 0.211(11) 1 calc R . P A 9
 H3BB H 0.373426 0.443270 0.851661 0.093 Uiso 0.211(11) 1 calc R . P A 9
 C132 C 0.2991(13) 0.5216(9) 0.7827(10) 0.078(5) Uani 0.211(11) 1 d D U P A 9
 H1BC H 0.317791 0.552812 0.787730 0.093 Uiso 0.211(11) 1 calc R U P A 9
 H1BD H 0.267160 0.520155 0.748465 0.093 Uiso 0.211(11) 1 calc R U P A 9
 C1v C 0.3460(8) 0.4993(6) 0.8072(5) 0.203(5) Uani 0.789(11) 1 d D U P A 10
 H9CA H 0.366760 0.529800 0.804249 0.244 Uiso 0.789(11) 1 calc R U P A 10
 H9CB H 0.330942 0.487290 0.770574 0.244 Uiso 0.789(11) 1 calc R U P A 10
 O15B O 0.2884(6) 0.5000(5) 0.8399(4) 0.195(4) Uani 0.789(11) 1 d D U P A 10
 C1w C 0.3980(12) 0.4665(6) 0.8408(7) 0.243(7) Uani 0.789(11) 1 d D U P A 10
 H1DC H 0.447258 0.472873 0.834912 0.291 Uiso 0.789(11) 1 calc R U P A 10
 H1DD H 0.386906 0.434541 0.831344 0.291 Uiso 0.789(11) 1 calc R U P A 10
 C1x C 0.3216(6) 0.5086(5) 0.8938(4) 0.128(4) Uani 0.789(11) 1 d D U P A 10
 H0DA H 0.289351 0.501378 0.920745 0.154 Uiso 0.789(11) 1 calc R U P A 10
 H0DB H 0.336293 0.540638 0.898123 0.154 Uiso 0.789(11) 1 calc R U P A 10
 C1y C 0.3858(8) 0.4769(5) 0.9002(6) 0.190(5) Uani 0.789(11) 1 d D U P A 10
 H2DA H 0.375840 0.448765 0.919476 0.228 Uiso 0.789(11) 1 calc R U P A 10
 H2DB H 0.427335 0.492000 0.920006 0.228 Uiso 0.789(11) 1 calc R U P A 10
 C14B C 0.421(2) 0.7500(12) 0.6130(12) 0.090(3) Uani 0.141(7) 1 d D U P E 16
 H14D H 0.465955 0.766543 0.617664 0.136 Uiso 0.141(7) 1 calc GR . P E 16
 H14E H 0.382164 0.771621 0.609724 0.136 Uiso 0.141(7) 1 calc GR . P E 16
 H14F H 0.418596 0.731495 0.580225 0.136 Uiso 0.141(7) 1 calc GR . P E 16
 C15B C 0.402(2) 0.7565(13) 0.7020(19) 0.097(6) Uani 0.141(7) 1 d D U P E 16
 H15D H 0.443638 0.762087 0.727807 0.146 Uiso 0.141(7) 1 calc GR . P E 16
 H15E H 0.362366 0.748061 0.721577 0.146 Uiso 0.141(7) 1 calc GR . P E 16
 H15F H 0.389653 0.784050 0.680995 0.146 Uiso 0.141(7) 1 calc GR . P E 16
 C16B C 0.3492(14) 0.6884(11) 0.6493(15) 0.090(3) Uani 0.141(7) 1 d D U P E 16
 H16D H 0.359515 0.663973 0.624914 0.136 Uiso 0.141(7) 1 calc R . P E 16
 H16E H 0.334581 0.675439 0.682230 0.136 Uiso 0.141(7) 1 calc R . P E 16
 H16F H 0.311195 0.707344 0.631404 0.136 Uiso 0.141(7) 1 calc R . P E 16
 C46B C 1.1415(17) 0.6963(10) 0.7286(6) 0.054(6) Uani 0.31(2) 1 d D U P C 18
 H46D H 1.116933 0.723865 0.737443 0.081 Uiso 0.31(2) 1 calc GR . P C 18
 H46E H 1.191319 0.703150 0.727181 0.081 Uiso 0.31(2) 1 calc GR . P C 18
 H46F H 1.137298 0.673258 0.756212 0.081 Uiso 0.31(2) 1 calc GR . P C 18
 C45B C 1.1482(11) 0.6317(5) 0.6641(16) 0.085(6) Uani 0.31(2) 1 d D U P C 18
 H45D H 1.153112 0.614784 0.698123 0.127 Uiso 0.31(2) 1 calc GR . P C 18
 H45E H 1.194884 0.638419 0.653974 0.127 Uiso 0.31(2) 1 calc GR . P C 18
 H45F H 1.121590 0.613558 0.635772 0.127 Uiso 0.31(2) 1 calc GR . P C 18
 C44B C 1.1206(18) 0.7113(9) 0.6280(9) 0.082(6) Uani 0.31(2) 1 d D U P C 18
 H44D H 1.108757 0.697321 0.592449 0.122 Uiso 0.31(2) 1 calc GR . P C 18
 H44E H 1.170232 0.720206 0.632626 0.122 Uiso 0.31(2) 1 calc GR . P C 18
 H44F H 1.091171 0.738195 0.630661 0.122 Uiso 0.31(2) 1 calc GR . P C 18

loop_
  _atom_site_aniso_label
  _atom_site_aniso_U_11
  _atom_site_aniso_U_22
  _atom_site_aniso_U_33
  _atom_site_aniso_U_23
  _atom_site_aniso_U_13
  _atom_site_aniso_U_12
 Y1 0.02548(17) 0.02624(18) 0.01684(16) 0.00210(13) 0.00644(12) -0.00066(13)
 Y2 0.03395(19) 0.02889(19) 0.01892(17) 0.00071(14) 0.00836(14) 0.00082(14)
 K1 0.0640(6) 0.0399(5) 0.0450(5) 0.0102(4) 0.0116(4) 0.0230(4)
 K2 0.0837(8) 0.0639(7) 0.0344(5) 0.0067(5) -0.0008(5) -0.0007(6)
 N1 0.0320(16) 0.0374(17) 0.0175(14) 0.0017(13) 0.0072(12) -0.0070(13)
 N3 0.0269(15) 0.0299(16) 0.0226(15) 0.0043(12) 0.0094(12) 0.0015(12)
 O2 0.0465(16) 0.0371(15) 0.0360(15) 0.0056(12) 0.0090(12) 0.0129(12)
 N2 0.0268(14) 0.0258(15) 0.0189(14) 0.0029(12) 0.0062(11) 0.0006(12)
 O3 0.0573(18) 0.0460(18) 0.0485(18) 0.0170(14) 0.0088(14) 0.0098(14)
 N4 0.0350(16) 0.0386(18) 0.0218(15) 0.0003(13) 0.0078(13) -0.0028(14)
 N5 0.053(2) 0.0297(17) 0.0203(15) 0.0035(13) 0.0107(14) 0.0034(14)
 O1 0.0459(16) 0.074(2) 0.0323(15) 0.0165(15) 0.0107(13) 0.0237(15)
 N6 0.0456(18) 0.0357(18) 0.0236(16) 0.0003(13) 0.0141(14) 0.0051(14)
 O4 0.089(3) 0.0403(18) 0.0470(19) 0.0101(15) -0.0076(17) 0.0100(17)
 C69 0.0299(18) 0.031(2) 0.0239(18) 0.0024(15) 0.0094(14) 0.0020(15)
 C2 0.0349(19) 0.036(2) 0.0152(16) 0.0027(15) 0.0073(14) 0.0019(16)
 C18 0.0255(17) 0.0258(18) 0.0270(18) 0.0048(15) 0.0099(14) 0.0027(14)
 C68 0.0223(16) 0.035(2) 0.0191(17) 0.0055(15) 0.0033(13) 0.0003(14)
 O6 0.069(2) 0.093(3) 0.0412(18) 0.0244(18) 0.0158(16) 0.046(2)
 C1 0.038(2) 0.033(2) 0.0160(16) -0.0001(14) 0.0043(14) -0.0050(16)
 C17 0.0301(18) 0.033(2) 0.0241(18) 0.0025(15) 0.0085(14) -0.0001(15)
 O5 0.086(2) 0.050(2) 0.0428(18) 0.0073(15) 0.0028(16) 0.0293(18)
 C19 0.040(2) 0.031(2) 0.035(2) 0.0030(17) 0.0134(17) -0.0002(16)
 C78 0.0281(18) 0.0240(18) 0.0237(17) 0.0066(14) 0.0028(14) 0.0012(14)
 C57 0.040(2) 0.038(2) 0.0201(18) -0.0023(16) 0.0038(15) -0.0030(17)
 C77 0.0257(17) 0.0299(19) 0.0187(17) 0.0047(14) 0.0053(13) -0.0003(14)
 C3 0.0311(18) 0.0313(19) 0.0164(16) 0.0010(14) 0.0099(14) 0.0011(15)
 C4 0.0328(19) 0.038(2) 0.0215(18) 0.0001(15) 0.0103(15) -0.0024(16)
 C22 0.053(2) 0.038(2) 0.027(2) 0.0074(17) 0.0053(17) 0.0007(18)
 C5 0.040(2) 0.0299(19) 0.0175(17) -0.0001(14) 0.0077(15) -0.0015(16)
 C67 0.0266(17) 0.034(2) 0.0189(17) -0.0004(14) 0.0059(14) -0.0010(15)
 C42 0.039(2) 0.036(2) 0.0196(17) -0.0059(15) 0.0066(15) -0.0053(16)
 C23 0.0299(18) 0.032(2) 0.0292(19) 0.0070(16) 0.0069(15) 0.0028(15)
 C6 0.050(2) 0.0277(19) 0.0190(17) 0.0028(15) 0.0046(16) 0.0002(17)
 C79 0.0271(18) 0.0218(18) 0.036(2) 0.0059(15) 0.0025(15) 0.0014(14)
 C12 0.058(3) 0.031(2) 0.029(2) 0.0035(16) 0.0137(18) 0.0066(18)
 C8 0.038(2) 0.034(2) 0.0257(19) 0.0043(16) 0.0132(16) 0.0024(16)
 C48 0.0228(17) 0.042(2) 0.0223(18) 0.0014(16) 0.0037(14) -0.0119(15)
 C71 0.0359(19) 0.039(2) 0.0237(18) 0.0063(16) 0.0124(15) -0.0073(16)
 C72 0.0312(18) 0.036(2) 0.0218(18) 0.0012(15) 0.0089(14) -0.0027(15)
 C20 0.064(3) 0.027(2) 0.044(2) 0.0081(18) 0.017(2) -0.0010(19)
 C70 0.0339(19) 0.033(2) 0.0270(19) 0.0037(16) 0.0081(15) -0.0063(16)
 C83 0.036(2) 0.032(2) 0.0217(18) 0.0064(15) 0.0056(15) 0.0003(16)
 C88 0.065(3) 0.026(2) 0.0220(19) -0.0003(16) 0.0078(18) -0.0024(18)
 C7 0.041(2) 0.0284(19) 0.0275(19) 0.0026(15) 0.0137(16) 0.0018(16)
 C38 0.053(2) 0.035(2) 0.0189(18) -0.0040(16) 0.0075(16) -0.0141(18)
 C62 0.063(3) 0.042(2) 0.0202(19) 0.0010(17) 0.0076(18) -0.002(2)
 C41 0.041(2) 0.051(2) 0.0234(19) -0.0090(17) 0.0055(16) -0.0094(19)
 C37 0.039(2) 0.032(2) 0.0198(17) -0.0027(15) 0.0050(15) -0.0060(16)
 C87 0.046(2) 0.038(2) 0.0254(19) 0.0059(17) 0.0178(17) 0.0013(17)
 C80 0.0298(19) 0.029(2) 0.051(3) 0.0097(18) -0.0111(18) -0.0023(16)
 C53 0.0244(17) 0.049(2) 0.0206(18) 0.0039(16) 0.0050(14) -0.0053(16)
 C84 0.031(2) 0.032(2) 0.060(3) -0.0021(19) 0.0156(18) -0.0022(16)
 C63 0.054(2) 0.032(2) 0.0212(18) -0.0024(16) 0.0107(17) -0.0024(17)
 O14A 0.025(3) 0.106(5) 0.051(3) -0.011(3) 0.010(3) -0.006(3)
 C21 0.068(3) 0.033(2) 0.038(2) 0.0131(19) 0.014(2) 0.002(2)
 C26 0.056(3) 0.032(2) 0.027(2) 0.0019(16) -0.0015(18) 0.0004(18)
 C54 0.035(2) 0.048(2) 0.033(2) 0.0089(18) 0.0020(16) -0.0068(18)
 C61 0.049(2) 0.040(2) 0.033(2) -0.0102(18) 0.0178(18) -0.0085(18)
 C58 0.0319(19) 0.036(2) 0.0222(18) -0.0003(15) 0.0085(15) -0.0023(16)
 C89 0.048(2) 0.029(2) 0.035(2) -0.0021(17) -0.0030(18) -0.0065(18)
 C82 0.054(2) 0.043(2) 0.0208(19) 0.0062(17) 0.0064(17) -0.0057(19)
 C47 0.051(2) 0.036(2) 0.0209(18) 0.0053(16) 0.0107(16) -0.0108(18)
 C56 0.0284(19) 0.055(2) 0.0229(18) 0.0070(17) 0.0067(15) -0.0019(17)
 C11 0.069(3) 0.047(3) 0.035(2) -0.004(2) 0.022(2) 0.018(2)
 C49 0.0280(18) 0.048(2) 0.0241(18) 0.0035(17) 0.0033(14) -0.0088(17)
 C86 0.037(2) 0.057(3) 0.0229(19) 0.0032(18) 0.0131(16) -0.0017(18)
 C28 0.042(2) 0.038(2) 0.0258(19) 0.0021(16) 0.0107(16) 0.0154(17)
 C39 0.062(3) 0.049(3) 0.023(2) -0.0050(18) 0.0131(19) -0.028(2)
 C9 0.037(2) 0.060(3) 0.034(2) 0.000(2) 0.0117(17) 0.0107(19)
 C81 0.055(3) 0.044(2) 0.026(2) 0.0081(18) -0.0078(18) -0.010(2)
 O13B 0.210(7) 0.088(4) 0.040(2) 0.005(2) 0.000(3) 0.065(4)
 C32 0.051(3) 0.085(4) 0.024(2) -0.001(2) 0.0119(19) 0.019(2)
 C33 0.041(2) 0.050(2) 0.027(2) 0.0022(18) 0.0088(17) 0.0181(19)
 C52 0.030(2) 0.071(3) 0.0233(19) 0.0102(19) 0.0070(15) -0.0005(19)
 C60 0.043(2) 0.029(2) 0.050(3) -0.0037(19) 0.0076(19) -0.0009(17)
 C94 0.042(2) 0.045(2) 0.042(2) 0.0002(19) 0.0066(18) -0.0016(19)
 C27 0.063(3) 0.032(2) 0.028(2) -0.0039(17) 0.0114(19) 0.0045(19)
 C97 0.054(3) 0.060(3) 0.035(2) 0.017(2) 0.0061(19) 0.011(2)
 C36 0.040(2) 0.074(3) 0.024(2) -0.004(2) 0.0028(17) 0.017(2)
 C40 0.053(2) 0.052(3) 0.027(2) -0.0134(18) 0.0145(18) -0.026(2)
 C99 0.056(3) 0.046(3) 0.047(3) 0.015(2) 0.014(2) 0.025(2)
 C50 0.0272(19) 0.064(3) 0.038(2) 0.011(2) 0.0069(17) 0.0068(19)
 C73 0.060(3) 0.037(2) 0.031(2) 0.0103(17) 0.0157(19) -0.0016(19)
 C25 0.073(3) 0.030(2) 0.043(2) -0.0026(18) 0.009(2) -0.002(2)
 C59 0.042(2) 0.033(2) 0.039(2) 0.0018(18) 0.0006(17) -0.0071(17)
 C51 0.030(2) 0.079(3) 0.032(2) 0.010(2) 0.0137(17) 0.006(2)
 C34 0.052(3) 0.055(3) 0.046(3) -0.011(2) 0.020(2) -0.008(2)
 C29 0.046(2) 0.043(2) 0.034(2) -0.0012(18) 0.0149(18) 0.0090(19)
 C98 0.054(3) 0.038(2) 0.035(2) 0.0093(18) 0.0025(19) 0.0094(19)
 O11B 0.085(5) 0.046(3) 0.050(4) -0.010(3) 0.023(4) -0.009(3)
 C10 0.054(3) 0.071(3) 0.038(2) -0.002(2) 0.017(2) 0.025(2)
 C31 0.051(3) 0.085(4) 0.038(3) 0.004(2) 0.024(2) 0.011(3)
 C100 0.051(3) 0.058(3) 0.067(3) 0.027(3) 0.011(2) 0.017(2)
 C66 0.103(4) 0.036(2) 0.025(2) -0.0001(18) -0.004(2) 0.007(2)
 C30 0.051(3) 0.063(3) 0.044(3) 0.000(2) 0.022(2) 0.003(2)
 C55 0.042(3) 0.118(5) 0.048(3) 0.026(3) 0.026(2) 0.022(3)
 C93 0.096(4) 0.042(2) 0.024(2) -0.0019(19) 0.015(2) 0.009(2)
 C107 0.060(3) 0.116(5) 0.041(3) 0.023(3) 0.018(2) 0.047(3)
 C106 0.078(4) 0.105(5) 0.042(3) 0.030(3) 0.018(3) 0.060(4)
 C64 0.094(4) 0.038(3) 0.067(3) 0.013(2) -0.028(3) -0.018(3)
 C90 0.058(3) 0.053(3) 0.043(3) 0.004(2) -0.010(2) 0.000(2)
 C101 0.070(3) 0.053(3) 0.073(4) 0.020(3) 0.000(3) 0.001(3)
 C65 0.092(4) 0.054(3) 0.038(3) -0.017(2) 0.023(2) -0.008(3)
 C92 0.117(5) 0.069(3) 0.023(2) 0.004(2) 0.010(3) 0.003(3)
 O12B 0.056(4) 0.054(4) 0.043(3) 0.011(2) -0.005(3) 0.007(3)
 C108 0.055(3) 0.096(4) 0.048(3) 0.024(3) 0.019(2) 0.033(3)
 C85 0.085(4) 0.087(4) 0.035(3) 0.004(3) -0.017(2) -0.021(3)
 C102 0.083(4) 0.054(3) 0.062(3) 0.019(3) 0.007(3) -0.003(3)
 C91 0.089(4) 0.074(4) 0.038(3) 0.014(3) -0.010(3) 0.010(3)
 C24 0.150(6) 0.043(3) 0.045(3) 0.022(2) 0.021(3) 0.002(3)
 C35 0.075(4) 0.154(6) 0.050(3) 0.004(4) 0.038(3) -0.004(4)
 C103 0.095(4) 0.048(3) 0.074(4) 0.028(3) -0.021(3) 0.000(3)
 C114 0.066(5) 0.081(4) 0.063(5) -0.013(4) 0.021(4) -0.027(4)
 C105 0.112(5) 0.078(4) 0.046(3) 0.012(3) 0.001(3) 0.062(4)
 C104 0.121(5) 0.039(3) 0.085(4) 0.017(3) -0.025(4) 0.018(3)
 C125 0.068(6) 0.099(7) 0.039(3) 0.013(3) 0.005(4) -0.004(4)
 O9A 0.081(5) 0.051(4) 0.138(5) 0.001(4) -0.008(4) 0.005(3)
 C96 0.135(5) 0.067(3) 0.038(3) 0.011(2) 0.044(3) 0.036(3)
 C46A 0.053(5) 0.116(9) 0.044(3) -0.009(4) 0.018(3) -0.033(6)
 C76A 0.052(5) 0.034(4) 0.037(4) 0.015(3) 0.009(4) 0.007(4)
 C13 0.077(3) 0.136(4) 0.060(3) -0.020(3) 0.012(2) 0.061(3)
 C126 0.062(6) 0.127(9) 0.050(4) 0.001(5) 0.008(4) -0.005(5)
 C43 0.055(3) 0.090(3) 0.040(2) -0.016(2) 0.0198(17) -0.038(2)
 O8B 0.145(6) 0.164(6) 0.153(8) -0.030(6) 0.099(6) -0.041(5)
 C127 0.044(5) 0.134(10) 0.115(6) -0.031(6) 0.022(5) 0.015(5)
 O10A 0.099(5) 0.112(6) 0.093(4) 0.063(4) -0.033(4) -0.025(4)
 C44A 0.068(6) 0.098(4) 0.043(5) -0.007(4) 0.023(4) -0.046(4)
 C15A 0.083(4) 0.131(4) 0.166(9) -0.016(4) 0.003(4) 0.073(3)
 C14A 0.070(4) 0.195(8) 0.075(3) -0.038(5) 0.003(3) 0.079(4)
 C115 0.048(4) 0.097(4) 0.077(5) -0.034(4) 0.017(3) -0.022(3)
 C95 0.143(7) 0.163(8) 0.062(4) 0.046(5) -0.022(4) 0.040(6)
 C116 0.062(4) 0.161(6) 0.057(4) -0.028(5) 0.020(3) -0.027(4)
 C74A 0.078(7) 0.048(5) 0.113(11) 0.047(6) 0.060(7) 0.038(5)
 C121 0.086(6) 0.062(5) 0.044(4) -0.012(4) 0.018(4) -0.006(4)
 C45A 0.071(6) 0.106(5) 0.057(6) -0.022(5) 0.036(5) -0.034(4)
 C75A 0.172(14) 0.026(4) 0.042(6) 0.007(4) -0.027(7) -0.021(6)
 C128 0.043(6) 0.120(9) 0.142(6) -0.021(5) 0.010(5) 0.018(6)
 C113 0.102(6) 0.128(6) 0.081(6) 0.005(5) 0.032(5) -0.042(5)
 C124 0.159(9) 0.050(6) 0.046(3) 0.011(4) 0.003(5) 0.020(6)
 C16A 0.093(5) 0.226(8) 0.076(3) 0.008(5) 0.029(3) 0.077(6)
 C123 0.079(7) 0.050(5) 0.048(4) 0.010(3) -0.001(4) 0.011(4)
 C122 0.051(5) 0.073(5) 0.052(3) -0.002(3) 0.008(3) -0.005(4)
 C74B 0.18(2) 0.018(6) 0.048(9) 0.006(6) 0.049(13) 0.020(9)
 C75B 0.106(13) 0.040(9) 0.16(2) 0.036(11) 0.026(13) -0.007(8)
 C76B 0.19(3) 0.061(13) 0.041(8) 0.004(8) 0.005(13) 0.081(16)
 O12A 0.097(6) 0.096(7) 0.069(4) -0.014(4) 0.021(4) 0.015(4)
 C14 0.128(9) 0.075(6) 0.035(4) -0.009(3) -0.016(4) 0.022(5)
 O10B 0.187(5) 0.076(3) 0.0356(18) -0.0060(16) -0.008(2) 0.048(3)
 C15 0.133(8) 0.142(11) 0.052(5) -0.032(6) 0.013(5) -0.017(7)
 C16 0.130(11) 0.064(6) 0.035(3) 0.009(3) 0.001(5) 0.018(6)
 O11A 0.127(7) 0.187(9) 0.038(3) 0.017(4) 0.012(4) -0.009(6)
 O9B 0.187(5) 0.076(3) 0.0356(18) -0.0060(16) -0.008(2) 0.048(3)
 O13A 0.061(4) 0.053(4) 0.050(3) 0.015(3) -0.008(3) -0.011(3)
 C1a 0.075(8) 0.104(8) 0.091(5) 0.001(5) 0.014(5) 0.012(5)
 C1b 0.183(13) 0.068(6) 0.037(3) -0.010(3) -0.006(5) 0.035(6)
 O14B 0.187(5) 0.076(3) 0.0356(18) -0.0060(16) -0.008(2) 0.048(3)
 C1c 0.130(11) 0.130(10) 0.077(4) -0.028(5) 0.037(6) -0.004(7)
 C1d 0.148(8) 0.071(7) 0.031(4) -0.010(4) -0.021(4) 0.026(5)
 C1e 0.089(6) 0.093(9) 0.083(5) 0.014(5) 0.010(5) 0.023(6)
 C120 0.128(9) 0.258(15) 0.056(6) 0.067(8) -0.014(6) -0.013(8)
 C119 0.125(9) 0.192(12) 0.085(4) 0.063(6) -0.019(6) -0.028(7)
 C117 0.100(10) 0.087(8) 0.177(6) 0.041(5) -0.025(6) -0.002(6)
 C118 0.121(7) 0.080(8) 0.155(6) 0.066(6) -0.017(6) -0.011(6)
 C1f 0.161(11) 0.073(6) 0.031(3) 0.000(3) 0.016(5) 0.010(6)
 C1g 0.146(9) 0.056(5) 0.035(5) -0.009(3) 0.023(5) -0.007(4)
 C1h 0.210(7) 0.088(4) 0.040(2) 0.005(2) 0.000(3) 0.065(4)
 C1i 0.210(7) 0.088(4) 0.040(2) 0.005(2) 0.000(3) 0.065(4)
 O7B 0.086(4) 0.060(3) 0.046(4) -0.021(3) 0.022(3) -0.007(3)
 C110 0.103(6) 0.046(4) 0.042(4) -0.006(3) 0.028(4) 0.009(4)
 C109 0.103(6) 0.055(5) 0.066(6) -0.016(4) 0.043(4) -0.002(4)
 C111 0.102(6) 0.072(5) 0.044(4) -0.017(3) 0.027(4) -0.013(4)
 C112 0.321(17) 0.247(14) 0.131(10) -0.146(11) 0.174(12) -0.214(14)
 O7A 0.194(19) 0.073(10) 0.041(7) 0.000(6) 0.017(8) 0.015(11)
 C1j 0.22(2) 0.133(18) 0.049(10) 0.001(10) 0.031(12) -0.009(15)
 C1k 0.25(3) 0.15(2) 0.050(10) -0.007(12) 0.038(13) -0.027(18)
 C1l 0.23(3) 0.12(3) 0.035(9) -0.007(11) 0.031(12) 0.004(18)
 C1m 0.35(4) 0.25(4) 0.047(11) -0.066(19) 0.069(18) -0.14(4)
 O8A 0.051(9) 0.162(16) 0.077(11) 0.018(9) 0.014(7) 0.020(9)
 C1n 0.045(11) 0.171(16) 0.061(12) 0.034(10) 0.005(9) 0.040(12)
 C1o 0.015(6) 0.165(15) 0.063(9) 0.022(8) -0.008(5) 0.024(7)
 C1p 0.015(6) 0.165(15) 0.063(9) 0.022(8) -0.008(5) 0.024(7)
 C1q 0.015(6) 0.165(15) 0.063(9) 0.022(8) -0.008(5) 0.024(7)
 O16A 0.268(13) 0.081(5) 0.129(7) -0.012(5) 0.097(9) -0.027(7)
 C133 0.33(2) 0.090(6) 0.111(7) -0.023(6) 0.108(11) -0.052(9)
 C135 0.199(14) 0.071(6) 0.103(6) 0.000(4) 0.080(8) 0.011(7)
 O16B 0.124(10) 0.125(10) 0.102(11) 0.045(8) 0.004(7) -0.061(8)
 C136 0.19(2) 0.166(16) 0.203(19) 0.095(16) -0.080(17) -0.103(15)
 C134 0.199(17) 0.155(19) 0.173(17) 0.043(14) 0.015(12) -0.111(15)
 C1r 0.32(2) 0.081(5) 0.094(8) 0.000(5) 0.074(10) -0.006(9)
 C1s 0.104(14) 0.136(14) 0.168(16) 0.012(13) 0.018(11) -0.055(11)
 C1t 0.201(17) 0.197(17) 0.23(2) 0.143(18) -0.085(17) -0.128(15)
 C1u 0.246(16) 0.071(5) 0.131(7) -0.010(5) 0.100(9) -0.017(7)
 O15A 0.072(7) 0.060(6) 0.106(12) -0.023(7) 0.020(6) 0.011(5)
 C129 0.068(7) 0.057(7) 0.110(11) -0.024(6) 0.019(6) 0.002(5)
 C131 0.065(9) 0.058(10) 0.111(12) -0.028(8) 0.017(7) 0.002(7)
 C130 0.065(9) 0.058(10) 0.111(12) -0.028(8) 0.017(7) 0.002(7)
 C132 0.068(7) 0.057(7) 0.110(11) -0.024(6) 0.019(6) 0.002(5)
 C1v 0.238(11) 0.254(17) 0.138(7) -0.069(8) 0.100(8) -0.155(8)
 O15B 0.187(7) 0.313(10) 0.091(5) -0.077(6) 0.047(4) -0.169(7)
 C1w 0.371(16) 0.153(14) 0.248(11) -0.059(10) 0.209(12) -0.041(11)
 C1x 0.151(8) 0.136(8) 0.097(5) -0.060(6) 0.015(5) -0.028(5)
 C1y 0.249(11) 0.144(11) 0.201(9) -0.001(8) 0.127(8) 0.040(9)
 C14B 0.075(6) 0.135(6) 0.063(5) -0.020(4) 0.015(4) 0.062(5)
 C15B 0.094(16) 0.133(7) 0.069(7) -0.021(5) 0.028(12) 0.052(9)
 C16B 0.075(6) 0.135(6) 0.063(5) -0.020(4) 0.015(4) 0.062(5)
 C46B 0.049(14) 0.072(11) 0.042(4) -0.006(6) 0.013(5) -0.036(9)
 C45B 0.072(11) 0.093(6) 0.092(14) -0.034(6) 0.024(12) -0.034(6)
 C44B 0.067(13) 0.136(12) 0.049(8) 0.013(9) 0.037(9) -0.011(11)

_geom_special_details
;
 All esds (except the esd in the dihedral angle between two l.s. planes)
 are estimated using the full covariance matrix.  The cell esds are taken
 into account individually in the estimation of esds in distances, angles
 and torsion angles; correlations between esds in cell parameters are only
 used when they are defined by crystal symmetry.  An approximate (isotropic)
 treatment of cell esds is used for estimating esds involving l.s. planes.
;
loop_
  _geom_bond_atom_site_label_1
  _geom_bond_atom_site_label_2
  _geom_bond_distance
  _geom_bond_site_symmetry_2
  _geom_bond_publ_flag
 Y1 N1 2.250(3) . ?
 Y1 N3 2.252(3) . ?
 Y1 N2 2.260(3) . ?
 Y1 C2 2.649(3) . ?
 Y1 C1 2.686(3) . ?
 Y1 C3 2.705(3) . ?
 Y1 C4 2.691(3) . ?
 Y1 C5 2.740(3) . ?
 Y1 C6 2.727(4) . ?
 Y2 N4 2.251(3) . ?
 Y2 N5 2.239(3) . ?
 Y2 N6 2.242(3) . ?
 Y2 C2 2.633(3) . ?
 Y2 C1 2.649(3) . ?
 Y2 C3 2.689(3) . ?
 Y2 C4 2.780(4) . ?
 Y2 C5 2.753(3) . ?
 Y2 C6 2.673(3) . ?
 K1 O2 2.771(3) . ?
 K1 O3 2.803(3) . ?
 K1 O1 2.838(3) . ?
 K1 O4 2.818(4) . ?
 K1 O6 2.785(4) . ?
 K1 O5 2.840(3) . ?
 K1 C75A 3.304(10) 3_666 ?
 K1 C74B 3.438(18) 3_666 ?
 K1 O7B 2.790(6) . ?
 K1 O7A 2.475(14) . ?
 K2 O14A 2.784(9) . ?
 K2 O13B 2.817(14) . ?
 K2 O10A 2.801(9) . ?
 K2 O12A 2.600(10) . ?
 K2 O10B 2.804(8) . ?
 K2 O11A 2.696(10) . ?
 K2 O9B 2.681(9) . ?
 K2 O13A 2.782(11) . ?
 K2 O14B 2.692(11) . ?
 K2 O16B 2.681(12) . ?
 K2 O15A 2.773(18) . ?
 K2 O15B 2.863(9) . ?
 N1 C48 1.419(4) . ?
 N1 C47 1.474(5) . ?
 N3 C18 1.418(4) . ?
 N3 C17 1.476(4) . ?
 O2 C99 1.422(5) . ?
 O2 C98 1.425(5) . ?
 N2 C78 1.414(4) . ?
 N2 C77 1.475(4) . ?
 O3 C100 1.423(5) . ?
 O3 C101 1.418(6) . ?
 N4 C57 1.469(5) . ?
 N4 C58 1.409(5) . ?
 N5 C88 1.423(5) . ?
 N5 C87 1.479(5) . ?
 O1 C97 1.424(5) . ?
 O1 C108 1.430(5) . ?
 N6 C28 1.418(5) . ?
 N6 C27 1.467(5) . ?
 O4 C102 1.429(6) . ?
 O4 C103 1.424(5) . ?
 C69 H69 0.9300 . ?
 C69 C68 1.394(5) . ?
 C69 C70 1.395(5) . ?
 C2 H4 0.9300 . ?
 C2 C1 1.447(5) . ?
 C2 C3 1.407(5) . ?
 C18 C19 1.403(5) . ?
 C18 C23 1.411(5) . ?
 C68 C77 1.533(4) . ?
 C68 C67 1.407(5) . ?
 O6 C107 1.404(7) . ?
 O6 C106 1.421(5) . ?
 C1 C6 1.475(5) . ?
 C1 C37 1.475(5) . ?
 C17 H17A 0.9700 . ?
 C17 H17B 0.9700 . ?
 C17 C8 1.526(5) . ?
 O5 C105 1.408(6) . ?
 O5 C104 1.422(7) . ?
 C19 C20 1.392(5) . ?
 C19 C25 1.508(6) . ?
 C78 C79 1.409(5) . ?
 C78 C83 1.421(5) . ?
 C57 H57A 0.9700 . ?
 C57 H57B 0.9700 . ?
 C57 C42 1.526(5) . ?
 C77 H77A 0.9700 . ?
 C77 H77B 0.9700 . ?
 C3 C4 1.486(5) . ?
 C3 C67 1.480(5) . ?
 C4 H6 0.9300 . ?
 C4 C5 1.432(5) . ?
 C22 H22 0.9300 . ?
 C22 C23 1.391(5) . ?
 C22 C21 1.380(6) . ?
 C5 C6 1.405(5) . ?
 C5 C7 1.498(5) . ?
 C67 C72 1.416(5) . ?
 C42 C41 1.395(5) . ?
 C42 C37 1.413(5) . ?
 C23 C26 1.497(5) . ?
 C6 H2 0.9300 . ?
 C79 C80 1.404(5) . ?
 C79 C84 1.500(5) . ?
 C12 C7 1.417(5) . ?
 C12 C11 1.390(6) . ?
 C12 C27 1.526(6) . ?
 C8 C7 1.395(5) . ?
 C8 C9 1.396(5) . ?
 C48 C53 1.421(5) . ?
 C48 C49 1.403(5) . ?
 C71 H71 0.9300 . ?
 C71 C72 1.389(5) . ?
 C71 C70 1.382(5) . ?
 C72 C87 1.517(5) . ?
 C20 H20 0.9300 . ?
 C20 C21 1.373(6) . ?
 C70 C73 1.539(5) . ?
 C83 C82 1.390(5) . ?
 C83 C86 1.507(5) . ?
 C88 C89 1.401(6) . ?
 C88 C93 1.421(5) . ?
 C38 C37 1.416(5) . ?
 C38 C47 1.520(5) . ?
 C38 C39 1.381(5) . ?
 C62 H62 0.9300 . ?
 C62 C63 1.392(5) . ?
 C62 C61 1.375(6) . ?
 C41 H41 0.9300 . ?
 C41 C40 1.393(5) . ?
 C87 H87A 0.9700 . ?
 C87 H87B 0.9700 . ?
 C80 H80 0.9300 . ?
 C80 C81 1.385(6) . ?
 C53 C56 1.499(5) . ?
 C53 C52 1.393(5) . ?
 C84 H84A 0.9600 . ?
 C84 H84B 0.9600 . ?
 C84 H84C 0.9600 . ?
 C63 C58 1.404(5) . ?
 C63 C66 1.509(5) . ?
 O14A C126 1.393(11) . ?
 O14A C127 1.402(10) . ?
 C21 C24 1.515(6) . ?
 C26 H26A 0.9600 . ?
 C26 H26B 0.9600 . ?
 C26 H26C 0.9600 . ?
 C54 H54A 0.9600 . ?
 C54 H54B 0.9600 . ?
 C54 H54C 0.9600 . ?
 C54 C49 1.507(5) . ?
 C61 C60 1.377(6) . ?
 C61 C65 1.518(6) . ?
 C58 C59 1.407(5) . ?
 C89 C94 1.497(6) . ?
 C89 C90 1.393(6) . ?
 C82 H82 0.9300 . ?
 C82 C81 1.377(6) . ?
 C47 H47A 0.9700 . ?
 C47 H47B 0.9700 . ?
 C56 H56A 0.9600 . ?
 C56 H56B 0.9600 . ?
 C56 H56C 0.9600 . ?
 C11 H11 0.9300 . ?
 C11 C10 1.378(6) . ?
 C49 C50 1.393(5) . ?
 C86 H86A 0.9600 . ?
 C86 H86B 0.9600 . ?
 C86 H86C 0.9600 . ?
 C28 C33 1.416(5) . ?
 C28 C29 1.397(6) . ?
 C39 H39 0.9300 . ?
 C39 C40 1.390(6) . ?
 C9 H9 0.9300 . ?
 C9 C10 1.392(6) . ?
 C81 C85 1.515(6) . ?
 O13B C124 1.37(2) . ?
 O13B C16 1.417(11) . ?
 C32 H32 0.9300 . ?
 C32 C33 1.387(6) . ?
 C32 C31 1.377(7) . ?
 C33 C36 1.504(6) . ?
 C52 H52 0.9300 . ?
 C52 C51 1.381(6) . ?
 C60 H60 0.9300 . ?
 C60 C59 1.393(6) . ?
 C94 H94A 0.9600 . ?
 C94 H94B 0.9600 . ?
 C94 H94C 0.9600 . ?
 C27 H27A 0.9700 . ?
 C27 H27B 0.9700 . ?
 C97 H97A 0.9700 . ?
 C97 H97B 0.9700 . ?
 C97 C98 1.488(6) . ?
 C36 H36A 0.9600 . ?
 C36 H36B 0.9600 . ?
 C36 H36C 0.9600 . ?
 C40 C43 1.533(6) . ?
 C99 H99A 0.9700 . ?
 C99 H99B 0.9700 . ?
 C99 C100 1.491(7) . ?
 C50 H50 0.9300 . ?
 C50 C51 1.390(6) . ?
 C73 C76A 1.507(8) . ?
 C73 C74A 1.604(8) . ?
 C73 C75A 1.487(8) . ?
 C73 C74B 1.455(10) . ?
 C73 C75B 1.562(12) . ?
 C73 C76B 1.476(12) . ?
 C25 H25A 0.9600 . ?
 C25 H25B 0.9600 . ?
 C25 H25C 0.9600 . ?
 C59 C64 1.504(6) . ?
 C51 C55 1.524(5) . ?
 C34 H34A 0.9600 . ?
 C34 H34B 0.9600 . ?
 C34 H34C 0.9600 . ?
 C34 C29 1.505(6) . ?
 C29 C30 1.402(6) . ?
 C98 H98A 0.9700 . ?
 C98 H98B 0.9700 . ?
 O11B C121 1.384(11) . ?
 O11B C1g 1.407(10) . ?
 C10 C13 1.526(6) . ?
 C31 C30 1.383(7) . ?
 C31 C35 1.521(6) . ?
 C100 H10A 0.9700 . ?
 C100 H10B 0.9700 . ?
 C66 H66A 0.9600 . ?
 C66 H66B 0.9600 . ?
 C66 H66C 0.9600 . ?
 C30 H30 0.9300 . ?
 C55 H55A 0.9600 . ?
 C55 H55B 0.9600 . ?
 C55 H55C 0.9600 . ?
 C93 C92 1.392(7) . ?
 C93 C96 1.489(7) . ?
 C107 H10C 0.9700 . ?
 C107 H10D 0.9700 . ?
 C107 C108 1.494(6) . ?
 C106 H10E 0.9700 . ?
 C106 H10F 0.9700 . ?
 C106 C105 1.486(9) . ?
 C64 H64A 0.9600 . ?
 C64 H64B 0.9600 . ?
 C64 H64C 0.9600 . ?
 C90 H90 0.9300 . ?
 C90 C91 1.370(7) . ?
 C101 H10G 0.9700 . ?
 C101 H10H 0.9700 . ?
 C101 C102 1.500(7) . ?
 C65 H65A 0.9600 . ?
 C65 H65B 0.9600 . ?
 C65 H65C 0.9600 . ?
 C92 H92 0.9300 . ?
 C92 C91 1.373(8) . ?
 O12B C123 1.401(10) . ?
 O12B C122 1.368(9) . ?
 C108 H10I 0.9700 . ?
 C108 H10J 0.9700 . ?
 C85 H85A 0.9600 . ?
 C85 H85B 0.9600 . ?
 C85 H85C 0.9600 . ?
 C102 H10K 0.9700 . ?
 C102 H10L 0.9700 . ?
 C91 C95 1.522(7) . ?
 C24 H24A 0.9600 . ?
 C24 H24B 0.9600 . ?
 C24 H24C 0.9600 . ?
 C35 H35A 0.9600 . ?
 C35 H35B 0.9600 . ?
 C35 H35C 0.9600 . ?
 C103 H10M 0.9700 . ?
 C103 H10N 0.9700 . ?
 C103 C104 1.479(8) . ?
 C114 H11M 0.9700 . ?
 C114 H11N 0.9700 . ?
 C114 C115 1.520(9) . ?
 C114 C113 1.509(9) . ?
 C105 H10O 0.9700 . ?
 C105 H10P 0.9700 . ?
 C104 H10Q 0.9700 . ?
 C104 H10R 0.9700 . ?
 C125 H12A 0.9700 . ?
 C125 H12B 0.9700 . ?
 C125 C126 1.513(12) . ?
 C125 O13A 1.438(11) . ?
 O9A C128 1.354(12) . ?
 O9A C117 1.444(12) . ?
 C96 H96A 0.9600 . ?
 C96 H96B 0.9600 . ?
 C96 H96C 0.9600 . ?
 C46A H46A 0.9600 . ?
 C46A H46B 0.9600 . ?
 C46A H46C 0.9600 . ?
 C46A C43 1.494(9) . ?
 C76A H76A 0.9600 . ?
 C76A H76B 0.9600 . ?
 C76A H76C 0.9600 . ?
 C13 C15A 1.521(9) . ?
 C13 C14A 1.483(8) . ?
 C13 C16A 1.560(8) . ?
 C13 C14B 1.565(15) . ?
 C13 C15B 1.499(15) . ?
 C13 C16B 1.533(15) . ?
 C126 H12C 0.9700 . ?
 C126 H12D 0.9700 . ?
 C43 C44A 1.544(8) . ?
 C43 C45A 1.548(8) . ?
 C43 C46B 1.558(12) . ?
 C43 C45B 1.557(12) . ?
 C43 C44B 1.483(12) . ?
 O8B C116 1.278(10) . ?
 O8B C113 1.490(10) . ?
 C127 H12E 0.9700 . ?
 C127 H12F 0.9700 . ?
 C127 C128 1.473(13) . ?
 O10A C119 1.402(12) . ?
 O10A C118 1.375(12) . ?
 C44A H44A 0.9600 . ?
 C44A H44B 0.9600 . ?
 C44A H44C 0.9600 . ?
 C15A H15A 0.9600 . ?
 C15A H15B 0.9600 . ?
 C15A H15C 0.9600 . ?
 C14A H14A 0.9600 . ?
 C14A H14B 0.9600 . ?
 C14A H14C 0.9600 . ?
 C115 H11O 0.9700 . ?
 C115 H11P 0.9700 . ?
 C115 C116 1.437(9) . ?
 C95 H95A 0.9600 . ?
 C95 H95B 0.9600 . ?
 C95 H95C 0.9600 . ?
 C116 H11Q 0.9700 . ?
 C116 H11R 0.9700 . ?
 C74A H74A 0.9600 . ?
 C74A H74B 0.9600 . ?
 C74A H74C 0.9600 . ?
 C121 H12G 0.9700 . ?
 C121 H12H 0.9700 . ?
 C121 C122 1.516(11) . ?
 C45A H45A 0.9600 . ?
 C45A H45B 0.9600 . ?
 C45A H45C 0.9600 . ?
 C75A H75A 0.9600 . ?
 C75A H75B 0.9600 . ?
 C75A H75C 0.9600 . ?
 C128 H12I 0.9700 . ?
 C128 H12J 0.9700 . ?
 C113 H11S 0.9700 . ?
 C113 H11T 0.9700 . ?
 C124 H12K 0.9700 . ?
 C124 H12L 0.9700 . ?
 C124 C123 1.508(11) . ?
 C16A H16A 0.9600 . ?
 C16A H16B 0.9600 . ?
 C16A H16C 0.9600 . ?
 C123 H12M 0.9700 . ?
 C123 H12N 0.9700 . ?
 C122 H12O 0.9700 . ?
 C122 H12P 0.9700 . ?
 C74B H74D 0.9600 . ?
 C74B H74E 0.9600 . ?
 C74B H74F 0.9600 . ?
 C75B H75D 0.9600 . ?
 C75B H75E 0.9600 . ?
 C75B H75F 0.9600 . ?
 C76B H76D 0.9600 . ?
 C76B H76E 0.9600 . ?
 C76B H76F 0.9600 . ?
 O12A C1a 1.367(12) . ?
 O12A C1c 1.379(11) . ?
 C14 H14G 0.9700 . ?
 C14 H14H 0.9700 . ?
 C14 C16 1.468(12) . ?
 C14 O14B 1.352(11) . ?
 O10B C1f 1.374(11) . ?
 O10B C1h 1.426(11) . ?
 C15 H15G 0.9700 . ?
 C15 H15H 0.9700 . ?
 C15 O11A 1.368(12) . ?
 C15 C1c 1.512(14) . ?
 C16 H16G 0.9700 . ?
 C16 H16H 0.9700 . ?
 O11A C120 1.374(13) . ?
 O9B C1b 1.417(10) . ?
 O9B C1i 1.393(11) . ?
 O13A C1e 1.480(16) . ?
 C1a H1AA 0.9700 . ?
 C1a H1AB 0.9700 . ?
 C1a C1e 1.474(13) . ?
 C1b H1BA 0.9700 . ?
 C1b H1BB 0.9700 . ?
 C1b C1d 1.499(12) . ?
 O14B C1d 1.411(11) . ?
 C1c H1CA 0.9700 . ?
 C1c H1CB 0.9700 . ?
 C1d H1DA 0.9700 . ?
 C1d H1DB 0.9700 . ?
 C1e H1EA 0.9700 . ?
 C1e H1EB 0.9700 . ?
 C120 H12Q 0.9700 . ?
 C120 H12R 0.9700 . ?
 C120 C119 1.48(3) . ?
 C119 H11A 0.9700 . ?
 C119 H11B 0.9700 . ?
 C117 H11C 0.9700 . ?
 C117 H11D 0.9700 . ?
 C117 C118 1.495(13) . ?
 C118 H11E 0.9700 . ?
 C118 H11F 0.9700 . ?
 C1f H1FA 0.9700 . ?
 C1f H1FB 0.9700 . ?
 C1f C1g 1.503(13) . ?
 C1g H1GA 0.9700 . ?
 C1g H1GB 0.9700 . ?
 C1h H1HA 0.9700 . ?
 C1h H1HB 0.9700 . ?
 C1h C1i 1.525(12) . ?
 C1i H1IA 0.9700 . ?
 C1i H1IB 0.9700 . ?
 O7B C109 1.395(8) . ?
 O7B C112 1.354(10) . ?
 C110 H11G 0.9700 . ?
 C110 H11H 0.9700 . ?
 C110 C109 1.485(10) . ?
 C110 C111 1.493(9) . ?
 C109 H10S 0.9700 . ?
 C109 H10T 0.9700 . ?
 C111 H11I 0.9700 . ?
 C111 H11J 0.9700 . ?
 C111 C112 1.374(10) . ?
 C112 H11K 0.9700 . ?
 C112 H11L 0.9700 . ?
 O7A C1j 1.388(15) . ?
 O7A C1m 1.375(16) . ?
 C1j H1JA 0.9700 . ?
 C1j H1JB 0.9700 . ?
 C1j C1k 1.456(15) . ?
 C1k H1KA 0.9700 . ?
 C1k H1KB 0.9700 . ?
 C1k C1l 1.459(15) . ?
 C1l H1LA 0.9700 . ?
 C1l H1LB 0.9700 . ?
 C1l C1m 1.473(14) . ?
 C1m H1MA 0.9700 . ?
 C1m H1MB 0.9700 . ?
 O8A C1n 1.413(16) . ?
 O8A C1p 1.426(17) . ?
 C1n H1NA 0.9700 . ?
 C1n H1NB 0.9700 . ?
 C1n C1q 1.505(15) . ?
 C1o H1OA 0.9700 . ?
 C1o H1OB 0.9700 . ?
 C1o C1p 1.520(16) . ?
 C1o C1q 1.501(15) . ?
 C1p H1PA 0.9700 . ?
 C1p H1PB 0.9700 . ?
 C1q H1QA 0.9700 . ?
 C1q H1QB 0.9700 . ?
 O16A C133 1.303(12) . ?
 O16A C1u 1.235(13) . ?
 C133 H0EA 0.9700 . ?
 C133 H0EB 0.9700 . ?
 C133 C1r 1.585(13) . ?
 C135 H3CA 0.9700 . ?
 C135 H3CB 0.9700 . ?
 C135 C1r 1.536(14) . ?
 C135 C1u 1.482(13) . ?
 O16B C136 1.301(15) . ?
 O16B C1t 1.334(15) . ?
 C136 H1CC 0.9700 . ?
 C136 H1CD 0.9700 . ?
 C136 C1s 1.556(15) . ?
 C134 H2CA 0.9700 . ?
 C134 H2CB 0.9700 . ?
 C134 C1s 1.518(16) . ?
 C134 C1t 1.531(16) . ?
 C1r H7CA 0.9700 . ?
 C1r H7CB 0.9700 . ?
 C1s H4CA 0.9700 . ?
 C1s H4CB 0.9700 . ?
 C1t H6CA 0.9700 . ?
 C1t H6CB 0.9700 . ?
 C1u H5CA 0.9700 . ?
 C1u H5CB 0.9700 . ?
 O15A C129 1.450(16) . ?
 O15A C132 1.456(16) . ?
 C129 H2BA 0.9700 . ?
 C129 H2BB 0.9700 . ?
 C129 C130 1.540(15) . ?
 C131 H8CA 0.9700 . ?
 C131 H8CB 0.9700 . ?
 C131 C130 1.521(16) . ?
 C131 C132 1.539(15) . ?
 C130 H3BA 0.9700 . ?
 C130 H3BB 0.9700 . ?
 C132 H1BC 0.9700 . ?
 C132 H1BD 0.9700 . ?
 C1v H9CA 0.9700 . ?
 C1v H9CB 0.9700 . ?
 C1v O15B 1.423(12) . ?
 C1v C1w 1.527(14) . ?
 O15B C1x 1.410(10) . ?
 C1w H1DC 0.9700 . ?
 C1w H1DD 0.9700 . ?
 C1w C1y 1.528(14) . ?
 C1x H0DA 0.9700 . ?
 C1x H0DB 0.9700 . ?
 C1x C1y 1.508(13) . ?
 C1y H2DA 0.9700 . ?
 C1y H2DB 0.9700 . ?
 C14B H14D 0.9600 . ?
 C14B H14E 0.9600 . ?
 C14B H14F 0.9600 . ?
 C15B H15D 0.9600 . ?
 C15B H15E 0.9600 . ?
 C15B H15F 0.9600 . ?
 C16B H16D 0.9600 . ?
 C16B H16E 0.9600 . ?
 C16B H16F 0.9600 . ?
 C46B H46D 0.9600 . ?
 C46B H46E 0.9600 . ?
 C46B H46F 0.9600 . ?
 C45B H45D 0.9600 . ?
 C45B H45E 0.9600 . ?
 C45B H45F 0.9600 . ?
 C44B H44D 0.9600 . ?
 C44B H44E 0.9600 . ?
 C44B H44F 0.9600 . ?

loop_
  _geom_angle_atom_site_label_1
  _geom_angle_atom_site_label_2
  _geom_angle_atom_site_label_3
  _geom_angle
  _geom_angle_site_symmetry_1
  _geom_angle_site_symmetry_3
  _geom_angle_publ_flag
 N1 Y1 N3 107.11(10) . . ?
 N1 Y1 N2 110.16(10) . . ?
 N1 Y1 C2 97.72(10) . . ?
 N1 Y1 C1 80.22(10) . . ?
 N1 Y1 C3 127.96(10) . . ?
 N1 Y1 C4 144.88(11) . . ?
 N1 Y1 C5 121.58(10) . . ?
 N1 Y1 C6 93.10(11) . . ?
 N3 Y1 N2 111.92(10) . . ?
 N3 Y1 C2 138.95(10) . . ?
 N3 Y1 C1 122.04(11) . . ?
 N3 Y1 C3 118.52(10) . . ?
 N3 Y1 C4 87.22(10) . . ?
 N3 Y1 C5 74.87(10) . . ?
 N3 Y1 C6 90.70(11) . . ?
 N2 Y1 C2 88.39(10) . . ?
 N2 Y1 C1 118.94(10) . . ?
 N2 Y1 C3 75.59(10) . . ?
 N2 Y1 C4 92.74(10) . . ?
 N2 Y1 C5 123.22(10) . . ?
 N2 Y1 C6 139.63(10) . . ?
 C2 Y1 C1 31.47(11) . . ?
 C2 Y1 C3 30.45(10) . . ?
 C2 Y1 C4 55.37(11) . . ?
 C2 Y1 C5 64.27(11) . . ?
 C2 Y1 C6 55.16(11) . . ?
 C1 Y1 C3 55.47(10) . . ?
 C1 Y1 C4 65.23(11) . . ?
 C1 Y1 C5 55.20(11) . . ?
 C1 Y1 C6 31.62(11) . . ?
 C3 Y1 C5 55.34(10) . . ?
 C3 Y1 C6 64.15(11) . . ?
 C4 Y1 C3 31.98(10) . . ?
 C4 Y1 C5 30.56(11) . . ?
 C4 Y1 C6 53.98(11) . . ?
 C6 Y1 C5 29.78(11) . . ?
 N4 Y2 C2 92.34(11) . . ?
 N4 Y2 C1 77.87(10) . . ?
 N4 Y2 C3 122.19(10) . . ?
 N4 Y2 C4 142.32(10) . . ?
 N4 Y2 C5 124.50(10) . . ?
 N4 Y2 C6 94.78(11) . . ?
 N5 Y2 N4 107.58(11) . . ?
 N5 Y2 N6 106.78(11) . . ?
 N5 Y2 C2 95.91(11) . . ?
 N5 Y2 C1 127.17(11) . . ?
 N5 Y2 C3 80.37(10) . . ?
 N5 Y2 C4 94.54(11) . . ?
 N5 Y2 C5 123.54(11) . . ?
 N5 Y2 C6 145.21(11) . . ?
 N6 Y2 N4 111.15(11) . . ?
 N6 Y2 C2 139.65(11) . . ?
 N6 Y2 C1 120.23(11) . . ?
 N6 Y2 C3 121.10(11) . . ?
 N6 Y2 C4 90.14(11) . . ?
 N6 Y2 C5 75.34(11) . . ?
 N6 Y2 C6 88.68(11) . . ?
 C2 Y2 C1 31.80(11) . . ?
 C2 Y2 C3 30.65(10) . . ?
 C2 Y2 C4 54.50(11) . . ?
 C2 Y2 C5 64.31(11) . . ?
 C2 Y2 C6 55.97(11) . . ?
 C1 Y2 C3 56.07(10) . . ?
 C1 Y2 C4 64.48(10) . . ?
 C1 Y2 C5 55.44(11) . . ?
 C1 Y2 C6 32.18(11) . . ?
 C3 Y2 C4 31.49(10) . . ?
 C3 Y2 C5 55.36(10) . . ?
 C5 Y2 C4 30.00(11) . . ?
 C6 Y2 C3 65.09(11) . . ?
 C6 Y2 C4 53.57(11) . . ?
 C6 Y2 C5 29.96(11) . . ?
 O2 K1 O3 59.40(8) . . ?
 O2 K1 O1 59.92(8) . . ?
 O2 K1 O4 119.17(9) . . ?
 O2 K1 O6 120.13(11) . . ?
 O2 K1 O5 164.30(9) . . ?
 O2 K1 C75A 77.66(16) . 3_666 ?
 O2 K1 C74B 83.6(3) . 3_666 ?
 O2 K1 O7B 104.57(16) . . ?
 O3 K1 O1 116.10(9) . . ?
 O3 K1 O4 59.89(9) . . ?
 O3 K1 O5 116.28(10) . . ?
 O3 K1 C75A 68.7(3) . 3_666 ?
 O3 K1 C74B 92.1(4) . 3_666 ?
 O1 K1 O5 116.37(10) . . ?
 O1 K1 C75A 80.9(2) . 3_666 ?
 O1 K1 C74B 63.2(3) . 3_666 ?
 O4 K1 O1 165.17(9) . . ?
 O4 K1 O5 59.96(10) . . ?
 O4 K1 C75A 84.4(2) . 3_666 ?
 O4 K1 C74B 102.1(3) . 3_666 ?
 O6 K1 O3 164.33(10) . . ?
 O6 K1 O1 60.27(10) . . ?
 O6 K1 O4 119.19(10) . . ?
 O6 K1 O5 59.36(11) . . ?
 O6 K1 C75A 95.7(3) . 3_666 ?
 O6 K1 C74B 72.6(4) . 3_666 ?
 O6 K1 O7B 94.41(16) . . ?
 O5 K1 C75A 86.72(17) . 3_666 ?
 O5 K1 C74B 81.4(3) . 3_666 ?
 C75A K1 C74B 24.3(3) 3_666 3_666 ?
 O7B K1 O3 100.83(15) . . ?
 O7B K1 O1 111.73(13) . . ?
 O7B K1 O4 83.03(13) . . ?
 O7B K1 O5 91.00(16) . . ?
 O7B K1 C74B 166.9(4) . 3_666 ?
 O7A K1 O2 115.7(4) . . ?
 O7A K1 O3 122.2(5) . . ?
 O7A K1 O1 100.4(4) . . ?
 O7A K1 O4 93.1(4) . . ?
 O7A K1 O6 73.0(5) . . ?
 O7A K1 O5 79.7(4) . . ?
 O7A K1 C74B 145.5(6) . 3_666 ?
 O14A K2 O10A 116.6(3) . . ?
 O12A K2 O14A 121.7(3) . . ?
 O12A K2 O10A 120.4(3) . . ?
 O12A K2 O11A 64.9(4) . . ?
 O12A K2 O13A 64.9(3) . . ?
 O10B K2 O13B 170.8(4) . . ?
 O11A K2 O14A 173.3(3) . . ?
 O11A K2 O10A 56.6(4) . . ?
 O11A K2 O13A 126.9(4) . . ?
 O9B K2 O13B 123.4(3) . . ?
 O9B K2 O10B 63.2(2) . . ?
 O9B K2 O14B 62.2(2) . . ?
 O13A K2 O14A 59.8(2) . . ?
 O13A K2 O10A 172.3(3) . . ?
 O14B K2 O13B 61.7(3) . . ?
 O14B K2 O10B 123.4(3) . . ?
 C48 N1 Y1 139.6(2) . . ?
 C48 N1 C47 112.0(3) . . ?
 C47 N1 Y1 108.3(2) . . ?
 C18 N3 Y1 128.3(2) . . ?
 C18 N3 C17 112.5(3) . . ?
 C17 N3 Y1 119.2(2) . . ?
 C99 O2 K1 118.0(2) . . ?
 C99 O2 C98 111.5(3) . . ?
 C98 O2 K1 118.8(2) . . ?
 C78 N2 Y1 126.8(2) . . ?
 C78 N2 C77 114.4(3) . . ?
 C77 N2 Y1 118.0(2) . . ?
 C100 O3 K1 116.2(2) . . ?
 C101 O3 K1 113.4(3) . . ?
 C101 O3 C100 112.2(4) . . ?
 C57 N4 Y2 112.4(2) . . ?
 C58 N4 Y2 131.6(2) . . ?
 C58 N4 C57 114.5(3) . . ?
 C88 N5 Y2 139.6(3) . . ?
 C88 N5 C87 112.8(3) . . ?
 C87 N5 Y2 107.5(2) . . ?
 C97 O1 K1 110.1(3) . . ?
 C97 O1 C108 111.9(3) . . ?
 C108 O1 K1 110.6(3) . . ?
 C28 N6 Y2 131.0(2) . . ?
 C28 N6 C27 113.7(3) . . ?
 C27 N6 Y2 115.3(2) . . ?
 C102 O4 K1 115.9(3) . . ?
 C103 O4 K1 116.1(3) . . ?
 C103 O4 C102 112.4(4) . . ?
 C68 C69 H69 118.7 . . ?
 C68 C69 C70 122.6(3) . . ?
 C70 C69 H69 118.7 . . ?
 Y1 C2 H4 119.8 . . ?
 Y2 C2 Y1 119.26(14) . . ?
 Y2 C2 H4 120.9 . . ?
 C1 C2 Y1 75.66(19) . . ?
 C1 C2 Y2 74.72(19) . . ?
 C1 C2 H4 118.5 . . ?
 C3 C2 Y1 76.96(19) . . ?
 C3 C2 Y2 76.88(19) . . ?
 C3 C2 H4 118.5 . . ?
 C3 C2 C1 123.0(3) . . ?
 C19 C18 N3 123.2(3) . . ?
 C19 C18 C23 117.7(3) . . ?
 C23 C18 N3 119.1(3) . . ?
 C69 C68 C77 118.4(3) . . ?
 C69 C68 C67 119.5(3) . . ?
 C67 C68 C77 122.0(3) . . ?
 C107 O6 K1 116.9(3) . . ?
 C107 O6 C106 113.1(4) . . ?
 C106 O6 K1 118.7(3) . . ?
 Y2 C1 Y1 117.34(13) . . ?
 C2 C1 Y1 72.87(19) . . ?
 C2 C1 Y2 73.48(18) . . ?
 C2 C1 C6 116.9(3) . . ?
 C2 C1 C37 120.7(3) . . ?
 C6 C1 Y1 75.71(19) . . ?
 C6 C1 Y2 74.81(18) . . ?
 C37 C1 Y1 119.8(2) . . ?
 C37 C1 Y2 122.8(2) . . ?
 C37 C1 C6 122.5(3) . . ?
 N3 C17 H17A 108.4 . . ?
 N3 C17 H17B 108.4 . . ?
 N3 C17 C8 115.7(3) . . ?
 H17A C17 H17B 107.4 . . ?
 C8 C17 H17A 108.4 . . ?
 C8 C17 H17B 108.4 . . ?
 C105 O5 K1 111.7(3) . . ?
 C105 O5 C104 113.1(4) . . ?
 C104 O5 K1 111.9(3) . . ?
 C18 C19 C25 120.8(3) . . ?
 C20 C19 C18 120.3(4) . . ?
 C20 C19 C25 118.8(4) . . ?
 N2 C78 C83 120.6(3) . . ?
 C79 C78 N2 122.1(3) . . ?
 C79 C78 C83 117.3(3) . . ?
 N4 C57 H57A 108.5 . . ?
 N4 C57 H57B 108.5 . . ?
 N4 C57 C42 115.3(3) . . ?
 H57A C57 H57B 107.5 . . ?
 C42 C57 H57A 108.5 . . ?
 C42 C57 H57B 108.5 . . ?
 N2 C77 C68 116.1(3) . . ?
 N2 C77 H77A 108.3 . . ?
 N2 C77 H77B 108.3 . . ?
 C68 C77 H77A 108.3 . . ?
 C68 C77 H77B 108.3 . . ?
 H77A C77 H77B 107.4 . . ?
 Y2 C3 Y1 115.32(13) . . ?
 C2 C3 Y1 72.59(18) . . ?
 C2 C3 Y2 72.47(19) . . ?
 C2 C3 C4 118.1(3) . . ?
 C2 C3 C67 120.7(3) . . ?
 C4 C3 Y1 73.51(18) . . ?
 C4 C3 Y2 77.63(19) . . ?
 C67 C3 Y1 124.5(2) . . ?
 C67 C3 Y2 120.0(2) . . ?
 C67 C3 C4 121.3(3) . . ?
 Y1 C4 Y2 112.80(13) . . ?
 Y1 C4 H6 119.9 . . ?
 Y2 C4 H6 127.2 . . ?
 C3 C4 Y1 74.52(17) . . ?
 C3 C4 Y2 70.88(19) . . ?
 C3 C4 H6 120.0 . . ?
 C5 C4 Y1 76.60(19) . . ?
 C5 C4 Y2 74.0(2) . . ?
 C5 C4 C3 120.1(3) . . ?
 C5 C4 H6 120.0 . . ?
 C23 C22 H22 119.0 . . ?
 C21 C22 H22 119.0 . . ?
 C21 C22 C23 122.0(4) . . ?
 Y1 C5 Y2 112.12(12) . . ?
 C4 C5 Y1 72.84(18) . . ?
 C4 C5 Y2 76.0(2) . . ?
 C4 C5 C7 119.4(3) . . ?
 C6 C5 Y1 74.58(19) . . ?
 C6 C5 Y2 71.9(2) . . ?
 C6 C5 C4 120.2(3) . . ?
 C6 C5 C7 120.4(3) . . ?
 C7 C5 Y1 124.0(2) . . ?
 C7 C5 Y2 123.9(2) . . ?
 C68 C67 C3 120.9(3) . . ?
 C68 C67 C72 118.7(3) . . ?
 C72 C67 C3 120.3(3) . . ?
 C41 C42 C57 119.2(3) . . ?
 C41 C42 C37 119.0(3) . . ?
 C37 C42 C57 121.8(3) . . ?
 C18 C23 C26 120.1(3) . . ?
 C22 C23 C18 120.0(3) . . ?
 C22 C23 C26 119.9(3) . . ?
 Y1 C6 H2 124.0 . . ?
 Y2 C6 Y1 115.12(13) . . ?
 Y2 C6 H2 120.7 . . ?
 C1 C6 Y1 72.67(19) . . ?
 C1 C6 Y2 73.01(18) . . ?
 C1 C6 H2 119.2 . . ?
 C5 C6 Y1 75.6(2) . . ?
 C5 C6 Y2 78.2(2) . . ?
 C5 C6 C1 121.6(3) . . ?
 C5 C6 H2 119.2 . . ?
 C78 C79 C84 119.9(3) . . ?
 C80 C79 C78 119.7(3) . . ?
 C80 C79 C84 120.4(3) . . ?
 C7 C12 C27 121.6(3) . . ?
 C11 C12 C7 118.7(4) . . ?
 C11 C12 C27 119.6(3) . . ?
 C7 C8 C17 121.8(3) . . ?
 C7 C8 C9 119.3(3) . . ?
 C9 C8 C17 118.9(3) . . ?
 N1 C48 C53 119.3(3) . . ?
 C49 C48 N1 122.0(3) . . ?
 C49 C48 C53 118.7(3) . . ?
 C72 C71 H71 118.4 . . ?
 C70 C71 H71 118.4 . . ?
 C70 C71 C72 123.2(3) . . ?
 C67 C72 C87 121.0(3) . . ?
 C71 C72 C67 119.2(3) . . ?
 C71 C72 C87 119.4(3) . . ?
 C19 C20 H20 119.0 . . ?
 C21 C20 C19 122.0(4) . . ?
 C21 C20 H20 119.0 . . ?
 C69 C70 C73 120.8(3) . . ?
 C71 C70 C69 116.8(3) . . ?
 C71 C70 C73 122.4(3) . . ?
 C78 C83 C86 119.9(3) . . ?
 C82 C83 C78 120.4(3) . . ?
 C82 C83 C86 119.5(3) . . ?
 C89 C88 N5 122.7(3) . . ?
 C89 C88 C93 118.6(4) . . ?
 C93 C88 N5 118.7(4) . . ?
 C12 C7 C5 119.5(3) . . ?
 C8 C7 C5 121.3(3) . . ?
 C8 C7 C12 119.2(3) . . ?
 C37 C38 C47 120.6(3) . . ?
 C39 C38 C37 119.1(4) . . ?
 C39 C38 C47 119.9(3) . . ?
 C63 C62 H62 118.8 . . ?
 C61 C62 H62 118.8 . . ?
 C61 C62 C63 122.4(4) . . ?
 C42 C41 H41 118.5 . . ?
 C40 C41 C42 123.0(4) . . ?
 C40 C41 H41 118.5 . . ?
 C42 C37 C1 120.8(3) . . ?
 C42 C37 C38 118.8(3) . . ?
 C38 C37 C1 120.4(3) . . ?
 N5 C87 C72 113.7(3) . . ?
 N5 C87 H87A 108.8 . . ?
 N5 C87 H87B 108.8 . . ?
 C72 C87 H87A 108.8 . . ?
 C72 C87 H87B 108.8 . . ?
 H87A C87 H87B 107.7 . . ?
 C79 C80 H80 118.6 . . ?
 C81 C80 C79 122.8(4) . . ?
 C81 C80 H80 118.6 . . ?
 C48 C53 C56 120.3(3) . . ?
 C52 C53 C48 119.3(3) . . ?
 C52 C53 C56 120.3(3) . . ?
 C79 C84 H84A 109.5 . . ?
 C79 C84 H84B 109.5 . . ?
 C79 C84 H84C 109.5 . . ?
 H84A C84 H84B 109.5 . . ?
 H84A C84 H84C 109.5 . . ?
 H84B C84 H84C 109.5 . . ?
 C62 C63 C58 120.1(4) . . ?
 C62 C63 C66 119.9(3) . . ?
 C58 C63 C66 119.8(3) . . ?
 C126 O14A K2 117.3(8) . . ?
 C126 O14A C127 107.7(10) . . ?
 C127 O14A K2 120.9(8) . . ?
 C22 C21 C24 120.6(4) . . ?
 C20 C21 C22 118.0(4) . . ?
 C20 C21 C24 121.4(4) . . ?
 C23 C26 H26A 109.5 . . ?
 C23 C26 H26B 109.5 . . ?
 C23 C26 H26C 109.5 . . ?
 H26A C26 H26B 109.5 . . ?
 H26A C26 H26C 109.5 . . ?
 H26B C26 H26C 109.5 . . ?
 H54A C54 H54B 109.5 . . ?
 H54A C54 H54C 109.5 . . ?
 H54B C54 H54C 109.5 . . ?
 C49 C54 H54A 109.5 . . ?
 C49 C54 H54B 109.5 . . ?
 C49 C54 H54C 109.5 . . ?
 C62 C61 C60 117.5(4) . . ?
 C62 C61 C65 121.2(4) . . ?
 C60 C61 C65 121.3(4) . . ?
 C63 C58 N4 121.0(3) . . ?
 C63 C58 C59 117.6(3) . . ?
 C59 C58 N4 121.3(3) . . ?
 C88 C89 C94 121.9(3) . . ?
 C90 C89 C88 118.9(4) . . ?
 C90 C89 C94 119.1(4) . . ?
 C83 C82 H82 118.7 . . ?
 C81 C82 C83 122.7(4) . . ?
 C81 C82 H82 118.7 . . ?
 N1 C47 C38 112.9(3) . . ?
 N1 C47 H47A 109.0 . . ?
 N1 C47 H47B 109.0 . . ?
 C38 C47 H47A 109.0 . . ?
 C38 C47 H47B 109.0 . . ?
 H47A C47 H47B 107.8 . . ?
 C53 C56 H56A 109.5 . . ?
 C53 C56 H56B 109.5 . . ?
 C53 C56 H56C 109.5 . . ?
 H56A C56 H56B 109.5 . . ?
 H56A C56 H56C 109.5 . . ?
 H56B C56 H56C 109.5 . . ?
 C12 C11 H11 118.3 . . ?
 C10 C11 C12 123.4(4) . . ?
 C10 C11 H11 118.3 . . ?
 C48 C49 C54 121.3(3) . . ?
 C50 C49 C48 119.6(3) . . ?
 C50 C49 C54 119.1(3) . . ?
 C83 C86 H86A 109.5 . . ?
 C83 C86 H86B 109.5 . . ?
 C83 C86 H86C 109.5 . . ?
 H86A C86 H86B 109.5 . . ?
 H86A C86 H86C 109.5 . . ?
 H86B C86 H86C 109.5 . . ?
 C33 C28 N6 118.6(4) . . ?
 C29 C28 N6 122.9(3) . . ?
 C29 C28 C33 118.5(3) . . ?
 C38 C39 H39 118.2 . . ?
 C38 C39 C40 123.6(4) . . ?
 C40 C39 H39 118.2 . . ?
 C8 C9 H9 118.6 . . ?
 C10 C9 C8 122.7(4) . . ?
 C10 C9 H9 118.6 . . ?
 C80 C81 C85 121.4(4) . . ?
 C82 C81 C80 117.0(4) . . ?
 C82 C81 C85 121.6(4) . . ?
 C124 O13B K2 117.4(8) . . ?
 C124 O13B C16 118.6(12) . . ?
 C16 O13B K2 113.6(9) . . ?
 C33 C32 H32 118.7 . . ?
 C31 C32 H32 118.7 . . ?
 C31 C32 C33 122.6(4) . . ?
 C28 C33 C36 119.9(3) . . ?
 C32 C33 C28 119.6(4) . . ?
 C32 C33 C36 120.5(4) . . ?
 C53 C52 H52 118.8 . . ?
 C51 C52 C53 122.3(4) . . ?
 C51 C52 H52 118.8 . . ?
 C61 C60 H60 118.9 . . ?
 C61 C60 C59 122.2(4) . . ?
 C59 C60 H60 118.9 . . ?
 C89 C94 H94A 109.5 . . ?
 C89 C94 H94B 109.5 . . ?
 C89 C94 H94C 109.5 . . ?
 H94A C94 H94B 109.5 . . ?
 H94A C94 H94C 109.5 . . ?
 H94B C94 H94C 109.5 . . ?
 N6 C27 C12 115.4(3) . . ?
 N6 C27 H27A 108.4 . . ?
 N6 C27 H27B 108.4 . . ?
 C12 C27 H27A 108.4 . . ?
 C12 C27 H27B 108.4 . . ?
 H27A C27 H27B 107.5 . . ?
 O1 C97 H97A 109.9 . . ?
 O1 C97 H97B 109.9 . . ?
 O1 C97 C98 109.0(3) . . ?
 H97A C97 H97B 108.3 . . ?
 C98 C97 H97A 109.9 . . ?
 C98 C97 H97B 109.9 . . ?
 C33 C36 H36A 109.5 . . ?
 C33 C36 H36B 109.5 . . ?
 C33 C36 H36C 109.5 . . ?
 H36A C36 H36B 109.5 . . ?
 H36A C36 H36C 109.5 . . ?
 H36B C36 H36C 109.5 . . ?
 C41 C40 C43 121.7(4) . . ?
 C39 C40 C41 116.2(4) . . ?
 C39 C40 C43 121.8(4) . . ?
 O2 C99 H99A 109.8 . . ?
 O2 C99 H99B 109.8 . . ?
 O2 C99 C100 109.5(4) . . ?
 H99A C99 H99B 108.2 . . ?
 C100 C99 H99A 109.8 . . ?
 C100 C99 H99B 109.8 . . ?
 C49 C50 H50 118.9 . . ?
 C51 C50 C49 122.2(4) . . ?
 C51 C50 H50 118.9 . . ?
 C70 C73 C74A 108.9(4) . . ?
 C70 C73 C75B 102.7(6) . . ?
 C76A C73 C70 115.5(5) . . ?
 C76A C73 C74A 102.1(5) . . ?
 C75A C73 C70 112.2(4) . . ?
 C75A C73 C76A 110.7(6) . . ?
 C75A C73 C74A 106.5(8) . . ?
 C74B C73 C70 111.7(6) . . ?
 C74B C73 C75B 108.4(13) . . ?
 C74B C73 C76B 119.3(12) . . ?
 C76B C73 C70 106.9(8) . . ?
 C76B C73 C75B 106.4(14) . . ?
 C19 C25 H25A 109.5 . . ?
 C19 C25 H25B 109.5 . . ?
 C19 C25 H25C 109.5 . . ?
 H25A C25 H25B 109.5 . . ?
 H25A C25 H25C 109.5 . . ?
 H25B C25 H25C 109.5 . . ?
 C58 C59 C64 120.1(4) . . ?
 C60 C59 C58 120.2(4) . . ?
 C60 C59 C64 119.8(4) . . ?
 C52 C51 C50 117.8(3) . . ?
 C52 C51 C55 121.5(4) . . ?
 C50 C51 C55 120.7(4) . . ?
 H34A C34 H34B 109.5 . . ?
 H34A C34 H34C 109.5 . . ?
 H34B C34 H34C 109.5 . . ?
 C29 C34 H34A 109.5 . . ?
 C29 C34 H34B 109.5 . . ?
 C29 C34 H34C 109.5 . . ?
 C28 C29 C34 122.2(3) . . ?
 C28 C29 C30 119.6(4) . . ?
 C30 C29 C34 118.2(4) . . ?
 O2 C98 C97 109.0(3) . . ?
 O2 C98 H98A 109.9 . . ?
 O2 C98 H98B 109.9 . . ?
 C97 C98 H98A 109.9 . . ?
 C97 C98 H98B 109.9 . . ?
 H98A C98 H98B 108.3 . . ?
 C121 O11B K2 116.2(6) . . ?
 C121 O11B C1g 106.4(9) . . ?
 C1g O11B K2 113.8(6) . . ?
 C11 C10 C9 116.6(4) . . ?
 C11 C10 C13 119.7(4) . . ?
 C9 C10 C13 123.7(4) . . ?
 C32 C31 C30 117.5(4) . . ?
 C32 C31 C35 121.8(5) . . ?
 C30 C31 C35 120.6(5) . . ?
 O3 C100 C99 108.1(4) . . ?
 O3 C100 H10A 110.1 . . ?
 O3 C100 H10B 110.1 . . ?
 C99 C100 H10A 110.1 . . ?
 C99 C100 H10B 110.1 . . ?
 H10A C100 H10B 108.4 . . ?
 C63 C66 H66A 109.5 . . ?
 C63 C66 H66B 109.5 . . ?
 C63 C66 H66C 109.5 . . ?
 H66A C66 H66B 109.5 . . ?
 H66A C66 H66C 109.5 . . ?
 H66B C66 H66C 109.5 . . ?
 C29 C30 H30 118.9 . . ?
 C31 C30 C29 122.2(4) . . ?
 C31 C30 H30 118.9 . . ?
 C51 C55 H55A 109.5 . . ?
 C51 C55 H55B 109.5 . . ?
 C51 C55 H55C 109.5 . . ?
 H55A C55 H55B 109.5 . . ?
 H55A C55 H55C 109.5 . . ?
 H55B C55 H55C 109.5 . . ?
 C88 C93 C96 120.0(4) . . ?
 C92 C93 C88 119.1(4) . . ?
 C92 C93 C96 120.8(4) . . ?
 O6 C107 H10C 109.7 . . ?
 O6 C107 H10D 109.7 . . ?
 O6 C107 C108 109.7(5) . . ?
 H10C C107 H10D 108.2 . . ?
 C108 C107 H10C 109.7 . . ?
 C108 C107 H10D 109.7 . . ?
 O6 C106 H10E 110.0 . . ?
 O6 C106 H10F 110.0 . . ?
 O6 C106 C105 108.4(5) . . ?
 H10E C106 H10F 108.4 . . ?
 C105 C106 H10E 110.0 . . ?
 C105 C106 H10F 110.0 . . ?
 C59 C64 H64A 109.5 . . ?
 C59 C64 H64B 109.5 . . ?
 C59 C64 H64C 109.5 . . ?
 H64A C64 H64B 109.5 . . ?
 H64A C64 H64C 109.5 . . ?
 H64B C64 H64C 109.5 . . ?
 C89 C90 H90 118.4 . . ?
 C91 C90 C89 123.3(5) . . ?
 C91 C90 H90 118.4 . . ?
 O3 C101 H10G 110.1 . . ?
 O3 C101 H10H 110.1 . . ?
 O3 C101 C102 107.9(4) . . ?
 H10G C101 H10H 108.4 . . ?
 C102 C101 H10G 110.1 . . ?
 C102 C101 H10H 110.1 . . ?
 C61 C65 H65A 109.5 . . ?
 C61 C65 H65B 109.5 . . ?
 C61 C65 H65C 109.5 . . ?
 H65A C65 H65B 109.5 . . ?
 H65A C65 H65C 109.5 . . ?
 H65B C65 H65C 109.5 . . ?
 C93 C92 H92 118.7 . . ?
 C91 C92 C93 122.6(5) . . ?
 C91 C92 H92 118.7 . . ?
 C123 O12B K2 112.2(6) . . ?
 C122 O12B K2 113.8(6) . . ?
 C122 O12B C123 114.9(8) . . ?
 O1 C108 C107 108.1(4) . . ?
 O1 C108 H10I 110.1 . . ?
 O1 C108 H10J 110.1 . . ?
 C107 C108 H10I 110.1 . . ?
 C107 C108 H10J 110.1 . . ?
 H10I C108 H10J 108.4 . . ?
 C81 C85 H85A 109.5 . . ?
 C81 C85 H85B 109.5 . . ?
 C81 C85 H85C 109.5 . . ?
 H85A C85 H85B 109.5 . . ?
 H85A C85 H85C 109.5 . . ?
 H85B C85 H85C 109.5 . . ?
 O4 C102 C101 108.6(4) . . ?
 O4 C102 H10K 110.0 . . ?
 O4 C102 H10L 110.0 . . ?
 C101 C102 H10K 110.0 . . ?
 C101 C102 H10L 110.0 . . ?
 H10K C102 H10L 108.4 . . ?
 C90 C91 C92 117.5(4) . . ?
 C90 C91 C95 121.6(6) . . ?
 C92 C91 C95 120.8(5) . . ?
 C21 C24 H24A 109.5 . . ?
 C21 C24 H24B 109.5 . . ?
 C21 C24 H24C 109.5 . . ?
 H24A C24 H24B 109.5 . . ?
 H24A C24 H24C 109.5 . . ?
 H24B C24 H24C 109.5 . . ?
 C31 C35 H35A 109.5 . . ?
 C31 C35 H35B 109.5 . . ?
 C31 C35 H35C 109.5 . . ?
 H35A C35 H35B 109.5 . . ?
 H35A C35 H35C 109.5 . . ?
 H35B C35 H35C 109.5 . . ?
 O4 C103 H10M 109.9 . . ?
 O4 C103 H10N 109.9 . . ?
 O4 C103 C104 108.9(5) . . ?
 H10M C103 H10N 108.3 . . ?
 C104 C103 H10M 109.9 . . ?
 C104 C103 H10N 109.9 . . ?
 H11M C114 H11N 109.4 . . ?
 C115 C114 H11M 111.6 . . ?
 C115 C114 H11N 111.6 . . ?
 C113 C114 H11M 111.6 . . ?
 C113 C114 H11N 111.6 . . ?
 C113 C114 C115 101.0(6) . . ?
 O5 C105 C106 109.4(4) . . ?
 O5 C105 H10O 109.8 . . ?
 O5 C105 H10P 109.8 . . ?
 C106 C105 H10O 109.8 . . ?
 C106 C105 H10P 109.8 . . ?
 H10O C105 H10P 108.3 . . ?
 O5 C104 C103 109.5(4) . . ?
 O5 C104 H10Q 109.8 . . ?
 O5 C104 H10R 109.8 . . ?
 C103 C104 H10Q 109.8 . . ?
 C103 C104 H10R 109.8 . . ?
 H10Q C104 H10R 108.2 . . ?
 H12A C125 H12B 108.7 . . ?
 C126 C125 H12A 110.5 . . ?
 C126 C125 H12B 110.5 . . ?
 O13A C125 H12A 110.5 . . ?
 O13A C125 H12B 110.5 . . ?
 O13A C125 C126 106.2(10) . . ?
 C128 O9A K2 108.3(7) . . ?
 C128 O9A C117 117.8(12) . . ?
 C117 O9A K2 115.3(9) . . ?
 C93 C96 H96A 109.5 . . ?
 C93 C96 H96B 109.5 . . ?
 C93 C96 H96C 109.5 . . ?
 H96A C96 H96B 109.5 . . ?
 H96A C96 H96C 109.5 . . ?
 H96B C96 H96C 109.5 . . ?
 H46A C46A H46B 109.5 . . ?
 H46A C46A H46C 109.5 . . ?
 H46B C46A H46C 109.5 . . ?
 C43 C46A H46A 109.5 . . ?
 C43 C46A H46B 109.5 . . ?
 C43 C46A H46C 109.5 . . ?
 C73 C76A H76A 109.5 . . ?
 C73 C76A H76B 109.5 . . ?
 C73 C76A H76C 109.5 . . ?
 H76A C76A H76B 109.5 . . ?
 H76A C76A H76C 109.5 . . ?
 H76B C76A H76C 109.5 . . ?
 C10 C13 C16A 107.4(5) . . ?
 C10 C13 C14B 100.2(13) . . ?
 C10 C13 C16B 113.5(14) . . ?
 C15A C13 C10 109.1(5) . . ?
 C15A C13 C16A 105.3(7) . . ?
 C14A C13 C10 112.9(5) . . ?
 C14A C13 C15A 113.2(6) . . ?
 C14A C13 C16A 108.6(6) . . ?
 C15B C13 C10 127.0(18) . . ?
 C15B C13 C14B 95(3) . . ?
 C15B C13 C16B 110.5(14) . . ?
 C16B C13 C14B 105.6(13) . . ?
 O14A C126 C125 108.4(9) . . ?
 O14A C126 H12C 110.0 . . ?
 O14A C126 H12D 110.0 . . ?
 C125 C126 H12C 110.0 . . ?
 C125 C126 H12D 110.0 . . ?
 H12C C126 H12D 108.4 . . ?
 C40 C43 C44A 110.0(6) . . ?
 C40 C43 C45A 106.6(5) . . ?
 C40 C43 C46B 106.1(12) . . ?
 C40 C43 C45B 107.7(9) . . ?
 C46A C43 C40 114.7(7) . . ?
 C46A C43 C44A 108.4(7) . . ?
 C46A C43 C45A 110.5(7) . . ?
 C44A C43 C45A 106.4(6) . . ?
 C45B C43 C46B 104.2(11) . . ?
 C44B C43 C40 117.9(14) . . ?
 C44B C43 C46B 109.5(12) . . ?
 C44B C43 C45B 110.5(11) . . ?
 C116 O8B C113 110.3(7) . . ?
 O14A C127 H12E 110.9 . . ?
 O14A C127 H12F 110.9 . . ?
 O14A C127 C128 104.1(10) . . ?
 H12E C127 H12F 109.0 . . ?
 C128 C127 H12E 110.9 . . ?
 C128 C127 H12F 110.9 . . ?
 C119 O10A K2 116.6(10) . . ?
 C118 O10A K2 119.5(8) . . ?
 C118 O10A C119 111.7(12) . . ?
 C43 C44A H44A 109.5 . . ?
 C43 C44A H44B 109.5 . . ?
 C43 C44A H44C 109.5 . . ?
 H44A C44A H44B 109.5 . . ?
 H44A C44A H44C 109.5 . . ?
 H44B C44A H44C 109.5 . . ?
 C13 C15A H15A 109.5 . . ?
 C13 C15A H15B 109.5 . . ?
 C13 C15A H15C 109.5 . . ?
 H15A C15A H15B 109.5 . . ?
 H15A C15A H15C 109.5 . . ?
 H15B C15A H15C 109.5 . . ?
 C13 C14A H14A 109.5 . . ?
 C13 C14A H14B 109.5 . . ?
 C13 C14A H14C 109.5 . . ?
 H14A C14A H14B 109.5 . . ?
 H14A C14A H14C 109.5 . . ?
 H14B C14A H14C 109.5 . . ?
 C114 C115 H11O 110.6 . . ?
 C114 C115 H11P 110.6 . . ?
 H11O C115 H11P 108.8 . . ?
 C116 C115 C114 105.6(6) . . ?
 C116 C115 H11O 110.6 . . ?
 C116 C115 H11P 110.6 . . ?
 C91 C95 H95A 109.5 . . ?
 C91 C95 H95B 109.5 . . ?
 C91 C95 H95C 109.5 . . ?
 H95A C95 H95B 109.5 . . ?
 H95A C95 H95C 109.5 . . ?
 H95B C95 H95C 109.5 . . ?
 O8B C116 C115 111.0(7) . . ?
 O8B C116 H11Q 109.4 . . ?
 O8B C116 H11R 109.4 . . ?
 C115 C116 H11Q 109.4 . . ?
 C115 C116 H11R 109.4 . . ?
 H11Q C116 H11R 108.0 . . ?
 C73 C74A H74A 109.5 . . ?
 C73 C74A H74B 109.5 . . ?
 C73 C74A H74C 109.5 . . ?
 H74A C74A H74B 109.5 . . ?
 H74A C74A H74C 109.5 . . ?
 H74B C74A H74C 109.5 . . ?
 O11B C121 H12G 110.4 . . ?
 O11B C121 H12H 110.4 . . ?
 O11B C121 C122 106.7(9) . . ?
 H12G C121 H12H 108.6 . . ?
 C122 C121 H12G 110.4 . . ?
 C122 C121 H12H 110.4 . . ?
 C43 C45A H45A 109.5 . . ?
 C43 C45A H45B 109.5 . . ?
 C43 C45A H45C 109.5 . . ?
 H45A C45A H45B 109.5 . . ?
 H45A C45A H45C 109.5 . . ?
 H45B C45A H45C 109.5 . . ?
 K1 C75A H75A 65.6 3_666 . ?
 K1 C75A H75B 48.1 3_666 . ?
 K1 C75A H75C 106.4 3_666 . ?
 C73 C75A K1 143.0(9) . 3_666 ?
 C73 C75A H75A 109.5 . . ?
 C73 C75A H75B 109.5 . . ?
 C73 C75A H75C 109.5 . . ?
 H75A C75A H75B 109.5 . . ?
 H75A C75A H75C 109.5 . . ?
 H75B C75A H75C 109.5 . . ?
 O9A C128 C127 117.9(14) . . ?
 O9A C128 H12I 107.8 . . ?
 O9A C128 H12J 107.8 . . ?
 C127 C128 H12I 107.8 . . ?
 C127 C128 H12J 107.8 . . ?
 H12I C128 H12J 107.2 . . ?
 C114 C113 H11S 111.5 . . ?
 C114 C113 H11T 111.5 . . ?
 O8B C113 C114 101.6(7) . . ?
 O8B C113 H11S 111.5 . . ?
 O8B C113 H11T 111.5 . . ?
 H11S C113 H11T 109.3 . . ?
 O13B C124 H12K 109.1 . . ?
 O13B C124 H12L 109.1 . . ?
 O13B C124 C123 112.5(12) . . ?
 H12K C124 H12L 107.8 . . ?
 C123 C124 H12K 109.1 . . ?
 C123 C124 H12L 109.1 . . ?
 C13 C16A H16A 109.5 . . ?
 C13 C16A H16B 109.5 . . ?
 C13 C16A H16C 109.5 . . ?
 H16A C16A H16B 109.5 . . ?
 H16A C16A H16C 109.5 . . ?
 H16B C16A H16C 109.5 . . ?
 O12B C123 C124 112.3(9) . . ?
 O12B C123 H12M 109.1 . . ?
 O12B C123 H12N 109.1 . . ?
 C124 C123 H12M 109.1 . . ?
 C124 C123 H12N 109.1 . . ?
 H12M C123 H12N 107.9 . . ?
 O12B C122 C121 110.3(9) . . ?
 O12B C122 H12O 109.6 . . ?
 O12B C122 H12P 109.6 . . ?
 C121 C122 H12O 109.6 . . ?
 C121 C122 H12P 109.6 . . ?
 H12O C122 H12P 108.1 . . ?
 K1 C74B H74D 63.3 3_666 . ?
 K1 C74B H74E 115.0 3_666 . ?
 K1 C74B H74F 47.4 3_666 . ?
 C73 C74B K1 134.7(13) . 3_666 ?
 C73 C74B H74D 109.5 . . ?
 C73 C74B H74E 109.5 . . ?
 C73 C74B H74F 109.5 . . ?
 H74D C74B H74E 109.5 . . ?
 H74D C74B H74F 109.5 . . ?
 H74E C74B H74F 109.5 . . ?
 C73 C75B H75D 109.5 . . ?
 C73 C75B H75E 109.5 . . ?
 C73 C75B H75F 109.5 . . ?
 H75D C75B H75E 109.5 . . ?
 H75D C75B H75F 109.5 . . ?
 H75E C75B H75F 109.5 . . ?
 C73 C76B H76D 109.5 . . ?
 C73 C76B H76E 109.5 . . ?
 C73 C76B H76F 109.5 . . ?
 H76D C76B H76E 109.5 . . ?
 H76D C76B H76F 109.5 . . ?
 H76E C76B H76F 109.5 . . ?
 C1a O12A K2 113.5(8) . . ?
 C1a O12A C1c 112.0(12) . . ?
 C1c O12A K2 117.4(9) . . ?
 K2 C14 H14G 150.3 . . ?
 K2 C14 H14H 93.9 . . ?
 H14G C14 H14H 107.5 . . ?
 C16 C14 K2 82.7(7) . . ?
 C16 C14 H14G 108.5 . . ?
 C16 C14 H14H 108.5 . . ?
 O14B C14 K2 43.5(6) . . ?
 O14B C14 H14G 108.5 . . ?
 O14B C14 H14H 108.5 . . ?
 O14B C14 C16 114.9(12) . . ?
 C1f O10B K2 117.7(8) . . ?
 C1f O10B C1h 107.2(9) . . ?
 C1h O10B K2 111.3(8) . . ?
 H15G C15 H15H 107.3 . . ?
 O11A C15 H15G 108.1 . . ?
 O11A C15 H15H 108.1 . . ?
 O11A C15 C1c 116.7(15) . . ?
 C1c C15 H15G 108.1 . . ?
 C1c C15 H15H 108.1 . . ?
 O13B C16 C14 112.7(11) . . ?
 O13B C16 H16G 109.0 . . ?
 O13B C16 H16H 109.0 . . ?
 C14 C16 H16G 109.0 . . ?
 C14 C16 H16H 109.0 . . ?
 H16G C16 H16H 107.8 . . ?
 C15 O11A K2 107.5(8) . . ?
 C15 O11A C120 105.8(14) . . ?
 C120 O11A K2 121.0(13) . . ?
 C1b O9B K2 114.0(7) . . ?
 C1i O9B K2 112.7(8) . . ?
 C1i O9B C1b 116.7(10) . . ?
 C125 O13A K2 113.1(8) . . ?
 C125 O13A C1e 107.9(9) . . ?
 C1e O13A K2 108.2(7) . . ?
 O12A C1a H1AA 108.5 . . ?
 O12A C1a H1AB 108.5 . . ?
 O12A C1a C1e 115.0(13) . . ?
 H1AA C1a H1AB 107.5 . . ?
 C1e C1a H1AA 108.5 . . ?
 C1e C1a H1AB 108.5 . . ?
 O9B C1b H1BA 108.6 . . ?
 O9B C1b H1BB 108.6 . . ?
 O9B C1b C1d 114.9(10) . . ?
 H1BA C1b H1BB 107.5 . . ?
 C1d C1b H1BA 108.6 . . ?
 C1d C1b H1BB 108.6 . . ?
 C14 O14B K2 116.3(8) . . ?
 C14 O14B C1d 109.6(11) . . ?
 C1d O14B K2 118.1(7) . . ?
 O12A C1c C15 107.0(12) . . ?
 O12A C1c H1CA 110.3 . . ?
 O12A C1c H1CB 110.3 . . ?
 C15 C1c H1CA 110.3 . . ?
 C15 C1c H1CB 110.3 . . ?
 H1CA C1c H1CB 108.6 . . ?
 C1b C1d H1DA 110.8 . . ?
 C1b C1d H1DB 110.8 . . ?
 O14B C1d C1b 104.9(11) . . ?
 O14B C1d H1DA 110.8 . . ?
 O14B C1d H1DB 110.8 . . ?
 H1DA C1d H1DB 108.8 . . ?
 O13A C1e H1EA 110.2 . . ?
 O13A C1e H1EB 110.2 . . ?
 C1a C1e O13A 107.7(12) . . ?
 C1a C1e H1EA 110.2 . . ?
 C1a C1e H1EB 110.2 . . ?
 H1EA C1e H1EB 108.5 . . ?
 O11A C120 H12Q 111.5 . . ?
 O11A C120 H12R 111.5 . . ?
 O11A C120 C119 101.3(15) . . ?
 H12Q C120 H12R 109.3 . . ?
 C119 C120 H12Q 111.5 . . ?
 C119 C120 H12R 111.5 . . ?
 O10A C119 C120 108.9(14) . . ?
 O10A C119 H11A 109.9 . . ?
 O10A C119 H11B 109.9 . . ?
 C120 C119 H11A 109.9 . . ?
 C120 C119 H11B 109.9 . . ?
 H11A C119 H11B 108.3 . . ?
 O9A C117 H11C 109.6 . . ?
 O9A C117 H11D 109.6 . . ?
 O9A C117 C118 110.4(12) . . ?
 H11C C117 H11D 108.1 . . ?
 C118 C117 H11C 109.6 . . ?
 C118 C117 H11D 109.6 . . ?
 O10A C118 C117 111.4(14) . . ?
 O10A C118 H11E 109.3 . . ?
 O10A C118 H11F 109.3 . . ?
 C117 C118 H11E 109.3 . . ?
 C117 C118 H11F 109.3 . . ?
 H11E C118 H11F 108.0 . . ?
 O10B C1f H1FA 110.8 . . ?
 O10B C1f H1FB 110.8 . . ?
 O10B C1f C1g 104.7(10) . . ?
 H1FA C1f H1FB 108.9 . . ?
 C1g C1f H1FA 110.8 . . ?
 C1g C1f H1FB 110.8 . . ?
 O11B C1g C1f 108.7(10) . . ?
 O11B C1g H1GA 109.9 . . ?
 O11B C1g H1GB 109.9 . . ?
 C1f C1g H1GA 109.9 . . ?
 C1f C1g H1GB 109.9 . . ?
 H1GA C1g H1GB 108.3 . . ?
 O10B C1h H1HA 110.5 . . ?
 O10B C1h H1HB 110.5 . . ?
 O10B C1h C1i 106.0(10) . . ?
 H1HA C1h H1HB 108.7 . . ?
 C1i C1h H1HA 110.5 . . ?
 C1i C1h H1HB 110.5 . . ?
 K2 C1i H1IA 153.4 . . ?
 K2 C1i H1IB 90.7 . . ?
 O9B C1i K2 45.5(6) . . ?
 O9B C1i C1h 113.3(11) . . ?
 O9B C1i H1IA 108.9 . . ?
 O9B C1i H1IB 108.9 . . ?
 C1h C1i K2 81.7(7) . . ?
 C1h C1i H1IA 108.9 . . ?
 C1h C1i H1IB 108.9 . . ?
 H1IA C1i H1IB 107.7 . . ?
 C109 O7B K1 140.3(5) . . ?
 C112 O7B K1 114.1(5) . . ?
 C112 O7B C109 105.5(7) . . ?
 H11G C110 H11H 109.1 . . ?
 C109 C110 H11G 111.2 . . ?
 C109 C110 H11H 111.2 . . ?
 C109 C110 C111 103.1(5) . . ?
 C111 C110 H11G 111.2 . . ?
 C111 C110 H11H 111.2 . . ?
 O7B C109 C110 109.8(6) . . ?
 O7B C109 H10S 109.7 . . ?
 O7B C109 H10T 109.7 . . ?
 C110 C109 H10S 109.7 . . ?
 C110 C109 H10T 109.7 . . ?
 H10S C109 H10T 108.2 . . ?
 C110 C111 H11I 110.9 . . ?
 C110 C111 H11J 110.9 . . ?
 H11I C111 H11J 108.9 . . ?
 C112 C111 C110 104.4(6) . . ?
 C112 C111 H11I 110.9 . . ?
 C112 C111 H11J 110.9 . . ?
 O7B C112 C111 116.0(7) . . ?
 O7B C112 H11K 108.3 . . ?
 O7B C112 H11L 108.3 . . ?
 C111 C112 H11K 108.3 . . ?
 C111 C112 H11L 108.3 . . ?
 H11K C112 H11L 107.4 . . ?
 C1j O7A K1 112.7(13) . . ?
 C1m O7A K1 130(2) . . ?
 C1m O7A C1j 107.7(16) . . ?
 O7A C1j H1JA 109.7 . . ?
 O7A C1j H1JB 109.7 . . ?
 O7A C1j C1k 110.0(14) . . ?
 H1JA C1j H1JB 108.2 . . ?
 C1k C1j H1JA 109.7 . . ?
 C1k C1j H1JB 109.7 . . ?
 C1j C1k H1KA 110.8 . . ?
 C1j C1k H1KB 110.8 . . ?
 C1j C1k C1l 104.6(12) . . ?
 H1KA C1k H1KB 108.9 . . ?
 C1l C1k H1KA 110.8 . . ?
 C1l C1k H1KB 110.8 . . ?
 C1k C1l H1LA 110.9 . . ?
 C1k C1l H1LB 110.9 . . ?
 C1k C1l C1m 104.1(12) . . ?
 H1LA C1l H1LB 109.0 . . ?
 C1m C1l H1LA 110.9 . . ?
 C1m C1l H1LB 110.9 . . ?
 O7A C1m C1l 109.9(15) . . ?
 O7A C1m H1MA 109.7 . . ?
 O7A C1m H1MB 109.7 . . ?
 C1l C1m H1MA 109.7 . . ?
 C1l C1m H1MB 109.7 . . ?
 H1MA C1m H1MB 108.2 . . ?
 C1n O8A C1p 97.4(19) . . ?
 O8A C1n H1NA 110.5 . . ?
 O8A C1n H1NB 110.5 . . ?
 O8A C1n C1q 106.3(17) . . ?
 H1NA C1n H1NB 108.7 . . ?
 C1q C1n H1NA 110.5 . . ?
 C1q C1n H1NB 110.5 . . ?
 H1OA C1o H1OB 109.3 . . ?
 C1p C1o H1OA 111.4 . . ?
 C1p C1o H1OB 111.4 . . ?
 C1q C1o H1OA 111.4 . . ?
 C1q C1o H1OB 111.4 . . ?
 C1q C1o C1p 101.7(11) . . ?
 O8A C1p C1o 104.4(17) . . ?
 O8A C1p H1PA 110.9 . . ?
 O8A C1p H1PB 110.9 . . ?
 C1o C1p H1PA 110.9 . . ?
 C1o C1p H1PB 110.9 . . ?
 H1PA C1p H1PB 108.9 . . ?
 C1n C1q H1QA 111.3 . . ?
 C1n C1q H1QB 111.3 . . ?
 C1o C1q C1n 102.3(11) . . ?
 C1o C1q H1QA 111.3 . . ?
 C1o C1q H1QB 111.3 . . ?
 H1QA C1q H1QB 109.2 . . ?
 C133 O16A K2 142.8(14) . . ?
 C1u O16A K2 95.8(11) . . ?
 C1u O16A C133 107.6(14) . . ?
 O16A C133 H0EA 111.7 . . ?
 O16A C133 H0EB 111.7 . . ?
 O16A C133 C1r 100.5(10) . . ?
 H0EA C133 H0EB 109.4 . . ?
 C1r C133 H0EA 111.7 . . ?
 C1r C133 H0EB 111.7 . . ?
 H3CA C135 H3CB 109.3 . . ?
 C1r C135 H3CA 111.5 . . ?
 C1r C135 H3CB 111.5 . . ?
 C1u C135 H3CA 111.5 . . ?
 C1u C135 H3CB 111.5 . . ?
 C1u C135 C1r 101.3(9) . . ?
 C136 O16B K2 125.6(10) . . ?
 C136 O16B C1t 106.9(14) . . ?
 C1t O16B K2 127.3(11) . . ?
 O16B C136 H1CC 109.4 . . ?
 O16B C136 H1CD 109.4 . . ?
 O16B C136 C1s 111.0(15) . . ?
 H1CC C136 H1CD 108.0 . . ?
 C1s C136 H1CC 109.4 . . ?
 C1s C136 H1CD 109.4 . . ?
 H2CA C134 H2CB 110.1 . . ?
 C1s C134 H2CA 112.6 . . ?
 C1s C134 H2CB 112.6 . . ?
 C1s C134 C1t 95.7(12) . . ?
 C1t C134 H2CA 112.6 . . ?
 C1t C134 H2CB 112.6 . . ?
 C133 C1r H7CA 112.8 . . ?
 C133 C1r H7CB 112.8 . . ?
 C135 C1r C133 94.9(8) . . ?
 C135 C1r H7CA 112.8 . . ?
 C135 C1r H7CB 112.8 . . ?
 H7CA C1r H7CB 110.2 . . ?
 C136 C1s H4CA 112.6 . . ?
 C136 C1s H4CB 112.6 . . ?
 C134 C1s C136 95.8(11) . . ?
 C134 C1s H4CA 112.6 . . ?
 C134 C1s H4CB 112.6 . . ?
 H4CA C1s H4CB 110.1 . . ?
 O16B C1t C134 108.9(14) . . ?
 O16B C1t H6CA 109.9 . . ?
 O16B C1t H6CB 109.9 . . ?
 C134 C1t H6CA 109.9 . . ?
 C134 C1t H6CB 109.9 . . ?
 H6CA C1t H6CB 108.3 . . ?
 K2 C1u H5CA 48.2 . . ?
 K2 C1u H5CB 131.0 . . ?
 O16A C1u K2 62.1(10) . . ?
 O16A C1u C135 109.7(11) . . ?
 O16A C1u H5CA 109.7 . . ?
 O16A C1u H5CB 109.7 . . ?
 C135 C1u K2 118.5(12) . . ?
 C135 C1u H5CA 109.7 . . ?
 C135 C1u H5CB 109.7 . . ?
 H5CA C1u H5CB 108.2 . . ?
 C129 O15A K2 110.9(17) . . ?
 C129 O15A C132 98.7(18) . . ?
 C132 O15A K2 111.5(15) . . ?
 O15A C129 H2BA 110.9 . . ?
 O15A C129 H2BB 110.9 . . ?
 O15A C129 C130 104.2(13) . . ?
 H2BA C129 H2BB 108.9 . . ?
 C130 C129 H2BA 110.9 . . ?
 C130 C129 H2BB 110.9 . . ?
 H8CA C131 H8CB 109.2 . . ?
 C130 C131 H8CA 111.3 . . ?
 C130 C131 H8CB 111.3 . . ?
 C130 C131 C132 102.5(10) . . ?
 C132 C131 H8CA 111.3 . . ?
 C132 C131 H8CB 111.3 . . ?
 C129 C130 H3BA 111.1 . . ?
 C129 C130 H3BB 111.1 . . ?
 C131 C130 C129 103.1(10) . . ?
 C131 C130 H3BA 111.1 . . ?
 C131 C130 H3BB 111.1 . . ?
 H3BA C130 H3BB 109.1 . . ?
 O15A C132 C131 103.7(13) . . ?
 O15A C132 H1BC 111.0 . . ?
 O15A C132 H1BD 111.0 . . ?
 C131 C132 H1BC 111.0 . . ?
 C131 C132 H1BD 111.0 . . ?
 H1BC C132 H1BD 109.0 . . ?
 H9CA C1v H9CB 109.4 . . ?
 O15B C1v H9CA 111.6 . . ?
 O15B C1v H9CB 111.6 . . ?
 O15B C1v C1w 100.7(11) . . ?
 C1w C1v H9CA 111.6 . . ?
 C1w C1v H9CB 111.6 . . ?
 C1v O15B K2 108.8(8) . . ?
 C1x O15B K2 123.2(8) . . ?
 C1x O15B C1v 104.5(10) . . ?
 C1v C1w H1DC 111.1 . . ?
 C1v C1w H1DD 111.1 . . ?
 C1v C1w C1y 103.3(8) . . ?
 H1DC C1w H1DD 109.1 . . ?
 C1y C1w H1DC 111.1 . . ?
 C1y C1w H1DD 111.1 . . ?
 O15B C1x H0DA 110.9 . . ?
 O15B C1x H0DB 110.9 . . ?
 O15B C1x C1y 104.2(9) . . ?
 H0DA C1x H0DB 108.9 . . ?
 C1y C1x H0DA 110.9 . . ?
 C1y C1x H0DB 110.9 . . ?
 C1w C1y H2DA 111.1 . . ?
 C1w C1y H2DB 111.1 . . ?
 C1x C1y C1w 103.4(8) . . ?
 C1x C1y H2DA 111.1 . . ?
 C1x C1y H2DB 111.1 . . ?
 H2DA C1y H2DB 109.0 . . ?
 C13 C14B H14D 109.5 . . ?
 C13 C14B H14E 109.5 . . ?
 C13 C14B H14F 109.5 . . ?
 H14D C14B H14E 109.5 . . ?
 H14D C14B H14F 109.5 . . ?
 H14E C14B H14F 109.5 . . ?
 C13 C15B H15D 109.5 . . ?
 C13 C15B H15E 109.5 . . ?
 C13 C15B H15F 109.5 . . ?
 H15D C15B H15E 109.5 . . ?
 H15D C15B H15F 109.5 . . ?
 H15E C15B H15F 109.5 . . ?
 C13 C16B H16D 109.5 . . ?
 C13 C16B H16E 109.5 . . ?
 C13 C16B H16F 109.5 . . ?
 H16D C16B H16E 109.5 . . ?
 H16D C16B H16F 109.5 . . ?
 H16E C16B H16F 109.5 . . ?
 C43 C46B H46D 109.5 . . ?
 C43 C46B H46E 109.5 . . ?
 C43 C46B H46F 109.5 . . ?
 H46D C46B H46E 109.5 . . ?
 H46D C46B H46F 109.5 . . ?
 H46E C46B H46F 109.5 . . ?
 C43 C45B H45D 109.5 . . ?
 C43 C45B H45E 109.5 . . ?
 C43 C45B H45F 109.5 . . ?
 H45D C45B H45E 109.5 . . ?
 H45D C45B H45F 109.5 . . ?
 H45E C45B H45F 109.5 . . ?
 C43 C44B H44D 109.5 . . ?
 C43 C44B H44E 109.5 . . ?
 C43 C44B H44F 109.5 . . ?
 H44D C44B H44E 109.5 . . ?
 H44D C44B H44F 109.5 . . ?
 H44E C44B H44F 109.5 . . ?

_shelx_res_file
;
TITL cg4060p2_a.res in P2(1)/c
    cg4060p2.res
    created by SHELXL-2016/6 at 18:05:13 on 25-Nov-2019
REM Old TITL CG4060p2 in P2(1)/c
REM SHELXT solution in P2(1)/c
REM R1 0.198, Rweak 0.012, Alpha 0.088, Orientation as input
REM Formula found by SHELXT: C117 N16 O8A K2 Y2
CELL 0.71073 18.769 28.9313 24.4716 90 97.056 90
ZERR 4 0.0007 0.0011 0.0008 0 0.003 0
LATT 1
SYMM -X,0.5+Y,0.5-Z
SFAC C H K N O Y
UNIT 544 776 8 24 64 8
SADI C16 C14 C126 C125 C1E C1A C124 C123 C15 C1C C122 C121 C1G C1F C1H C1I =
 C117 C118 C1D C1B C128 C127
SADI O14A C127 O14B C1D O14B C14 O14A C126 O13A C125 O13B C16 O12A C1A O12B =
 C123 O12B C122 O12A C1C O11B C1G O11A C15 O11A C120 O11B C121 O10B C1F O10A =
 C119 O10B C1H O10A C118 O9B C1I O9A C117 O9A C128 O9B C1B
SADI C112 C111 C110 C111 C109 C110 C1M C1L C1L C1K C1K C1J
SADI O7A C1J O7A C1M O7B C109 O7B C112
SADI C1M C1K C1J C1L C109 C111 C112 C110
SADI O8A C1P O8A C1N O8B C113 O8B C116
SADI C1P C1O C1O C1Q C113 C114 C115 C114 C116 C115 C1N C1Q
SADI C1P C1Q C1N C1O C113 C115 C114 C116
SADI C7CA C0EA C7CA C3CA C5CA C3CA C4CA C1CA C4CA C2CA C6CA C2CA
SADI O2AA C0EA O5AA C6CA O5AA C1CA O2AA C5CA
SADI C0EA C3CA C7CA C5CA C1CA C2CA C4CA C6CA
SADI C8CA C1BA C2DA C1DA C2DA C0DA C3BA C2BA C8CA C3BA C9CA C1DA
SADI O4AA C2BA O4AA C1BA O3AA C9CA O3AA C0DA
SADI C1BA C3BA C8CA C2BA C9CA C2DA C0DA C1DA
SADI C75A C73 C76A C73 C75B C73 C74B C73 C74A C73 C76B C73
SADI C16B C13 C15B C13 C16A C13 C15A C13 C14B C13 C14A C13
SADI C16B C14B C14A C15A C16B C15B C14A C16A
SADI C46B C43 C44B C43 C45A C43 C45B C43 C43 C46A C44A C43
SADI C44B C45B C44A C45A
SADI C45A C46A C45B C46B
SADI C46B C44B C46A C44A
SADI O4AA C3BA O5AA C2CA O4AA C8CA O5AA C4CA
SADI K2 O5AA K2 O4AA
RIGU 0.002 0.002 C75B C75A C74B C74A C76B C76A
RIGU 0.002 0.002 O7B C110 C109 C111 C112 O7A C1J C1K C1L C1M
RIGU 0.002 0.002 C114 O8B C115 C116 C113 O8A C1N C1O C1P C1Q
RIGU 0.0005 0.0005 C16A C15B C15A C14B C14A C16B C13
RIGU 0.001 0.001 C45B C45A C44B C44A C46A C46B C43
RIGU 0.001 0.001 K2 O12A O5AA O9B O14B O11A O13A O14A O10B O10A O4AA O13B =
 O11B C1A C1C C1CA C6CA C1B C1I C14 C1D C15 C120 C5CA C125 C1E C126 C127 C1F =
 C1H C119 C118 C2BA C1BA C124 C16 C121 C1G H1AA H1AB H1CA H1CB H1CC H1CD =
 C4CA C2CA H6CA H6CB H1BA H1BB H1IA H1IB O9A C117 H11C H11D H14G H14H H1DA =
 H1DB H15G H15H H12Q H12R O2AA C3CA H12A H12B H1EA H1EB H12C H12D H12E H12F =
 C128 H1FA H1FB H1HA H1HB H11A H11B H11E H11F H2BA H2BB C3BA C8CA H1BC H1BD =
 H12K H12L C123 H16G H16H H12G H12H C122 H1GA H1GB H4CA H4CB H2CA H2CB C0EA =
 H3CA H3CB C7CA H12I H12J O12B H12M H12N H12O H12P H7CA H7CB O3AA C9CA H9CA =
 H9CB C1DA C0DA H1DC H1DD C2DA H0DA H0DB H2DA H2DB
EADP C1P C1Q C1O
EADP O10B O9B O14B
EADP C1I C1H O13B
EADP C14B C16B
EADP C3BA C8CA
EADP C2BA C1BA

L.S. 10
PLAN  5
FREE Y2 C87
FREE K1 C1J
FREE K1 C1M
BIND K2 O12A
FREE K2 C128
FREE K2 C1A
FREE K2 C15
FREE K2 C1E
FREE K2 C1B
FREE K2 C1C
FREE K2 C16
FREE K2 H5Cb
FREE C73 H74d
FREE C73 H75c
FREE C73 H75a
FREE O2AA C3CA
FREE C1P C1N
FREE O4AA C3BA
FREE O4AA C8CA
FREE O5AA C2CA
FREE C113 C116
BIND C75A C73
FREE O10B O11A
FREE C120 C15
BIND C74B C73
BIND O11A K2
FREE O11A C119
BIND C1E O13A
BIND O13A K2
FREE C15B C16B
BIND C8CA C1BA
FREE C1DA C0DA
BOND $H
LIST 6
fmap 2
acta
OMIT 2 2 1
REM <olex2.extras>
REM <HklSrc "%.\\CG4060p2.hkl">
REM </olex2.extras>

WGHT    0.073900   18.137201
FVAR       0.17372   0.60853   0.50216   0.69294   0.77812   0.60743   0.78921
FVAR       0.85904   0.68602
Y1    6    0.746133    0.580946    0.586226    11.00000    0.02548    0.02624 =
         0.01684    0.00210    0.00644   -0.00066
Y2    6    0.761734    0.588162    0.773344    11.00000    0.03395    0.02889 =
         0.01892    0.00071    0.00836    0.00082
K1    3    0.264439    0.757221    0.437635    11.00000    0.06401    0.03988 =
         0.04496    0.01018    0.01160    0.02303
K2    3    0.197807    0.421855    0.811378    11.00000    0.08365    0.06387 =
         0.03443    0.00668   -0.00080   -0.00075
N2    4    0.837197    0.619262    0.554852    11.00000    0.03196    0.03738 =
         0.01754    0.00171    0.00725   -0.00702
N1    4    0.643627    0.615488    0.549815    11.00000    0.02691    0.02994 =
         0.02262    0.00432    0.00944    0.00147
O2    5    0.323189    0.675706    0.482365    11.00000    0.04650    0.03715 =
         0.03595    0.00559    0.00899    0.01286
N3    4    0.749065    0.505542    0.562522    11.00000    0.02683    0.02579 =
         0.01888    0.00286    0.00624    0.00058
O3    5    0.407202    0.733856    0.427636    11.00000    0.05730    0.04604 =
         0.04852    0.01696    0.00880    0.00976
N5    4    0.867419    0.620131    0.806962    11.00000    0.03503    0.03861 =
         0.02180    0.00032    0.00778   -0.00279
N6    4    0.755710    0.518527    0.812439    11.00000    0.05323    0.02967 =
         0.02030    0.00350    0.01070    0.00343
O1    5    0.173541    0.683211    0.460774    11.00000    0.04585    0.07419 =
         0.03233    0.01648    0.01073    0.02371
N4    4    0.669328    0.629557    0.797076    11.00000    0.04558    0.03574 =
         0.02355    0.00034    0.01409    0.00514
O4    5    0.352577    0.819395    0.387966    11.00000    0.08946    0.04032 =
         0.04703    0.01008   -0.00755    0.01000
C69   1    0.778109    0.407939    0.658344    11.00000    0.02986    0.03095 =
         0.02389    0.00245    0.00938    0.00197
AFIX  43
H69   2    0.796998    0.389415    0.632593    11.00000   -1.20000
AFIX   0
C4    1    0.813070    0.558482    0.684294    11.00000    0.03489    0.03636 =
         0.01524    0.00266    0.00725    0.00189
AFIX  43
H4    2    0.855109    0.541182    0.686823    11.00000   -1.20000
AFIX   0
C18   1    0.632738    0.645736    0.503932    11.00000    0.02555    0.02582 =
         0.02705    0.00484    0.00989    0.00267
C68   1    0.772241    0.455342    0.648655    11.00000    0.02230    0.03462 =
         0.01909    0.00550    0.00326    0.00026

O6    5    0.115995    0.768361    0.419867    11.00000    0.06930    0.09277 =
         0.04124    0.02440    0.01578    0.04562
C3    1    0.818419    0.608339    0.682318    11.00000    0.03758    0.03275 =
         0.01598   -0.00010    0.00428   -0.00502
C17   1    0.576951    0.606615    0.574405    11.00000    0.03007    0.03313 =
         0.02413    0.00248    0.00851   -0.00011
AFIX  23
H17A  2    0.577028    0.574560    0.586030    11.00000   -1.20000
H17B  2    0.536537    0.610725    0.546077    11.00000   -1.20000
AFIX   0

O5    5    0.201631    0.826482    0.364777    11.00000    0.08565    0.04978 =
         0.04281    0.00729    0.00275    0.02929
C19   1    0.640631    0.693862    0.508324    11.00000    0.03955    0.03101 =
         0.03511    0.00303    0.01337   -0.00018
C78   1    0.716348    0.485249    0.513155    11.00000    0.02811    0.02402 =
         0.02367    0.00663    0.00279    0.00121
C57   1    0.927730    0.601328    0.780964    11.00000    0.03963    0.03778 =
         0.02008   -0.00231    0.00382   -0.00305
AFIX  23
H57A  2    0.918269    0.568953    0.772706    11.00000   -1.20000
H57B  2    0.970714    0.602926    0.807310    11.00000   -1.20000
AFIX   0
C77   1    0.799087    0.474827    0.596639    11.00000    0.02565    0.02986 =
         0.01865    0.00469    0.00535   -0.00027
AFIX  23
H77A  2    0.843142    0.491766    0.607551    11.00000   -1.20000
H77B  2    0.810873    0.449081    0.573997    11.00000   -1.20000
AFIX   0
C5    1    0.747195    0.534964    0.682567    11.00000    0.03108    0.03127 =
         0.01638    0.00100    0.00991    0.00110
C6    1    0.680095    0.562769    0.675434    11.00000    0.03277    0.03781 =
         0.02154    0.00007    0.01028   -0.00235
AFIX  43
H6    2    0.635712    0.548047    0.671399    11.00000   -1.20000
AFIX   0
C22   1    0.607095    0.655791    0.404997    11.00000    0.05252    0.03827 =
         0.02673    0.00737    0.00530    0.00067
AFIX  43
H22   2    0.594893    0.642915    0.370287    11.00000   -1.20000
AFIX   0
C1    1    0.683731    0.612210    0.674769    11.00000    0.03969    0.02990 =
         0.01749   -0.00010    0.00774   -0.00150
C67   1    0.745205    0.484021    0.687754    11.00000    0.02659    0.03352 =
         0.01885   -0.00040    0.00586   -0.00104
C42   1    0.942613    0.625635    0.728211    11.00000    0.03950    0.03575 =
         0.01961   -0.00588    0.00663   -0.00528
C23   1    0.615280    0.626880    0.450780    11.00000    0.02994    0.03189 =
         0.02923    0.00697    0.00694    0.00279
C2    1    0.750571    0.634560    0.678216    11.00000    0.05042    0.02770 =
         0.01897    0.00284    0.00455    0.00020
AFIX  43
H2    2    0.752085    0.666688    0.677904    11.00000   -1.20000
AFIX   0
C79   1    0.643217    0.472854    0.505677    11.00000    0.02705    0.02177 =
         0.03647    0.00590    0.00251    0.00143
C12   1    0.602080    0.669108    0.714050    11.00000    0.05768    0.03129 =
         0.02910    0.00353    0.01367    0.00659
C8    1    0.565115    0.636986    0.623454    11.00000    0.03791    0.03392 =
         0.02572    0.00433    0.01322    0.00239
C48   1    0.885955    0.614152    0.515307    11.00000    0.02275    0.04159 =
         0.02233    0.00141    0.00370   -0.01186
C71   1    0.727193    0.415794    0.741603    11.00000    0.03587    0.03892 =
         0.02371    0.00628    0.01239   -0.00733
AFIX  43
H71   2    0.710555    0.402572    0.772277    11.00000   -1.20000
AFIX   0
C72   1    0.721121    0.463355    0.734634    11.00000    0.03122    0.03575 =
         0.02182    0.00119    0.00894   -0.00272
C20   1    0.632711    0.721388    0.461326    11.00000    0.06420    0.02651 =
         0.04358    0.00807    0.01724   -0.00102
AFIX  43
H20   2    0.638545    0.753196    0.465096    11.00000   -1.20000
AFIX   0
C70   1    0.756752    0.387192    0.705169    11.00000    0.03391    0.03294 =
         0.02704    0.00372    0.00805   -0.00632
C83   1    0.755669    0.479173    0.467603    11.00000    0.03644    0.03213 =
         0.02172    0.00639    0.00559    0.00026
C88   1    0.792845    0.491803    0.855735    11.00000    0.06518    0.02640 =
         0.02204   -0.00027    0.00784   -0.00236
C7    1    0.615714    0.639799    0.670105    11.00000    0.04142    0.02840 =
         0.02747    0.00262    0.01372    0.00182
C38   1    0.904860    0.657092    0.636990    11.00000    0.05266    0.03546 =
         0.01891   -0.00399    0.00753   -0.01410
C62   1    0.929018    0.652530    0.951958    11.00000    0.06276    0.04156 =
         0.02015    0.00102    0.00756   -0.00209
AFIX  43
H62   2    0.947172    0.638046    0.984654    11.00000   -1.20000
AFIX   0
C41   1    1.011335    0.642688    0.724287    11.00000    0.04139    0.05082 =
         0.02339   -0.00905    0.00552   -0.00940
AFIX  43
H41   2    1.046676    0.638510    0.754003    11.00000   -1.20000
AFIX   0
C37   1    0.888846    0.631069    0.682952    11.00000    0.03916    0.03169 =
         0.01983   -0.00270    0.00498   -0.00597
C87   1    0.696774    0.492701    0.780240    11.00000    0.04649    0.03807 =
         0.02539    0.00593    0.01783    0.00129
AFIX  23
H87A  2    0.660948    0.514536    0.764170    11.00000   -1.20000
H87B  2    0.674133    0.472843    0.804996    11.00000   -1.20000
AFIX   0
C80   1    0.611325    0.457970    0.453746    11.00000    0.02981    0.02935 =
         0.05138    0.00966   -0.01108   -0.00229
AFIX  43
H80   2    0.562587    0.450995    0.449189    11.00000   -1.20000
AFIX   0
C53   1    0.873260    0.638642    0.464733    11.00000    0.02439    0.04892 =
         0.02064    0.00392    0.00504   -0.00533
C84   1    0.599782    0.475786    0.553096    11.00000    0.03075    0.03191 =
         0.06021   -0.00206    0.01558   -0.00216
AFIX 137
H84A  2    0.630644    0.471404    0.586992    11.00000   -1.50000
H84B  2    0.563508    0.452216    0.549396    11.00000   -1.50000
H84C  2    0.577402    0.505615    0.553244    11.00000   -1.50000
AFIX   0
C63   1    0.914846    0.625945    0.904477    11.00000    0.05375    0.03216 =
         0.02121   -0.00239    0.01071   -0.00238

PART 7
O14A  5    0.225555    0.398743    0.705616    31.00000    0.02453    0.10613 =
         0.05071   -0.01083    0.01022   -0.00584

PART 0
C21   1    0.616543    0.702997    0.409556    11.00000    0.06776    0.03259 =
         0.03806    0.01307    0.01388    0.00159
C26   1    0.608465    0.575644    0.443334    11.00000    0.05611    0.03217 =
         0.02710    0.00185   -0.00148    0.00042
AFIX 137
H26A  2    0.654452    0.561413    0.453197    11.00000   -1.50000
H26B  2    0.591644    0.568841    0.405551    11.00000   -1.50000
H26C  2    0.574927    0.563824    0.466480    11.00000   -1.50000
AFIX   0
C54   1    0.962287    0.557932    0.576839    11.00000    0.03517    0.04785 =
         0.03319    0.00887    0.00196   -0.00683
AFIX 137
H54A  2    0.978342    0.578585    0.606519    11.00000   -1.50000
H54B  2    0.999170    0.535655    0.572752    11.00000   -1.50000
H54C  2    0.919658    0.542252    0.584758    11.00000   -1.50000
AFIX   0
C61   1    0.917171    0.699417    0.952313    11.00000    0.04859    0.03954 =
         0.03285   -0.01018    0.01785   -0.00849
C58   1    0.887767    0.646877    0.854431    11.00000    0.03191    0.03586 =
         0.02222   -0.00031    0.00845   -0.00235
C89   1    0.855057    0.466570    0.849477    11.00000    0.04824    0.02895 =
         0.03535   -0.00212   -0.00300   -0.00651
C82   1    0.721610    0.463233    0.417495    11.00000    0.05397    0.04295 =
         0.02083    0.00621    0.00645   -0.00570
AFIX  43
H82   2    0.748719    0.459152    0.388502    11.00000   -1.20000
AFIX   0
C47   1    0.849526    0.662438    0.586557    11.00000    0.05095    0.03626 =
         0.02095    0.00531    0.01068   -0.01078
AFIX  23
H47A  2    0.804502    0.672624    0.598179    11.00000   -1.20000
H47B  2    0.865568    0.686175    0.562879    11.00000   -1.20000
AFIX   0
C56   1    0.807534    0.668104    0.452406    11.00000    0.02844    0.05455 =
         0.02288    0.00698    0.00672   -0.00191
AFIX 137
H56A  2    0.766033    0.650848    0.459671    11.00000   -1.50000
H56B  2    0.802338    0.677163    0.414385    11.00000   -1.50000
H56C  2    0.812147    0.695166    0.475268    11.00000   -1.50000
AFIX   0
C11   1    0.538069    0.693783    0.709436    11.00000    0.06930    0.04746 =
         0.03471   -0.00420    0.02158    0.01812
AFIX  43
H11   2    0.529691    0.713223    0.738234    11.00000   -1.20000
AFIX   0
C49   1    0.946106    0.585089    0.524241    11.00000    0.02799    0.04779 =
         0.02410    0.00347    0.00327   -0.00884
C86   1    0.833649    0.492913    0.472397    11.00000    0.03724    0.05668 =
         0.02293    0.00315    0.01308   -0.00173
AFIX 137
H86A  2    0.837367    0.526001    0.471959    11.00000   -1.50000
H86B  2    0.855017    0.480273    0.441990    11.00000   -1.50000
H86C  2    0.858232    0.481214    0.506297    11.00000   -1.50000
AFIX   0
C28   1    0.623064    0.621663    0.837759    11.00000    0.04158    0.03766 =
         0.02577    0.00207    0.01070    0.01542
C39   1    0.973864    0.673337    0.635939    11.00000    0.06213    0.04906 =
         0.02339   -0.00501    0.01309   -0.02842
AFIX  43
H39   2    0.983656    0.690324    0.605471    11.00000   -1.20000
AFIX   0
C9    1    0.501428    0.662168    0.621705    11.00000    0.03742    0.05976 =
         0.03375   -0.00036    0.01174    0.01074
AFIX  43
H9    2    0.467634    0.659615    0.590709    11.00000   -1.20000
AFIX   0
C81   1    0.649352    0.453237    0.409040    11.00000    0.05523    0.04415 =
         0.02583    0.00805   -0.00777   -0.00968

PART 8
O13B  5    0.161263    0.473933    0.714729   -31.00000    0.20979    0.08789 =
         0.04012    0.00451   -0.00013    0.06523

PART 0
C32   1    0.600276    0.630135    0.932545    11.00000    0.05075    0.08502 =
         0.02412   -0.00147    0.01195    0.01872
AFIX  43
H32   2    0.613402    0.642503    0.967406    11.00000   -1.20000
AFIX   0
C33   1    0.643069    0.639216    0.891462    11.00000    0.04116    0.05025 =
         0.02674    0.00217    0.00876    0.01808
C52   1    0.920649    0.633244    0.425603    11.00000    0.03036    0.07139 =
         0.02332    0.01017    0.00704   -0.00050
AFIX  43
H52   2    0.912090    0.649475    0.392647    11.00000   -1.20000
AFIX   0
C60   1    0.891209    0.720033    0.903168    11.00000    0.04339    0.02889 =
         0.04971   -0.00368    0.00761   -0.00090
AFIX  43
H60   2    0.883079    0.751749    0.902455    11.00000   -1.20000
AFIX   0
C94   1    0.887472    0.466413    0.796541    11.00000    0.04167    0.04546 =
         0.04202    0.00024    0.00663   -0.00159
AFIX 137
H94A  2    0.871531    0.439529    0.775507    11.00000   -1.50000
H94B  2    0.938858    0.465903    0.804331    11.00000   -1.50000
H94C  2    0.872809    0.493708    0.775845    11.00000   -1.50000
AFIX   0
C27   1    0.654640    0.672884    0.766627    11.00000    0.06303    0.03236 =
         0.02801   -0.00392    0.01145    0.00452
AFIX  23
H27A  2    0.699699    0.685020    0.757123    11.00000   -1.20000
H27B  2    0.635811    0.695112    0.790836    11.00000   -1.20000
AFIX   0

C97   1    0.207647    0.655925    0.504850    11.00000    0.05353    0.06017 =
         0.03496    0.01711    0.00610    0.01136
AFIX  23
H97A  2    0.176704    0.630418    0.512283    11.00000   -1.20000
H97B  2    0.216686    0.674567    0.537921    11.00000   -1.20000
AFIX   0

C36   1    0.712383    0.665354    0.904287    11.00000    0.03989    0.07430 =
         0.02445   -0.00382    0.00282    0.01736
AFIX 137
H36A  2    0.752059    0.644642    0.902800    11.00000   -1.50000
H36B  2    0.714800    0.678500    0.940488    11.00000   -1.50000
H36C  2    0.714529    0.689602    0.877761    11.00000   -1.50000
AFIX   0
C40   1    1.029459    0.665675    0.677940    11.00000    0.05264    0.05185 =
         0.02670   -0.01340    0.01452   -0.02582

C99   1    0.389341    0.660534    0.465808    11.00000    0.05603    0.04649 =
         0.04722    0.01460    0.01420    0.02455
AFIX  23
H99A  2    0.380983    0.647140    0.429244    11.00000   -1.20000
H99B  2    0.410434    0.636986    0.490998    11.00000   -1.20000
AFIX   0

C50   1    0.991367    0.580555    0.483495    11.00000    0.02716    0.06432 =
         0.03811    0.01119    0.00695    0.00685
AFIX  43
H50   2    1.030575    0.560757    0.489583    11.00000   -1.20000
AFIX   0
C73   1    0.767573    0.335037    0.715535    11.00000    0.05994    0.03669 =
         0.03077    0.01034    0.01572   -0.00157
C25   1    0.658674    0.716645    0.563727    11.00000    0.07268    0.02952 =
         0.04259   -0.00256    0.00883   -0.00236
AFIX 137
H25A  2    0.615854    0.729414    0.575463    11.00000   -1.50000
H25B  2    0.692953    0.740890    0.560915    11.00000   -1.50000
H25C  2    0.678700    0.694131    0.590071    11.00000   -1.50000
AFIX   0
C59   1    0.876719    0.694961    0.854489    11.00000    0.04167    0.03348 =
         0.03855    0.00181    0.00057   -0.00712
C51   1    0.979869    0.604640    0.434044    11.00000    0.03007    0.07920 =
         0.03194    0.00986    0.01370    0.00561
C34   1    0.533049    0.577186    0.771585    11.00000    0.05177    0.05517 =
         0.04604   -0.01123    0.02036   -0.00795
AFIX 137
H34A  2    0.496688    0.597334    0.753822    11.00000   -1.50000
H34B  2    0.513182    0.546930    0.775257    11.00000   -1.50000
H34C  2    0.572208    0.575327    0.749863    11.00000   -1.50000
AFIX   0
C29   1    0.559819    0.595954    0.827744    11.00000    0.04636    0.04286 =
         0.03395   -0.00120    0.01494    0.00904

C98   1    0.276610    0.637843    0.489322    11.00000    0.05439    0.03753 =
         0.03520    0.00927    0.00246    0.00943
AFIX  23
H98A  2    0.298784    0.617388    0.517897    11.00000   -1.20000
H98B  2    0.267797    0.620398    0.455314    11.00000   -1.20000
AFIX   0

PART 8
O11B  5    0.157717    0.459774    0.911715   -31.00000    0.08547    0.04640 =
         0.04998   -0.00994    0.02300   -0.00882

PART 0
C10   1    0.486396    0.690944    0.664431    11.00000    0.05367    0.07089 =
         0.03804   -0.00172    0.01718    0.02482
C31   1    0.539136    0.603534    0.923748    11.00000    0.05079    0.08465 =
         0.03836    0.00393    0.02397    0.01071

C100  1    0.439439    0.700518    0.465656    11.00000    0.05116    0.05822 =
         0.06682    0.02732    0.01126    0.01666
AFIX  23
H10A  2    0.448270    0.713890    0.502210    11.00000   -1.20000
H10B  2    0.484940    0.690412    0.454814    11.00000   -1.20000
AFIX   0

C66   1    0.923164    0.574103    0.907598    11.00000    0.10312    0.03633 =
         0.02528   -0.00007   -0.00418    0.00721
AFIX 137
H66A  2    0.934384    0.564906    0.945367    11.00000   -1.50000
H66B  2    0.961250    0.564735    0.887189    11.00000   -1.50000
H66C  2    0.879151    0.559686    0.892223    11.00000   -1.50000
AFIX   0
C30   1    0.519439    0.586915    0.871075    11.00000    0.05124    0.06337 =
         0.04362    0.00047    0.02222    0.00254
AFIX  43
H30   2    0.478017    0.569149    0.864170    11.00000   -1.20000
AFIX   0
C55   1    1.030642    0.598891    0.390475    11.00000    0.04225    0.11847 =
         0.04754    0.02611    0.02647    0.02246
AFIX 137
H55A  2    1.013078    0.616490    0.358369    11.00000   -1.50000
H55B  2    1.033252    0.566832    0.380797    11.00000   -1.50000
H55C  2    1.077581    0.609727    0.404812    11.00000   -1.50000
AFIX   0
C93   1    0.766668    0.491428    0.907819    11.00000    0.09580    0.04178 =
         0.02406   -0.00185    0.01480    0.00859

C107  1    0.074069    0.728647    0.424107    11.00000    0.05957    0.11607 =
         0.04057    0.02268    0.01833    0.04744
AFIX  23
H10C  2    0.072555    0.710562    0.390607    11.00000   -1.20000
H10D  2    0.025348    0.737512    0.428795    11.00000   -1.20000
AFIX   0
C106  1    0.086407    0.799054    0.377767    11.00000    0.07791    0.10509 =
         0.04161    0.02987    0.01795    0.05970
AFIX  23
H10E  2    0.038555    0.808416    0.384305    11.00000   -1.20000
H10F  2    0.083051    0.783808    0.342240    11.00000   -1.20000
AFIX   0

C64   1    0.849791    0.719549    0.801820    11.00000    0.09435    0.03790 =
         0.06675    0.01346   -0.02751   -0.01802
AFIX 137
H64A  2    0.881063    0.713050    0.774545    11.00000   -1.50000
H64B  2    0.848953    0.752247    0.808384    11.00000   -1.50000
H64C  2    0.802171    0.709042    0.788917    11.00000   -1.50000
AFIX   0
C90   1    0.889328    0.442487    0.894540    11.00000    0.05835    0.05299 =
         0.04320    0.00413   -0.00985   -0.00037
AFIX  43
H90   2    0.930630    0.425879    0.890040    11.00000   -1.20000
AFIX   0

C101  1    0.452080    0.772793    0.423388    11.00000    0.06968    0.05266 =
         0.07306    0.01986   -0.00039    0.00070
AFIX  23
H10G  2    0.499947    0.762851    0.417624    11.00000   -1.20000
H10H  2    0.455534    0.790856    0.457004    11.00000   -1.20000
AFIX   0

C65   1    0.931540    0.727299    1.005085    11.00000    0.09219    0.05410 =
         0.03829   -0.01748    0.02287   -0.00825
AFIX 137
H65A  2    0.892546    0.723211    1.026603    11.00000   -1.50000
H65B  2    0.935798    0.759427    0.996227    11.00000   -1.50000
H65C  2    0.975362    0.716886    1.025790    11.00000   -1.50000
AFIX   0
C92   1    0.804149    0.466771    0.950970    11.00000    0.11706    0.06884 =
         0.02254    0.00433    0.00957    0.00281
AFIX  43
H92   2    0.787170    0.467043    0.985108    11.00000   -1.20000
AFIX   0

PART 8
O12B  5    0.099730    0.499821    0.811905   -31.00000    0.05567    0.05409 =
         0.04335    0.01086   -0.00534    0.00741

PART 0
C108  1    0.105406    0.700316    0.472193    11.00000    0.05497    0.09646 =
         0.04797    0.02427    0.01888    0.03313
AFIX  23
H10I  2    0.111329    0.719108    0.505266    11.00000   -1.20000
H10J  2    0.073719    0.674754    0.477936    11.00000   -1.20000
AFIX   0

C85   1    0.612587    0.438938    0.353014    11.00000    0.08461    0.08708 =
         0.03528    0.00373   -0.01737   -0.02117
AFIX 137
H85A  2    0.563679    0.430659    0.355975    11.00000   -1.50000
H85B  2    0.637199    0.412885    0.339866    11.00000   -1.50000
H85C  2    0.613583    0.464209    0.327696    11.00000   -1.50000
AFIX   0

C102  1    0.419618    0.801329    0.375517    11.00000    0.08257    0.05439 =
         0.06175    0.01910    0.00685   -0.00250
AFIX  23
H10K  2    0.451684    0.826466    0.368931    11.00000   -1.20000
H10L  2    0.412116    0.782404    0.342593    11.00000   -1.20000
AFIX   0

C91   1    0.865214    0.442055    0.945139    11.00000    0.08885    0.07362 =
         0.03794    0.01416   -0.01040    0.01031
C24   1    0.611070    0.733153    0.358616    11.00000    0.14973    0.04278 =
         0.04452    0.02173    0.02118    0.00178
AFIX 137
H24A  2    0.656208    0.733101    0.343935    11.00000   -1.50000
H24B  2    0.599232    0.764173    0.368123    11.00000   -1.50000
H24C  2    0.574301    0.721299    0.331504    11.00000   -1.50000
AFIX   0
C35   1    0.494408    0.592436    0.969831    11.00000    0.07537    0.15367 =
         0.04999    0.00368    0.03844   -0.00423
AFIX 137
H35A  2    0.506692    0.562192    0.984145    11.00000   -1.50000
H35B  2    0.444379    0.593230    0.955741    11.00000   -1.50000
H35C  2    0.503916    0.614878    0.998702    11.00000   -1.50000
AFIX   0

C103  1    0.317714    0.846952    0.344421    11.00000    0.09461    0.04826 =
         0.07362    0.02827   -0.02139   -0.00010
AFIX  23
H10M  2    0.308630    0.828630    0.311096    11.00000   -1.20000
H10N  2    0.348190    0.872762    0.337195    11.00000   -1.20000
AFIX   0

PART 5
C114  1    0.552331    0.408916    0.667172    51.00000    0.06642    0.08075 =
         0.06267   -0.01290    0.02078   -0.02680
AFIX  23
H11M  2    0.528460    0.397419    0.632423    51.00000   -1.20000
H11N  2    0.603824    0.408988    0.666114    51.00000   -1.20000
AFIX   0

PART 0
C105  1    0.133893    0.840171    0.378133    11.00000    0.11166    0.07752 =
         0.04617    0.01163    0.00099    0.06187
AFIX  23
H10O  2    0.112816    0.862691    0.351552    11.00000   -1.20000
H10P  2    0.139088    0.854421    0.414284    11.00000   -1.20000
AFIX   0
C104  1    0.249117    0.864245    0.360555    11.00000    0.12140    0.03878 =
         0.08484    0.01701   -0.02542    0.01795
AFIX  23
H10Q  2    0.257853    0.880104    0.395662    11.00000   -1.20000
H10R  2    0.227613    0.886054    0.333262    11.00000   -1.20000
AFIX   0

PART 7
C125  1    0.140403    0.454681    0.670992    31.00000    0.06827    0.09932 =
         0.03886    0.01285    0.00517   -0.00440
AFIX  23
H12A  2    0.126929    0.476090    0.640994    31.00000   -1.20000
H12B  2    0.103180    0.431410    0.670866    31.00000   -1.20000
AFIX   0
O9A   5    0.312451    0.358293    0.794280    31.00000    0.08071    0.05063 =
         0.13785    0.00091   -0.00818    0.00478

PART 0
C96   1    0.701734    0.518790    0.916314    11.00000    0.13455    0.06656 =
         0.03845    0.01120    0.04425    0.03613
AFIX 137
H96A  2    0.710036    0.550828    0.909075    11.00000   -1.50000
H96B  2    0.691852    0.515251    0.953656    11.00000   -1.50000
H96C  2    0.661452    0.507929    0.891687    11.00000   -1.50000
AFIX   0
PART 17
C46A  1    1.156748    0.679785    0.724230    91.00000    0.05266    0.11577 =
         0.04391   -0.00914    0.01781   -0.03338
AFIX 137
H46A  2    1.137760    0.700870    0.749062    91.00000   -1.50000
H46B  2    1.203249    0.690206    0.717020    91.00000   -1.50000
H46C  2    1.160884    0.649565    0.740515    91.00000   -1.50000
AFIX   0
PART 0
PART 3
C76A  1    0.757376    0.318681    0.772518    21.00000    0.05190    0.03419 =
         0.03676    0.01525    0.00930    0.00667
AFIX 137
H76A  2    0.787048    0.336665    0.799330    21.00000   -1.50000
H76B  2    0.770636    0.286693    0.776396    21.00000   -1.50000
H76C  2    0.707948    0.322265    0.778132    21.00000   -1.50000
AFIX   0
PART 0
C13   1    0.416548    0.718025    0.663969    11.00000    0.07653    0.13625 =
         0.06024   -0.02036    0.01214    0.06079

PART 7
C126  1    0.211892    0.432324    0.664880    31.00000    0.06225    0.12666 =
         0.04999    0.00105    0.00831   -0.00516
AFIX  23
H12C  2    0.210413    0.418294    0.628758    31.00000   -1.20000
H12D  2    0.249664    0.455404    0.668732    31.00000   -1.20000
AFIX   0

PART 0
C43   1    1.107507    0.677781    0.671479    11.00000    0.05534    0.08951 =
         0.03996   -0.01612    0.01984   -0.03753

PART 5
O8B   5    0.466424    0.405821    0.727863    51.00000    0.14452    0.16385 =
         0.15253   -0.03012    0.09893   -0.04061

PART 0
PART 7
C127  1    0.289218    0.376041    0.696965    31.00000    0.04400    0.13418 =
         0.11492   -0.03079    0.02164    0.01532
AFIX  23
H12E  2    0.329007    0.397610    0.698789    31.00000   -1.20000
H12F  2    0.284142    0.360760    0.661417    31.00000   -1.20000
AFIX   0
O10A  5    0.264708    0.367583    0.897628    31.00000    0.09878    0.11188 =
         0.09323    0.06299   -0.03293   -0.02455

PART 0
PART 17
C44A  1    1.110689    0.724728    0.641855    91.00000    0.06844    0.09812 =
         0.04282   -0.00742    0.02326   -0.04643
AFIX 137
H44A  2    1.084883    0.722585    0.605561    91.00000   -1.50000
H44B  2    1.159836    0.732617    0.639237    91.00000   -1.50000
H44C  2    1.089327    0.748168    0.662350    91.00000   -1.50000
AFIX   0
PART 0
PART 15
C15A  1    0.433727    0.769335    0.668932    81.00000    0.08310    0.13076 =
         0.16578   -0.01573    0.00289    0.07256
AFIX 137
H15A  2    0.465097    0.774894    0.702310    81.00000   -1.50000
H15B  2    0.390077    0.786499    0.669651    81.00000   -1.50000
H15C  2    0.456849    0.779003    0.637966    81.00000   -1.50000
AFIX   0
C14A  1    0.363159    0.706753    0.615992    81.00000    0.07010    0.19479 =
         0.07514   -0.03829    0.00276    0.07913
AFIX 137
H14A  2    0.379741    0.718193    0.582960    81.00000   -1.50000
H14B  2    0.318033    0.720928    0.620588    81.00000   -1.50000
H14C  2    0.357147    0.673844    0.613373    81.00000   -1.50000
AFIX   0

PART 0
PART 5
C115  1    0.524993    0.456529    0.680536    51.00000    0.04770    0.09693 =
         0.07655   -0.03441    0.01662   -0.02166
AFIX  23
H11O  2    0.563376    0.474960    0.699734    51.00000   -1.20000
H11P  2    0.505843    0.472569    0.647124    51.00000   -1.20000
AFIX   0

PART 0
C95   1    0.903906    0.414976    0.993235    11.00000    0.14287    0.16305 =
         0.06165    0.04585   -0.02155    0.04033
AFIX 137
H95A  2    0.912639    0.384020    0.981593    11.00000   -1.50000
H95B  2    0.874682    0.414110    1.022778    11.00000   -1.50000
H95C  2    0.948803    0.429718    1.005672    11.00000   -1.50000
AFIX   0

PART 5
C116  1    0.469558    0.448530    0.715036    51.00000    0.06172    0.16124 =
         0.05684   -0.02785    0.01960   -0.02653
AFIX  23
H11Q  2    0.479078    0.466894    0.748295    51.00000   -1.20000
H11R  2    0.423682    0.458195    0.695838    51.00000   -1.20000
AFIX   0

PART 0
PART 3
C74A  1    0.850120    0.322340    0.712166    21.00000    0.07821    0.04813 =
         0.11290    0.04657    0.05988    0.03826
AFIX 137
H74A  2    0.861642    0.328641    0.675748    21.00000   -1.50000
H74B  2    0.857845    0.290151    0.720388    21.00000   -1.50000
H74C  2    0.880270    0.340629    0.738346    21.00000   -1.50000
AFIX   0

PART 0
PART 8
C121  1    0.095613    0.486046    0.906846   -31.00000    0.08624    0.06208 =
         0.04392   -0.01240    0.01832   -0.00555
AFIX  23
H12G  2    0.090587    0.501446    0.941373   -31.00000   -1.20000
H12H  2    0.053899    0.466589    0.897095   -31.00000   -1.20000
AFIX   0

PART 0
PART 17
C45A  1    1.133603    0.640979    0.632542    91.00000    0.07126    0.10580 =
         0.05748   -0.02215    0.03643   -0.03369
AFIX 137
H45A  2    1.130640    0.610875    0.648606    91.00000   -1.50000
H45B  2    1.182468    0.647298    0.627160    91.00000   -1.50000
H45C  2    1.103885    0.641942    0.597711    91.00000   -1.50000
AFIX   0
PART 0
PART 3
C75A  1    0.724382    0.306550    0.673010    21.00000    0.17232    0.02569 =
         0.04231    0.00661   -0.02739   -0.02057
AFIX 137
H75A  2    0.733625    0.274389    0.680499    21.00000   -1.50000
H75B  2    0.737366    0.314075    0.637327    21.00000   -1.50000
H75C  2    0.674278    0.312798    0.673757    21.00000   -1.50000
AFIX   0

PART 0
PART 7
C128  1    0.300320    0.342090    0.742061    31.00000    0.04343    0.12008 =
         0.14174   -0.02057    0.00951    0.01755
AFIX  23
H12I  2    0.258316    0.322308    0.739510    31.00000   -1.20000
H12J  2    0.340736    0.322764    0.735731    31.00000   -1.20000
AFIX   0

PART 0
PART 5
C113  1    0.532185    0.381184    0.715217    51.00000    0.10199    0.12832 =
         0.08096    0.00531    0.03168   -0.04173
AFIX  23
H11S  2    0.521927    0.349261    0.704984    51.00000   -1.20000
H11T  2    0.569767    0.382121    0.746174    51.00000   -1.20000
AFIX   0

PART 0
PART 8
C124  1    0.104093    0.503744    0.713690   -31.00000    0.15857    0.04996 =
         0.04628    0.01106    0.00307    0.01982
AFIX  23
H12K  2    0.059786    0.486367    0.706089   -31.00000   -1.20000
H12L  2    0.105945    0.525814    0.684058   -31.00000   -1.20000
AFIX   0

PART 0
PART 15
C16A  1    0.383962    0.705340    0.717663    81.00000    0.09276    0.22572 =
         0.07648    0.00780    0.02905    0.07745
AFIX 137
H16A  2    0.376356    0.672561    0.718861    81.00000   -1.50000
H16B  2    0.338981    0.721056    0.718056    81.00000   -1.50000
H16C  2    0.416492    0.714594    0.749120    81.00000   -1.50000
AFIX   0

PART 0
PART 8
C123  1    0.103655    0.529569    0.767178   -31.00000    0.07877    0.04992 =
         0.04796    0.01049   -0.00098    0.01063
AFIX  23
H12M  2    0.146973    0.548036    0.773970   -31.00000   -1.20000
H12N  2    0.062912    0.550441    0.764030   -31.00000   -1.20000
AFIX   0
C122  1    0.102287    0.521298    0.861927   -31.00000    0.05057    0.07283 =
         0.05174   -0.00215    0.00837   -0.00472
AFIX  23
H12O  2    0.063482    0.543542    0.860951   -31.00000   -1.20000
H12P  2    0.147336    0.537835    0.869797   -31.00000   -1.20000
AFIX   0

PART 0
PART 4
C74B  1    0.799399    0.312727    0.671053   -21.00000    0.18491    0.01847 =
         0.04844    0.00571    0.04867    0.01995
AFIX 137
H74D  2    0.801947    0.279991    0.677404   -21.00000   -1.50000
H74E  2    0.846860    0.324694    0.669718   -21.00000   -1.50000
H74F  2    0.770384    0.318779    0.636697   -21.00000   -1.50000
AFIX   0
C75B  1    0.688969    0.317045    0.714725   -21.00000    0.10620    0.03950 =
         0.16236    0.03551    0.02615   -0.00651
AFIX 137
H75D  2    0.664191    0.335656    0.738832   -21.00000   -1.50000
H75E  2    0.689817    0.285487    0.726911   -21.00000   -1.50000
H75F  2    0.664597    0.318936    0.677936   -21.00000   -1.50000
AFIX   0
C76B  1    0.802147    0.329755    0.772704   -21.00000    0.19311    0.06121 =
         0.04142    0.00381    0.00515    0.08086
AFIX 137
H76D  2    0.848551    0.344183    0.776440   -21.00000   -1.50000
H76E  2    0.807461    0.297494    0.781442   -21.00000   -1.50000
H76F  2    0.772917    0.344153    0.797412   -21.00000   -1.50000
AFIX   0

PART 0
PART 7
O12A  5    0.095204    0.478528    0.828211    31.00000    0.09681    0.09587 =
         0.06931   -0.01418    0.02055    0.01502
PART 0
PART 8
C14   1    0.231853    0.417316    0.673759   -31.00000    0.12769    0.07529 =
         0.03490   -0.00871   -0.01600    0.02173
AFIX  23
H14G  2    0.233343    0.400188    0.639843   -31.00000   -1.20000
H14H  2    0.276032    0.434925    0.680563   -31.00000   -1.20000
AFIX   0
O10B  5    0.210828    0.371499    0.910028   -31.00000    0.18678    0.07644 =
         0.03561   -0.00603   -0.00808    0.04827
PART 0
PART 7
C15   1    0.114465    0.454442    0.919499    31.00000    0.13344    0.14218 =
         0.05195   -0.03217    0.01324   -0.01695
AFIX  23
H15G  2    0.111039    0.464595    0.956863    31.00000   -1.20000
H15H  2    0.079372    0.430043    0.911130    31.00000   -1.20000
AFIX   0
PART 0
PART 8
C16   1    0.171329    0.449762    0.665920   -31.00000    0.12965    0.06410 =
         0.03527    0.00870    0.00064    0.01761
AFIX  23
H16G  2    0.179603    0.471894    0.637598   -31.00000   -1.20000
H16H  2    0.127839    0.432833    0.653176   -31.00000   -1.20000
AFIX   0
PART 0
PART 7
O11A  5    0.181297    0.435963    0.917988    31.00000    0.12675    0.18733 =
         0.03826    0.01696    0.01203   -0.00931
PART 0
PART 8
O9B   5    0.277501    0.344774    0.815067   -31.00000    0.18678    0.07644 =
         0.03561   -0.00603   -0.00808    0.04827
PART 0
PART 7
O13A  5    0.149858    0.478774    0.722792    31.00000    0.06066    0.05346 =
         0.05009    0.01525   -0.00792   -0.01143
C1A   1    0.085137    0.513306    0.790206    31.00000    0.07540    0.10425 =
         0.09092    0.00119    0.01441    0.01249
AFIX  23
H1AA  2    0.124842    0.534848    0.796980    31.00000   -1.20000
H1AB  2    0.041644    0.529865    0.795700    31.00000   -1.20000
AFIX   0
PART 0
PART 8
C1B   1    0.279214    0.323452    0.763116   -31.00000    0.18310    0.06804 =
         0.03682   -0.01020   -0.00584    0.03486
AFIX  23
H1BA  2    0.234944    0.306322    0.753886   -31.00000   -1.20000
H1BB  2    0.318404    0.301379    0.766166   -31.00000   -1.20000
AFIX   0
O14B  5    0.229644    0.386828    0.715375   -31.00000    0.18678    0.07644 =
         0.03561   -0.00603   -0.00808    0.04827
PART 0
PART 7
C1C   1    0.093761    0.494513    0.881167    31.00000    0.13031    0.13007 =
         0.07689   -0.02847    0.03743   -0.00350
AFIX  23
H1CA  2    0.046075    0.505484    0.885917    31.00000   -1.20000
H1CB  2    0.127411    0.519817    0.888829    31.00000   -1.20000
AFIX   0
PART 0
PART 8
C1D   1    0.288175    0.356063    0.716863   -31.00000    0.14814    0.07096 =
         0.03053   -0.01016   -0.02068    0.02642
AFIX  23
H1DA  2    0.333345    0.372590    0.723818   -31.00000   -1.20000
H1DB  2    0.286965    0.339491    0.682303   -31.00000   -1.20000
AFIX   0
PART 0
PART 7
C1E   1    0.079514    0.498215    0.732325    31.00000    0.08922    0.09256 =
         0.08279    0.01355    0.00995    0.02307
AFIX  23
H1EA  2    0.067378    0.524235    0.707954    31.00000   -1.20000
H1EB  2    0.042287    0.474978    0.725132    31.00000   -1.20000
AFIX   0
C120  1    0.186832    0.400045    0.955025    31.00000    0.12826    0.25833 =
         0.05577    0.06692   -0.01399   -0.01296
AFIX  23
H12Q  2    0.151648    0.376139    0.944285    31.00000   -1.20000
H12R  2    0.181384    0.410629    0.991893    31.00000   -1.20000
AFIX   0
C119  1    0.260672    0.383670    0.951208    31.00000    0.12472    0.19244 =
         0.08472    0.06282   -0.01886   -0.02847
AFIX  23
H11A  2    0.294495    0.408761    0.959733    31.00000   -1.20000
H11B  2    0.272844    0.358967    0.977502    31.00000   -1.20000
AFIX   0
C117  1    0.330950    0.325264    0.837960    31.00000    0.09987    0.08717 =
         0.17728    0.04107   -0.02465   -0.00207
AFIX  23
H11C  2    0.378308    0.312728    0.835203    31.00000   -1.20000
H11D  2    0.296842    0.299932    0.834262    31.00000   -1.20000
AFIX   0
C118  1    0.330246    0.347812    0.892849    31.00000    0.12054    0.08021 =
         0.15546    0.06601   -0.01703   -0.01076
AFIX  23
H11E  2    0.341043    0.324940    0.921659    31.00000   -1.20000
H11F  2    0.367222    0.371393    0.897680    31.00000   -1.20000
AFIX   0
PART 0
PART 8
C1F   1    0.215546    0.395914    0.958489   -31.00000    0.16123    0.07283 =
         0.03121    0.00038    0.01550    0.01047
AFIX  23
H1FA  2    0.259138    0.414238    0.963559   -31.00000   -1.20000
H1FB  2    0.215210    0.375226    0.989648   -31.00000   -1.20000
AFIX   0
C1G   1    0.150315    0.426466    0.952532   -31.00000    0.14615    0.05555 =
         0.03476   -0.00932    0.02255   -0.00744
AFIX  23
H1GA  2    0.107557    0.408087    0.942198   -31.00000   -1.20000
H1GB  2    0.145620    0.441590    0.987285   -31.00000   -1.20000
AFIX   0
C1H   1    0.270857    0.340935    0.913852   -31.00000    0.20979    0.08789 =
         0.04012    0.00451   -0.00013    0.06523
AFIX  23
H1HA  2    0.268811    0.319017    0.943613   -31.00000   -1.20000
H1HB  2    0.315426    0.358142    0.920598   -31.00000   -1.20000
AFIX   0
C1I   1    0.266011    0.315899    0.858665   -31.00000    0.20979    0.08789 =
         0.04012    0.00451   -0.00013    0.06523
AFIX  23
H1IA  2    0.301261    0.291227    0.861319   -31.00000   -1.20000
H1IB  2    0.218871    0.301925    0.850943   -31.00000   -1.20000
AFIX   0

PART 0
PART 11
O7B   5    0.283799    0.820639    0.524101    41.00000    0.08639    0.06007 =
         0.04638   -0.02072    0.02179   -0.00748
C110  1    0.298287    0.869581    0.601689    41.00000    0.10348    0.04614 =
         0.04218   -0.00639    0.02762    0.00877
AFIX  23
H11G  2    0.325893    0.858107    0.635041    41.00000   -1.20000
H11H  2    0.267873    0.894753    0.611057    41.00000   -1.20000
AFIX   0
C109  1    0.255138    0.832107    0.572296    41.00000    0.10293    0.05457 =
         0.06561   -0.01582    0.04298   -0.00161
AFIX  23
H10S  2    0.255369    0.805132    0.595857    41.00000   -1.20000
H10T  2    0.205826    0.842247    0.563336    41.00000   -1.20000
AFIX   0
C111  1    0.346305    0.884646    0.560718    41.00000    0.10169    0.07216 =
         0.04440   -0.01650    0.02687   -0.01255
AFIX  23
H11I  2    0.332589    0.914975    0.546139    41.00000   -1.20000
H11J  2    0.395954    0.885671    0.577293    41.00000   -1.20000
AFIX   0
C112  1    0.336841    0.851687    0.520021    41.00000    0.32075    0.24660 =
         0.13078   -0.14571    0.17386   -0.21413
AFIX  23
H11K  2    0.327065    0.867300    0.484821    41.00000   -1.20000
H11L  2    0.381596    0.834944    0.519892    41.00000   -1.20000
AFIX   0
PART 0
PART 12
O7A   5    0.232662    0.815379    0.504735   -41.00000    0.19361    0.07302 =
         0.04096    0.00011    0.01724    0.01459
C1J   1    0.185516    0.798311    0.539317   -41.00000    0.22173    0.13287 =
         0.04884    0.00110    0.03055   -0.00889
AFIX  23
H1JA  2    0.196313    0.766089    0.547581   -41.00000   -1.20000
H1JB  2    0.136699    0.800216    0.521101   -41.00000   -1.20000
AFIX   0
C1K   1    0.191872    0.824899    0.590180   -41.00000    0.25414    0.15437 =
         0.05007   -0.00717    0.03816   -0.02659
AFIX  23
H1KA  2    0.192521    0.804661    0.621839   -41.00000   -1.20000
H1KB  2    0.152259    0.846441    0.590106   -41.00000   -1.20000
AFIX   0
C1L   1    0.259875    0.849479    0.591187   -41.00000    0.22788    0.12417 =
         0.03452   -0.00672    0.03057    0.00396
AFIX  23
H1LA  2    0.297502    0.834139    0.615273   -41.00000   -1.20000
H1LB  2    0.255499    0.881088    0.603563   -41.00000   -1.20000
AFIX   0
C1M   1    0.275080    0.848139    0.533557   -41.00000    0.35300    0.24770 =
         0.04724   -0.06555    0.06877   -0.13940
AFIX  23
H1MA  2    0.265670    0.878225    0.516709   -41.00000   -1.20000
H1MB  2    0.325288    0.840762    0.532406   -41.00000   -1.20000
AFIX   0

PART 0
PART 6
O8A   5    0.486881    0.351518    0.730303   -51.00000    0.05101    0.16184 =
         0.07726    0.01836    0.01391    0.01960
C1N   1    0.544866    0.348950    0.698679   -51.00000    0.04474    0.17069 =
         0.06107    0.03445    0.00531    0.03970
AFIX  23
H1NA  2    0.535846    0.325487    0.670358   -51.00000   -1.20000
H1NB  2    0.588923    0.341268    0.721911   -51.00000   -1.20000
AFIX   0
C1O   1    0.521563    0.427054    0.714046   -51.00000    0.01462    0.16457 =
         0.06281    0.02233   -0.00765    0.02397
AFIX  23
H1OA  2    0.477527    0.442001    0.698262   -51.00000   -1.20000
H1OB  2    0.556276    0.450435    0.727754   -51.00000   -1.20000
AFIX   0
C1P   1    0.507927    0.393141    0.759056   -51.00000    0.01462    0.16457 =
         0.06281    0.02233   -0.00765    0.02397
AFIX  23
H1PA  2    0.551100    0.388373    0.784559   -51.00000   -1.20000
H1PB  2    0.470081    0.404241    0.779347   -51.00000   -1.20000
AFIX   0
C1Q   1    0.550753    0.395873    0.673112   -51.00000    0.01462    0.16457 =
         0.06281    0.02233   -0.00765    0.02397
AFIX  23
H1QA  2    0.600241    0.403391    0.669216   -51.00000   -1.20000
H1QB  2    0.522198    0.397684    0.637344   -51.00000   -1.20000
AFIX   0

PART 0
PART 13
O2AA  5    0.065074    0.371092    0.816691    61.00000    0.26791    0.08084 =
         0.12945   -0.01161    0.09739   -0.02666
C0EA  1    0.039080    0.333970    0.837001    61.00000    0.33114    0.08968 =
         0.11138   -0.02310    0.10820   -0.05150
AFIX  23
H0EA  2   -0.012937    0.334763    0.833725    61.00000   -1.20000
H0EB  2    0.058225    0.329390    0.875267    61.00000   -1.20000
AFIX   0
C3CA  1    0.048092    0.323291    0.745001    61.00000    0.19903    0.07133 =
         0.10302   -0.00031    0.07972    0.01085
AFIX  23
H3CA  2    0.084672    0.319892    0.720524    61.00000   -1.20000
H3CB  2    0.001959    0.314082    0.725837    61.00000   -1.20000
AFIX   0
PART 0
PART 14
O5AA  5    0.104305    0.351469    0.806179   -61.00000    0.12392    0.12536 =
         0.10241    0.04489    0.00412   -0.06134
C1CA  1    0.049354    0.346121    0.768827   -61.00000    0.19222    0.16568 =
         0.20335    0.09502   -0.08036   -0.10312
AFIX  23
H1CC  2    0.063948    0.351562    0.732700   -61.00000   -1.20000
H1CD  2    0.012685    0.368601    0.774636   -61.00000   -1.20000
AFIX   0
C2CA  1    0.033829    0.291112    0.833019   -61.00000    0.19939    0.15461 =
         0.17289    0.04267    0.01462   -0.11107
AFIX  23
H2CA  2    0.035880    0.259003    0.844514   -61.00000   -1.20000
H2CB  2    0.000413    0.308031    0.852765   -61.00000   -1.20000
AFIX   0
PART 0
PART 13
C7CA  1    0.066904    0.295654    0.798434    61.00000    0.31606    0.08093 =
         0.09437    0.00003    0.07430   -0.00563
AFIX  23
H7CA  2    0.117973    0.289795    0.806729    61.00000   -1.20000
H7CB  2    0.040271    0.266940    0.798712    61.00000   -1.20000
AFIX   0
PART 0
PART 14
C4CA  1    0.017765    0.296522    0.771047   -61.00000    0.10404    0.13571 =
         0.16780    0.01200    0.01802   -0.05523
AFIX  23
H4CA  2   -0.033235    0.295423    0.758334   -61.00000   -1.20000
H4CB  2    0.043177    0.274169    0.751112   -61.00000   -1.20000
AFIX   0
C6CA  1    0.108064    0.313756    0.837748   -61.00000    0.20143    0.19723 =
         0.23407    0.14306   -0.08473   -0.12804
AFIX  23
H6CA  2    0.123503    0.322081    0.875756   -61.00000   -1.20000
H6CB  2    0.142724    0.292260    0.825868   -61.00000   -1.20000
AFIX   0
PART 0
PART 13
C5CA  1    0.045949    0.371076    0.766571    61.00000    0.24613    0.07084 =
         0.13093   -0.01008    0.10022   -0.01703
AFIX  23
H5CA  2    0.077596    0.390725    0.748309    61.00000   -1.20000
H5CB  2   -0.002420    0.383255    0.759123    61.00000   -1.20000
AFIX   0
PART 0
PART 9
O4AA  5    0.262230    0.507686    0.829074   -71.00000    0.07193    0.06021 =
         0.10646   -0.02263    0.01971    0.01128
C2BA  1    0.323812    0.505018    0.870984   -71.00000    0.06810    0.05661 =
         0.11022   -0.02412    0.01922    0.00215
AFIX  23
H2BA  2    0.311160    0.490109    0.903965   -71.00000   -1.20000
H2BB  2    0.342649    0.535579    0.880516   -71.00000   -1.20000
AFIX   0
C8CA  1    0.360437    0.486269    0.783152   -71.00000    0.06526    0.05827 =
         0.11124   -0.02755    0.01676    0.00154
AFIX  23
H8CA  2    0.344594    0.458644    0.762708   -71.00000   -1.20000
H8CB  2    0.401201    0.499363    0.767789   -71.00000   -1.20000
AFIX   0
C3BA  1    0.378844    0.475923    0.844181   -71.00000    0.06526    0.05827 =
         0.11124   -0.02755    0.01676    0.00154
AFIX  23
H3BA  2    0.427569    0.485316    0.857277   -71.00000   -1.20000
H3BB  2    0.373426    0.443270    0.851661   -71.00000   -1.20000
AFIX   0
C1BA  1    0.299100    0.521638    0.782732   -71.00000    0.06810    0.05661 =
         0.11022   -0.02412    0.01922    0.00215
AFIX  23
H1BC  2    0.317791    0.552812    0.787730   -71.00000   -1.20000
H1BD  2    0.267160    0.520155    0.748465   -71.00000   -1.20000
AFIX   0
PART 0
PART 10
C9CA  1    0.346019    0.499323    0.807166    71.00000    0.23813    0.25357 =
         0.13776   -0.06923    0.09957   -0.15531
AFIX  23
H9CA  2    0.366760    0.529800    0.804249    71.00000   -1.20000
H9CB  2    0.330942    0.487290    0.770574    71.00000   -1.20000
AFIX   0
O3AA  5    0.288377    0.499990    0.839904    71.00000    0.18747    0.31328 =
         0.09055   -0.07672    0.04718   -0.16923
C1DA  1    0.398023    0.466519    0.840774    71.00000    0.37088    0.15277 =
         0.24759   -0.05909    0.20861   -0.04068
AFIX  23
H1DC  2    0.447258    0.472873    0.834912    71.00000   -1.20000
H1DD  2    0.386906    0.434541    0.831344    71.00000   -1.20000
AFIX   0
C0DA  1    0.321573    0.508572    0.893825    71.00000    0.15144    0.13569 =
         0.09706   -0.06044    0.01535   -0.02824
AFIX  23
H0DA  2    0.289351    0.501378    0.920745    71.00000   -1.20000
H0DB  2    0.336293    0.540638    0.898123    71.00000   -1.20000
AFIX   0
C2DA  1    0.385847    0.476860    0.900173    71.00000    0.24948    0.14397 =
         0.20065   -0.00081    0.12741    0.03986
AFIX  23
H2DA  2    0.375840    0.448765    0.919476    71.00000   -1.20000
H2DB  2    0.427335    0.492000    0.920006    71.00000   -1.20000
AFIX   0

PART 0
PART 16
C14B  1    0.421272    0.750013    0.612966   -81.00000    0.07498    0.13475 =
         0.06319   -0.01997    0.01510    0.06182
AFIX 137
H14D  2    0.465955    0.766543    0.617664   -81.00000   -1.50000
H14E  2    0.382164    0.771621    0.609724   -81.00000   -1.50000
H14F  2    0.418596    0.731495    0.580225   -81.00000   -1.50000
AFIX   0
C15B  1    0.401718    0.756517    0.702008   -81.00000    0.09406    0.13330 =
         0.06870   -0.02148    0.02816    0.05153
AFIX 137
H15D  2    0.443638    0.762087    0.727807   -81.00000   -1.50000
H15E  2    0.362366    0.748061    0.721577   -81.00000   -1.50000
H15F  2    0.389653    0.784050    0.680995   -81.00000   -1.50000
AFIX   0
C16B  1    0.349162    0.688429    0.649254   -81.00000    0.07498    0.13475 =
         0.06319   -0.01997    0.01510    0.06182
AFIX  33
H16D  2    0.359515    0.663973    0.624914   -81.00000   -1.50000
H16E  2    0.334581    0.675439    0.682230   -81.00000   -1.50000
H16F  2    0.311195    0.707344    0.631404   -81.00000   -1.50000
AFIX   0
PART 0
PART 18
C46B  1    1.141528    0.696289    0.728553   -91.00000    0.04914    0.07196 =
         0.04239   -0.00575    0.01256   -0.03606
AFIX 137
H46D  2    1.116933    0.723865    0.737443   -91.00000   -1.50000
H46E  2    1.191319    0.703150    0.727181   -91.00000   -1.50000
H46F  2    1.137298    0.673258    0.756212   -91.00000   -1.50000
AFIX   0
C45B  1    1.148172    0.631720    0.664133   -91.00000    0.07186    0.09305 =
         0.09228   -0.03403    0.02398   -0.03363
AFIX 137
H45D  2    1.153112    0.614784    0.698123   -91.00000   -1.50000
H45E  2    1.194884    0.638419    0.653974   -91.00000   -1.50000
H45F  2    1.121590    0.613558    0.635772   -91.00000   -1.50000
AFIX   0
C44B  1    1.120569    0.711336    0.627965   -91.00000    0.06690    0.13624 =
         0.04880    0.01299    0.03671   -0.01107
AFIX 137
H44D  2    1.108757    0.697321    0.592449   -91.00000   -1.50000
H44E  2    1.170232    0.720206    0.632626   -91.00000   -1.50000
H44F  2    1.091171    0.738195    0.630661   -91.00000   -1.50000
AFIX   0
HKLF 4


REM  cg4060p2_a.res in P2(1)/c
REM R1 =  0.0571 for   17084 Fo > 4sig(Fo)  and  0.0908 for all   24118 data
REM   1871 parameters refined using   1175 restraints

END

WGHT      0.0739     18.1487

REM Highest difference peak  0.892,  deepest hole -0.606,  1-sigma level  0.069
Q1    1   0.7515  0.5903  0.8149  11.00000  0.05    0.89
Q2    1   0.2090  0.3946  0.8259  11.00000  0.05    0.84
Q3    1   0.4622  0.8295  0.5803  11.00000  0.05    0.76
Q4    1   0.3118  0.3200  0.8528  11.00000  0.05    0.65
Q5    1   0.1563  0.4168  0.8106  11.00000  0.05    0.61
;
_shelx_res_checksum                13609
_shelx_hkl_file
;
   0   0  -4  274.78   15.66
   0   0  -5    3.57    2.23
   0   0  -6 1063.07   59.98
   0   0  -7    0.86    2.56
   0   0  -8 3647.70  188.39
   0   0   8 3214.37  188.16
   0   0   9   -2.34    2.16
   0   0  -9   -4.80    3.42
   0   0  10  543.02   31.16
   0   0 -10  563.23   31.55
   0   0  11    2.18    2.63
   0   0 -11   -4.98    4.36
   0   0 -12  409.14   23.85
   0   0  12  402.65   23.21
   0   0  13    0.08    3.54
   0   0 -13   -1.14    5.25
   0   0 -14  212.69   12.30
   0   0 -14  227.90   14.33
   0   0  14  233.92   13.12
   0   0 -15   -1.04    1.50
   0   0  15    0.59    4.05
   0   0  16  457.29   23.89
   0   0 -16  438.55   25.19
   0   0 -16  401.65   23.22
   0   0 -17   -0.48    1.62
   0   0  17    2.36    4.76
   0   0 -17   -0.28    8.25
   0   0  18    0.36    5.24
   0   0 -18   -5.29    8.61
   0   0 -18    6.71    1.68
   0   0  19    1.29    5.60
   0   0 -19    5.52   10.16
   0   0  20  328.78   20.03
   0   0 -20  335.27   22.64
   0   0 -21   -6.11   12.35
   0   0  21   -2.36    6.40
   0   0  22 1350.78   77.66
   0   0 -22 1423.61   79.61
   0   0 -23   10.80   14.95
   0   0  23    5.02    7.90
   0   0 -24   30.78   15.59
   0   0  24   20.13    8.38
   0   0  25   -8.24    8.83
   0   0 -25    8.11   17.13
   0   0 -26    3.17   18.75
   0   0  26   -4.31    9.38
   0   0  27    5.53   10.07
   0   0 -27   19.05   21.29
   0   0  28   74.84   11.56
   0   0 -28   72.21   22.94
   0   0  29   -8.47   11.05
   0   0 -29   17.64   22.32
   0  -1  -4 1836.28  107.22
   0  -1  -4 2175.98  107.45
   0  -1  -5  608.09   34.57
   0   1   6  349.43   20.18
   0  -1  -6  358.03   20.41
   0   1  -7    5.54    2.42
   0   1   7    4.74    1.96
   0   1   7    3.79    2.49
   0  -1  -7   -0.33    2.79
   0   1  -8   63.09    4.52
   0  -1  -8   61.48    5.39
   0   1   8   64.44    4.17
   0   1   9  923.44   50.97
   0   1  -9  892.79   51.16
   0  -1  -9  868.80   51.35
   0   1 -10  794.14   41.74
   0  -1 -10  758.93   41.98
   0   1  10  693.39   41.42
   0   1 -11  487.52   27.14
   0  -1  11  502.23   26.76
   0   1  11  491.28   26.74
   0  -1 -11  457.68   26.38
   0  -1 -11  500.73   27.52
   0  -1 -12  522.46   31.77
   0   1  12  552.58   30.99
   0  -1 -12  540.06   30.65
   0  -1  12  576.16   31.10
   0   1 -12  550.05   31.44
   0  -1 -13   59.93    3.57
   0  -1  13   56.88    4.83
   0   1  13   66.31    5.01
   0  -1 -13   64.48    7.19
   0   1 -13   51.80    6.17
   0  -1  14   33.74    4.31
   0  -1 -14   28.54    2.03
   0  -1 -14   28.02    6.95
   0   1  14   36.00    4.15
   0   1 -14   35.04    6.15
   0   1 -15    1.35    1.71
   0  -1 -15    3.37    1.16
   0   1  15    2.81    4.15
   0   1 -15   -7.89    6.37
   0  -1 -15   -4.51    7.11
   0  -1  15    1.31    4.34
   0   1  16   19.32    4.40
   0  -1  16   28.17    4.65
   0   1 -16   12.68    7.09
   0  -1 -16   19.20    1.65
   0  -1 -16   14.31    7.98
   0   1 -16   19.93    2.16
   0   1 -17   45.73    3.48
   0  -1  17   55.47    5.97
   0  -1 -17   64.32   10.00
   0   1  17   64.21    5.98
   0   1 -17   53.13    8.45
   0   1  18   50.98    6.26
   0   1 -18   29.26    8.61
   0   1 -18   41.38    3.14
   0  -1 -18   53.22   10.25
   0  -1  18   49.33    6.42
   0  -1  19   26.59    5.80
   0   1 -19   22.56    2.45
   0   1  19   23.64    6.04
   0   1 -19   22.75    9.88
   0  -1 -19   24.89   11.13
   0   1  20   52.89    6.69
   0   1 -20   44.87   10.51
   0  -1 -20   38.45   11.95
   0   1 -20   41.95    3.39
   0  -1  20   60.14    7.02
   0  -1 -21   62.55   14.71
   0   1  21   78.29    8.36
   0  -1  21   90.05    8.54
   0   1 -21   81.43   12.82
   0   1 -22   12.17   13.17
   0  -1  22   19.73    7.73
   0   1  22   33.86    7.64
   0   1 -23  168.05   17.31
   0  -1  23  163.70   12.01
   0   1  23  142.33   12.04
   0  -1 -23  164.81   19.17
   0   1  24  112.30   10.19
   0   1 -24   91.78   16.54
   0  -1  24   88.33   10.12
   0  -1 -24  100.15   17.67
   0   1  25   18.16    8.78
   0  -1 -25  -12.63   18.31
   0  -1  25   22.83    9.00
   0   1 -25   26.69   16.42
   0  -1 -26   27.42   20.54
   0   1 -26   35.06   18.59
   0   1  26   46.44    9.40
   0  -1  26   29.81    9.74
   0  -1 -27   75.06   20.82
   0  -1  27   89.01   11.21
   0   1 -27   67.94   19.67
   0   1  27   70.76   11.04
   0  -1 -28   13.59   22.12
   0   1 -28   -2.77   20.94
   0   1  28    8.92   10.32
   0  -1  28   29.50   10.90
   0  -1  29   14.90   11.20
   0  -1 -29  -18.42   23.02
   0   1 -29   26.47   21.71
   0   1  29   14.10   10.78
   0  -2  -3  562.68   32.11
   0  -2  -4  104.39    7.96
   0  -2  -4  122.39    6.92
   0  -2  -5 1852.26   94.11
   0  -2  -5 1628.48   93.63
   0  -2  -6   44.48    4.68
   0   2   6   47.16    3.07
   0  -2  -6   44.15    3.05
   0   2   7 1686.46   92.08
   0   2   7 1596.61   91.84
   0  -2  -7 1683.38   92.31
   0   2   8  587.98   34.60
   0   2   8  617.74   34.35
   0  -2  -8  604.95   35.03
   0  -2  -9   93.40    7.18
   0   2   9   92.90    6.36
   0   2   9   91.15    5.75
   0   2 -10  479.85   26.84
   0   2  10  459.64   26.59
   0   2  10  484.63   26.95
   0  -2 -10  440.94   27.37
   0   2  11  195.11   11.67
   0   2 -11  195.79   12.10
   0  -2 -11  205.85   13.03
   0   2 -12  261.37   15.05
   0  -2 -12  239.49   15.97
   0   2  12  243.21   14.56
   0  -2 -13   -6.96    6.48
   0   2 -13   -0.90    4.74
   0   2  13    4.09    3.28
   0  -2 -14   70.41    8.84
   0   2  14   73.14    5.76
   0   2 -14   77.05    7.20
   0  -2  14   84.26    5.98
   0   2 -15  200.61   13.30
   0   2  15  202.77   12.40
   0  -2 -15  228.64   14.91
   0  -2  15  198.45   12.37
   0  -2 -16  168.80   14.13
   0   2 -16  163.92   12.61
   0  -2  16  172.12   11.26
   0   2  16  185.22   11.16
   0   2 -17   -4.88    7.20
   0  -2  17   -3.30    4.85
   0  -2 -17    2.92    9.74
   0   2 -17    1.82    2.22
   0   2  17    4.66    4.69
   0  -2 -18   17.26   10.31
   0   2 -18   20.25    2.65
   0  -2  18   25.59    6.14
   0   2 -18   17.94    7.79
   0   2  18   27.07    5.37
   0  -2 -19  148.68   15.91
   0   2  19  190.49   11.72
   0  -2  19  186.42   11.76
   0   2 -19  164.78   10.00
   0   2 -19  183.26   13.72
   0  -2  20    6.58    6.57
   0  -2 -20   -2.82   12.85
   0   2 -20   -2.66    2.52
   0   2  20    8.06    6.30
   0   2 -20    1.23    9.67
   0  -2 -21  869.72   46.26
   0   2 -21  712.81   42.14
   0   2  21  785.68   42.98
   0   2 -21  804.06   44.54
   0  -2  21  833.09   43.00
   0   2 -22  236.68   18.78
   0  -2 -22  244.37   21.20
   0  -2  22  231.11   15.53
   0   2  22  248.95   15.27
   0   2 -22  226.27   13.30
   0   2 -23   97.15   15.15
   0   2  23  127.47   10.76
   0  -2 -23  139.07   18.86
   0  -2  23  118.98   10.59
   0  -2  24   25.32    9.08
   0   2 -24   30.25   14.48
   0  -2 -24   33.24   17.80
   0   2  24   32.94    7.93
   0   2  25    9.06    8.53
   0   2 -25   -5.36   15.76
   0  -2 -25   11.54   18.88
   0  -2  25    0.56    8.84
   0   2 -26   12.36   17.57
   0   2  26   34.93    9.20
   0  -2  26   32.21    9.65
   0  -2  27   71.04   11.05
   0   2 -27   86.42   19.49
   0  -2 -27   86.83   22.41
   0   2  27   53.57   10.58
   0   2  28   58.43   11.03
   0   2  28   53.48   13.28
   0  -2 -28   75.62   23.66
   0  -2  28   53.06   11.08
   0   2 -29  -22.19   21.55
   0  -2  29   17.29   11.28
   0   2  29   12.59   10.91
   0  -2 -29    0.84   24.31
   0   2  29   11.69   12.63
   0  -3  -3   62.07    3.90
   0  -3  -3   57.27    5.82
   0  -3  -3   65.98    3.77
   0  -3  -4 8746.09  495.75
   0  -3  -4 9389.29  496.30
   0  -3  -5 1212.35   64.22
   0  -3  -5 1148.82   63.43
   0   3   5 1093.02   63.44
   0  -3  -6   37.85    6.21
   0  -3  -6   50.81    3.17
   0   3   6   43.45    3.19
   0  -3  -7    9.93    4.92
   0  -3  -7    9.22    1.91
   0   3   7   11.42    1.84
   0   3   7   15.03    3.77
   0   3   8   97.25    6.80
   0  -3  -8   91.40    5.73
   0  -3  -8   96.36    8.18
   0   3   8   94.48    5.72
   0   3   9   -3.99    4.08
   0  -3  -9   -2.26    5.39
   0   3   9   -2.57    2.04
   0  -3 -10 4208.95  231.07
   0   3  10 4045.22  230.28
   0   3  10 4158.19  230.57
   0   3  11    3.82    4.31
   0  -3 -11    1.29    6.04
   0   3  11    0.75    3.02
   0   3  12  991.74   53.46
   0   3  12  905.26   53.04
   0  -3 -12  972.29   54.19
   0   3  13    6.36    3.56
   0   3 -13    1.62    4.49
   0  -3 -13    7.02    8.03
   0   3 -14  193.37   11.99
   0  -3 -14  170.07   13.86
   0   3  14  180.80   11.24
   0   3 -15    8.74    5.65
   0  -3 -15    1.77    9.06
   0   3  15    8.79    4.00
   0   3 -16  326.79   22.76
   0  -3  16  416.61   22.31
   0   3  16  377.40   22.06
   0  -3 -16  379.30   24.78
   0  -3  17    3.02    5.26
   0  -3 -17   -7.12   10.60
   0   3  17   -0.88    4.65
   0   3 -17   -1.68    6.86
   0   3 -18    0.81    2.58
   0  -3 -18   -4.49   12.29
   0   3  18    6.24    5.26
   0  -3  18    6.12    5.32
   0   3 -18    4.94    7.31
   0   3 -19    4.49    2.68
   0   3 -19    1.81    8.08
   0   3  19    3.15    5.96
   0  -3  19   -8.55    6.31
   0  -3  20  552.40   28.16
   0   3 -20  445.88   27.05
   0   3 -20  466.10   29.36
   0  -3 -20  552.09   32.32
   0   3  20  530.80   28.02
   0  -3 -21   28.39   15.95
   0  -3  21   38.93    7.29
   0   3  21   19.28    6.80
   0   3 -21   23.30    3.27
   0   3 -21   25.26   10.37
   0   3  22   20.26    7.37
   0   3 -22    8.01    2.90
   0   3 -22    4.79   11.24
   0  -3  22    1.43    7.41
   0   3 -23  153.18    9.53
   0   3 -23  161.51   16.12
   0  -3  23  174.28   12.06
   0  -3 -23  163.14   20.69
   0   3  23  170.52   12.08
   0   3 -24   23.02   13.20
   0  -3 -24   20.93   18.50
   0   3  24   28.83    8.21
   0  -3  24   12.16    8.51
   0   3 -25   -1.79   14.13
   0   3  25    1.42    8.44
   0  -3  25    3.16    8.71
   0  -3 -25   20.59   19.25
   0  -3 -26   54.84   21.01
   0   3  26   95.68   12.13
   0  -3  26   55.11   10.80
   0   3 -26   33.00   15.90
   0   3  26   72.78    9.92
   0   3  27   28.78   12.45
   0   3 -27   15.40   18.24
   0  -3 -27   -4.76   20.16
   0   3  27    2.91    9.67
   0  -3  27   -6.38   10.33
   0   3  28   14.43   12.31
   0  -3 -28   14.27   24.10
   0   3  28   14.64   12.70
   0   3 -28   25.82   19.23
   0  -3  28   -4.47   10.63
   0   3  28   29.07   10.63
   0  -3  29   -7.11   11.21
   0   3  29  -12.54   10.65
   0   3 -29  -25.34   20.09
   0  -3 -29   13.27   24.33
   0  -4   0 7819.98  439.24
   0  -4   1  521.15   30.34
   0  -4  -1  537.22   30.12
   0  -4  -2  824.39   46.83
   0  -4  -2  819.03   46.29
   0  -4  -3   38.25    2.33
   0  -4  -3   32.70    2.58
   0  -4  -3   28.72    5.99
   0  -4  -4  447.16   24.33
   0   4   4  403.47   24.24
   0  -4  -4  451.60   24.24
   0  -4  -5 4422.97  237.79
   0  -4  -5 4207.33  236.96
   0   4   5 4203.29  236.96
   0  -4  -6    5.29    6.21
   0  -4  -6   16.16    1.75
   0   4   6    8.68    1.58
   0   4   7   31.52    4.67
   0  -4  -7   31.98    6.99
   0   4   7   34.33    2.50
   0   4   7   24.49    2.89
   0  -4  -7   28.14    2.45
   0   4   8  129.55    8.02
   0   4   8  141.69    9.06
   0  -4  -8  139.07    8.03
   0   4   8  136.36    8.36
   0  -4  -8  156.80   10.94
   0  -4  -9  158.08   10.94
   0   4   9  139.97    8.49
   0   4   9  135.14    8.12
   0   4   9  133.10    9.33
   0  -4  -9  133.50    8.06
   0   4  10  121.27    6.93
   0   4  10  104.20    8.16
   0  -4 -10  100.36    6.81
   0  -4 -10  116.24    9.95
   0   4  11    1.80    2.81
   0   4  11    0.32    4.32
   0  -4 -11    7.47    7.27
   0   4  12   30.15    3.69
   0  -4 -12   41.47    8.87
   0   4  12   28.16    5.85
   0  -4 -13  733.28   42.64
   0   4  13  702.97   41.37
   0   4  13  725.02   40.84
   0  -4 -14   45.38    9.86
   0   4 -14   47.60    5.77
   0   4  14   30.56    6.32
   0   4  14   37.03    4.52
   0   4 -15  750.07   41.09
   0   4  15  693.01   40.69
   0  -4 -15  729.25   42.80
   0  -4 -16   46.73   11.32
   0   4  16   60.59    5.65
   0   4 -16   53.36    6.96
   0   4 -17   -1.18    6.76
   0  -4  17    7.35    5.43
   0   4  17    6.66    4.70
   0   4  18   70.14    6.82
   0  -4  18   61.80    7.08
   0   4 -18   50.39    8.16
   0  -4 -18   79.07   14.01
   0   4 -19   38.04    3.84
   0   4 -19   45.98    8.71
   0   4  19   40.86    6.42
   0  -4  19   55.31    6.89
   0  -4 -19   55.85   14.32
   0   4  20   69.29    7.60
   0  -4  20   75.96    7.90
   0   4 -20   49.42    9.76
   0  -4 -20   50.13   16.17
   0   4 -20   59.86    4.88
   0   4 -21  783.33   46.94
   0   4 -21  866.70   48.77
   0  -4  21  881.02   47.75
   0  -4 -21  967.24   51.87
   0   4  21  922.74   47.78
   0  -4 -22  194.84   21.52
   0  -4  22  192.70   13.29
   0   4  22  196.36   12.81
   0   4 -22  174.65   10.80
   0   4 -22  181.92   15.79
   0   4  23    7.71    9.08
   0  -4 -23   14.77   17.90
   0   4 -23   -4.21    3.32
   0  -4  23   22.07    8.37
   0   4 -23   10.80   11.41
   0   4  23   -1.11    7.37
   0   4 -24   17.56   12.82
   0  -4  24   -6.94    8.04
   0   4  24   11.51    8.10
   0   4 -24    4.89    3.45
   0  -4 -24   24.23   19.44
   0   4  24    0.23    9.39
   0   4 -25   14.26    3.52
   0   4 -25   13.76   13.95
   0  -4 -25    4.48   20.02
   0   4  25   -2.66   11.18
   0   4  25   26.09    8.79
   0  -4  25   18.13    9.27
   0  -4  26    3.35    9.23
   0   4 -26    1.38   15.22
   0  -4 -26   11.09   21.55
   0   4  26   -1.09    9.04
   0   4  26  -11.37   11.21
   0  -4 -27   25.12   23.36
   0  -4  27   53.14   11.11
   0   4 -27   34.26   16.54
   0   4  27   64.16   10.16
   0   4  27   41.55   11.96
   0  -4  28   54.59   11.04
   0  -4 -28   39.75   24.64
   0   4  28   30.81   10.30
   0   4 -28   12.68   17.76
   0   4  28   61.53   13.12
   0   4  28   51.87   12.68
   0  -4 -29  -23.19   25.35
   0  -4  29  -12.82   11.55
   0   4 -29   19.61   19.86
   0   4  29   16.85   10.65
   0  -5   0   -2.90    2.98
   0  -5   0    1.58    0.81
   0  -5  -1  105.99    6.13
   0  -5   1   95.11    5.35
   0   5   1   83.11    7.74
   0  -5   1   92.77    6.97
   0  -5  -1   89.44    5.38
   0  -5  -2   19.23    2.90
   0  -5  -2   28.14    5.48
   0   5   2   23.21    5.39
   0  -5  -2   17.38    1.75
   0  -5  -3 1310.09   72.30
   0  -5  -3 1143.74   73.16
   0  -5  -4  729.04   41.18
   0  -5  -4  719.56   41.25
   0  -5  -4  838.24   42.71
   0  -5  -5 2010.82  122.75
   0  -5  -5 2272.34  121.76
   0   5   5 2211.96  121.70
   0  -5  -5 2071.47  121.68
   0  -5  -6  101.24   10.13
   0   5   6  115.87    6.20
   0   5   6  110.25    6.47
   0   5   6   80.57    6.68
   0  -5  -6   96.59    6.46
   0   5   7   82.35    5.16
   0  -5  -7   90.73    5.22
   0  -5  -7   60.68    9.16
   0   5   7   83.10    5.66
   0   5   8   77.72    5.15
   0  -5  -8   63.72    8.43
   0   5   8   74.38    4.71
   0  -5  -8   72.24    4.75
   0   5   8   81.97    7.14
   0   5   9  292.51   18.10
   0   5   9  294.14   17.36
   0  -5  -9  296.13   19.80
   0   5   9  287.76   17.20
   0  -5  -9  316.05   17.15
   0   5  10   70.49    4.64
   0  -5 -10   59.06    4.72
   0   5  10   68.00    5.23
   0  -5 -10   81.74    9.74
   0   5  10   80.89    6.93
   0   5  11  411.68   23.10
   0   5  11  386.27   23.97
   0  -5 -11  397.18   23.04
   0   5  11  417.85   23.32
   0  -5 -11  380.40   25.51
   0  -5 -12  502.41   29.94
   0   5  12  480.54   27.69
   0   5  12  483.22   27.44
   0   5  12  465.76   28.21
   0  -5 -13   -3.68    9.13
   0   5  13    6.15    4.46
   0   5  13    6.54    3.30
   0   5  13    0.18    5.91
   0   5  14   41.89    6.52
   0   5  14   31.39    5.29
   0  -5 -14   27.77   10.90
   0   5  14   34.19    4.25
   0  -5 -15  132.38   13.65
   0   5  15  109.15    8.13
   0   5  15  106.75    9.71
   0   5  15  135.99    8.80
   0   5  16   95.53    8.30
   0   5 -16   93.21    8.54
   0  -5 -16   99.76   13.77
   0   5  16  115.22    7.69
   0   5 -17   96.68    9.39
   0  -5 -17   91.75   14.29
   0   5  17  114.72    8.03
   0   5  17  104.23    8.92
   0   5 -18  516.39   31.19
   0  -5 -18  539.77   34.49
   0   5  18  552.77   31.04
   0   5  18  518.10   30.51
   0   5  19   -2.40    5.66
   0  -5 -19    9.20   15.07
   0   5  19   -8.15    7.09
   0   5 -19   -1.10    3.32
   0  -5  19   -3.15    6.47
   0   5 -19   10.92    7.78
   0   5 -20  118.03   11.08
   0  -5  20  119.81    9.37
   0   5 -20   94.42    6.99
   0  -5 -20   89.67   17.28
   0   5  20  115.64    9.21
   0   5  20  134.03   10.62
   0  -5 -21   35.17   16.57
   0   5 -21   14.65    9.53
   0   5 -21   13.47    3.66
   0   5  21   10.59    6.55
   0  -5  21   20.13    7.47
   0   5  21   10.25    8.54
   0  -5 -22    7.41   17.81
   0   5  22   -9.65    7.06
   0   5 -22    0.54    3.53
   0  -5  22    8.28    7.02
   0   5  22    8.51    8.93
   0   5 -22  -10.15   10.77
   0  -5 -23   -1.43   19.40
   0   5  23    6.70    7.48
   0   5  23   12.02    9.06
   0   5 -23   10.04   11.56
   0  -5  23    9.08    7.98
   0   5 -23    9.78    3.71
   0  -5 -24   30.11   20.14
   0  -5  24   23.31    8.92
   0   5  24   27.07    8.06
   0   5 -24    8.53   12.24
   0   5 -24   16.94    4.00
   0   5  24   39.46   10.08
   0   5  25   42.10   11.00
   0   5  25   56.35    9.39
   0   5 -25   54.64   13.51
   0  -5  25   52.75    9.62
   0   5 -25   50.11    4.82
   0  -5 -25   53.44   20.93
   0   5  26   31.48   11.56
   0   5 -26   39.63    4.40
   0  -5 -26   34.60   22.34
   0   5 -26   22.31   15.58
   0   5  26   36.95    9.14
   0  -5  26   31.76   10.04
   0   5  27   98.06   11.59
   0  -5  27  103.50   12.24
   0   5  27   98.45   13.37
   0   5 -27   83.41   17.25
   0  -5 -27   89.87   25.26
   0   5  27  118.74   13.78
   0   5  28   36.34   12.24
   0   5 -28    6.19   16.50
   0   5  28   13.13   13.88
   0  -5 -28   35.16   24.95
   0  -5  28    1.98   10.58
   0   5  28   28.92   10.11
   0  -6   0 2190.62  118.73
   0   6   0 2064.52  118.73
   0  -6   0 1946.97  119.16
   0  -6  -1  632.19   33.03
   0  -6   1  613.20   33.79
   0  -6   1  597.33   33.01
   0  -6  -1  625.05   33.45
   0   6   1  631.29   34.40
   0   6   1  518.92   33.02
   0  -6  -2   98.48    5.77
   0   6   2  120.18    9.01
   0  -6  -3   90.65    9.81
   0  -6  -3  102.01    6.49
   0  -6  -4   21.69    7.62
   0  -6  -4   44.50    3.19
   0  -6  -5   66.44    9.83
   0  -6  -5   83.88    5.62
   0  -6  -5   94.18    5.39
   0  -6  -6 1626.98   92.32
   0   6   6 1668.77   92.43
   0  -6  -6 1533.74   93.59
   0  -6  -6 1658.25   92.41
   0   6   7  987.01   53.15
   0  -6  -7  883.83   53.29
   0   6   7  892.37   53.29
   0  -6  -7  903.83   54.86
   0   6   7  916.58   53.41
   0  -6  -8 1681.52   91.64
   0  -6  -8 1606.16   90.14
   0   6   8 1565.52   90.15
   0   6   8 1613.71   89.98
   0   6   8 1557.52   90.94
   0   6   8 1561.67   90.27
   0  -6  -9  172.26   13.32
   0  -6  -9  168.04   10.16
   0   6   9  194.26   10.22
   0   6   9  153.18   10.53
   0   6   9  154.65   11.89
   0   6  10    3.78    6.10
   0   6  10    7.02    3.41
   0   6  10    0.65    2.59
   0  -6 -10    3.89    2.37
   0  -6 -11    4.00    2.78
   0   6  11    5.61    5.67
   0   6  11    2.54    3.74
   0  -6 -11   -1.21    8.73
   0   6  11    3.39    2.88
   0  -6 -12  796.28   50.81
   0   6  12  886.62   49.51
   0   6  12  875.99   48.85
   0  -6 -12  795.40   48.63
   0   6  12  926.81   48.69
   0   6  13   89.59    6.81
   0  -6 -13   93.47   11.39
   0   6  13   81.14    8.32
   0   6  13   77.75    5.92
   0   6  14  212.14   13.46
   0   6  14  213.68   12.58
   0   6  14  179.53   11.88
   0  -6 -14  202.60   16.94
   0   6  15    7.13    5.41
   0   6  15    7.61    4.02
   0   6  15    1.46    7.02
   0  -6 -15   -3.50   11.67
   0   6  16   10.27    5.87
   0   6  16   18.14    7.16
   0  -6 -16    1.58   12.32
   0   6  16    8.54    4.04
   0   6 -17   36.96    6.60
   0   6  17   47.87    6.60
   0   6  17   26.50    7.70
   0   6  17   27.85    5.31
   0   6 -18    0.57    6.85
   0   6  18    6.80    5.26
   0  -6 -18    8.20   14.65
   0   6  18   -7.98    6.36
   0   6 -19    7.90    7.78
   0   6  19    7.76    7.32
   0   6  19   10.59    5.78
   0  -6 -19   -7.45   15.44
   0   6  20  152.89   10.81
   0  -6  20  160.48   11.30
   0   6 -20  143.96    9.39
   0   6  20  164.53   12.10
   0   6 -20  154.73   12.86
   0  -6 -20  129.76   19.06
   0   6  21   -7.57    6.56
   0  -6  21   -0.48    7.55
   0   6 -21    3.98    3.82
   0   6  21    6.89    8.33
   0  -6 -21   18.49   18.25
   0   6 -21   -6.33    8.95
   0   6 -22   68.18   10.76
   0   6  22   87.17    9.67
   0  -6 -22   67.82   19.41
   0   6  22   65.23    8.07
   0  -6  22   79.84    9.24
   0   6 -22   55.58    5.48
   0   6  23   74.60   10.45
   0   6 -23   49.39    5.16
   0  -6 -23   83.53   20.59
   0   6  23   69.55    8.40
   0  -6  23   67.94    9.49
   0   6 -23   68.32   11.29
   0   6  24    9.02    7.84
   0  -6 -24    4.82   21.47
   0   6 -24    8.27    3.93
   0  -6  24   12.49    9.05
   0   6  24   -0.69    9.97
   0   6 -24    5.37   11.79
   0   6 -25    5.75    4.04
   0   6  25   -2.41    8.87
   0   6  25   13.37   10.64
   0   6  25    2.88   10.41
   0  -6 -25   -2.55   21.89
   0  -6  25    8.93    9.03
   0   6 -25   21.73   12.82
   0   6 -26   79.49   14.69
   0  -6 -26   54.90   23.98
   0  -6  26   66.67   10.80
   0   6 -26   51.74    5.65
   0   6  26   73.59    9.68
   0   6  26   94.49   12.59
   0   6  26   86.85   11.76
   0  -6 -27   -0.93   23.06
   0   6  27   -5.29   13.06
   0   6 -27    9.74    4.38
   0   6  27    8.50    9.27
   0  -6  27   11.16   10.74
   0   6 -27   -4.41   15.28
   0   6  27   10.56   11.98
   0   6  28  115.89   12.00
   0  -6  28  125.37   13.38
   0   6 -28   66.43   18.05
   0   6  28  116.38   14.30
   0   6  28  106.46   13.93
   0  -6 -28   91.95   27.04
   0  -7   0   -1.39    4.84
   0  -7   0    1.15    1.23
   0   7   0    3.15    1.30
   0  -7   1  196.27   13.79
   0   7   1  211.36   14.69
   0  -7   1  227.76   12.18
   0   7   1  180.41   12.21
   0  -7  -1  211.77   13.16
   0  -7  -1  234.09   12.22
   0  -7  -2 1334.44   67.35
   0   7   2 1227.55   68.25
   0   7   2 1090.04   66.97
   0  -7  -2 1240.90   66.99
   0  -7   2 1318.20   67.84
   0  -7  -3  915.20   59.18
   0   7   3  867.09   59.16
   0  -7  -4  171.74   10.25
   0  -7  -4  147.70   13.64
   0  -7  -4  187.81   10.70
   0  -7  -5 2314.17  132.55
   0  -7  -5 2212.69  131.29
   0  -7  -5 2421.40  131.21
   0  -7  -6  207.51   12.09
   0  -7  -6  207.06   11.96
   0  -7  -6  212.09   15.27
   0   7   7   40.90    3.78
   0  -7  -7   39.42    3.13
   0  -7  -7   48.40    3.70
   0  -7  -7   25.07    9.09
   0   7   8  545.54   30.45
   0  -7  -8  484.61   33.01
   0   7   8  536.88   30.84
   0  -7  -8  553.83   30.63
   0   7   8  530.60   30.67
   0   7   8  465.66   32.10
   0  -7  -9  499.32   32.99
   0  -7  -9  511.42   30.52
   0   7   9  514.52   31.84
   0   7   9  544.72   30.28
   0   7   9  535.31   30.54
   0   7   9  552.80   30.77
   0  -7 -10  126.03    7.60
   0   7  10  133.59   10.31
   0  -7 -10  134.02   13.20
   0   7  10  121.54    8.04
   0   7  10  119.43    7.61
   0   7  11 1005.33   55.35
   0   7  11 1037.98   55.56
   0  -7 -11  920.85   55.30
   0   7  11  996.54   56.32
   0  -7 -11 1007.00   57.66
   0   7  12  685.46   38.55
   0   7  12  760.61   39.66
   0  -7 -12  647.36   38.48
   0   7  12  686.50   38.77
   0  -7 -12  719.18   41.23
   0   7  13   60.54    5.22
   0  -7 -13   60.95   12.56
   0   7  13   63.14    5.88
   0   7  13   58.92    7.54
   0  -7 -13   66.87    5.01
   0   7  14   40.71    4.55
   0  -7 -14   41.62    4.18
   0   7  14   46.68    5.52
   0   7  14   45.18    7.36
   0  -7 -14   46.88   11.87
   0  -7 -15   35.12   12.64
   0   7  15   33.71    5.75
   0   7  15   28.22    4.50
   0   7  15   35.94    7.66
   0  -7 -16   50.19   14.17
   0   7  16   50.28    5.53
   0   7  16   45.09    6.87
   0   7  16   48.68    8.34
   0   7  17  912.88   50.49
   0   7  17  875.04   49.92
   0  -7 -17  922.32   53.13
   0   7  17  846.32   49.57
   0  -7 -18   15.21   15.32
   0   7  18   19.63    8.38
   0   7  18    5.18    6.81
   0   7  18    5.54    5.42
   0   7  19    1.42    7.25
   0   7 -19   -3.97    7.44
   0   7  19   -1.75    5.60
   0  -7 -19    8.03   16.49
   0  -7 -20   69.13   18.14
   0   7  20   82.99    9.24
   0   7  20   71.74    7.71
   0   7 -20   78.27    9.64
   0   7 -21   -3.16    3.87
   0   7  21    8.70    7.82
   0  -7  21    2.33    7.87
   0   7  21   -8.55    6.85
   0  -7 -21  -18.38   18.63
   0   7 -21   14.66    8.80
   0  -7 -22   14.67   20.12
   0   7  22   27.54    9.50
   0  -7  22   25.67    8.59
   0   7 -22   26.53    4.45
   0   7 -22   32.73    9.99
   0   7  22   34.77    7.39
   0  -7 -23  -14.68   20.90
   0   7 -23    4.88   10.96
   0   7  23    5.61    7.34
   0   7  23    1.32    8.80
   0  -7  23    6.67    8.71
   0   7 -23    4.94    4.37
   0   7  24    8.12    9.52
   0   7  24   24.20    8.16
   0   7 -24   11.31   12.02
   0  -7 -24   34.98   21.23
   0  -7  24   22.54    9.41
   0   7  24    5.08   10.32
   0   7 -24   10.18    4.48
   0  -7  25   73.27   10.33
   0   7  25   76.40   11.65
   0  -7 -25   83.75   23.20
   0   7 -25   63.87   13.35
   0   7  25   91.98    9.53
   0   7  25   95.69   12.31
   0   7 -25   58.54    5.85
   0   7 -26   37.75   13.88
   0  -7 -26   53.04   25.04
   0   7  26   87.39   12.47
   0  -7  26   54.92   10.22
   0   7 -26   49.13    5.52
   0   7  26   58.47   12.17
   0   7  26   80.60    9.67
   0  -7 -27   46.95   26.83
   0   7 -27   66.46    6.47
   0   7 -27   78.93   15.26
   0   7  27   83.44   10.04
   0  -7  27   71.39   11.53
   0   7  27   98.15   12.65
   0   7  27  105.05   13.02
   0  -7  28   13.16   11.53
   0   7  28   19.70   12.94
   0   7  28    0.39    9.30
   0  -7 -28   32.55   27.15
   0   7 -28   -4.98   16.10
   0   8   0    4.85    1.46
   0  -8   0   -2.40    5.39
   0  -8   0    5.95    1.28
   0  -8   1 1067.92   61.91
   0  -8  -1 1077.14   62.44
   0   8   1 1144.93   61.94
   0   8   1 1035.79   63.27
   0  -8   1 1115.74   62.73
   0  -8  -1 1107.00   61.92
   0  -8  -2  140.27    9.46
   0  -8   2  156.91    8.32
   0   8   2  129.37    8.39
   0  -8  -2  143.77    8.41
   0   8   2  177.61   12.41
   0  -8   2  149.31   10.31
   0   8   2  138.15    9.02
   0   8   3    2.43    1.72
   0  -8  -3    2.69    3.57
   0   8   3   -3.03    8.64
   0  -8  -3   -4.92    8.22
   0  -8  -4   14.78    7.94
   0   8   4    8.00    2.04
   0  -8  -4    6.05    3.56
   0  -8  -5 1986.28  126.61
   0  -8  -5 2227.27  125.39
   0  -8  -5 2309.98  125.59
   0  -8  -6    6.35    8.74
   0  -8  -6    0.37    2.37
   0  -8  -6    2.65    1.95
   0  -8  -7  306.39   18.03
   0  -8  -7  305.88   21.33
   0  -8  -7  331.04   18.19
   0  -8  -8  912.05   52.50
   0  -8  -8  876.82   52.37
   0   8   8  890.30   52.56
   0   8   8  962.93   52.22
   0  -8  -8  904.34   54.61
   0   8   9  150.42    8.68
   0  -8  -9  157.13    9.09
   0   8   9  154.71    9.59
   0   8   9  145.85   11.97
   0  -8  -9  170.60   14.51
   0  -8 -10   -1.33    2.75
   0   8  10   10.46    7.58
   0   8  10    5.35    2.56
   0  -8 -10   -0.49   10.88
   0   8  10   -0.85    3.93
   0   8  10    5.72    1.05
   0   8  11   18.72    3.52
   0   8  11   34.34    4.45
   0  -8 -11   16.85   11.26
   0   8  11   34.17    7.35
   0  -8 -11   21.49    3.29
   0  -8 -12   25.39    3.45
   0   8  12   37.79    7.56
   0   8  12   23.98    3.81
   0  -8 -12   20.63   12.28
   0   8  12   25.36    4.66
   0   8  13   10.53    4.64
   0  -8 -13    2.85    3.10
   0   8  13    3.66    7.14
   0   8  13    8.61    3.65
   0  -8 -13   21.52   11.96
   0   8  14   98.80    9.96
   0   8  14   82.56    7.00
   0  -8 -14   97.30   14.90
   0  -8 -14  110.41    6.87
   0   8  14  107.46    7.68
   0   8  15  704.63   41.19
   0   8  15  748.39   42.02
   0  -8 -15  710.19   44.43
   0   8  15  717.12   40.88
   0  -8 -16  325.35   25.49
   0   8  16  337.40   19.66
   0   8  16  333.98   21.36
   0   8  16  327.24   20.23
   0   8  17  156.90   12.18
   0   8  17  182.34   13.54
   0   8  17  179.37   11.39
   0   8  18   68.52    8.12
   0  -8 -18   59.75   16.86
   0   8  18   77.48   10.09
   0   8  18   72.86    6.97
   0   8  19   16.36    9.33
   0   8  19   21.21    5.62
   0   8  19    7.74    7.19
   0  -8 -19   -0.72   15.71
   0   8  20   55.89    8.57
   0   8  20   50.77    6.99
   0  -8 -20   27.10   18.41
   0   8 -20   47.02    8.44
   0   8 -21  121.10    8.31
   0   8  21  110.61   11.16
   0   8 -21  124.81   11.34
   0   8  21  127.78    9.86
   0  -8 -21  135.48   21.02
   0  -8  22  147.06   11.69
   0   8  22  131.32   11.70
   0   8 -22  120.01   12.74
   0   8  22  166.92   12.32
   0   8 -22  118.25    8.78
   0   8  22  136.65   10.48
   0   8  23  100.03   11.04
   0   8 -23   87.42   11.45
   0   8  23   90.57   11.02
   0  -8 -23   81.65   22.31
   0   8  23   75.05    9.03
   0   8 -23   77.07    6.71
   0  -8  23   82.72   10.42
   0   8  24   66.93   10.62
   0  -8  24   67.51   10.37
   0   8  24  104.56   11.91
   0   8 -24   86.61   12.40
   0   8  24   71.55    9.04
   0  -8 -24   57.49   23.44
   0   8 -24   56.87    6.16
   0   8  25    5.90    8.34
   0  -8  25   -8.07    9.97
   0   8 -25  -13.99   11.71
   0   8  25    6.35   10.49
   0   8  25    4.08   11.07
   0  -8 -25   28.17   23.99
   0   8 -25   -2.69    4.77
   0   8  26   41.32   11.52
   0  -8 -26   23.46   24.97
   0   8  26   18.28    8.75
   0  -8  26   11.62   10.31
   0   8 -26   13.29   12.65
   0   8  26    9.51   11.61
   0   8 -26   12.17    4.97
   0   8  27  109.54   12.19
   0   8 -27   67.86    6.73
   0   8  27   91.73   13.09
   0  -8  27   62.64   11.85
   0  -8 -27   54.73   27.61
   0   8 -27  100.34   15.66
   0   8  27   55.63   10.38
   0   8  28   27.98    9.89
   0  -8 -28   51.55   28.57
   0   8  28   60.91   13.62
   0  -8  28   62.43   11.68
   0   8 -28   28.76   16.17
   0  -9   0   -0.18    4.53
   0   9   0   -1.93    1.50
   0  -9   0   -2.98    1.35
   0   9   1   71.64    6.32
   0   9   1   94.56    5.15
   0  -9  -1   80.64    7.24
   0  -9  -1   75.79    5.13
   0  -9   1   87.25    5.08
   0   9   1   75.20    9.07
   0  -9   1   99.22    7.70
   0   9   2    6.56    1.69
   0  -9   2    9.94    6.48
   0   9   2   12.84    4.06
   0   9   2   14.75    8.31
   0  -9  -2    9.90    1.68
   0  -9  -2    6.81    4.12
   0  -9   2   12.95    1.44
   0   9   3  671.75   34.77
   0  -9  -3  603.75   34.86
   0   9   3  585.02   34.31
   0   9   3  652.03   36.56
   0   9   4  733.99   40.64
   0  -9  -4  724.09   42.63
   0  -9  -4  696.69   41.25
   0   9   4  687.71   40.80
   0  -9  -5  288.08   17.58
   0  -9  -5  257.29   14.26
   0  -9  -5  243.20   14.82
   0   9   5  232.91   14.08
   0   9   6    3.06    2.59
   0  -9  -6    5.86    2.14
   0  -9  -6    4.88    2.64
   0  -9  -6   -0.42    9.79
   0  -9  -7   70.72    4.84
   0  -9  -7   61.99   11.53
   0  -9  -7   59.26    4.41
   0  -9  -8  107.02    6.62
   0  -9  -8  104.34   12.66
   0  -9  -8  102.90    6.95
   0   9   9   43.50    9.22
   0   9   9   55.34    4.93
   0  -9  -9   63.75   10.94
   0  -9  -9   60.42    4.85
   0   9   9   53.55    3.46
   0  -9  -9   57.34    4.30
   0  -9 -10 1275.23   79.27
   0   9  10 1448.17   79.08
   0   9  10 1411.52   79.50
   0   9  10 1489.08   80.59
   0  -9 -10 1286.69   81.53
   0   9  11  175.78   10.35
   0  -9 -11  153.90   10.23
   0  -9 -11  156.73   16.33
   0   9  11  180.34   10.94
   0   9  12  112.23   10.93
   0   9  12  128.05    8.08
   0   9  12  127.70    8.66
   0  -9 -12  121.67    7.94
   0  -9 -12  117.61   14.51
   0   9  13   50.01    5.67
   0  -9 -13   39.56   14.01
   0   9  13   60.45    9.02
   0  -9 -13   50.14    4.45
   0   9  13   45.36    4.69
   0   9  14    4.83    8.33
   0   9  14   10.73    5.28
   0   9  14   11.00    3.91
   0  -9 -14   11.05    3.56
   0  -9 -14   23.77   14.30
   0   9  15   23.57    5.79
   0  -9 -15   14.35   14.49
   0   9  15   23.37    4.29
   0   9  15   25.95    8.31
   0  -9 -15   19.48    4.05
   0  -9 -16  743.95   50.60
   0   9  16  843.76   47.96
   0   9  16  858.84   47.13
   0   9  16  802.28   46.71
   0   9  17   24.52    5.26
   0  -9 -17   38.81   17.03
   0   9  17   47.39    7.35
   0   9  17   32.01    8.99
   0   9  18   56.28    9.92
   0  -9 -18   33.84   17.56
   0   9  18   33.40    7.48
   0   9  18   37.69    5.90
   0   9  19    7.47    5.85
   0   9  19   15.78    7.38
   0   9  19    4.23    7.39
   0   9  19   -6.25    9.36
   0  -9 -19  -12.26   17.95
   0   9  20   13.37    6.22
   0   9  20   14.02   10.30
   0   9  20   19.52    7.91
   0   9  20   16.97    7.67
   0  -9 -20   24.95   19.42
   0  -9 -21    9.20   20.70
   0   9 -21   -0.66    8.70
   0   9  21    0.53    8.23
   0   9  21   11.56    6.67
   0   9  21   17.28    8.85
   0  -9 -22   15.68   20.96
   0   9 -22   11.27    4.79
   0   9 -22   11.93    9.15
   0   9  22   18.51    8.86
   0   9  22   20.91    7.16
   0   9  22   13.84    8.92
   0   9  23  158.67   13.61
   0   9  23  137.79   12.39
   0  -9 -23  120.51   24.11
   0   9 -23  126.86   12.95
   0  -9  23  144.75   11.80
   0   9  23  123.22   10.73
   0   9 -23  116.33    8.93
   0  -9 -24    6.60   23.48
   0   9  24   12.40    9.78
   0   9 -24    3.84    4.92
   0   9 -24   18.20   11.03
   0   9  24   21.23    8.17
   0  -9  24   11.07    9.67
   0   9  24    9.55   10.43
   0   9  25   -5.75   10.48
   0   9 -25    6.58    5.37
   0   9  25    4.61    7.96
   0   9  25   -0.20   10.15
   0   9 -25    1.86   11.72
   0  -9  25  -16.79    9.91
   0  -9 -25   -0.98   24.44
   0   9  26   75.39   12.62
   0   9 -26   64.82    6.69
   0   9 -26   75.00   13.91
   0   9  26   88.12    9.81
   0  -9  26   65.13   11.33
   0  -9 -26   44.58   24.99
   0   9  26   78.98   11.93
   0  -9 -27   24.13   27.86
   0   9  27  -11.17    8.91
   0   9  27    9.64   12.25
   0   9 -27   -0.38    5.41
   0   9  27    4.84   11.56
   0   9 -27   -4.07   13.96
   0  -9  27    3.13   11.33
   0  -9 -28    8.68   28.46
   0   9 -28    0.80   15.25
   0   9  28   22.99   12.67
   0  -9  28   -8.11   11.69
   0   9  28   -7.55    9.62
   0 -10   0  471.65   27.92
   0  10   0  495.79   28.70
   0  10   0  508.96   27.96
   0 -10   0  581.62   29.12
   0 -10   1  145.46    8.72
   0  10   1  157.99    8.77
   0  10   1  163.10    9.88
   0  10  -1  133.67   10.29
   0 -10  -1  145.91    8.76
   0 -10   1  149.17   11.14
   0 -10  -1  176.19   10.43
   0  10   1  160.66   12.39
   0  10   2  589.31   33.48
   0 -10  -2  577.76   31.86
   0  10   2  535.86   31.68
   0 -10   2  584.77   31.12
   0  10   2  508.53   31.17
   0 -10  -2  549.83   31.17
   0 -10   2  524.10   32.58
   0  10   3   25.21    4.67
   0  10   3   26.82    9.50
   0 -10  -3   40.37    5.36
   0  10   3   39.32    3.02
   0 -10  -4  949.93   52.26
   0 -10  -4  930.91   53.65
   0  10   4  923.12   51.76
   0  10   5    4.55    2.54
   0 -10  -5    3.66    4.08
   0  10   6    3.28    2.59
   0 -10  -6    2.57    3.27
   0 -10  -6    2.38    2.29
   0 -10  -6    9.93    4.02
   0 -10  -7 2134.02  114.36
   0 -10  -7 2017.03  114.20
   0 -10  -7 1888.31  116.15
   0  10   7 1991.03  114.23
   0  10   8   16.20    3.46
   0 -10  -8   10.61    3.31
   0 -10  -8   15.42    2.82
   0 -10  -8   14.23   11.27
   0  10   9   12.27    1.84
   0 -10  -9    8.46    3.62
   0 -10  -9   11.03    2.90
   0  10   9   13.02    8.48
   0 -10 -10   10.10    3.15
   0  10  10   16.92    8.60
   0 -10 -10    7.86   11.30
   0  10  10   17.20    1.75
   0  10  11   17.53    8.83
   0  10  11    7.58    4.40
   0  10  11   12.48    1.59
   0 -10 -11    8.94    3.21
   0 -10 -12   65.19    5.26
   0  10  12   73.67    6.43
   0 -10 -12   73.47   14.20
   0  10  12   73.43   10.07
   0  10  13    0.69    4.90
   0  10  13    6.39    3.70
   0  10  13    4.81    8.75
   0 -10 -13   -1.22    3.57
   0 -10 -13    4.48   13.71
   0  10  14    9.64    3.99
   0 -10 -14   -6.64   13.32
   0 -10 -14   13.86    3.78
   0  10  14    9.29    5.75
   0  10  14   11.86    9.10
   0 -10 -15  831.29   49.18
   0 -10 -15  792.55   52.92
   0  10  15  874.29   50.65
   0  10  15  911.30   49.72
   0  10  15  896.73   49.30
   0 -10 -16  191.20   12.34
   0 -10 -16  163.62   20.45
   0  10  16  223.90   15.28
   0  10  16  195.92   12.60
   0  10  16  221.54   13.63
   0 -10 -17  107.03   18.43
   0  10  17   95.08   11.80
   0  10  17  123.09    8.64
   0  10  17  130.96    9.56
   0  10  17  115.74    9.94
   0  10  18   27.23    7.74
   0 -10 -18   24.13   17.00
   0  10  18    8.57    7.26
   0  10  18   15.96   10.24
   0  10  18   16.31    5.58
   0 -10 -19   15.39   18.68
   0  10  19    7.21    7.37
   0  10  19    9.66    9.65
   0  10  19   10.53    7.80
   0  10  19   16.94    5.90
   0  10  20  128.82   11.79
   0  10  20  133.00   10.69
   0 -10 -20  132.55   22.29
   0  10  20  142.96   13.62
   0  10  21  257.23   17.93
   0 -10 -21  200.64   27.22
   0  10  21  258.81   19.14
   0  10  21  227.96   16.69
   0  10  22   11.12    9.33
   0  10  22    5.99    9.49
   0 -10 -22   20.03   21.24
   0  10  22    1.18    7.04
   0  10 -22    8.82    4.94
   0  10 -22    3.21    9.62
   0 -10 -23   31.11   23.28
   0  10  23   20.72   10.09
   0  10  23   30.93    9.31
   0  10 -23   22.45   10.03
   0  10  23   12.85    7.32
   0  10 -23   20.97    5.35
   0 -10  24  -13.61    9.88
   0  10  24    6.59   10.08
   0  10 -24   12.93    5.29
   0  10  24   13.96    9.91
   0  10 -24   19.99   10.95
   0  10  24   11.51    7.65
   0 -10 -24  -13.70   24.15
   0 -10 -25   48.11    4.95
   0  10  25   64.97    9.57
   0 -10 -25   48.62   25.62
   0  10  25   64.04   11.64
   0  10  25   64.01   10.18
   0  10 -25   42.32    6.15
   0  10 -25   61.99   11.99
   0 -10  25   72.67   10.88
   0 -10 -26    8.78    4.42
   0  10  26   32.87   10.82
   0  10 -26    4.87   12.48
   0  10 -26    8.17    5.64
   0  10  26   15.26   11.64
   0  10  26   13.01    9.08
   0 -10 -26   24.08   26.89
   0 -10  26    3.05   11.09
   0  10 -27   62.37    6.52
   0  10  27   34.81    9.68
   0  10 -27   48.10   14.73
   0  10  27   59.51   13.48
   0 -10 -27   36.75   28.27
   0 -10  27   94.76   12.04
   0 -10  28   58.97   11.89
   0 -10 -28   41.22   29.35
   0  10 -28   41.24   15.45
   0  10  28   34.64    9.97
   0  10  28   58.54   13.19
   0  11   0   -4.23    1.73
   0 -11   0   -1.84    1.59
   0  11   0    0.54    5.23
   0  11   1   32.28    2.54
   0  11  -1   19.15    5.97
   0 -11   1   28.75    6.87
   0  11   1   24.78    4.75
   0 -11   1   22.75    2.37
   0 -11  -1   26.20    6.14
   0  11   1   28.69    9.34
   0 -11  -1   28.79    2.53
   0 -11  -2  179.42   12.24
   0 -11   2  195.52   10.98
   0  11   2  206.28   12.05
   0  11  -2  168.12   12.94
   0 -11   2  194.73   13.86
   0  11   2  189.17   11.09
   0  11   2  168.78   15.77
   0 -11  -2  190.67   11.10
   0 -11   3  506.30   30.17
   0  11   3  595.21   33.12
   0  11   3  503.05   30.26
   0 -11  -3  603.87   30.31
   0 -11  -3  548.07   31.06
   0  11   3  555.57   30.83
   0  11   4  381.11   22.30
   0 -11  -4  408.34   23.01
   0  11   4  449.01   25.46
   0  11   5  486.15   30.42
   0 -11  -5  521.74   31.06
   0 -11  -5  534.32   33.18
   0  11   5  548.90   30.19
   0 -11  -6   87.50    6.21
   0 -11  -6  105.54   12.21
   0  11   6   85.49    5.79
   0 -11  -6   91.14    7.34
   0 -11  -7   20.98   11.96
   0 -11  -7   31.99    3.67
   0 -11  -7   23.26    3.19
   0 -11  -7   22.30    5.36
   0  11   7   21.49    3.60
   0 -11  -8  282.75   18.13
   0 -11  -8  327.00   17.92
   0 -11  -8  292.15   22.51
   0  11   8  316.28   17.99
   0  11   9  190.74   10.66
   0 -11  -9  177.60   10.71
   0 -11  -9  189.97   16.46
   0 -11  -9  157.52   10.39
   0 -11 -10  123.93   14.48
   0 -11 -10  126.36    8.50
   0 -11 -10  123.03    8.03
   0  11  10  122.20    8.28
   0  11  10  132.39    7.51
   0  11  10  130.61   13.42
   0 -11 -11  785.57   49.93
   0  11  11  838.48   46.38
   0  11  11  827.61   48.65
   0 -11 -11  786.22   46.62
   0 -11 -12  554.67   29.78
   0  11  12  509.96   29.43
   0 -11 -12  579.68   34.98
   0  11  12  572.42   32.14
   0  11  13   53.42    6.32
   0 -11 -13   50.15    4.89
   0  11  13   43.39    9.62
   0 -11 -13   23.56   13.91
   0 -11 -14    7.99    3.84
   0  11  14   10.33    9.00
   0 -11 -14    4.91   15.64
   0  11  14   -2.90    5.64
   0 -11 -15   55.65    3.48
   0  11  15   61.11   10.71
   0  11  15   55.83    7.32
   0 -11 -15   76.62   16.88
   0 -11 -15   71.27    5.50
   0 -11 -16  220.55   21.82
   0 -11 -16  182.28   12.13
   0  11  16  230.11   13.56
   0  11  16  230.41   16.13
   0 -11 -16  191.96   11.12
   0  11  16  208.83   12.37
   0  11  17  453.56   28.32
   0 -11 -17  436.63   33.16
   0  11  17  439.44   26.11
   0 -11 -17  440.16   25.97
   0  11  17  475.63   26.64
   0  11  18   -9.18   10.03
   0  11  18  -10.43    7.44
   0  11  18    3.36    5.84
   0  11  18    8.09    7.49
   0  11  19  123.68   13.07
   0  11  19  127.53   10.90
   0  11  19  116.15   10.74
   0 -11 -19  100.14   21.47
   0  11  19  115.38    9.36
   0 -11 -20  146.08   23.22
   0  11  20  165.41   13.05
   0  11  20  158.01   15.34
   0  11  20  151.11   11.90
   0 -11 -21   18.76    2.93
   0  11  21   16.85    7.25
   0 -11 -21   -1.83   21.33
   0  11  21    9.10    8.50
   0  11  21   10.66    9.00
   0  11  21    4.34   11.58
   0  11  22   37.91    9.36
   0  11  22   36.09   12.21
   0 -11 -22   60.51   23.35
   0  11  22   31.27    7.63
   0 -11 -22   39.97    3.76
   0  11 -22   41.01    5.53
   0  11 -22   40.88    9.58
   0  11  22   37.91   10.45
   0  11  23    9.66    7.65
   0 -11 -23   10.81    3.30
   0  11 -23   10.88    9.95
   0 -11 -23   -9.79   23.62
   0  11  23    9.58    8.94
   0  11 -23    9.12    5.38
   0  11  23   27.99    9.90
   0  11  24   -5.96    8.09
   0  11 -24    9.95    5.44
   0 -11 -24   -1.01   24.55
   0 -11 -24   -6.79    3.48
   0  11  24    0.95    9.32
   0 -11  24    3.32    9.36
   0  11  24    1.50   10.84
   0  11 -24    9.72   10.68
   0  11 -25   39.82    6.37
   0  11 -25   42.56   12.36
   0 -11 -25   24.01   26.28
   0  11  25   48.51   10.31
   0 -11  25   31.94   10.30
   0  11  25   37.89    8.95
   0 -11 -25   43.21    4.62
   0  11  25   54.48   12.21
   0  11  26   30.67    9.00
   0  11  26   23.70   11.03
   0  11 -26   33.50    6.19
   0  11  26   61.79   12.14
   0 -11 -26   15.08   27.63
   0 -11  26   24.57   10.87
   0  11 -26   19.76   12.54
   0 -11 -27  270.83   33.74
   0  11 -27  202.42   18.39
   0  11  27  217.71   15.83
   0 -11  27  257.61   16.98
   0  11 -27  189.59   13.40
   0  11  27  252.09   18.45
   0 -12   0 1002.68   59.15
   0  12   0 1086.67   59.17
   0 -12   0 1114.69   60.25
   0  12   0 1079.52   60.00
   0  12  -1   84.24    8.34
   0 -12   1   92.55    5.61
   0  12   1   90.69    5.70
   0  12   1   87.03   12.30
   0 -12  -1   89.52    5.62
   0  12   1   95.60    8.06
   0 -12  -1   97.41    8.70
   0 -12   1   87.72    9.10
   0  12   2   47.35    6.28
   0 -12   2   54.60    3.48
   0  12   2   52.52    3.75
   0  12  -2   54.04    7.65
   0 -12  -2   46.51    6.36
   0 -12   2   34.42    7.73
   0  12   2   41.14   11.40
   0 -12  -2   47.79    3.76
   0  12   3  105.08    6.76
   0  12   3   99.53   13.49
   0  12   3   98.83    8.13
   0 -12  -3  132.77    6.87
   0 -12   3  101.41    6.51
   0 -12  -3  106.45    8.79
   0  12  -3  110.59    9.91
   0  12   4   82.68    5.50
   0 -12  -4   79.77    7.61
   0  12   4   72.18   12.29
   0  12   5   39.67    2.54
   0  12   5   38.11    3.66
   0  12   5   36.62   11.10
   0 -12  -5   41.48    5.91
   0 -12  -6  737.85   44.26
   0  12   6  777.24   43.67
   0 -12  -6  678.09   46.23
   0 -12  -6  798.04   43.83
   0 -12  -7   10.55    3.78
   0 -12  -7   13.90    3.14
   0  12   7   14.36    3.09
   0 -12  -7   26.12   11.16
   0 -12  -7   15.19    5.46
   0 -12  -8  160.53   10.25
   0 -12  -8  164.74   11.45
   0 -12  -8  172.87   10.65
   0  12   8  181.91   10.47
   0 -12  -8  172.38   15.68
   0  12   9   -2.24    3.74
   0 -12  -9   -1.45    3.16
   0 -12  -9    4.10    3.99
   0 -12 -10   22.27    4.43
   0  12  10   33.90    3.83
   0 -12 -10   20.76    3.60
   0 -12 -10   21.62   13.59
   0  12  10   22.86    2.46
   0  12  10    8.33   10.24
   0  12  11   25.21    2.35
   0  12  11   23.55   11.43
   0 -12 -11   22.07   12.78
   0  12  11   19.76    4.67
   0 -12 -11   21.87    3.84
   0  12  12   90.63    5.68
   0  12  12  112.16   12.03
   0 -12 -12  116.58   14.05
   0 -12 -12  101.24    6.71
   0 -12 -13   -3.53   14.55
   0  12  13    7.49    9.67
   0 -12 -13   -0.81    3.80
   0  12  14   94.99   11.50
   0 -12 -14   84.57   17.38
   0 -12 -14   86.69    6.59
   0  12  15   33.06    7.09
   0 -12 -15   23.66   16.98
   0 -12 -15   28.00    4.65
   0  12  15   43.60   10.74
   0  12  16  144.77   10.76
   0 -12 -16  128.65    9.26
   0 -12 -16  147.24   20.44
   0  12  16  140.42   13.72
   0  12  17  -11.19   10.74
   0 -12 -17   -2.68    5.06
   0 -12 -17   15.60   17.49
   0  12  17   -0.92    7.32
   0 -12 -18   18.05    5.60
   0 -12 -18   20.29    1.84
   0 -12 -18   21.28   19.22
   0  12  18   11.36   10.61
   0  12  18   32.62    7.67
   0  12  19   46.75   11.52
   0 -12 -19   69.65   21.09
   0 -12 -19   51.77    3.52
   0  12  19   56.65    8.34
   0  12  20  220.74   17.85
   0  12  20  230.76   15.39
   0  12  20  248.25   15.83
   0  12  20  236.55   14.54
   0 -12 -20  228.24   26.03
   0 -12 -20  219.59   12.80
   0  12  21   22.61    9.53
   0  12  21   16.41    8.50
   0 -12 -21    1.89   22.60
   0  12  21   30.91   12.23
   0 -12 -21   25.63    2.83
   0  12  21   21.67    6.98
   0  12  22  186.20   12.97
   0  12  22  209.21   14.01
   0  12  22  188.91   14.48
   0 -12 -22  145.65   26.67
   0  12  22  217.79   16.65
   0 -12 -22  176.34   10.61
   0  12 -23   -4.73    5.93
   0 -12 -23    2.02   23.75
   0 -12 -23   12.38    2.95
   0  12  23    9.36   13.13
   0  12 -23    1.92    9.81
   0  12  23   14.96    9.42
   0  12  23   10.47    7.50
   0  12  23   -2.92   10.07
   0 -12 -24   18.37    3.29
   0  12  24   26.35    8.40
   0  12 -24   18.04    6.01
   0  12  24   35.32    9.68
   0  12 -24   37.87   10.42
   0  12  24   24.42   10.87
   0 -12 -24   34.40   25.00
   0 -12 -25   19.31    3.69
   0 -12  25   26.45   10.34
   0  12  25   37.88   10.44
   0 -12 -25   37.62   26.36
   0  12 -25   34.03    6.32
   0  12  25   15.94   11.66
   0  12 -25   35.35   11.59
   0  12  25   47.72    8.91
   0  12 -26    3.43    6.11
   0 -12  26    6.17   10.42
   0 -12 -26   14.41   28.13
   0  12  26    6.10   11.99
   0  12  26   25.58    8.65
   0  12 -26   22.86   12.41
   0  12  26    5.10   10.55
   0  12  27   -6.56   10.13
   0  12 -27  -10.49   13.66
   0  12  27   -2.89   12.82
   0 -12  27   14.38   11.86
   0  12 -27    0.19    6.15
   0  13   0    1.83    2.36
   0  13   0    7.41    6.02
   0 -13   0    5.21    7.36
   0 -13   0   -0.59    2.04
   0  13   1   20.89   10.67
   0  13  -1   16.59    6.51
   0 -13   1   20.57    2.21
   0 -13  -1   27.17    6.73
   0  13   1   19.20    2.63
   0 -13  -1   16.52    2.45
   0 -13   1   16.33    7.55
   0  13   1    9.51    5.73
   0  13   2  324.99   21.86
   0 -13   2  301.70   20.08
   0 -13   2  311.92   17.50
   0  13   2  303.09   17.62
   0  13   2  290.06   18.45
   0 -13  -2  308.80   19.18
   0  13  -2  304.20   19.61
   0 -13  -2  308.84   17.59
   0  13   3  178.17   10.87
   0 -13  -3  207.94   11.00
   0 -13   3  182.27   14.33
   0  13   3  187.17   12.04
   0 -13   3  176.56   10.72
   0  13   3  207.45   16.53
   0 -13  -3  184.84   12.68
   0  13  -3  173.60   13.19
   0  13  -4  324.04   21.98
   0  13   4  329.65   19.77
   0  13   4  368.88   23.65
   0 -13  -4  380.50   21.00
   0 -13   4  347.55   19.58
   0  13   5 1063.11   67.06
   0  13   5 1150.54   64.32
   0  13   5 1139.99   64.55
   0 -13  -5 1117.93   65.19
   0  13   6  245.01   16.14
   0 -13  -6  268.18   17.18
   0  13   6  282.33   15.64
   0 -13  -7  151.08   11.64
   0  13   7  170.17   10.06
   0 -13  -7  163.20   10.43
   0 -13  -7  181.07   15.80
   0 -13  -8  301.49   21.34
   0 -13  -8  297.76   17.08
   0 -13  -8  259.48   16.74
   0 -13  -8  281.53   17.96
   0  13   8  313.94   16.84
   0 -13  -9    3.82    6.41
   0 -13  -9    3.92    3.42
   0 -13  -9   -1.82   13.02
   0 -13  -9    0.57    4.16
   0  13   9   -2.43    3.94
   0  13  10   95.19    7.21
   0 -13 -10   97.64    7.46
   0 -13 -10  102.78   15.24
   0  13  10  107.09    6.40
   0 -13 -10  108.14    7.03
   0  13  11   70.97   11.65
   0 -13 -11   72.20    5.70
   0  13  11   74.55    4.74
   0 -13 -11   76.73    6.61
   0 -13 -11   85.75   15.12
   0  13  11   65.80    6.10
   0  13  12  147.64   14.23
   0 -13 -12  110.78   16.98
   0  13  12  138.47    8.37
   0 -13 -12  142.76    9.07
   0  13  12  162.16    9.63
   0 -13 -13   43.20   15.64
   0  13  13   50.52    6.03
   0  13  13   44.58    3.31
   0 -13 -13   48.93    4.84
   0  13  13   60.92   11.29
   0 -13 -14    4.72    4.44
   0  13  14   -8.29   10.73
   0 -13 -14    9.93   16.20
   0  13  15   28.16   11.52
   0 -13 -15   27.98    4.74
   0  13  16  291.70   19.87
   0 -13 -16  276.79   24.63
   0 -13 -16  255.43   15.85
   0  13  17  288.03   20.32
   0  13  17  256.07   17.59
   0 -13 -17  222.13   25.01
   0 -13 -17  280.24   16.37
   0 -13 -18  284.31   16.79
   0  13  18  293.26   20.43
   0  13  18  250.67   18.13
   0 -13 -18  263.40   27.51
   0  13  19   23.19    8.60
   0 -13 -19   14.63   20.93
   0  13  19    5.39   11.98
   0 -13 -20   16.08   21.90
   0  13  20   33.13   12.65
   0  13  20   35.83    9.13
   0 -13 -21  -15.63   23.08
   0  13  21    6.87    9.59
   0  13  21    9.83   12.44
   0 -13 -22   22.24    1.99
   0  13  22   21.17   12.83
   0  13  22   29.40    8.18
   0 -13 -22   32.29   24.60
   0  13  22    6.88    9.89
   0 -13 -23   14.58   25.31
   0  13  23   14.82    9.30
   0  13 -23    8.87    5.82
   0  13  23   10.41   12.78
   0  13  23   17.38   11.00
   0 -13 -23   10.30    1.96
   0  13 -24   48.34   11.06
   0 -13 -24   33.88    2.94
   0  13  24   39.05    9.98
   0  13 -24   32.26    6.27
   0  13 -25   60.86   12.30
   0  13 -25   64.14    7.28
   0  13  25   76.32   11.17
   0  13  25   57.98   12.19
   0 -13 -25   81.69   28.04
   0 -13 -26   41.95   30.73
   0  13 -26   44.30    7.36
   0  13 -26   31.59   12.74
   0  13  26   56.40   12.83
   0 -13  26   62.98   11.45
   0  13 -27   43.00    6.78
   0 -13 -27   34.90   29.81
   0  13  27   58.18   13.63
   0  13 -27   51.79   13.38
   0 -13  27   44.62   11.90
   0  14   0   47.53   10.68
   0 -14   0   39.84    8.31
   0  14   0   31.92    7.40
   0 -14   0   31.50    2.98
   0  14   1   15.91    5.87
   0  14   1    0.49   10.31
   0 -14   1   17.03    8.70
   0 -14  -1   15.14    2.42
   0  14  -1    6.06    6.68
   0  14   1   15.75    2.71
   0 -14  -1   20.57    7.61
   0 -14   1   13.79    2.46
   0 -14   2   27.92    2.75
   0 -14  -2   33.60    7.42
   0 -14  -2   26.68    3.17
   0  14   2   22.00    6.14
   0  14  -2   38.26    8.09
   0 -14   2   20.47    8.88
   0  14   2   10.94   10.52
   0  14   2   25.79    3.18
   0  14  -3   97.18   10.02
   0 -14   3   96.37   11.12
   0  14   3   88.01   12.66
   0 -14  -3   94.64    8.70
   0 -14   3   91.87    5.53
   0  14   3   81.78    7.81
   0  14   3   79.19    5.87
   0  14  -4  144.39   11.94
   0 -14   4  125.25    7.66
   0  14   4  124.32    9.62
   0 -14  -4  120.56   10.19
   0  14   4  133.01    8.00
   0  14   4  139.63   15.67
   0 -14  -5  459.31   27.93
   0  14   5  470.02   26.53
   0  14   5  480.09   26.86
   0  14   5  441.58   30.54
   0  14  -5  459.43   28.74
   0  14   6   14.01    3.57
   0 -14  -6   13.20    5.71
   0  14  -6    4.79   10.02
   0  14   6   16.64    1.54
   0 -14  -7  484.62   28.27
   0  14   7  507.61   28.02
   0 -14  -7  452.03   28.89
   0 -14  -7  488.88   32.14
   0 -14  -8   22.15    3.81
   0 -14  -8    9.41    6.13
   0 -14  -8   17.95   12.30
   0 -14  -8   17.96    4.52
   0  14   8   19.22    3.95
   0 -14  -9   10.49    3.80
   0 -14  -9    7.53   13.18
   0 -14  -9   16.78    6.42
   0 -14  -9   16.39    4.23
   0  14   9   11.82    4.03
   0  14  10  281.68   15.97
   0 -14 -10  276.16   16.30
   0 -14 -10  224.97   21.73
   0 -14 -10  271.06   17.74
   0  14  10  268.62   16.49
   0 -14 -10  288.57   16.64
   0  14  11    7.32   12.73
   0  14  11   10.58    2.53
   0 -14 -11   11.13    3.92
   0 -14 -11   17.73    7.32
   0 -14 -11    0.69   13.56
   0  14  11    9.04    4.64
   0 -14 -11   13.82    4.81
   0 -14 -12   87.40    6.50
   0  14  12   85.29    6.72
   0 -14 -12   94.31   14.79
   0 -14 -12   95.06    7.11
   0  14  12   76.07    5.25
   0  14  12  105.20   13.63
   0  14  13    6.81    5.18
   0 -14 -13   -4.15    3.99
   0  14  13    6.58   11.46
   0  14  13    2.48    2.22
   0  14  14  -17.44   11.96
   0 -14 -14    4.58    4.35
   0 -14 -14  -11.81   17.52
   0  14  14    5.27    5.36
   0  14  15  258.01   16.77
   0 -14 -15  271.12   24.97
   0 -14 -15  281.01   16.39
   0  14  15  284.56   20.63
   0 -14 -16   27.97   19.46
   0  14  16    7.04   12.20
   0 -14 -16   14.05    5.17
   0 -14 -17   51.91   20.10
   0  14  17   42.59   12.52
   0 -14 -17   42.79    5.81
   0  14  18   62.31   13.85
   0 -14 -18   98.21    7.70
   0 -14 -18   78.37   21.72
   0 -14 -19   -9.42   21.67
   0  14  19   -1.16   12.84
   0 -14 -19    1.19    5.61
   0 -14 -20   27.22   22.71
   0  14  20  -11.02   13.11
   0  14  21  335.39   24.79
   0 -14 -21  318.19   32.41
   0  14  21  367.11   22.76
   0  14  22   38.07   14.07
   0 -14 -22   56.92   24.18
   0  14  22   35.58   11.06
   0 -14 -23   13.87   26.53
   0  14 -23    9.56    5.88
   0  14  23  -15.34   13.36
   0  14  23   -1.54   10.59
   0  14  24   16.79    9.63
   0  14  24    3.49   11.40
   0  14  24    3.30   14.49
   0 -14 -24   -8.76   27.61
   0  14 -24    3.44    6.19
   0  14  25   -4.83   10.55
   0  14  25   -7.83   12.14
   0  14 -25    9.47    6.41
   0 -14 -25   -5.62   28.13
   0  14 -25    0.53   11.82
   0  14 -26    5.35    6.52
   0  14 -26   32.19   12.53
   0  14  26    2.62   12.68
   0 -14  26    9.54   11.47
   0  15   0   -7.07   11.87
   0 -15   0   -0.41    2.43
   0  15   0  -10.89    6.82
   0 -15   0   -2.26    8.43
   0  15   1    3.17   11.40
   0  15   1   -1.33    2.77
   0  15  -1  -10.77    7.21
   0 -15   1   -1.10    2.29
   0 -15  -1   -7.55    7.75
   0  15   1   -4.04    5.93
   0 -15  -1    0.16    2.52
   0 -15   1    1.39    8.89
   0 -15  -2   14.76    7.72
   0  15   2    6.69   11.54
   0 -15   2    8.40    9.45
   0  15  -2    1.13    8.15
   0  15   2   21.06    6.76
   0  15   2   13.77    3.16
   0 -15   2   15.34    2.44
   0 -15  -2   16.75    2.88
   0  15   3  178.42   12.17
   0 -15   3  165.44   10.20
   0  15  -3  196.31   13.56
   0  15   3  150.91   16.43
   0  15   3  186.77   10.44
   0 -15   3  164.01   14.19
   0 -15  -3  164.75   12.94
   0  15   4  107.66    8.33
   0 -15  -4   90.67    9.16
   0  15   4   88.50    6.20
   0  15  -4  104.37   10.48
   0 -15   4   87.39    5.76
   0  15   4   85.37   14.83
   0  15   5   64.81   14.50
   0 -15  -5   46.66    7.65
   0  15   5   51.58    4.66
   0 -15   5   53.85    3.89
   0  15  -5   49.02    9.27
   0  15   5   54.41    3.50
   0 -15  -6  159.55   12.58
   0  15   6  121.31   17.71
   0  15   6  160.71   10.47
   0  15  -6  163.05   14.36
   0  15   6  173.30    9.72
   0  15  -7   18.35    9.23
   0  15   7   22.37    3.81
   0 -15  -7   31.71    7.41
   0  15   7   23.90    1.75
   0 -15  -7   26.04    4.82
   0 -15  -8    0.91    4.57
   0 -15  -8    2.51   12.86
   0  15   8    0.54    3.78
   0 -15  -8  -10.17    6.79
   0 -15  -8    1.57    3.66
   0 -15  -9   11.88    7.41
   0  15   9   12.55    4.21
   0 -15  -9   12.85    3.87
   0 -15  -9    6.97    4.60
   0 -15  -9   27.37   14.64
   0 -15 -10  312.85   19.56
   0 -15 -10  326.78   20.63
   0 -15 -10  330.97   25.14
   0  15  10  356.95   18.95
   0 -15 -10  296.14   19.21
   0  15  10  333.38   19.43
   0 -15 -11   19.38    7.38
   0  15  11   -1.13   13.08
   0 -15 -11   19.82    4.29
   0  15  11   24.99    4.64
   0  15  11   28.35    2.95
   0 -15 -11    3.56   13.86
   0 -15 -11   23.57    5.59
   0  15  12  162.84   17.44
   0 -15 -12  162.39   11.98
   0 -15 -12  163.08   13.46
   0  15  12  187.80   10.65
   0 -15 -12  173.29   19.20
   0 -15 -12  185.34   11.31
   0  15  12  179.14   11.61
   0  15  13  118.02   15.48
   0 -15 -13  130.94   17.67
   0  15  13  123.00    8.80
   0  15  13  117.54    7.30
   0 -15 -13  123.11    8.32
   0  15  14   68.90    4.54
   0  15  14   56.72   13.68
   0 -15 -14   58.13    5.93
   0  15  14   73.95    7.07
   0 -15 -14   49.05   18.10
   0 -15 -15   37.83   18.51
   0  15  15   36.96    6.27
   0 -15 -15   47.55    5.51
   0  15  15   20.51   11.96
   0 -15 -16  389.34   22.72
   0  15  16  363.42   26.77
   0 -15 -16  340.80   30.53
   0  15  16  400.52   23.22
   0  15  17   51.70    7.46
   0  15  17   78.19   13.54
   0 -15 -17   50.40   21.01
   0 -15 -17   53.17    6.53
   0  15  18   25.48   13.23
   0 -15 -18   22.38   21.99
   0 -15 -18   43.91    6.21
   0 -15 -19    9.62   22.20
   0  15  19   23.46   13.54
   0 -15 -19   17.86    6.12
   0  15  20    3.62   13.50
   0 -15 -20    7.96   22.71
   0 -15 -21   26.68   23.56
   0  15  21   32.11   13.96
   0 -15 -22   20.06   25.15
   0  15  22   38.67   14.42
   0  15  23   24.95   14.40
   0  15 -23   -3.16    5.99
   0 -15 -23  -13.01   26.64
   0  15  24   22.65   14.83
   0 -15 -24   20.07   27.55
   0  15 -24   28.39    6.94
   0  15 -25   -9.41    6.77
   0  15 -25    4.19   11.53
   0  15  25   -4.25   15.32
   0 -15 -25    3.44   27.52
   0  15 -26   55.30   12.67
   0 -15 -26   46.89   30.14
   0  15 -26   29.14    7.19
   0 -16   0  134.20   12.90
   0  16   0  134.45   14.96
   0  16   0  154.36   11.78
   0 -16   0  150.06    8.91
   0  16   1   93.99    6.82
   0  16   1  112.47    9.52
   0 -16  -1  105.38    6.80
   0 -16   1   95.81   11.48
   0 -16   1  108.42    6.61
   0  16  -1  137.31   10.26
   0 -16  -1  124.15   11.05
   0  16   1  138.37   14.12
   0  16  -2  129.48   11.00
   0 -16  -2  141.70    8.37
   0 -16  -2  109.10   11.34
   0  16   2  132.30    8.26
   0  16   2  146.29   10.75
   0  16   2  127.88   16.36
   0 -16   2  127.08    7.97
   0 -16   2  130.66   12.38
   0 -16  -3   -1.77    7.58
   0  16   3    2.78    6.38
   0  16   3   20.07   13.76
   0  16   3   -1.20    3.37
   0  16  -3    3.55    7.28
   0 -16   3   -0.16    2.48
   0 -16   3    1.21    9.73
   0  16  -4   76.45   10.17
   0 -16  -4   72.24    8.71
   0  16   4   40.77   14.16
   0  16   4   63.00    4.89
   0 -16   4   49.43    4.05
   0  16   4   74.97    7.70
   0  16   5   36.62    4.28
   0  16  -5   36.35    9.86
   0  16   5   37.75    2.80
   0  16   5   19.14   13.48
   0 -16  -5   42.04    7.93
   0 -16   5   35.18    3.23
   0 -16   6   55.27    4.08
   0  16   6   57.23    5.11
   0  16  -6   48.73   11.33
   0  16   6   42.73   14.30
   0  16   6   54.50    3.48
   0 -16  -6   49.57    7.99
   0  16  -7  209.00   18.41
   0 -16  -7  248.82   15.45
   0  16   7  253.23   14.21
   0  16   7  252.96   14.95
   0 -16  -7  224.26   16.51
   0 -16  -8  138.10    8.85
   0  16  -8  130.76   13.81
   0 -16  -8  140.44    9.27
   0  16   8  136.76    8.92
   0 -16  -8  110.69   10.94
   0  16   9   19.83    4.91
   0 -16  -9   37.95    5.57
   0 -16  -9   10.23   13.05
   0 -16  -9   19.28    7.72
   0  16  -9   39.55   12.41
   0 -16  -9   34.50    4.65
   0  16  10    3.04    4.52
   0 -16 -10    6.81    7.76
   0 -16 -10   10.37    4.16
   0 -16 -10   14.46    5.23
   0 -16 -11   28.30    8.25
   0  16  11   12.12    3.19
   0  16  11    9.01    5.07
   0 -16 -11   15.33    4.44
   0 -16 -11   10.26   15.75
   0 -16 -11    8.75    5.37
   0 -16 -12   15.10    5.74
   0 -16 -12   14.28    8.35
   0  16  12   28.49    5.49
   0  16  12   38.51   13.81
   0  16  12   22.45    3.26
   0 -16 -12   17.51   17.02
   0 -16 -12   19.41    4.75
   0  16  13    2.69    2.80
   0 -16 -13   22.22   17.12
   0  16  13    9.35    5.48
   0 -16 -13    4.56    8.52
   0 -16 -13    1.25    4.70
   0  16  13    7.19   13.53
   0 -16 -14   14.06   16.58
   0 -16 -14   32.39    5.42
   0  16  14   27.72    6.19
   0  16  14   40.38    3.53
   0 -16 -14   29.92    9.48
   0 -16 -15  352.64   19.99
   0 -16 -15  306.38   28.70
   0  16  15  326.56   20.31
   0  16  15  324.09   24.44
   0  16  16  173.09   17.51
   0 -16 -16  165.45   11.41
   0 -16 -16  134.70   22.91
   0  16  16  182.20   12.14
   0  16  17   24.83    7.38
   0 -16 -17   36.76    5.99
   0 -16 -17   11.02   21.80
   0  16  17   29.05   13.66
   0 -16 -18    9.35    5.84
   0 -16 -18   15.23   20.84
   0  16  18   -2.26   13.77
   0  16  18   10.02    7.71
   0 -16 -19   18.63   23.70
   0  16  19   10.65    8.12
   0 -16 -19   -0.99    6.03
   0  16  19   18.56   14.30
   0  16  20   33.78   14.10
   0 -16 -20   38.37   23.96
   0 -16 -20   37.97    6.58
   0 -16 -21   29.28   25.43
   0  16  21  111.39   15.67
   0  16  22  141.23   17.34
   0 -16 -22  136.64   28.00
   0  16  23   16.76   15.45
   0 -16 -23   12.09   26.40
   0  16 -24    9.37    6.62
   0 -16 -24  -23.73   27.48
   0  16  24   -5.23   15.20
   0  16 -25    0.24    7.01
   0  16  25  -12.01   15.68
   0  17   0    5.61    7.71
   0 -17   0   -2.30    2.82
   0 -17   0   -8.23    9.52
   0  17   0    1.74   12.52
   0  17  -1   85.21    9.20
   0 -17  -1   84.36    5.46
   0 -17  -1   82.80   10.26
   0  17   1   63.95    5.44
   0  17   1   75.78   14.83
   0 -17   1  106.67   11.84
   0 -17   1   73.79    5.14
   0  17   1   80.81    8.48
   0 -17   2    1.62    2.66
   0 -17   2    2.90   10.17
   0  17   2   -2.63    7.06
   0  17   2    6.91    3.26
   0  17  -2    2.74    8.09
   0  17   2    5.10   12.71
   0 -17  -2    8.34    3.98
   0 -17  -2   17.76    8.77
   0 -17   3  243.25   14.98
   0  17   3  276.50   21.32
   0  17  -3  253.92   17.68
   0 -17   3  276.69   19.23
   0 -17  -3  254.03   17.69
   0  17   3  246.51   16.75
   0  17   3  288.27   15.27
   0  17  -4  106.55   11.22
   0  17   4  137.18    9.93
   0 -17  -4  118.92   11.25
   0  17   4  108.03    7.66
   0 -17   4  113.57    7.03
   0  17   4  103.49   16.87
   0  17   5  661.96   43.48
   0  17   5  695.84   39.42
   0 -17   5  691.52   39.19
   0  17   5  692.60   39.08
   0  17  -5  700.55   41.45
   0 -17  -5  710.07   40.76
   0  17   6    9.15   14.55
   0  17  -6   -6.05   10.46
   0 -17  -6    2.53    8.07
   0  17   6    0.73    4.18
   0 -17   6    3.69    2.53
   0  17   6    2.91    1.72
   0 -17  -7   18.72    8.55
   0 -17  -7   13.91    5.51
   0  17   7   14.22    4.53
   0  17   7   23.38    1.93
   0  17  -7   33.25   10.53
   0 -17  -8  145.58   10.16
   0  17   8  156.17    9.86
   0  17  -8  111.68   14.61
   0 -17  -8  158.50   12.33
   0  17   9   19.57    4.89
   0 -17  -9   15.89    4.31
   0 -17  -9   30.46    8.15
   0  17  -9   19.34   12.39
   0 -17  -9   13.32    5.60
   0  17  10   15.11    5.08
   0 -17 -10   12.52    4.43
   0  17 -10   16.29   13.25
   0 -17 -10    3.51    8.29
   0 -17 -10   13.29    5.32
   0  17  11  684.90   39.97
   0 -17 -11  748.20   40.27
   0 -17 -11  716.13   41.18
   0  17  11  700.11   39.65
   0 -17 -11  668.30   44.97
   0 -17 -11  680.27   39.86
   0 -17 -12   -6.07    8.98
   0 -17 -12  -21.23   16.09
   0 -17 -12    4.20    4.65
   0  17  12   -0.62   14.91
   0  17  12    8.25    3.23
   0 -17 -12   23.99    6.20
   0  17  12   16.66    5.46
   0 -17 -13   20.36    4.97
   0  17  13   18.18    3.32
   0  17  13    9.39   15.10
   0  17  13   14.58    6.03
   0 -17 -13    9.94    6.29
   0 -17 -13    5.91    9.41
   0  17  14  154.88    9.28
   0 -17 -14  147.45   21.48
   0  17  14  142.20   10.88
   0  17  14  170.67   17.73
   0 -17 -14  154.38   10.26
   0 -17 -14  157.22   13.55
   0  17  15   -1.80    6.56
   0  17  15  -11.64   14.90
   0 -17 -15    3.51   18.51
   0  17  15    3.30    2.79
   0 -17 -15    8.35   10.09
   0 -17 -15    2.93    5.31
   0  17  16    7.52    6.65
   0  17  16    3.58   14.73
   0 -17 -16  -21.78   19.93
   0 -17 -16    7.48    5.25
   0  17  17   73.63    8.74
   0 -17 -17  103.30   20.88
   0  17  17   82.85   15.54
   0 -17 -17   76.69    7.54
   0  17  18   22.46   13.93
   0 -17 -18   23.52    5.99
   0  17  18   14.26    7.96
   0 -17 -18   21.27   23.17
   0 -17 -19    3.99   23.12
   0  17  19   -2.15    7.64
   0  17  19   -0.47   14.52
   0 -17 -19   -2.89    6.03
   0 -17 -20   43.13   24.03
   0  17  20   52.28   14.93
   0 -17 -20   33.40    6.92
   0  17  20   57.69    8.96
   0 -17 -21   -2.11   24.20
   0  17  21  -12.10   14.86
   0  17  21    3.44    8.95
   0 -17 -22   66.49   26.09
   0  17  22   61.40   16.49
   0 -17 -23   -4.46   26.59
   0  17  23   33.70   16.08
   0  17  24  -11.00   15.84
   0 -17 -24   -8.01   28.22
   0  17 -24    6.99    6.97
   0  17  25   48.83   16.66
   0  17 -25   47.63    7.48
   0 -17 -25   34.06   30.70
   0 -18   0  786.59   45.38
   0 -18   0  818.55   47.71
   0  18   0  872.90   46.87
   0  18   0  824.83   49.17
   0 -18  -1    7.96    9.55
   0  18   1    7.10   13.58
   0 -18   1   -5.42    2.97
   0  18   1    4.52    7.79
   0  18  -1   -6.01    8.77
   0  18  -1    3.59   12.91
   0 -18   1  -22.79   10.01
   0 -18  -1    4.17    3.26
   0 -18  -2   23.75    4.33
   0  18   2   25.49    3.84
   0 -18   2   22.35    3.23
   0 -18  -2   16.57    9.87
   0  18   2   30.91    8.00
   0  18  -2   34.97    9.08
   0 -18   2   23.73   11.81
   0  18   2   22.95   12.63
   0  18  -3   56.49   10.10
   0 -18  -3   65.00   10.15
   0  18   3   63.10    8.40
   0  18   3   70.43   15.84
   0  18   3   57.78    5.10
   0 -18   3   56.27    4.46
   0 -18   3   78.66   12.65
   0  18  -4   56.76    9.74
   0  18   4   72.33   15.64
   0  18   4   49.20    8.06
   0  18   4   42.26    4.64
   0 -18   4   43.43    3.85
   0 -18  -4   41.57    9.46
   0  18  -5   17.26   10.53
   0  18   5   31.37    4.69
   0  18   5   33.52    2.92
   0 -18  -5   34.19    9.13
   0 -18   5   31.36    3.42
   0  18   6   56.23    5.46
   0  18  -6   53.77   11.05
   0  18   6   51.88   15.67
   0 -18  -6   54.32    9.39
   0  18   6   54.93    3.70
   0 -18   6   56.10    4.33
   0 -18   7   -0.58    2.98
   0 -18  -7    3.58    8.11
   0  18   7    1.89    1.62
   0  18  -7   11.04   11.47
   0  18   7   -1.89    4.69
   0  18   7   -0.73   15.94
   0 -18  -8   33.87    6.29
   0  18   8   55.54    5.55
   0  18  -8   43.63   12.28
   0 -18  -8   42.62    9.00
   0  18   9   80.16    6.81
   0 -18  -9   64.95   10.02
   0  18  -9   57.78   13.69
   0 -18  -9   67.09    7.45
   0 -18  -9   78.75    6.35
   0 -18 -10   48.42    6.72
   0  18  10   56.79    6.14
   0 -18 -10   52.82    9.98
   0 -18 -10   54.73    5.66
   0  18 -10   74.99   13.93
   0  18  11   17.10    3.84
   0 -18 -11   22.64    5.17
   0 -18 -11   14.81    9.19
   0 -18 -11   11.21    6.15
   0  18  11   23.48    5.90
   0 -18 -12   31.69   18.02
   0 -18 -12   63.06    6.24
   0  18  12   64.45    5.26
   0 -18 -12   57.67    7.29
   0  18  12   76.77    6.83
   0  18  12   44.65   16.95
   0 -18 -12   61.50   10.67
   0 -18 -13   24.22    5.57
   0 -18 -13   17.59   18.49
   0 -18 -13   21.26    7.20
   0  18  13   46.27   15.62
   0  18  13   23.94    6.60
   0  18  13   19.20    3.67
   0 -18 -13   20.23   10.02
   0 -18 -14    6.06   18.74
   0  18  14    3.82    3.27
   0  18  14  -13.65   15.17
   0 -18 -14   17.82    5.43
   0  18  14    3.27    6.24
   0 -18 -14   16.65   10.15
   0  18  15   23.87   15.06
   0 -18 -15  -10.73   20.61
   0  18  15   12.67    6.48
   0  18  15    3.30    3.14
   0 -18 -15    9.00   10.53
   0 -18 -15    7.46    5.69
   0 -18 -16   84.83   22.21
   0 -18 -16   77.15    7.49
   0  18  16   86.32    8.85
   0  18  16   64.63   16.34
   0 -18 -16   98.52   12.53
   0 -18 -17   -4.62   11.44
   0  18  17    3.59    7.68
   0 -18 -17   -0.77    5.77
   0  18  17   -0.52   14.93
   0 -18 -17   -8.57   21.14
   0 -18 -18    6.68    5.88
   0  18  18   -6.03   14.84
   0  18  18  -18.13    7.73
   0 -18 -18  -15.74   23.84
   0 -18 -19   29.48    6.51
   0 -18 -19   23.38   24.27
   0  18  19   24.96    8.24
   0  18  19   11.79   15.24
   0 -18 -20   26.82    6.90
   0  18  20   45.75    9.29
   0  18  20   45.56   15.80
   0 -18 -20   54.31   26.07
   0 -18 -21  -16.09   25.32
   0  18  21   22.49   15.69
   0  18  21   20.16    9.00
   0 -18 -21   13.16    6.80
   0 -18 -22  156.09   29.10
   0  18  22  135.74   18.46
   0  18  22  142.51   12.71
   0  18  23   34.55   10.72
   0  18  23   73.18   16.55
   0 -18 -23   48.59   27.87
   0  18  24    3.11   16.64
   0  18 -24   -7.56    7.25
   0 -18 -24  -37.10   28.29
   0  18  25   14.86   16.89
   0  18 -25   17.08    7.47
   0 -19   0  -11.59   11.51
   0 -19   0    2.76    3.25
   0  19   0    7.91    8.67
   0  19   0    7.88   14.40
   0 -19  -1    9.74    9.34
   0  19   1    7.53   12.82
   0  19  -1    0.63   13.91
   0  19  -1   11.01    8.74
   0 -19  -1    7.26    3.69
   0 -19   1    3.66    3.11
   0  19   1   11.18    8.24
   0 -19   1  -16.62   11.30
   0  19   2   63.86    9.08
   0 -19  -2   65.28    5.18
   0  19   2   58.52    5.20
   0  19  -2   44.89    9.86
   0 -19   2   52.34    4.45
   0 -19  -2   62.09   10.88
   0 -19   2   47.81   12.33
   0  19   2   37.94   14.38
   0  19   3  118.80   16.03
   0  19  -3  125.62   12.35
   0  19   3  114.74    7.55
   0 -19   3  106.82    7.05
   0  19   3  115.61   10.61
   0 -19  -3  112.42   12.04
   0  19   4    4.48    7.76
   0  19   4    8.60    4.13
   0 -19  -4   -0.36    9.19
   0 -19   4    0.92    2.84
   0  19  -4    9.57   10.11
   0  19   5   77.97    6.47
   0 -19  -5   85.59   10.93
   0  19   5   77.12    5.14
   0  19   5   87.44   16.72
   0  19  -5   92.08   11.58
   0 -19   5   84.89    5.53
   0  19  -6   24.02   11.48
   0 -19  -6   32.22    9.23
   0  19   6   20.95    4.85
   0  19   6   25.68    2.55
   0 -19   6   24.85    3.43
   0  19   7   -3.45    4.52
   0  19   7   11.66   15.24
   0  19  -7    0.90   11.43
   0 -19  -7   10.85    9.47
   0 -19   7    3.15    3.00
   0  19   7    6.44    1.83
   0 -19  -8   19.53    5.89
   0 -19   8   23.65    3.35
   0 -19  -8   17.40    9.69
   0  19   8   26.95    5.06
   0  19  -8   11.00   12.36
   0 -19  -9   11.21    4.97
   0  19  -9    8.07   12.56
   0 -19  -9   14.74    9.53
   0  19   9   12.83    5.43
   0 -19  -9    6.11    6.27
   0 -19 -10  102.41    8.62
   0 -19 -10  105.13    7.81
   0  19 -10   79.62   15.60
   0  19  10  103.97    8.15
   0 -19 -10   97.15   11.81
   0 -19 -11   54.13    7.43
   0  19 -11   89.49   15.84
   0 -19 -11   72.54    6.61
   0  19  11   67.39    5.57
   0 -19 -11   54.73   10.59
   0  19  11   52.19    7.09
   0  19  12  387.60   24.12
   0 -19 -12  404.02   23.85
   0 -19 -12  397.41   26.00
   0  19  12  422.18   23.43
   0  19 -12  359.51   29.30
   0 -19 -12  410.12   24.30
   0  19 -13   19.51   16.31
   0 -19 -13    5.79    7.31
   0  19  13  -13.40   16.61
   0  19  13    1.08    6.48
   0  19  13    4.95    3.72
   0 -19 -13   16.02    5.32
   0 -19 -13   30.33   10.44
   0 -19 -14   41.28   11.10
   0  19  14   59.72   17.42
   0 -19 -14   48.81    6.11
   0  19  14   50.44    7.38
   0 -19 -14   53.76    8.15
   0  19  14   37.89    4.51
   0 -19 -15   25.48    5.96
   0  19  15   26.40   17.01
   0  19  15   20.08    6.85
   0 -19 -15   20.86   10.99
   0 -19 -15   18.39   22.07
   0  19  15   25.21    3.78
   0 -19 -16  153.83   10.96
   0  19  16  163.63   11.76
   0 -19 -16  161.21   15.18
   0 -19 -16  128.66   24.10
   0  19  16  124.64   19.40
   0  19  17  100.05   17.94
   0 -19 -17   77.99   25.01
   0 -19 -17   82.69   13.47
   0  19  17  118.19    9.99
   0 -19 -17   92.44    8.54
   0  19  18   67.06    8.87
   0 -19 -18   56.24    7.22
   0  19  18   54.51   16.55
   0 -19 -18   43.77   13.15
   0  19  19    9.98    8.93
   0 -19 -19   10.78    6.49
   0  19  19   -1.04   15.83
   0 -19 -19    4.00   12.49
   0 -19 -19  -16.55   23.60
   0  19  20   18.82    9.17
   0 -19 -20   -8.27   12.96
   0 -19 -20   11.67   25.41
   0  19  20    9.14   16.35
   0 -19 -20    5.78    6.67
   0 -19 -21   16.66    7.46
   0  19  21   10.41   17.00
   0  19  21   24.96    9.76
   0 -19 -21   34.85   25.86
   0  19  22    7.94   10.24
   0  19  22    7.72   17.09
   0 -19 -22   17.96   26.78
   0  19 -22   18.93   22.06
   0  19  23  113.28   12.74
   0  19  23  106.42   18.60
   0 -19 -23  119.62   31.00
   0 -19 -24    5.87   28.81
   0  19 -24   -0.81    8.23
   0  19  24   10.80   17.42
   0  20   0  673.49   40.40
   0 -20   0  701.71   41.60
   0 -20   0  681.83   38.59
   0  20   0  637.48   43.21
   0  20  -1   89.63   17.17
   0 -20  -1  127.80    8.10
   0 -20   1  125.30   14.88
   0  20   1  128.07   11.89
   0  20  -1  115.69   12.12
   0 -20   1  112.54    7.64
   0 -20  -1  139.92   13.82
   0  20   1   74.31   17.11
   0 -20  -2   14.08   11.13
   0 -20   2  -15.17   12.79
   0  20   2    0.96    3.83
   0  20   2   13.62   14.37
   0 -20   2   -1.61    3.20
   0  20   2   -3.93    8.94
   0  20  -2  -11.37   10.18
   0 -20  -3    3.57   10.71
   0 -20   3   -0.97    3.19
   0  20   3   -0.91    4.28
   0  20   3   15.65   15.98
   0  20  -3  -21.04   10.72
   0  20   3   -0.27    8.40
   0 -20  -4   14.03   10.29
   0 -20   4    4.50    3.03
   0  20   4    4.20    8.35
   0  20  -4   -1.18   10.43
   0  20   4   21.59   17.25
   0  20   4    2.01    4.37
   0  20   5  191.74   11.25
   0  20   5  182.76   21.56
   0  20   5  188.00   12.00
   0  20  -5  210.59   16.46
   0 -20   5  192.98   11.43
   0 -20  -5  199.70   16.03
   0  20  -6   66.40   12.76
   0  20   6   62.91    4.20
   0 -20   6   54.41    4.75
   0 -20  -6   64.53   11.22
   0  20   6   61.60    6.16
   0  20   6   82.45   17.89
   0  20   7  301.75   16.94
   0  20   7  295.47   17.88
   0  20  -7  291.43   22.29
   0 -20  -7  293.62   20.61
   0  20   7  312.72   26.02
   0 -20   7  289.09   17.26
   0 -20  -8   48.32    7.15
   0  20   8   40.75   17.75
   0 -20   8   35.29    4.09
   0 -20  -8   43.55   10.34
   0  20   8   36.58    2.67
   0  20  -8   28.94   11.94
   0  20   8   39.37    5.89
   0  20  -9   17.57   13.82
   0  20   9   28.73    5.64
   0 -20  -9   20.15   10.33
   0 -20   9   15.36    3.78
   0 -20  -9   20.18    6.64
   0 -20  -9   31.08    5.48
   0 -20 -10  120.95    9.80
   0  20 -10   98.91   15.65
   0 -20 -10  116.34    8.53
   0  20  10  100.51    8.76
   0 -20 -10  112.45   12.74
   0  20 -11   -9.66   15.06
   0 -20 -11   -8.16    7.03
   0  20  11    3.38    4.12
   0  20  11  -11.94    5.88
   0 -20 -11    5.62   10.55
   0 -20 -11   -0.22    5.28
   0 -20 -12   68.89    8.02
   0  20  12   56.78    7.81
   0 -20 -12   78.03    6.90
   0 -20 -12   66.96   11.85
   0  20 -12   79.69   16.97
   0 -20 -13    8.69   10.96
   0  20 -13   -1.87   16.65
   0  20  13    4.46    4.02
   0  20  13   35.34   17.95
   0  20  13    6.25    6.73
   0 -20 -13   14.87    7.43
   0 -20 -13    2.34    5.84
   0 -20 -14    5.75   11.23
   0  20  14   10.18   16.08
   0  20 -14   12.33   16.77
   0  20  14   -5.25    7.05
   0 -20 -14    6.90    7.65
   0  20  14    5.66    3.86
   0 -20 -14   -2.02    6.01
   0  20  15  119.60   10.59
   0 -20 -15  139.01   14.47
   0 -20 -15  134.39    9.85
   0  20  15  145.68   19.80
   0  20  16    3.04   16.61
   0  20  16    3.97    7.40
   0  20  16    2.36    3.57
   0 -20 -16   -9.44   11.93
   0 -20 -16    2.59    6.11
   0 -20 -16  -17.55   22.15
   0 -20 -17  110.01   24.40
   0  20  17   91.77   18.72
   0  20  17  106.46    9.99
   0 -20 -17   97.93    8.58
   0 -20 -17   83.14   14.13
   0  20  18   87.54   10.09
   0 -20 -18   63.73   25.27
   0  20  18   81.51   17.86
   0 -20 -18   81.13    8.08
   0 -20 -18   89.98   13.85
   0  20  19   20.22    8.74
   0 -20 -19   17.17    6.49
   0 -20 -19   38.07   24.82
   0  20  19    9.23   17.33
   0 -20 -19   25.54   12.72
   0 -20 -20   -7.59    7.18
   0 -20 -20  -13.01   26.24
   0 -20 -20  -10.84   13.89
   0  20  20  -13.52    9.46
   0  20  20    6.37   16.78
   0 -20 -21  151.54   28.20
   0 -20 -21  114.26    9.74
   0 -20 -21   76.67   16.30
   0  20  21   98.59   12.13
   0  20  21  133.04   19.43
   0 -20 -22   55.98   28.07
   0  20  22   72.02   18.36
   0 -20 -22   31.47    8.19
   0  20  22   39.51   10.88
   0 -20 -22   53.11   15.09
   0  20  23   36.80   17.84
   0 -20 -23   73.69   30.15
   0 -20 -23   55.20   15.98
   0  21   0   28.10   15.37
   0 -21   0    8.71   13.13
   0  21   0    2.26   10.05
   0 -21   0   -0.07    3.68
   0 -21   1   81.02   14.26
   0 -21   1   71.79    5.52
   0  21  -1   82.47   11.57
   0 -21  -1   56.24   12.21
   0  21   1   70.88   17.93
   0  21   1   74.16   10.44
   0 -21  -1   78.65    6.40
   0  21  -1   52.16   17.09
   0 -21   2   38.58    4.09
   0 -21  -2   54.84   12.41
   0  21  -2   53.48   15.98
   0  21   2   14.35   15.65
   0 -21   2   22.65   13.24
   0  21  -2   44.55   10.98
   0  21   2   46.84    9.90
   0  21   2   40.13    4.81
   0  21   3   47.76    9.18
   0  21   3   46.57    5.12
   0  21   3   13.17   17.69
   0 -21   3   35.73    4.17
   0  21  -3   27.08   11.41
   0 -21  -3   29.26   12.20
   0  21  -4   57.05   12.47
   0  21   4   69.28   10.20
   0 -21  -4   55.82   12.35
   0 -21   4   71.72    5.20
   0  21   4   70.02    6.21
   0 -21  -5    2.77   11.53
   0  21   5    5.34    4.73
   0 -21   5    1.85    3.23
   0  21  -5  -11.19   11.76
   0  21   5   21.26   17.04
   0  21   5    3.37    2.85
   0  21  -6   18.51   12.67
   0  21   6   43.55   18.91
   0  21   6   34.36    5.63
   0 -21   6   30.62    3.89
   0 -21  -6   48.47   11.64
   0  21   6   36.20    3.23
   0  21   7  125.61    9.48
   0  21  -7  133.19   15.86
   0 -21   7  130.60    8.43
   0  21   7  148.93   20.79
   0  21   7  135.22    7.92
   0 -21  -7  147.68   13.97
   0  21  -8   -8.00   13.60
   0  21   8    3.58    5.41
   0  21   8    2.49    1.78
   0 -21  -8   -6.44    6.97
   0 -21   8    6.66    3.63
   0  21   8   15.86   18.35
   0 -21  -8    2.87   11.00
   0 -21  -9   29.52    7.00
   0  21  -9   44.06   14.45
   0  21   9   32.56    6.19
   0 -21   9   33.18    4.10
   0 -21  -9   27.13   11.01
   0  21  10  285.46   18.80
   0  21 -10  278.87   24.31
   0 -21 -10  287.82   21.79
   0 -21 -10  330.19   18.83
   0 -21  10  301.42   18.08
   0  21  10  324.62   18.28
   0 -21 -10  328.81   19.40
   0  21  11  154.61   10.13
   0 -21 -11  164.63   10.90
   0 -21 -11  138.91   14.97
   0  21  11  159.69   11.39
   0  21 -11  160.82   17.72
   0 -21 -11  159.16   11.67
   0 -21 -12  150.24   14.86
   0 -21 -12  154.09   10.55
   0 -21 -12  139.80   11.65
   0  21  12  143.64   10.93
   0  21  12  151.23    9.69
   0  21 -12  135.17   18.58
   0  21 -13   22.82   16.19
   0 -21 -13   14.31    6.00
   0  21  13   -3.73   17.83
   0  21  13   26.37    6.73
   0 -21 -13    4.26   11.86
   0  21  13   16.04    4.51
   0 -21 -13   33.95    7.65
   0  21  14    0.99    4.19
   0  21  14    5.74   18.27
   0 -21 -14    6.08   11.76
   0  21 -14   24.41   18.34
   0  21  14   -4.32    7.51
   0 -21 -14   12.54    7.48
   0 -21 -14   -0.92    5.83
   0  21  15   25.39   17.18
   0 -21 -15    0.36   11.75
   0 -21 -15    7.31    6.10
   0  21  15    2.50    6.95
   0  21  15    6.68    4.07
   0 -21 -16   65.26   14.16
   0  21  16   81.30    9.19
   0 -21 -16   84.52    8.05
   0  21 -16   38.34   19.14
   0  21  16   86.53    6.25
   0  21  16   69.59   19.09
   0 -21 -17   -5.99    6.56
   0  21  17    1.53    7.91
   0  21  17    4.30   18.32
   0 -21 -17  -15.35   12.62
   0 -21 -18   52.40   13.79
   0  21  18   37.81   18.23
   0  21  18   51.69    9.47
   0 -21 -18   50.05    7.46
   0 -21 -19   -7.60   26.19
   0 -21 -19   -2.62    6.71
   0  21  19   -0.19    9.07
   0  21  19  -27.12   17.69
   0 -21 -19   -5.85   13.70
   0 -21 -20   30.38   14.60
   0 -21 -20    5.56   26.74
   0  21  20   52.25   18.41
   0  21  20   34.71   10.20
   0 -21 -20   31.84    7.47
   0  21  21   10.39   17.78
   0 -21 -21    6.57   14.15
   0 -21 -21    0.12    7.27
   0  21  21    3.61   10.18
   0 -21 -21   21.64   27.21
   0  21  22   18.12   18.67
   0 -21 -22   29.98   15.92
   0 -21 -22   -0.13    7.66
   0 -21 -23  -27.44   29.99
   0  21 -23   14.09    8.42
   0 -21 -23   10.02   16.81
   0  22   0  177.13   21.57
   0 -22   0  194.18   18.19
   0  22   0  192.56   15.86
   0 -22   0  197.84   12.26
   0  22  -1   60.67   11.19
   0  22   1   52.47   10.87
   0 -22   1   76.98   14.24
   0  22  -1   51.21   15.41
   0 -22   1   51.62    4.92
   0  22   1   48.75   18.25
   0 -22  -1   55.33   13.13
   0  22  -2  155.42   14.98
   0 -22   2  144.77   17.76
   0 -22  -2  135.95   16.25
   0  22   2  154.87   20.61
   0 -22   2  152.59    9.57
   0  22   2  166.19   13.70
   0  22  -2  159.83   20.43
   0 -22  -3   40.58   13.25
   0  22   3   41.42   19.02
   0  22   3   35.79   10.26
   0  22  -3   54.67   11.60
   0  22   3   32.57    5.23
   0 -22   3   35.97    4.25
   0  22   4   14.53    5.08
   0  22  -4   11.88   12.25
   0 -22  -4   14.42   12.74
   0 -22   4   14.70    3.61
   0  22   4   28.07   17.92
   0  22   4   34.75    9.51
   0 -22   5    6.35    3.66
   0  22   5   35.52   19.28
   0  22   5    7.18    5.30
   0  22  -5   14.51   11.81
   0 -22  -5    7.18   11.97
   0  22   6   11.46    5.45
   0 -22   6   17.87    3.77
   0  22   6   33.03   19.49
   0  22  -6   17.79   13.47
   0  22   6   19.26    2.86
   0 -22  -6   26.83   12.69
   0  22  -6   14.79    1.50
   0 -22  -7  277.70   21.64
   0 -22   7  293.46   17.19
   0  22  -7  288.97   22.00
   0  22   7  306.11   17.95
   0  22   7  300.21   26.69
   0  22   7  294.21   16.84
   0 -22   8  122.98    7.87
   0  22   8  123.59   21.54
   0 -22  -8  126.18   10.12
   0 -22  -8  139.39   14.02
   0  22   8  114.21    7.04
   0  22   8  129.16    9.33
   0  22  -8  144.35   16.55
   0 -22   9  122.65    7.88
   0 -22  -9  115.36   10.03
   0  22   9  105.45    9.46
   0  22  -9  112.58   16.82
   0 -22  -9  138.16   14.05
   0  22  10   -3.08    6.72
   0 -22 -10   12.06   12.00
   0 -22 -10    0.50    6.07
   0  22 -10    6.75   14.40
   0 -22  10    6.42    3.91
   0 -22 -10   -3.49    7.22
   0  22  10    3.83    5.12
   0  22  11    6.36    6.69
   0 -22 -11    7.83    7.46
   0 -22 -11    7.98    6.22
   0 -22  11   -0.21    4.02
   0 -22 -11    9.42   11.77
   0  22  11    3.08    4.79
   0  22 -11    4.12   16.45
   0  22  12   14.59    7.18
   0  22 -12   27.05   16.74
   0 -22 -12   18.42    7.77
   0  22  12   13.80    4.85
   0 -22 -12   10.89    6.29
   0 -22 -12    8.89   12.03
   0 -22 -13   57.55    9.06
   0  22  13   70.44   20.18
   0 -22 -13   64.45    7.47
   0  22 -13   49.39   18.21
   0  22  13   61.55    8.46
   0  22  13   73.38    6.14
   0 -22 -13   75.68   13.05
   0 -22 -14   32.04    6.46
   0  22  14   23.06   18.99
   0 -22 -14   42.40    8.69
   0  22  14   27.03    7.90
   0  22 -14   10.05   17.71
   0  22  14   30.21    4.75
   0 -22 -14   43.56   13.09
   0  22 -15  121.83   21.25
   0  22  15  106.63    7.95
   0  22  15  107.83   10.03
   0 -22 -15  116.24    9.38
   0  22  15  154.49   21.61
   0 -22 -15  108.94   15.21
   0 -22 -16  110.18   15.10
   0  22  16   83.08    9.80
   0 -22 -16   95.98    8.40
   0  22  16   90.59    6.87
   0  22 -16   62.86   20.51
   0  22  16   90.14   20.06
   0  22 -17  -20.98   20.39
   0  22  17   19.37   18.45
   0 -22 -17    9.53    6.68
   0  22  17    1.91    8.15
   0 -22 -17  -13.77   13.88
   0  22  18   29.36    8.79
   0 -22 -18   18.02   14.09
   0  22  18   17.99   18.30
   0 -22 -18   20.65    6.85
   0  22  19   30.82   18.07
   0  22  19   20.35    9.77
   0 -22 -19   23.57    7.35
   0 -22 -19   37.12   14.80
   0 -22 -20   71.15    8.45
   0  22  20   62.78   11.03
   0  22  20  100.78   19.70
   0 -22 -20   64.12   15.08
   0  22  21  147.27   13.34
   0  22  21  142.19   21.47
   0 -22 -21  127.36   18.56
   0 -22 -21  133.05   11.34
   0 -22 -22   22.72   16.36
   0  22  22    4.45   19.50
   0 -23   0   -1.08   14.84
   0 -23   0   -4.30    5.05
   0  23   0   23.91   17.40
   0  23   0  -17.49   10.77
   0  23   1   -1.71   18.50
   0  23  -1   15.16   18.40
   0  23   1   -1.67   10.97
   0 -23   1    9.18    4.31
   0 -23  -1   -7.78   14.52
   0  23  -1   18.12   11.26
   0 -23   1   11.62   14.88
   0  23   2  123.70   20.68
   0 -23  -2   89.74   15.95
   0  23  -2  104.85   13.52
   0  23  -2   99.07   19.70
   0 -23   2  106.14    7.27
   0 -23   2  122.20   16.38
   0  23   2   88.18   12.44
   0  23  -3   46.67   12.77
   0  23   3   37.00   19.64
   0  23   3   57.83   10.75
   0 -23   3   41.79    4.66
   0  23   3   49.69    5.74
   0  23  -3   32.52   17.91
   0 -23  -3   51.52   14.35
   0 -23  -4  -12.52   13.31
   0  23   4   24.84   10.31
   0  23   4    0.33    5.29
   0  23  -4   17.29   12.06
   0  23   4   15.57   19.23
   0 -23   4    4.98    3.78
   0  23   5  179.34   11.99
   0  23   5  208.62   23.58
   0 -23   5  177.26   11.20
   0 -23  -5  206.88   18.00
   0  23  -5  227.10   18.07
   0 -23  -6   -7.44   12.95
   0  23   6    0.13    2.89
   0  23   6    7.21    5.82
   0  23   6  -20.49   19.30
   0 -23   6   -6.29    3.77
   0  23  -6   -3.80   13.29
   0 -23   7    5.54    3.76
   0  23   7   30.29   20.53
   0  23   7    9.74    6.05
   0  23  -7   20.48   14.52
   0  23   7    6.20    2.61
   0 -23  -7   -1.28   13.02
   0  23   8   20.85   20.32
   0 -23  -8   25.30   12.87
   0 -23  -8   20.73    8.12
   0  23   8   11.39    2.30
   0 -23   8   14.42    4.00
   0  23   8   13.71    6.31
   0  23  -8   39.70   15.36
   0  23   9  334.46   20.63
   0 -23  -9  322.87   24.08
   0 -23   9  345.65   19.84
   0  23  -9  304.94   26.34
   0  23   9  354.22   30.03
   0 -23  -9  350.87   21.37
   0 -23  10   66.85    5.64
   0 -23 -10   58.42   13.60
   0 -23 -10   70.18    7.46
   0 -23 -10   72.30    8.70
   0  23 -10   41.65   16.83
   0  23  10   58.64    6.61
   0  23  10   69.39    7.81
   0  23 -11   32.29   16.72
   0 -23 -11   18.73   13.10
   0  23  11   16.10    7.08
   0 -23 -11   39.83    8.25
   0  23  11   29.05    5.63
   0 -23 -11   38.04    6.36
   0 -23  11   24.79    4.42
   0 -23 -12   12.76    7.89
   0  23 -12   35.64   17.30
   0  23  12   21.53    7.23
   0 -23 -12   -5.58   13.34
   0 -23 -12    7.70    6.74
   0 -23  12   22.42    4.57
   0  23  12   17.06    5.23
   0  23  13   22.16    5.22
   0 -23 -13   20.66    8.13
   0 -23 -13   14.74    6.52
   0  23  13   10.37    7.66
   0  23 -13    5.22   17.31
   0 -23 -13    4.71   12.99
   0 -23 -14    7.56   13.01
   0  23  14    8.62   20.39
   0 -23 -14   19.32    8.66
   0  23  14   20.34    8.14
   0  23 -14   -2.71   18.48
   0  23  14   15.75    5.01
   0 -23 -14   11.93    6.66
   0 -23 -15    2.82   13.16
   0  23 -15  -18.37   19.05
   0  23  15   16.57    4.96
   0  23  15   23.12    8.08
   0  23  15  -20.11   20.66
   0 -23 -15   18.00    6.63
   0 -23 -15   -0.80    8.72
   0  23  16   32.56   20.21
   0  23  16   40.68    5.21
   0  23  16   33.72    9.00
   0 -23 -16   45.75    7.49
   0  23 -16    5.13   19.80
   0 -23 -16   47.54   14.60
   0 -23 -17   32.56    7.27
   0  23  17   47.48   20.29
   0  23  17   30.53    9.06
   0 -23 -17   10.70   14.08
   0 -23 -18   -5.86    7.08
   0  23  18  -20.16   19.39
   0  23 -18   16.50   21.46
   0 -23 -18  -21.32   14.56
   0  23  18   13.00    8.88
   0  23  19   -1.74    9.72
   0  23  19   -7.61   18.99
   0 -23 -19  -11.18    7.47
   0  23 -19  -21.07   22.70
   0 -23 -19   31.92   15.24
   0  23  20   48.23   19.84
   0 -23 -20   57.39   16.07
   0 -23 -20   42.05    7.92
   0  23  20   41.42   10.54
   0  23  21   -5.36   19.80
   0 -23 -21   27.58   16.32
   0 -24   0  324.05   26.24
   0  24   0  302.33   28.93
   0  24   0  345.93   23.03
   0 -24   1   61.27    6.26
   0  24  -1   46.42   19.53
   0 -24  -1   52.16   15.98
   0  24   1   67.42   11.93
   0 -24   1   66.71   16.97
   0  24   1   15.30   20.75
   0  24  -1   58.42   12.32
   0  24   2   48.08   21.21
   0 -24   2   25.91    4.74
   0  24  -2   13.05   18.85
   0 -24   2   58.56   17.03
   0  24   2   21.05   11.10
   0  24  -2   42.08   12.86
   0 -24  -2   19.08   15.02
   0  24   3  159.09   24.18
   0 -24   3  164.24   10.27
   0  24  -3  120.04   21.44
   0  24   3  179.01   14.81
   0  24  -3  146.95   16.16
   0 -24  -3  168.46   18.07
   0  24  -4    0.87   13.25
   0  24   4   -4.78   21.17
   0  24   4    6.33   10.31
   0  24   4    2.84    3.57
   0 -24  -4   10.36   14.47
   0 -24   4   -0.34    3.94
   0  24   4   -3.59    5.61
   0 -24   5   10.04    4.07
   0  24   5    8.41    5.69
   0  24   5   11.56   21.87
   0  24   5   10.33    3.58
   0  24  -5   -3.18   13.57
   0 -24  -5   22.11   14.06
   0 -24   6  395.39   23.71
   0  24   6  423.39   23.50
   0  24  -6  415.38   28.74
   0  24   6  402.27   24.33
   0  24   6  452.46   34.37
   0 -24  -6  425.77   28.53
   0 -24   7   13.94    3.98
   0  24   7   -1.91   21.48
   0 -24  -7   20.63   13.75
   0  24  -7    8.66   14.40
   0  24   7    9.31    6.10
   0  24   7   13.84    3.03
   0  24  -8   18.66   14.35
   0  24   8    0.94   21.37
   0  24   8    7.90    2.37
   0 -24   8   10.11    3.97
   0 -24  -8   19.84    8.07
   0 -24  -8   26.16   13.54
   0  24   8    8.36    6.42
   0  24   9    4.42    6.65
   0  24   9   16.64   20.89
   0  24  -9  -16.77   15.38
   0 -24  -9    4.34   13.58
   0 -24  -9    5.57    8.20
   0 -24   9    6.30    4.19
   0 -24 -10   -5.08   13.32
   0  24  10    6.18    5.53
   0 -24 -10   -1.59    8.32
   0 -24  10    0.82    4.06
   0  24 -10    2.92   16.52
   0  24  10   -5.59    7.09
   0 -24 -10    1.50    6.66
   0 -24 -11   14.24    6.45
   0 -24 -11   28.22   13.69
   0  24  11   10.79    7.27
   0 -24 -11   11.84    8.24
   0  24  11   14.80    5.71
   0  24 -11   11.56   16.26
   0 -24  11   20.43    4.53
   0  24  12    2.33    7.55
   0 -24 -12    1.76    8.22
   0  24 -12   10.15   17.90
   0 -24 -12    6.94    6.35
   0 -24 -12   -5.05   14.12
   0  24  12   20.02    5.43
   0 -24  12   10.98    4.56
   0 -24 -13    9.23    8.55
   0  24 -13   16.46   18.98
   0  24  13   10.02    5.43
   0 -24 -13    4.24   14.09
   0 -24  13   16.88    4.59
   0 -24 -13   18.41    6.70
   0  24  13   24.74    8.31
   0  24  14    6.29    5.12
   0  24  14  -11.36   20.96
   0 -24 -14   11.72    6.57
   0  24 -14    8.94   19.52
   0 -24 -14   19.92    8.76
   0 -24 -14    2.51   14.23
   0  24  14    1.83    8.21
   0 -24 -15   21.37    7.04
   0  24  15    8.80    8.65
   0 -24 -15   17.61    9.18
   0 -24 -15   -2.95   14.14
   0  24  15   18.49   20.79
   0  24 -15   15.68   20.01
   0  24  15   17.65    5.14
   0  24  16   92.31    7.26
   0  24  16   72.53   10.29
   0 -24 -16   84.62   15.93
   0  24 -16   79.02   21.58
   0  24  16  122.06   22.04
   0 -24 -16   83.06    8.78
   0  24 -17   -8.43   21.62
   0  24  17   36.26   20.88
   0 -24 -17   25.45   15.21
   0 -24 -17   20.46    7.24
   0  24  17   20.62    9.60
   0 -24 -18   15.33   14.80
   0  24  18   17.73   20.64
   0  24 -18   43.75   22.80
   0 -24 -18   19.79    7.51
   0  24  18   13.45    9.71
   0 -24 -19   15.07    7.86
   0 -24 -19   22.27   15.39
   0  24  19   33.50    9.89
   0  24 -19   20.52   23.42
   0  24  19   16.34   19.89
   0  24  20   34.62   10.93
   0  24  20   -1.28   20.79
   0 -24 -20   20.35   15.93
   0 -24 -21   11.08   17.21
   0 -25   0    2.38   15.83
   0  25   0   -7.11   12.35
   0  25   0   21.04   20.33
   0  25   1   71.59   22.24
   0  25  -1   30.08   12.57
   0  25   1   36.77   12.94
   0 -25   1   48.31    5.85
   0  25  -1   25.77   20.48
   0 -25   1   49.76   17.26
   0 -25  -1    6.36   15.84
   0  25   2  -19.78   11.18
   0  25  -2  -16.37   21.06
   0 -25   2   -4.32   16.43
   0  25  -2   -4.47   12.48
   0 -25   2   -1.04    4.73
   0 -25  -2   23.52   16.03
   0  25   2    3.86   21.00
   0  25   3   42.16   23.03
   0 -25   3    6.59    4.16
   0 -25  -3    8.68   15.31
   0  25   3    7.04   11.09
   0  25  -3   -0.84   18.60
   0  25  -3   -9.43   13.13
   0  25   4  100.31   12.75
   0  25   4  101.07    6.85
   0  25  -4  101.73   22.10
   0  25   4   90.35    8.05
   0  25  -4   87.05   14.98
   0 -25  -4   92.31   16.92
   0  25   4   83.39   22.56
   0 -25   4   98.87    7.03
   0 -25   5  163.73   10.40
   0 -25  -5  152.34   18.47
   0  25   5  153.28   11.32
   0  25   5  171.74   10.27
   0  25  -5  171.01   17.78
   0  25  -6   60.36   16.17
   0  25   6   77.17    5.62
   0 -25   6   78.65    6.21
   0 -25  -6   74.13   15.57
   0  25   6   97.17   23.43
   0  25   6   86.52    7.82
   0  25  -7   45.29   16.14
   0 -25   7   38.53    4.66
   0  25   7   28.96    3.59
   0  25   7   27.77    6.72
   0 -25  -7   36.22   14.49
   0  25  -8   -0.55   15.63
   0  25   8  -12.74   21.13
   0 -25  -8    6.67   14.18
   0  25   8    0.64    2.57
   0  25   8   -3.57    6.68
   0  25  -8    3.25    1.80
   0 -25  -8   12.56    8.30
   0 -25   8    0.98    4.15
   0  25   9   37.46   21.65
   0 -25  -9   29.80    8.98
   0 -25   9   29.18    4.44
   0  25   9   22.12    7.29
   0 -25  -9    6.48   14.11
   0  25  -9   30.10   16.73
   0 -25  10   56.75    5.39
   0  25  10   53.39    8.12
   0 -25 -10   57.90   15.00
   0 -25 -10   60.19    7.75
   0  25 -10   37.31   17.24
   0  25  10   52.58   22.51
   0 -25 -10   55.07    9.45
   0  25  10   51.06    6.64
   0  25 -11   58.80   17.75
   0  25  11   34.51    8.19
   0 -25 -11   51.49    7.15
   0 -25  11   45.03    5.19
   0 -25 -11   48.97   14.69
   0 -25 -11   48.65    9.52
   0  25  11   36.61    6.47
   0  25  12   23.79    8.06
   0  25  12   26.52    5.94
   0 -25 -12   18.32    6.67
   0 -25 -12   44.82   14.96
   0 -25 -12   12.54    8.70
   0  25 -12   -3.85   17.67
   0 -25  12   21.03    4.69
   0  25 -13    7.34   18.79
   0 -25  13   35.66    5.16
   0 -25 -13   41.02   14.40
   0  25  13   27.90    5.91
   0 -25 -13   31.51    9.24
   0  25  13   40.28    8.61
   0 -25 -13   23.82    7.05
   0 -25 -14   -7.60   15.13
   0 -25 -14   15.19    9.02
   0  25  14   21.30   22.09
   0 -25  14    7.16    4.96
   0 -25 -14    3.32    7.04
   0  25 -14    8.35   19.20
   0  25  14    4.30    8.08
   0  25  14    4.60    5.59
   0  25  15   -0.50    5.60
   0  25 -15   25.30   21.31
   0  25  15    8.55    8.71
   0 -25 -15   -5.79   15.51
   0  25  15   17.06   22.41
   0 -25 -15   12.56    7.21
   0 -25 -15    0.21    9.47
   0  25  16   20.50    5.58
   0  25  16   17.68   21.89
   0  25 -16   11.23   22.03
   0 -25 -16   23.54    7.48
   0 -25 -16   30.29   15.37
   0  25  16   18.42    9.40
   0  25  17   95.39   11.22
   0 -25 -17   81.97   16.58
   0  25  17   88.06   22.42
   0 -25 -17  102.49    9.59
   0  25 -17   79.12   22.81
   0 -25 -18   53.61    8.16
   0 -25 -18   46.85   16.52
   0  25  18   72.17   21.67
   0  25  18   37.62   10.58
   0  25  19    6.81   10.20
   0 -25 -19   -5.58   15.90
   0  25  19   18.49   21.15
   0 -25 -20   -2.36   17.15
   0 -26   0   44.71   17.30
   0  26   0   36.58   22.47
   0  26   0   51.59   13.09
   0  26   1  120.13   14.15
   0  26  -1   87.49   22.59
   0  26  -1  101.59   14.59
   0  26   1  147.19   24.94
   0 -26   1   70.84   18.50
   0 -26  -1  133.78   18.51
   0 -26  -2   56.66   17.45
   0  26   2   47.34   23.19
   0  26  -2   41.33   13.45
   0  26  -2   43.56   21.90
   0 -26   2   58.54    6.45
   0  26   2   41.78   12.45
   0 -26   3    2.94    4.80
   0  26  -3  -29.87   20.61
   0  26  -3    8.82   14.03
   0  26   3   -4.08   23.05
   0  26   3  -17.45   11.33
   0 -26  -3    2.86   15.90
   0  26   4   31.96   23.08
   0  26   4   34.15    4.45
   0 -26   4   16.73    4.66
   0  26   4   30.58   12.34
   0 -26  -4   44.35   16.19
   0  26  -4   19.27   14.56
   0  26  -4   26.67   21.06
   0  26   5  195.88   11.04
   0  26   5  155.49   12.12
   0  26   5  147.53   25.42
   0 -26  -5  178.75   19.74
   0  26  -5  194.93   18.56
   0 -26   5  173.03   11.24
   0  26  -5  187.94   24.45
   0  26  -6   20.84   14.78
   0  26   6    6.68    6.55
   0  26   6   22.51    3.69
   0  26   6    4.16   21.79
   0 -26  -6   29.35   15.77
   0 -26   6   16.89    4.42
   0  26   7   15.14    7.09
   0 -26   7   17.02    4.41
   0  26   7   21.50   24.00
   0  26  -7   41.16   15.15
   0  26   7   11.09    3.35
   0 -26  -7   -7.70   15.68
   0  26   8   45.36   23.31
   0 -26  -8   26.32    9.21
   0 -26  -8   43.71   15.90
   0 -26   8   46.79    4.68
   0  26   8   28.17    3.29
   0 -26  -8   27.07    2.33
   0  26   8   25.92    6.99
   0  26  -9   19.81   16.64
   0 -26   9   -0.46    4.34
   0  26   9   17.73   22.86
   0  26   9    1.81    6.19
   0 -26  -9  -10.52    8.72
   0  26   9    1.62    7.33
   0 -26  -9   19.82   16.25
   0 -26 -10    6.60    7.63
   0 -26 -10   10.19   14.94
   0 -26  10    6.45    4.47
   0  26  10    0.31    7.54
   0  26 -10    3.00   18.00
   0 -26 -10    4.96    9.09
   0  26  10    2.85    6.28
   0  26  10    0.97   23.41
   0 -26 -11    6.44    7.12
   0 -26 -11   19.96   14.95
   0  26  11   -1.11    7.92
   0  26 -11  -20.67   18.51
   0  26  11    4.56    5.91
   0 -26 -11    6.38    9.00
   0 -26  11   -2.11    4.56
   0  26  12   39.89    8.54
   0  26  12   34.55    6.61
   0  26 -12    7.85   18.87
   0 -26  12   42.58    5.13
   0 -26 -12   34.87    7.10
   0 -26 -12   55.25   16.03
   0 -26 -12   34.08    9.67
   0  26  13   22.46    6.21
   0 -26 -13   15.73    9.29
   0 -26  13   12.02    4.78
   0  26 -13    4.06   19.56
   0 -26 -13    3.28   15.12
   0 -26 -13   16.74    7.53
   0  26  13    4.64    8.30
   0  26  14   -5.88    9.07
   0 -26  14   13.79    4.96
   0  26 -14   11.98   19.60
   0  26  14    3.11    5.78
   0 -26 -14    7.50   15.47
   0 -26 -14   -4.94    7.22
   0 -26 -14   -1.27    9.20
   0 -26 -15   24.63   10.22
   0 -26 -15    8.43    7.66
   0  26  15   30.21   23.60
   0 -26 -15   35.44   15.94
   0  26  15   21.05    9.41
   0  26  15   30.20    6.23
   0  26 -15    6.57   20.73
   0  26 -16  -19.69   22.28
   0  26  16   -4.85   22.36
   0 -26 -16    5.20   16.08
   0 -26 -16   19.78    7.94
   0  26  16    5.52    9.72
   0  26  16   -1.66    5.88
   0 -26 -17   34.57   16.23
   0 -26 -17   14.38    7.89
   0  26  17   15.41    9.81
   0  26 -17   -2.36   22.95
   0  26  17   -6.15   21.67
   0 -26 -18   62.51   18.24
   0  26  18   71.56   11.62
   0 -26 -19   -1.46   17.81
   0  27   0    9.98   12.91
   0  27   0   43.35   23.32
   0 -27   0   16.89   18.08
   0  27   1   25.74   24.43
   0  27  -1   49.34   14.21
   0  27  -1   43.13   22.99
   0 -27   1   31.67   19.06
   0  27   1   33.22   12.86
   0 -27  -1   20.36   18.07
   0  27   2    1.49   12.46
   0  27   2   23.03   24.48
   0  27  -2  -21.93   23.65
   0 -27  -2    7.45   17.77
   0  27  -2   40.16   13.96
   0  27  -3  -14.81   22.89
   0 -27   3  -11.54    5.95
   0  27  -3   21.17   14.23
   0  27   3   28.60   24.00
   0 -27  -3   13.23   17.76
   0  27   3   -4.72   12.18
   0  27  -4  207.55   27.51
   0 -27  -4  251.22   23.79
   0  27  -4  281.69   22.43
   0  27   4  262.75   16.10
   0 -27   4  288.27   16.27
   0  27   4  264.10   29.92
   0 -27   5    7.77    4.73
   0 -27  -5   14.22   16.36
   0  27  -5   14.17   21.79
   0  27  -5   20.04   15.04
   0  27   5    8.08    4.33
   0  27   5   29.03   23.30
   0  27   5    4.04    6.73
   0  27   6   -3.21   25.14
   0 -27  -6   -4.97   16.25
   0 -27   6    3.80    4.53
   0  27  -6  -14.85   21.49
   0  27   6   13.07    6.62
   0  27  -6    6.61   16.07
   0  27   6    4.54    3.84
   0  27   7  117.94   25.69
   0  27  -7  138.19   18.95
   0  27   7  107.01    9.79
   0 -27  -7  136.20   18.29
   0  27   7  112.51    7.49
   0 -27   7  121.69    8.09
   0  27   8   18.70    7.34
   0 -27   8   40.42    4.82
   0  27   8   20.89   23.57
   0 -27  -8   34.21    9.62
   0 -27  -8   38.31   16.46
   0  27   8   33.26    3.55
   0  27  -8   32.61   17.22
   0 -27  -9    7.04    2.21
   0 -27   9    3.45    4.49
   0  27  -9    7.68   17.99
   0 -27  -9   24.12   16.97
   0  27   9   -1.82    7.41
   0 -27  -9    1.78    9.59
   0  27   9   24.50   24.29
   0  27   9   14.94    6.55
   0  27  10   33.48    6.46
   0 -27 -10   27.94    9.96
   0  27  10   17.97   23.52
   0 -27  10   26.55    4.77
   0  27 -10   36.30   18.60
   0 -27 -10   18.02   17.02
   0  27  10   26.23    7.97
   0 -27 -10   21.18    7.67
   0 -27 -11   15.17    9.71
   0 -27  11   17.15    4.69
   0  27  11   12.75    8.05
   0  27  11   14.57    6.21
   0 -27 -11    5.05    7.33
   0 -27 -11   30.54   16.96
   0  27 -11    8.24   18.68
   0  27  12   42.38    8.94
   0 -27 -12   31.89   15.55
   0 -27 -12   48.63    9.82
   0  27 -12   39.67   19.94
   0 -27  12   41.28    5.40
   0 -27 -12   45.90    8.03
   0  27  12   42.49    6.73
   0 -27 -13   55.47   10.80
   0 -27 -13   59.93   16.88
   0  27  13   80.41   10.09
   0  27 -13   55.88   20.77
   0  27  13   68.18    7.46
   0 -27 -13   69.90    8.66
   0 -27  13   69.99    6.36
   0 -27 -14    4.42   15.73
   0 -27 -14   12.87   10.33
   0  27  14    3.28    6.16
   0  27  14    4.92    8.98
   0  27 -14  -10.65   20.23
   0 -27 -14    5.53    7.79
   0 -27 -15   -5.74    7.65
   0  27  15  -14.72   23.64
   0  27  15    2.66    9.61
   0 -27 -15    0.22   10.75
   0 -27 -15  -30.18   16.81
   0  27  15   -3.92    6.14
   0  27 -15    2.21   21.16
   0  27 -16   85.56   23.32
   0  27  16  106.73   12.08
   0 -27 -16  105.46   18.45
   0  27  16   81.64   25.03
   0 -27 -16   91.81   10.34
   0 -27 -17   29.68   17.33
   0  27  17   14.06   10.83
   0  27  18   17.69   11.17
   0 -27 -18   24.58   18.06
   0  28   0   69.37   25.12
   0 -28   0   31.12   18.41
   0  28   0   57.32   14.60
   0  28  -1    8.14   14.12
   0 -28   1  -10.98   19.25
   0 -28  -1    3.99   18.24
   0  28   1  -10.71   23.62
   0  28  -1  -19.54   24.30
   0  28   1   16.76   13.83
   0  28   2   30.05   13.31
   0  28  -2   24.04   23.57
   0  28  -2   27.17   15.33
   0  28   2   51.02   25.88
   0 -28  -2  -13.68   18.29
   0  28   3  112.00   15.57
   0  28  -3  119.13   17.29
   0  28   3  156.14   27.59
   0  28   3  129.03    8.97
   0 -28  -3  146.23   19.95
   0  28  -3   89.43   24.14
   0  28   4   -7.74   26.79
   0 -28  -4    6.78   18.17
   0  28   4    6.62    4.62
   0  28  -4   27.46   22.35
   0  28  -4   16.91   15.35
   0 -28   4   10.13    5.77
   0 -28   5   75.29    6.78
   0 -28  -5   63.88   19.53
   0  28  -5   86.26   23.73
   0  28   5   80.12    6.31
   0  28  -5   72.81   16.83
   0  28   5  122.22   25.85
   0 -28  -6   21.63   17.71
   0  28  -6   10.02   23.36
   0 -28   6   20.30    4.87
   0  28   6   17.09    4.21
   0  28   6   -5.50   24.87
   0  28  -6   22.31   16.31
   0  28   6   16.53    7.16
   0  28   7   39.47    8.16
   0  28  -7   83.66   17.26
   0  28   7   42.58    4.37
   0  28   7   64.38   24.31
   0 -28  -7   22.33   17.07
   0 -28   7   35.00    5.12
   0  28   8    7.50   25.25
   0 -28  -8   14.53    9.75
   0  28  -8  -13.05   17.58
   0  28   8   16.90    7.47
   0 -28   8   21.34    4.63
   0  28   8   20.57    3.36
   0 -28  -8   12.98   17.65
   0  28   8    3.03    7.10
   0  28  -9   12.54   18.03
   0 -28   9   22.97    4.75
   0 -28  -9   -2.76   16.86
   0 -28  -9    6.23    9.38
   0  28   9   12.68   23.57
   0  28   9    8.62    6.69
   0  28   9   15.50    7.40
   0 -28  10    2.04    4.57
   0 -28 -10   -5.69    7.40
   0 -28 -10   -4.39   10.10
   0  28 -10   18.68   19.20
   0 -28 -10  -25.22   17.75
   0  28  10   -8.92    8.64
   0  28 -10   -1.99    1.82
   0  28  10   -6.01    6.78
   0 -28 -11   10.27   10.36
   0  28  11   -0.58    6.44
   0  28 -11  -16.85   18.94
   0 -28 -11    8.95    8.11
   0 -28 -11    3.23   16.92
   0  28  11   -0.67    8.60
   0  28  11   13.38   25.78
   0 -28  11   -0.75    4.58
   0  28  12    4.71    6.49
   0  28  12   -9.61    9.16
   0 -28 -12  -10.58   10.22
   0 -28 -12   -7.08    7.83
   0 -28 -12   22.38   17.29
   0  28 -12   -4.68   20.10
   0  28  13   14.99    9.33
   0  28 -13   20.88   20.69
   0 -28 -13   27.49   10.36
   0 -28 -13   34.08    8.25
   0  28  13   28.30    6.97
   0 -28 -13   28.20   17.28
   0  28  14  -10.05    6.83
   0  28  14   -8.05    9.46
   0 -28 -14    0.22   10.57
   0 -28 -14   16.56   16.76
   0 -28 -14   14.36    8.02
   0  28  15   94.00   11.89
   0  28 -15   65.77   22.64
   0 -28 -15  106.80    9.91
   0 -28 -15   61.55   18.72
   0  28  15   81.37    8.53
   0 -28 -15  101.70   12.06
   0  28  15   69.14   26.15
   0 -28 -16   36.48   11.42
   0  28  16   36.99   10.80
   0 -28 -16   34.85   18.02
   0  28  17    8.16   10.87
   0 -28 -17    2.10   17.44
   0  29   0   19.54   14.04
   0  29   0    4.39   25.16
   0 -29   0  -15.46   19.76
   0  29   1   31.19   26.68
   0  29   1   10.27   14.09
   0  29  -1   26.89   15.62
   0  29  -1   55.85   25.36
   0 -29  -1  -21.48   19.15
   0 -29  -2  122.57   22.15
   0  29   2  123.78   27.00
   0  29   2   79.35   15.66
   0  29  -2  109.87   25.83
   0  29  -2  122.63   17.60
   0 -29  -3   46.02   19.11
   0  29   3    5.69   26.08
   0  29  -3   30.65   15.09
   0  29   3   40.66   14.05
   0  29   3   38.35    5.98
   0  29   4   48.11    5.82
   0  29  -4   46.72   16.07
   0 -29  -4   32.37   19.61
   0  29   4   38.86   27.62
   0  29  -4   54.71   24.60
   0  29   5  105.45   27.02
   0  29  -5   60.14   24.23
   0 -29  -5   68.29   18.93
   0  29  -5   48.85   16.48
   0 -29   5   78.17    7.09
   0  29   5   57.47    5.95
   0  29   6   27.75    4.61
   0  29  -6   27.71   24.04
   0  29   6   33.91   26.33
   0  29  -6   23.99   17.05
   0 -29   6   24.14    5.50
   0 -29  -6   56.25   18.69
   0  29   6   31.85    7.50
   0  29   7    7.40    3.87
   0  29   7    1.48    6.87
   0  29   7  -16.81   26.42
   0  29  -7   30.06   23.68
   0 -29   7    2.53    4.86
   0 -29  -7   -6.04   17.77
   0  29  -7  -13.79   17.31
   0  29   8   38.55    7.86
   0  29  -8   16.00   18.00
   0 -29   8   53.22    5.44
   0 -29  -8   38.09   10.85
   0  29   8   51.01   26.36
   0  29   8   37.80    8.41
   0  29   8   40.30    4.15
   0 -29  -8   36.75   17.42
   0  29   9   46.65    7.92
   0  29   9   37.21    8.25
   0 -29   9   42.74    5.30
   0 -29  -9   35.11   10.31
   0  29  -9   20.47   18.15
   0 -29  -9   61.87   18.15
   0  29  10  -14.95   25.35
   0 -29 -10    9.65    7.83
   0  29  10   19.51    8.11
   0 -29 -10   18.88   10.39
   0 -29  10    5.97    4.65
   0 -29 -10  -16.03   18.69
   0  29 -10   -8.80   19.20
   0  29  10    7.14    7.20
   0  29 -11   26.22   19.76
   0  29  11    4.12    6.65
   0  29  11   46.51   27.03
   0 -29 -11   30.16    8.60
   0  29  11   -5.87    8.75
   0 -29 -11   25.75   19.11
   0 -29 -11   19.80   10.41
   0 -29 -12    6.84    8.28
   0 -29 -12    4.41   10.25
   0  29 -12   19.11   21.02
   0  29  12    5.26    6.90
   0 -29 -12    5.06   17.78
   0  29  12    8.77    9.12
   0  29  13    6.49    6.96
   0 -29 -13   14.74   10.54
   0 -29 -13    6.12   18.30
   0  29 -13   -8.43   20.72
   0  29  13    5.01    9.27
   0 -29 -13   -9.31    8.54
   0  29 -14   34.14   22.18
   0  29  14   37.71    7.17
   0 -29 -14   30.03    8.61
   0 -29 -14   37.63   10.61
   0  29  14   43.93   10.70
   0 -29 -14   31.37   18.30
   0 -29 -15   14.30   11.15
   0 -29 -15    5.99   17.87
   0  29  15   12.33   10.41
   0  29  16   -2.47   10.75
   0 -29 -16   -5.75   11.84
   0 -29 -16   31.54   19.28
   0  30   0   39.84   26.74
   0  30   0   51.77   15.86
   0 -30   0   47.43   21.69
   0  30  -1   23.03   15.23
   0 -30  -1  -11.53   20.37
   0  30   1   20.75   26.36
   0  30  -1   48.06   26.39
   0  30   1   30.91   14.82
   0 -30  -2    6.38   20.76
   0  30  -2    2.34   16.11
   0  30   2  -16.31   26.86
   0  30   2   -1.75    5.42
   0  30   2   25.48   14.59
   0  30  -2    3.28   25.21
   0 -30  -3  188.99   23.69
   0  30   3  190.31   17.65
   0  30  -3  147.55   19.48
   0  30   3  160.74   10.87
   0  30   3  144.46   30.31
   0  30   4    9.93    5.29
   0  30   4   37.73   27.67
   0 -30  -4   29.33   19.73
   0  30  -4   -5.99   16.24
   0  30  -4   30.20   25.13
   0  30  -5  -11.56   17.10
   0  30   5    2.55    4.88
   0 -30  -5   -7.33   19.98
   0  30  -5    9.20   24.44
   0  30   5   36.66   28.11
   0 -30  -6   41.07   19.90
   0  30   6   64.31   27.85
   0  30  -6   22.84   18.04
   0 -30   6   51.77    6.86
   0  30   6   55.20    5.47
   0  30  -6   23.96   25.36
   0  30  -7   -0.98   25.22
   0  30   7    4.06    7.52
   0  30  -7    1.13   17.31
   0  30   7   -4.29    7.72
   0 -30   7    0.73    5.27
   0 -30  -7   -5.73   19.83
   0  30   7    6.89   27.42
   0 -30  -8   -9.36   18.62
   0  30  -8   14.00   18.28
   0  30   8    1.43    7.85
   0 -30  -8    7.88   11.05
   0 -30   8   -0.87    5.06
   0  30   8   13.62   27.53
   0  30   8    0.28    7.87
   0  30  -8   -2.90   24.49
   0 -30  -9    6.76   18.41
   0  30   9   16.75    7.96
   0  30  -9   23.01   18.92
   0 -30  -9   -3.95   10.58
   0  30   9   -6.91    8.30
   0  30   9   15.63   25.69
   0  30  10   25.11   27.96
   0 -30 -10   17.01   10.29
   0 -30 -10   13.28   19.35
   0  30  10   20.87    8.07
   0  30 -10   26.59   19.01
   0  30  10   11.78    8.75
   0 -30 -10    3.21    8.62
   0 -30 -11   32.34   11.27
   0  30 -11   27.76   20.01
   0  30  11   36.19    7.44
   0 -30 -11   32.19   18.43
   0  30  11   32.75   27.66
   0 -30 -11   23.24    8.88
   0  30  11   19.70    9.20
   0 -30 -12   15.39    8.65
   0  30 -12    4.13   21.26
   0  30  12    3.30    9.37
   0 -30 -12   15.51   19.50
   0  30  12   19.09    7.15
   0 -30 -12   28.49   11.12
   0 -30 -13   -5.76    8.77
   0  30  13   22.85    7.62
   0  30 -13   27.94   22.62
   0  30  13    6.66    9.64
   0 -30 -13   11.15   19.38
   0 -30 -13   12.81   11.16
   0 -30 -14  -11.62   20.97
   0 -30 -14    9.73   11.36
   0  30  14  -13.88    7.20
   0  30  14   -2.55   10.39
   0  31   0   29.52   28.34
   0 -31   0   -0.76   22.08
   0  31   0   -3.14   15.68
   0  31   1   22.65   28.59
   0  31  -1    1.86   16.83
   0  31  -1   -2.33   29.20
   0 -31  -1    5.24   21.73
   0  31   1   37.42   15.25
   0 -31  -2   22.86   21.90
   0  31   2    6.02   28.79
   0  31   2   25.10    6.23
   0  31   2   27.16   15.42
   0  31  -2   22.83   26.66
   0  31  -2   47.10   16.65
   0  31   3   19.62   14.93
   0 -31  -3   13.82   22.81
   0  31   3    0.34    5.82
   0  31  -3   -3.98   16.74
   0  31   3   29.06   28.00
   0  31  -3    2.23   26.55
   0  31   4   82.58   30.18
   0  31   4   73.91    7.00
   0  31  -4   44.91   26.69
   0  31  -4   56.48   17.99
   0 -31  -4   90.61   23.00
   0  31  -5   11.76   26.24
   0  31  -5   17.63   17.91
   0 -31  -5   62.05   20.92
   0  31   5   49.70   28.73
   0 -31  -6   62.08   21.19
   0  31   6   64.75   28.45
   0  31  -6   16.19   18.36
   0  31  -6   29.26   25.76
   0  31  -7  -14.37   25.61
   0  31   7    1.18   28.76
   0 -31  -7  -30.07   21.14
   0  31   7   -6.55    8.09
   0  31  -7  -17.79   18.43
   0  31   8   29.53    7.86
   0 -31  -8   42.68   20.25
   0  31  -8   27.84   18.76
   0  31  -8   17.13   26.40
   0  31   8  -13.92   28.72
   0 -31  -8   44.49   11.25
   0  31   8   46.77    8.71
   0 -31  -9    3.82   10.88
   0  31   9   -5.05    8.51
   0  31   9    6.11    7.97
   0  31   9   -9.12   28.56
   0  31  -9   27.87   26.10
   0 -31  -9   13.53   19.78
   0  31  -9   30.01   18.80
   0  31  10    9.06    7.71
   0  31  10   -5.07    9.13
   0 -31 -10   -9.58   20.36
   0  31  10  -18.03   28.11
   0 -31 -10   -6.11   11.21
   0 -31 -10  -10.30    9.23
   0  31 -10   26.94   20.56
   0  31 -10   -5.92   26.44
   0 -31 -11   67.81   21.58
   0 -31 -11   65.40   12.51
   0  31 -11   18.75   21.49
   0 -31 -11   57.81   10.07
   0  31  11   39.55    9.83
   0  31  11   40.84    8.31
   0 -31 -12   -4.93   10.83
   0 -31 -12   14.90   20.08
   0  31  12   20.99    7.56
   0 -31 -12   13.22    9.15
   0  31  12   -5.60    9.74
   0 -31 -13   16.10   11.98
   0  31  13    2.43    7.52
   0 -31 -13   16.16   20.40
   0  31  13   14.38   10.63
   0  32   0   42.73   28.79
   0  32   0   23.49   16.10
   0  32   1   45.20   16.09
   0  32  -1   33.86   16.50
   0  32   1   42.36    7.00
   0 -32  -1   63.55   23.64
   0  32   1   87.45   29.72
   0  32  -1   78.45   29.40
   0  32  -2   55.07   17.32
   0  32   2   25.40    6.21
   0  32   2   14.03   16.14
   0  32  -2   17.83   28.55
   0  32   2    9.95   29.21
   0 -32  -2   18.41   22.84
   0  32   3  -11.24   29.01
   0  32  -3    1.16   28.39
   0  32  -3   -5.08   17.06
   0  32   3   -3.79    5.64
   0 -32  -3   -1.51   22.82
   0  32  -4  -18.33   27.70
   0  32   4   72.56   31.22
   0  32  -4   17.35   17.87
   0 -32  -4   13.40   22.27
   0  32   5   65.80   29.93
   0  32  -5   56.98   27.95
   0 -32  -5   48.42   22.35
   0  32  -5   38.86   18.19
   0 -32  -6  -12.18   21.80
   0  32   6   27.03   29.18
   0  32  -6   33.92   18.77
   0  32  -6   30.73   27.72
   0  32   6   14.12    8.57
   0  32   7   13.23   29.20
   0  32   7   -3.30    8.63
   0  32  -7   10.73   27.70
   0  32  -7   -9.39   19.29
   0 -32  -7  -23.17   22.20
   0  32  -8    3.63   19.88
   0 -32  -8   -0.27   11.70
   0 -32  -8  -11.76   22.07
   0  32  -8    8.43   27.95
   0  32   8   20.14   29.71
   0  32   8   12.85    8.32
   0  32  -9   10.61   19.77
   0  32   9   -1.87    8.66
   0  32  -9   -2.08   26.21
   0 -32  -9   -4.06   21.50
   0  32   9   -4.50    8.96
   0 -32  -9   -6.30   11.28
   0  32 -10   30.33   20.43
   0  32  10   15.55    9.40
   0 -32 -10   13.38   12.23
   0 -32 -10   34.10   21.65
   0  32  10   27.08    7.94
   0 -32 -10   30.76    9.70
   0  32 -10   23.60   27.05
   0  32  11    8.17    9.71
   0 -32 -11    3.86   12.18
   0  32 -11  -13.21   29.14
   0  32  11   19.12    8.43
   0 -32 -11   -4.63   21.95
   0  33   0    6.30   30.23
   0  33   0  -12.31   17.67
   0  33   1  100.34   31.23
   0  33   1   78.65   17.66
   0  33  -1   46.40   18.25
   0 -33  -1   84.21   25.60
   0  33   1   42.12    7.39
   0  33  -1   33.71   30.64
   0  33  -2   23.43   29.78
   0  33   2   57.48   32.61
   0  33  -2   23.67   17.92
   0  33   2   -4.52   16.73
   0 -33  -2  -17.46   24.32
   0 -33  -3   14.14   23.57
   0  33   3   10.24   29.88
   0  33  -3    6.75   17.58
   0  33  -3  -35.16   29.54
   0  33  -4   14.51   18.64
   0  33   4   32.16   30.88
   0 -33  -4   45.78   24.35
   0  33  -4  -14.31   29.46
   0  33   5   -5.00    9.01
   0  33  -5   12.18   18.64
   0  33   5  -26.68   29.94
   0 -33  -5  -12.98   23.49
   0  33  -5   -2.34   29.40
   0  33   6   -5.73    8.84
   0  33  -6  -18.29   19.11
   0  33  -6   -5.72   28.86
   0 -33  -6   -8.23   24.12
   0 -33  -7   69.19   23.06
   0  33  -7   51.86   19.71
   0  33   7   31.44    9.31
   0  33  -8    7.70   29.22
   0  33   8   -9.76    8.76
   0 -33  -8    5.77   23.53
   0  33  -8   -5.55   20.32
   0 -33  -8    2.77   12.20
   0 -33  -9   13.52   23.13
   0 -33  -9   14.88   12.64
   0  33   9   12.10    8.88
   0  33  -9   -2.16   29.26
   0  34   0   14.29   32.50
   0  34   0   23.28   17.68
   0  34  -1    7.72   31.42
   0  34   1   -5.20   17.21
   0  34  -1  -14.47   18.33
   0  34   1   24.87   32.05
   0  34   2   11.62   17.38
   0 -34  -2   15.60   24.29
   0  34   2   64.39   31.68
   0  34  -2   11.35   18.31
   0  34  -2   19.13   31.47
   0  34  -3   39.78   19.46
   0 -34  -3   30.11   25.03
   0  34  -3  -11.33   32.17
   0  34  -4   16.13   30.71
   0  34   4   28.10    9.37
   0 -34  -4    6.43   24.93
   0  34  -4   -2.19   19.86
   0  34  -5  -30.43   31.40
   0  34  -5   23.24   20.34
   0 -34  -5   12.72   24.18
   0  34   5   -5.01    9.66
   0  34  -6   11.96   29.78
   0  34  -6   18.57   19.79
   0 -34  -6   15.68   24.08
   0  34   6   20.78    9.58
  -1   0  29   -5.22   13.50
   1   0 -29    2.29   22.53
  -1   0  29    1.80   11.08
  -1   0  28  -17.06   12.02
  -1   0  28   16.64   10.60
   1   0 -28   -6.29   20.67
  -1   0  27   -1.42    9.73
   1   0 -27  -10.47   19.29
   1   0 -26   86.03   19.43
  -1   0  26  110.35   11.65
   1   0 -25   -3.91   17.06
  -1   0  25   -5.68    8.92
  -1   0  24  130.76   11.70
   1   0 -24  157.29   17.62
   1   0 -23   21.65   14.40
  -1   0  23   23.61    8.47
   1   0 -22   84.39   14.67
  -1   0  22  104.56    9.75
   1   0 -21   -1.09    1.86
  -1   0  21    3.43    6.73
  -1   0  20   92.77    7.93
   1   0 -20   87.09   11.96
   1   0 -20   77.10    4.82
   1   0 -19    3.90    9.76
  -1   0  19   -1.35    6.09
   1   0 -19    0.27    1.84
  -1   0  18  955.78   48.88
   1   0 -18  839.53   48.17
   1   0 -18  884.16   49.92
  -1   0  17   -9.52    4.93
   1   0 -17    1.63    8.02
   1   0 -16  365.89   23.33
  -1   0  16  384.39   22.11
   1   0 -15    0.68    6.66
  -1   0  15   -2.13    4.29
  -1   0  14  124.06    7.88
   1   0 -14   98.97    9.12
   1   0 -13   -4.06    5.36
  -1   0  13   -2.26    3.47
  -1   0  12 1029.27   58.02
   1   0 -12 1020.85   58.43
  -1   0  11   -3.73    2.85
   1   0 -11   -8.94    4.02
   1   0 -10 6192.00  349.03
  -1   0  10 6217.43  348.78
  -1   0   9   -3.36    2.45
   1   0  -9   -5.51    3.20
   1   0  -8  408.33   23.48
   1   0  -7   -1.79    2.58
   1   0  -6  349.60   20.02
   1   0  -4   28.66    2.02
   1   0   4  614.06   36.88
  -1   0  -4  702.98   36.98
  -1   0  -4  657.09   36.77
  -1   0  -5    1.99    0.65
   1   0   5    4.15    1.77
  -1   0  -5    2.95    2.44
  -1   0  -6   68.72    3.96
  -1   0  -6   65.52    4.93
  -1   0  -7    1.40    2.83
  -1   0  -7   -0.53    0.80
  -1   0  -8  727.65   37.71
  -1   0  -8  653.78   37.22
  -1   0  -9    1.80    0.98
  -1   0  -9   -0.88    3.89
  -1   0 -10 2240.19  126.37
  -1   0 -10 2332.24  126.90
   1   0  11   -0.68    2.94
  -1   0 -11   -0.93    1.16
  -1   0 -11   -4.65    4.67
  -1   0 -12  713.89   40.28
   1   0  12  732.58   39.67
  -1   0 -12  690.23   39.34
   1   0  13    2.29    3.27
  -1   0 -13   -0.59    1.27
   1   0  14  114.87    7.43
  -1   0 -14  122.76    9.40
  -1   0 -14  105.20    6.26
  -1   0 -15    0.75    7.20
  -1   0 -15    2.28    1.50
   1   0  15    2.01    3.83
   1   0  16  412.66   23.47
  -1   0 -16  377.74   24.94
  -1   0 -17   -3.05    8.31
   1   0  17   -9.14    4.64
   1   0  18   77.50    7.12
  -1   0 -18   70.78   11.01
  -1   0 -19    7.36   10.75
   1   0  19  -12.06    5.93
   1   0  20   38.95    6.65
  -1   0 -20   65.90   12.95
   1   0  21    5.25    7.02
  -1   0 -21   12.56   13.05
   1   0  22   90.91    9.25
  -1   0 -22   88.30   15.28
  -1   0 -23    2.62   15.42
   1   0  23   -5.46    7.43
  -1   0 -24    3.97   16.44
   1   0  24   37.49    8.38
   1   0  25    5.77    8.49
  -1   0 -25   -1.23   17.08
  -1   0 -26  108.20   21.92
   1   0  26  162.49   12.80
   1   0  27    4.42    9.77
  -1   0 -27  -19.94   20.11
   1   0  28    4.24   10.29
  -1   0 -28  -21.78   21.19
   1   0  29   -1.49   11.08
  -1   0 -29   -6.18   22.34
   1   1 -29    9.98   21.72
   1  -1 -29   -4.00   23.22
  -1  -1  29   30.05   13.31
  -1   1  29   28.05   13.05
  -1   1  29   16.80   11.14
  -1  -1  29    0.67   11.08
  -1  -1  28   62.17   10.96
  -1   1  28   30.25   12.61
   1  -1 -28   31.90   22.20
   1   1 -28   53.29   20.82
  -1   1  28   33.61   11.12
  -1  -1  28   60.93   12.03
  -1   1  27   89.04   12.03
  -1   1  27   60.77   10.67
   1   1 -27   21.74   19.62
  -1  -1  27   68.97   11.10
   1  -1 -27   43.98   20.93
   1   1 -26    9.34   16.81
  -1   1  26   31.13    9.40
   1  -1 -26   16.92   19.33
  -1  -1  26    4.07    9.77
  -1  -1  25    5.93    8.90
   1   1 -25   25.51   16.36
  -1   1  25   16.18    8.77
   1  -1 -25   20.34   17.76
  -1   1  24    0.17    8.43
  -1  -1  24   17.29    8.55
   1   1 -24   29.75   14.29
   1  -1 -24    7.77   15.67
   1   1 -23  488.71   31.66
  -1  -1  23  565.37   28.94
  -1   1  23  517.63   28.79
   1   1 -23  469.96   27.35
   1  -1 -23  560.50   32.95
   1   1 -22  506.55   28.90
  -1  -1  22  531.73   30.25
   1   1 -22  533.86   32.69
   1  -1 -22  564.72   33.62
  -1   1  22  507.47   30.09
   1  -1 -21   20.12   12.65
  -1  -1  21   15.66    7.04
   1   1 -21   17.31   11.01
   1   1 -21    7.86    2.28
  -1   1  21   17.14    6.99
   1   1 -20   19.56   10.15
   1   1 -20   10.71    2.33
   1  -1 -20   12.24   11.64
  -1   1  20   13.41    6.52
  -1  -1  20    9.62    6.63
  -1   1  19  278.51   14.99
   1   1 -19  271.83   17.07
  -1  -1  19  270.75   14.87
   1  -1 -19  230.03   13.26
   1   1 -19  228.49   13.43
   1  -1 -19  247.95   17.76
  -1   1  18    6.44    5.33
   1   1 -18   -5.45    8.60
  -1  -1  18    5.15    5.31
   1  -1 -18    2.63    9.58
   1  -1 -18    6.22    1.50
   1  -1 -17    8.92    1.57
   1  -1 -17   15.08    8.55
  -1  -1  17   13.04    4.95
   1   1 -17    7.68    7.48
  -1   1  17   12.48    4.84
   1   1 -16   75.58    8.70
   1  -1 -16   95.71    9.93
  -1   1  16   90.27    6.64
  -1  -1  16   80.72    6.96
   1   1 -15  563.73   33.09
  -1   1  15  581.43   32.36
  -1  -1  15  539.20   32.35
   1  -1 -15  595.19   33.48
   1  -1 -14   -0.23    6.40
  -1  -1  14    3.27    3.90
   1   1 -14   13.93    5.61
  -1   1  14   16.94    3.85
  -1   1  13   58.35    4.88
   1   1 -13   65.82    6.37
   1  -1 -13   57.21    7.13
  -1  -1  13   50.42    4.87
   1   1 -12   83.08    7.16
  -1  -1  12   96.63    6.38
   1  -1 -12   86.29    7.68
  -1   1  12   96.19    6.38
   1   1 -11   38.55    4.97
  -1   1  11   40.29    3.81
  -1  -1  11   33.06    3.81
   1  -1 -11   39.71    5.69
  -1   1  10  431.77   23.17
   1   1 -10  446.64   23.55
   1  -1 -10  434.42   23.79
  -1   1   9  640.36   36.50
   1  -1  -9  655.83   36.93
  -1   1   8  655.19   38.14
   1  -1  -8  727.41   38.53
   1  -1  -7  260.62   15.73
   1  -1  -7  270.88   15.32
   1  -1  -6   16.64    1.96
   1  -1  -6   12.25    3.10
   1  -1  -5 2706.10  151.20
   1  -1  -5 2656.43  151.38
   1  -1  -4  116.27    6.98
   1  -1  -4  113.71    6.60
  -1  -1  -3  177.33   10.64
  -1  -1  -4  187.23   10.78
  -1   1  -4  185.85   10.07
  -1   1  -4  170.89    9.94
   1   1   5  808.95   44.68
  -1  -1  -5  743.65   44.89
  -1   1  -5  824.67   44.54
  -1   1  -5  780.00   44.41
   1   1   6  991.86   53.15
  -1   1  -6 1056.90   53.08
  -1  -1  -6  909.79   53.39
  -1   1  -6  902.48   52.89
   1   1   7   22.55    3.14
  -1  -1  -7   23.23    3.70
  -1   1  -7   19.31    1.53
   1   1   7   20.67    2.05
  -1   1  -7   20.49    2.65
   1   1   8 1435.61   79.66
  -1  -1  -8 1455.03   80.10
  -1   1  -8 1395.45   79.54
   1   1   8 1422.23   79.83
  -1   1  -8 1438.10   79.82
   1   1   9  230.27   13.17
  -1   1  -9  243.69   13.24
  -1   1  -9  207.86   12.60
   1   1   9  237.86   12.82
  -1  -1  -9  252.02   13.91
   1   1  10  251.30   13.64
  -1   1 -10  228.74   13.36
  -1  -1 -10  249.24   14.78
  -1   1 -10  235.38   14.20
  -1   1 -11   76.22    4.71
   1   1  11   85.56    5.52
  -1   1 -11   80.78    6.32
  -1  -1 -11   84.15    7.56
  -1   1 -12   72.31    4.46
  -1  -1 -12   89.48    7.84
  -1   1 -12   66.94    6.68
   1   1  12   78.23    5.46
  -1   1 -13  265.86   16.07
  -1  -1 -13  286.81   16.85
  -1   1 -13  255.19   14.74
   1   1  13  264.74   15.27
  -1  -1 -14  118.45   10.08
   1  -1  14  119.48    7.87
  -1   1 -14  116.07    6.83
   1   1  14  117.32    7.77
  -1   1 -14  113.69    9.35
  -1   1 -15  223.64   13.29
   1   1  15  243.08   13.99
   1  -1  15  263.29   14.13
  -1  -1 -15  237.83   16.16
  -1   1 -15  233.41   15.33
  -1   1 -16   62.71    4.15
   1  -1  16   78.51    6.02
  -1  -1 -16   69.77    9.97
   1   1  16   64.26    5.68
  -1   1 -16   51.86    8.35
   1   1  17    6.13    4.52
  -1   1 -17    4.58    1.90
   1  -1  17    8.01    5.22
  -1   1 -17    9.72    7.53
  -1  -1 -17    8.77    9.64
  -1   1 -18  122.82   12.22
  -1  -1 -18  132.23   13.07
   1  -1  18  122.35    9.08
   1   1  18  132.21    8.90
  -1   1 -18  125.06    7.43
   1   1  19   11.77    5.54
  -1   1 -19    1.98    9.51
  -1  -1 -19    1.26   11.33
   1  -1  19   17.38    5.96
  -1  -1 -20   49.54   13.18
  -1   1 -20   49.31   11.60
   1  -1  20   39.55    6.90
   1   1  20   47.11    6.98
  -1  -1 -21  406.54   29.07
   1   1  21  422.85   25.15
  -1   1 -21  434.11   27.80
   1  -1  21  419.21   25.11
  -1  -1 -22  275.69   24.25
  -1   1 -22  282.93   22.65
   1   1  22  306.17   18.80
   1  -1  22  301.91   18.71
   1  -1  23  129.88   10.60
  -1  -1 -23  107.28   18.52
   1   1  23  106.00   10.36
  -1   1 -23  105.26   16.31
   1  -1  24   -2.58    8.00
   1   1  24   14.99    7.83
  -1   1 -24  -15.07   15.62
  -1  -1 -24   30.13   17.48
   1   1  25    1.73    8.44
  -1   1 -25   -9.68   16.28
   1  -1  25   -1.61    8.88
  -1  -1 -25   -6.47   18.41
  -1   1 -26    6.22   18.64
   1  -1  26   35.89    9.74
  -1  -1 -26    8.20   19.71
   1   1  26   31.73    9.27
  -1  -1 -27  116.83   22.36
   1  -1  27  124.54   12.30
   1   1  27  135.75   12.25
  -1   1 -27   85.64   21.44
   1   1  28   12.88   10.01
  -1  -1 -28   33.97   21.52
   1  -1  28   21.17   10.61
  -1   1 -28   35.39   20.46
   1  -1  29    1.49   10.79
  -1   1 -29    5.15   22.41
   1   1  29    9.52   11.51
  -1  -1 -29   28.48   23.63
   1  -2 -29    3.34   23.41
   1   2 -29   -4.70   20.43
  -1  -2  29    7.19   11.12
  -1   2  29    5.45   11.23
  -1   2  29   -3.27   12.23
  -1  -2  29  -10.77   12.45
  -1   2  28  -12.40   13.33
  -1  -2  28   -9.42   10.75
   1  -2 -28    3.97   23.12
  -1   2  28    9.01   10.45
  -1   2  28    7.03   12.64
   1   2 -28    1.85   18.81
  -1   2  27   78.84   11.88
  -1  -2  27  107.43   11.91
  -1   2  27  148.97   14.12
  -1   2  27  117.63   13.23
   1  -2 -27   84.49   22.25
   1   2 -27  104.16   19.64
  -1   2  26   74.39   11.63
   1   2 -26   62.26   17.07
   1  -2 -26   53.65   20.89
  -1   2  26   52.28    9.76
  -1  -2  26   52.52   10.36
   1   2 -25    3.77   14.83
   1  -2 -25  -14.25   18.57
  -1  -2  25   13.29    9.03
  -1   2  25    4.61    8.99
   1  -2 -24   13.87   16.77
  -1   2  24   12.37    8.07
   1   2 -24   22.44   13.42
   1   2 -24   12.90    2.81
  -1  -2  24    4.15    8.74
  -1   2  23  727.77   38.96
  -1  -2  23  779.50   39.10
   1  -2 -23  732.81   42.95
   1   2 -23  687.64   40.91
   1   2 -23  640.98   37.75
  -1   2  22  112.24    9.60
   1   2 -22  100.31   13.40
   1   2 -22   96.35    6.35
   1  -2 -22  135.54   16.81
  -1  -2  22  101.24    9.48
   1   2 -21  102.61   12.11
  -1   2  21  121.81    9.33
  -1  -2  21  107.56    9.19
   1   2 -21   98.36    6.46
   1  -2 -21  109.88   15.14
  -1  -2  20  114.08    9.27
   1   2 -20  105.56   11.84
  -1   2  20  133.30    8.86
   1  -2 -20  114.42   13.95
   1   2 -20   97.91    6.61
   1   2 -19   72.13   10.08
  -1  -2  19   59.00    7.25
  -1   2  19   62.97    7.28
   1  -2 -19   60.44   12.14
  -1  -2  18    7.00    5.60
  -1   2  18    2.70    5.26
   1  -2 -18    2.59   10.19
   1   2 -18    5.50    7.89
  -1  -2  17   44.55    5.88
   1   2 -17   60.28    8.20
   1  -2 -17   58.74   10.34
  -1   2  17   55.86    5.89
  -1  -2  16    6.32    4.34
   1  -2 -16    9.31    8.22
   1   2 -16    7.02    6.30
  -1   2  16    8.65    4.49
  -1  -2  15  230.75   12.44
   1  -2 -15  198.27   11.47
   1  -2 -15  199.38   14.32
  -1   2  15  232.37   12.49
   1   2 -15  223.99   13.38
  -1   2  14   23.89    3.81
   1  -2 -14   20.10    7.11
   1   2 -14   20.90    5.27
  -1  -2  14   24.57    4.21
   1  -2 -13   75.05    7.79
   1   2 -13   60.20    6.26
  -1  -2  13   69.17    5.69
  -1   2  13   78.64    5.70
  -1  -2  12  541.86   32.40
  -1   2  12  601.30   32.38
   1   2 -12  562.91   32.67
   1  -2 -12  560.22   33.24
  -1   2  11  673.94   37.08
   1  -2 -11  648.37   37.72
  -1  -2  11  634.52   37.08
  -1   2  10  879.61   49.95
   1  -2 -10  898.21   50.50
  -1   2   9  422.94   24.40
   1  -2  -9  429.84   24.36
   1  -2  -9  443.47   25.00
   1  -2  -8   14.79    4.56
  -1   2   8   10.03    3.04
  -1   2   8   13.66    2.23
   1  -2  -8   10.90    2.14
   1  -2  -7   19.03    3.89
   1  -2  -7    3.45    1.82
   1  -2  -6  209.01   12.13
   1  -2  -6  196.97   11.48
   1  -2  -5 1759.70  100.60
   1  -2  -5 1793.20  100.33
   1  -2  -4  185.40   11.60
   1  -2  -4  212.92   11.15
  -1   2   4  179.41   11.16
   1  -2  -3  121.60    6.53
   1  -2  -3  108.54    5.99
   1  -2  -3   85.53    6.02
  -1   2   3  112.81    6.01
  -1  -2  -3 1306.36   73.92
  -1  -2  -4  386.24   22.02
   1   2   4  372.72   21.08
   1   2   5 2180.19  122.13
   1   2   5 2181.51  122.48
  -1  -2  -5 2119.00  122.72
   1   2   6  463.41   25.26
   1   2   6  435.55   24.84
  -1  -2  -6  422.74   25.76
  -1  -2  -7  142.79   10.55
   1   2   7  142.77    9.40
   1   2   7  156.01    8.80
  -1   2  -8   17.15    2.53
   1   2   8   12.55    1.96
   1   2   8   12.75    3.55
  -1  -2  -8   10.68    5.34
  -1  -2  -9 1014.15   54.53
   1   2   9  947.08   53.65
   1   2   9  989.57   53.96
  -1   2  -9  912.13   53.80
   1   2  10   45.59    4.79
   1   2  10   54.52    3.71
  -1   2 -10   43.25    3.09
  -1  -2 -10   45.36    6.61
  -1   2 -10   46.27    4.25
   1   2  11  246.21   13.66
   1   2  11  272.40   14.26
  -1  -2 -11  252.06   15.63
  -1   2 -11  259.16   14.11
  -1   2 -11  216.29   13.42
   1   2  12  606.50   31.75
  -1  -2 -12  608.04   33.10
  -1   2 -12  586.64   32.11
  -1   2 -12  529.28   31.48
  -1   2 -13   -0.91    4.47
   1   2  13    1.55    3.23
  -1  -2 -13    2.30    7.62
  -1   2 -13    1.41    1.77
   1   2  14   15.15    3.84
  -1   2 -14   24.18    2.24
  -1   2 -14   22.96    5.51
  -1  -2 -14   17.65    8.18
  -1  -2 -15   43.88    9.25
  -1   2 -15   34.99    2.91
   1   2  15   39.12    4.54
  -1   2 -15   25.34    6.59
  -1   2 -16   12.35    2.13
   1  -2  16   15.09    4.62
  -1   2 -16    1.50    6.75
   1   2  16   11.54    4.54
  -1   2 -17   17.31    7.66
  -1  -2 -17   19.59   10.65
  -1   2 -17   27.78    2.78
   1   2  17   41.09    5.05
   1  -2  17   26.66    5.16
  -1  -2 -18   16.36   11.39
   1   2  18   -0.12    5.03
   1  -2  18    7.59    5.13
  -1   2 -18    1.85    8.01
  -1   2 -18    3.96    2.26
  -1  -2 -19   10.82   12.49
   1  -2  19   17.49    6.13
  -1   2 -19   18.80    9.54
  -1   2 -19   16.50    2.67
   1   2  19   23.56    5.79
   1  -2  20  203.47   12.74
  -1  -2 -20  190.41   18.66
   1   2  20  199.78   12.48
  -1   2 -20  177.70   10.74
  -1   2 -20  189.53   15.22
   1  -2  21    4.23    6.99
   1   2  21    5.25    6.73
  -1  -2 -21   15.20   14.77
  -1   2 -21    3.59   10.74
  -1  -2 -22   14.44   16.06
   1   2  22   15.34    7.24
   1  -2  22    5.05    7.12
  -1   2 -22    7.16   12.82
  -1   2 -23   17.27   13.17
   1   2  23   -5.55    7.54
   1  -2  23    4.84    7.79
  -1  -2 -23   14.65   17.17
   1  -2  24    5.96    8.24
   1   2  24    3.27    8.06
  -1   2 -24   14.34   14.83
  -1  -2 -24    6.40   17.85
  -1   2 -25    9.44   16.35
   1  -2  25    9.79    8.93
   1   2  25    5.02    8.63
  -1  -2 -25   19.70   19.48
   1  -2  26   44.32   10.10
   1   2  26   36.53    9.45
  -1   2 -26   33.16   18.07
  -1  -2 -26   24.46   20.16
  -1   2 -27   43.74   20.44
   1   2  27   51.60   10.42
  -1  -2 -27   33.87   21.17
   1  -2  27   52.30   10.92
   1  -2  28   10.53   10.55
  -1   2 -28   23.45   20.73
  -1  -2 -28  -12.19   22.38
   1   2  28   -7.63   10.44
   1  -2  29   14.88   10.96
  -1   2 -29   16.20   21.47
  -1  -2 -29    9.39   24.72
   1   2  29    5.43   11.11
   1   3 -29   17.97   20.38
   1  -3 -29   19.17   24.34
  -1   3  29   20.60   12.01
  -1   3  29   30.93   11.07
  -1  -3  29   25.97   11.38
  -1  -3  28   96.18   11.52
   1  -3 -28   45.15   23.11
   1   3 -28   73.51   18.50
  -1   3  28   52.78   13.07
  -1   3  28   74.63   11.41
  -1   3  28   74.23   13.12
  -1  -3  27   25.95   10.69
  -1   3  27   29.31   13.03
  -1   3  27   40.34   11.99
  -1   3  27   21.23    9.64
   1   3 -27   18.15   16.44
   1  -3 -27   34.53   21.65
  -1   3  26   70.18   11.64
  -1   3  26   40.28   10.67
   1  -3 -26   29.91   20.83
  -1  -3  26   31.47   10.10
   1   3 -26   32.44   15.00
  -1   3  26   42.41    9.49
  -1  -3  25   20.41    8.52
  -1   3  25    1.47   10.53
   1   3 -25    3.19    3.10
  -1   3  25   -4.00    8.47
   1   3 -25   10.94   13.54
   1  -3 -25    0.71   19.83
  -1   3  25   21.59   10.11
  -1   3  24   12.67    8.14
  -1   3  24    7.25   10.41
  -1  -3  24   25.08    8.77
   1   3 -24    7.72    3.11
   1  -3 -24    5.92   17.76
   1   3 -24   19.24   13.02
  -1  -3  23   19.02    8.40
   1   3 -23   -0.72   12.22
  -1   3  23    7.13    7.44
   1  -3 -23   -1.83   17.06
   1   3 -23   10.41    3.16
   1   3 -22  411.55   25.12
   1   3 -22  454.97   28.28
   1  -3 -22  512.06   31.49
  -1  -3  22  517.96   26.46
  -1   3  22  494.10   26.49
   1   3 -21   26.05    3.32
   1  -3 -21   43.08   14.90
  -1  -3  21   36.48    7.41
   1   3 -21   33.73   10.54
  -1   3  21   27.56    7.40
   1  -3 -20  657.31   39.42
   1   3 -20  622.97   37.64
  -1  -3  20  626.76   36.54
  -1   3  20  629.68   36.43
   1  -3 -19  165.37   15.98
   1   3 -19  151.35   12.30
  -1  -3  19  153.90   10.59
  -1   3  19  136.14   10.55
   1   3 -18   31.05    7.97
  -1  -3  18   23.50    5.56
  -1   3  18   21.80    5.72
   1  -3 -18   34.32   11.27
   1  -3 -17  106.61   11.97
   1   3 -17   80.10    8.61
  -1   3  17   88.26    7.33
  -1  -3  17   87.74    7.54
  -1  -3  16   65.91    5.89
  -1   3  16   62.13    5.80
   1  -3 -16   87.12   10.21
   1   3 -16   57.99    7.48
  -1   3  15  108.63    7.72
  -1  -3  15  109.91    7.89
   1   3 -15  110.39    8.90
   1  -3 -15  110.04   11.04
   1   3 -14    0.31    5.07
   1  -3 -14   -5.11    7.53
  -1  -3  14    9.93    3.77
  -1   3  14    1.32    3.80
  -1  -3  13   87.73    6.27
   1  -3 -13   80.38    8.71
  -1   3  13   78.81    6.08
  -1   3  12  327.96   18.93
   1  -3 -12  325.58   20.42
   1  -3 -11  135.57   10.71
  -1   3  11  144.23    9.40
  -1   3  11  138.72    8.67
   1  -3 -10  254.89   15.99
  -1   3  10  240.53   15.26
  -1   3  10  260.55   14.68
   1  -3 -10  250.63   14.62
   1  -3  -9   66.68    4.60
   1  -3  -9   76.97    6.95
  -1   3   9   75.49    5.76
  -1   3   9   68.53    4.65
   1  -3  -8 3808.95  208.23
  -1   3   8 3730.38  208.25
  -1   3   8 3399.34  208.47
   1  -3  -8 3755.89  208.77
   1  -3  -7  594.57   33.53
  -1   3   7  585.19   32.79
   1  -3  -7  571.95   32.76
   1  -3  -6   26.85    4.75
   1  -3  -6   32.74    2.52
   1  -3  -5 1803.53  104.54
   1  -3  -5 1650.26  104.10
  -1   3   4  316.14   17.49
   1  -3  -4  270.25   17.50
   1  -3  -4  314.58   17.37
   1  -3  -4  344.23   18.27
   1  -3  -4  311.82   17.57
   1  -3  -3   34.05    4.31
  -1   3   3   41.43    2.52
   1  -3  -3   47.47    2.82
   1  -3  -3   44.02    2.69
   1  -3  -3   44.94    2.72
  -1   3  -2 1404.95   78.30
  -1  -3  -2 1383.78   77.93
   1   3   3   27.82    1.75
  -1  -3  -3   25.21    4.69
  -1  -3  -4  175.18   12.12
   1   3   4  185.73   10.62
  -1  -3  -4  188.86   10.60
  -1  -3  -5  228.44   13.97
  -1  -3  -5  234.62   15.97
   1   3   5  265.51   13.98
   1   3   5  263.45   15.14
   1   3   6 3634.39  202.97
   1   3   6 3710.51  203.44
  -1  -3  -6 3343.49  203.67
   1   3   7  460.93   22.24
  -1  -3  -7  422.08   22.99
   1   3   8 3115.46  177.84
  -1  -3  -8 3219.64  178.71
   1   3   8 3298.25  178.23
  -1  -3  -9   96.23    8.92
   1   3   9  102.40    6.19
   1   3   9   95.66    7.28
   1   3  10  381.09   22.13
  -1  -3 -10  400.63   23.80
   1   3  10  401.21   22.71
  -1  -3 -11  152.17   12.00
   1   3  11  153.62    9.12
   1   3  11  140.25    9.95
  -1   3 -11  152.52    9.50
   1   3  12  121.38    7.31
   1   3  12   94.93    8.32
  -1   3 -12  118.75    7.95
  -1  -3 -12  113.47   10.86
  -1   3 -13  130.37    8.46
   1   3  13  126.03    7.80
  -1  -3 -13  136.93   11.76
  -1   3 -13  113.51    7.11
   1   3  13  121.27    8.83
  -1   3 -14    4.89    2.09
  -1   3 -14   -2.75    4.96
  -1  -3 -14    5.17    9.03
   1   3  14   -0.93    3.73
  -1   3 -15   87.28    5.68
  -1   3 -15   92.84    7.97
  -1  -3 -15  116.17   11.69
   1   3  15   96.42    6.71
   1   3  16   15.75    4.40
  -1   3 -16   13.82    2.43
  -1  -3 -16   16.14   10.69
  -1   3 -16    8.10    6.26
   1   3  17   -3.07    4.53
  -1   3 -17    1.69    2.29
  -1   3 -17    1.08    6.81
   1  -3  17    8.62    5.11
  -1  -3 -18   26.68   12.26
   1   3  18    5.57    5.13
   1  -3  18   12.94    5.60
  -1   3 -18    6.46    7.78
  -1   3 -18    7.28    2.51
  -1  -3 -19   -8.23   12.77
   1   3  19    7.26    5.61
  -1   3 -19    0.30    2.67
   1  -3  19   -5.75    6.39
  -1   3 -19  -15.00    8.98
  -1  -3 -20  690.15   39.50
  -1   3 -20  586.57   34.86
   1   3  20  680.82   35.67
   1  -3  20  659.20   35.70
  -1   3 -20  621.90   36.91
   1   3  21    0.82    6.62
  -1   3 -21   -9.47   10.60
  -1  -3 -21   -4.01   15.95
  -1   3 -21   -0.67    2.92
   1  -3  21   -0.30    6.43
   1   3  22  434.06   25.55
   1  -3  22  424.64   25.62
  -1  -3 -22  388.92   30.68
  -1   3 -22  437.45   27.82
   1   3  23   49.61    8.52
  -1   3 -23   62.92   13.73
   1  -3  23   68.12    8.73
  -1  -3 -24   10.92   18.49
   1  -3  24   -1.55    8.46
   1   3  24    0.33    7.74
  -1   3 -24   16.12   14.56
   1  -3  25   -2.90    8.85
  -1  -3 -25   -4.35   19.94
  -1   3 -25  -13.49   15.32
   1   3  25   23.82    8.51
   1  -3  26   12.27    9.63
  -1   3 -26   32.75   16.77
   1   3  26   17.41    9.28
  -1  -3 -26  -12.29   21.36
   1  -3  27   -1.02   10.41
   1   3  27   11.14   12.24
  -1   3 -27  -13.77   17.97
  -1  -3 -27   -8.91   22.87
   1   3  27  -15.52    9.76
   1   3  28  101.46   14.50
   1  -3  28   99.17   12.23
   1   3  28   97.87   11.62
  -1   3 -28   94.49   21.29
  -1  -3 -28   79.24   24.06
   1   4 -29  -20.25   19.32
  -1  -4  29   -4.58   11.62
  -1   4  29    0.21   11.17
   1  -4 -29  -16.52   24.84
  -1   4  28    2.46   10.61
  -1   4  28   35.01   12.97
   1  -4 -28  -10.43   22.01
  -1  -4  28    1.75   10.75
   1   4 -28   19.14   16.91
  -1   4  28    7.30   11.22
  -1   4  27   86.52   12.52
  -1   4  27   87.86   12.16
   1  -4 -27   67.61   23.21
  -1  -4  27   86.88   11.76
   1   4 -27   63.63   16.97
  -1   4  27   67.42   10.92
  -1   4  26   56.51    9.73
  -1  -4  26   79.28   10.28
  -1   4  26   79.22   12.16
   1   4 -26   57.55    5.13
   1   4 -26   51.86   15.88
   1  -4 -26   85.14   22.41
  -1   4  26   65.05   12.53
  -1   4  25    0.73   10.72
   1  -4 -25   13.40   19.73
  -1   4  25    1.07    8.26
  -1  -4  25    2.31    9.81
  -1   4  25   17.81   10.80
   1   4 -25   -1.88    3.55
   1   4 -25   -8.54   13.64
  -1   4  24  134.87   11.45
   1   4 -24   97.97    6.97
   1  -4 -24  100.39   20.72
   1   4 -24   94.35   14.11
  -1   4  24  109.80   12.28
  -1  -4  24  117.89   10.67
  -1   4  24  107.67   10.33
  -1  -4  23    9.81    7.88
   1   4 -23   12.29    3.54
  -1   4  23    5.56    7.71
  -1   4  23    4.65    9.32
   1  -4 -23   23.30   18.25
   1   4 -23    0.34   11.26
  -1  -4  22  192.43   13.00
  -1   4  22  173.90   12.42
  -1   4  22  199.76   13.62
   1   4 -22  169.77   15.31
   1  -4 -22  165.22   20.14
   1   4 -22  163.47   10.44
  -1   4  21    1.77    6.93
  -1  -4  21   -0.31    6.78
  -1   4  21   -9.21    8.32
   1   4 -21    3.44    9.64
   1  -4 -21   -7.56   15.73
  -1  -4  20  240.62   15.37
  -1   4  20  234.08   16.02
  -1   4  20  233.57   15.06
   1   4 -20  224.33   16.71
   1  -4 -20  226.78   20.21
   1   4 -19  140.14   11.72
  -1   4  19  134.93   10.89
   1  -4 -19  145.87   16.09
  -1   4  19  138.39    9.93
  -1  -4  19  134.85   10.19
  -1   4  18   81.55    7.36
   1   4 -18   83.91    8.87
   1  -4 -18   68.55   13.11
  -1  -4  18   86.64    7.77
  -1  -4  17  249.94   15.12
  -1   4  17  246.97   15.02
   1   4 -17  232.83   15.95
   1  -4 -17  262.79   19.06
  -1   4  16   51.20    5.79
   1  -4 -16   52.23   11.30
  -1  -4  16   59.06    5.78
   1   4 -16   52.45    7.25
  -1  -4  15   -7.13    4.71
   1  -4 -15    4.51    9.55
  -1   4  15    1.95    4.51
  -1   4  14    1.24    3.71
   1  -4 -14   -3.81    8.91
  -1   4  13   53.12    4.74
  -1   4  13   49.68    6.47
   1  -4 -13   34.50    7.89
   1  -4 -12  476.25   26.50
  -1   4  12  444.19   24.69
   1  -4 -12  416.34   24.58
  -1   4  12  433.91   25.26
  -1   4  12  417.39   24.93
   1  -4 -11  653.74   37.03
   1  -4 -11  626.86   35.65
  -1   4  11  601.92   35.81
  -1   4  11  629.38   35.67
  -1   4  11  664.44   36.21
  -1   4  10    6.12    4.74
  -1   4  10   12.24    2.78
   1  -4 -10   14.19    6.47
   1  -4 -10   18.98    2.76
   1  -4  -9  510.77   29.99
  -1   4   9  538.40   30.03
   1  -4  -9  567.18   31.37
  -1   4   9  537.78   30.53
   1  -4  -8  672.24   39.65
  -1   4   8  714.11   39.67
   1  -4  -8  806.45   40.78
  -1   4   7   23.89    2.60
   1  -4  -7   27.31    2.54
   1  -4  -7   40.18    6.29
   1  -4  -6  274.71   15.84
  -1   4   6  240.89   14.47
  -1   4   6  232.58   14.30
   1  -4  -6  261.96   14.11
   1  -4  -6  220.88   14.31
   1  -4  -5  444.72   27.09
   1  -4  -5  505.70   28.31
   1  -4  -5  492.67   27.17
  -1   4   5  446.86   27.11
   1  -4  -5  496.29   26.97
   1  -4  -4  420.75   24.28
   1  -4  -4  401.51   23.24
   1  -4  -4  386.13   23.16
  -1   4   4  415.30   23.05
   1  -4  -4  424.58   23.21
   1  -4  -3 1824.89  108.46
  -1   4   3 1983.13  107.79
  -1   4   3 1919.60  108.35
   1  -4  -3 1838.72  107.91
   1  -4  -3 1870.74  107.84
   1  -4  -2   90.79    5.50
  -1   4   2   93.09    4.98
  -1   4   2   85.43    6.73
  -1   4   2   87.03    5.03
   1  -4  -2   79.91    4.97
   1  -4  -2   95.10    5.11
  -1   4   1    5.76    0.76
   1  -4  -1    4.16    2.37
   1  -4  -1    8.04    0.97
  -1   4   1    4.06    3.61
  -1   4   1    6.74    0.86
   1  -4   0    2.13    2.44
   1  -4   0    8.34    1.01
  -1  -4  -1   72.43    4.41
   1  -4   1   58.23    5.44
  -1   4  -1   75.53    5.21
  -1  -4  -2  189.49   11.01
  -1   4  -2  199.61   11.89
  -1  -4  -3  900.37   49.07
   1   4   3  837.91   49.07
  -1  -4  -3  910.20   49.99
  -1  -4  -4  144.05   12.34
  -1  -4  -4  184.32   10.12
   1   4   4  178.72   10.13
   1   4   4  165.67   10.29
  -1  -4  -5   39.09    2.34
   1   4   5   30.40    2.32
   1   4   5   32.53    2.79
  -1  -4  -5   31.51    6.81
  -1  -4  -6   79.11    8.26
   1   4   6   95.85    5.68
  -1  -4  -6   86.23    5.30
   1   4   6   89.69    5.33
   1   4   6  111.72    8.00
  -1  -4  -7   31.03    2.43
   1   4   7   31.37    2.44
  -1  -4  -7   30.55    6.96
   1   4   7   32.32    5.43
   1   4   8  201.52   11.47
  -1  -4  -8  174.71   13.60
   1   4   8  199.75   12.62
  -1  -4  -9   94.23    9.27
   1   4   9   87.72    7.15
   1   4   9   80.57    5.24
   1   4  10   31.60    3.14
  -1  -4 -10   38.25    8.38
   1   4  10   29.05    5.40
  -1  -4 -11  227.05   16.10
   1   4  11  209.42   14.27
   1   4  11  234.37   13.31
  -1  -4 -12  453.92   28.05
   1   4  12  450.73   25.79
   1   4  12  454.57   26.52
  -1  -4 -13    8.02    9.33
   1   4  13    5.42    3.29
   1   4  13   11.38    5.31
  -1   4 -13    1.34    4.11
  -1   4 -14    5.11    2.15
  -1   4 -14    9.06    4.94
   1   4  14    7.33    3.64
  -1  -4 -14   -4.89    9.89
   1   4  14    0.34    5.83
   1   4  15   -2.09    6.22
  -1   4 -15   -0.55    2.39
  -1   4 -15    1.25    5.41
  -1  -4 -15    1.30   10.73
   1   4  15   -2.35    3.90
  -1  -4 -16   69.75   12.07
   1   4  16   61.53    5.47
  -1   4 -16   56.10    4.47
  -1   4 -16   85.34    7.26
  -1  -4 -17   59.04   12.78
  -1   4 -17   69.07    7.95
   1   4  17   70.22    5.98
  -1   4 -17   55.36    4.42
  -1   4 -18  178.30   12.53
   1   4  18  186.23   11.30
  -1   4 -18  165.86   10.23
  -1  -4 -18  194.27   17.58
  -1   4 -19   21.18    3.13
  -1   4 -19   21.52    8.09
   1  -4  19   19.09    5.93
  -1  -4 -19   14.20   13.94
   1   4  19   24.26    5.64
  -1   4 -20  204.08   12.78
  -1  -4 -20  201.13   20.91
   1  -4  20  248.83   14.39
  -1   4 -20  216.21   16.07
   1   4  20  243.77   14.18
  -1  -4 -21   46.93   17.04
   1   4  21   69.65    7.95
   1  -4  21   75.70    7.73
  -1   4 -21   62.18   11.01
  -1   4 -21   58.42    4.92
  -1   4 -22   10.50   11.25
   1  -4  22   16.50    6.92
  -1  -4 -22   16.96   17.94
   1   4  22   23.97    7.14
  -1   4 -22   11.34    3.42
  -1   4 -23  141.23    9.40
  -1  -4 -23  123.11   20.97
   1   4  23  172.72   11.83
   1  -4  23  192.14   12.13
  -1   4 -23  165.41   15.84
   1  -4  24   -3.70    8.66
  -1  -4 -24    1.46   18.52
   1   4  24   -0.16    8.18
  -1   4 -24   18.04   13.55
   1   4  25   13.79    8.94
  -1  -4 -25   -6.96   19.68
  -1   4 -25   18.05   14.34
   1  -4  25    2.21    9.14
   1   4  25    5.05   10.73
   1   4  26   74.54   12.28
   1  -4  26   64.05   10.76
  -1   4 -26   42.59   16.53
   1   4  26   84.68   10.02
  -1  -4 -26   92.15   23.93
   1  -4  27   86.99   11.42
  -1   4 -27   57.28   19.03
   1   4  27   73.65   10.29
  -1  -4 -27   69.73   24.09
   1   4  27   57.18   12.96
   1  -4  28    5.80   11.09
  -1   4 -28   -3.51   18.46
   1   4  28    6.03   12.59
   1   4  28    9.09    9.77
  -1  -4 -28   39.34   25.17
   1   5 -29   20.14   18.77
  -1  -5  29   51.88   11.95
   1  -5 -29   32.77   26.71
  -1   5  29   26.42   10.69
  -1   5  28   -5.92   10.20
   1  -5 -28   11.90   25.09
  -1  -5  28  -29.34   11.66
   1   5 -28  -17.81   16.70
  -1   5  28   11.95   12.13
  -1   5  28   -5.73   11.28
  -1  -5  27  129.35   12.61
   1   5 -27   90.63    6.81
  -1   5  27   90.82   11.05
  -1   5  27  123.28   12.34
   1  -5 -27   98.00   25.01
   1   5 -27   76.12   16.27
  -1   5  27  104.49   13.45
   1  -5 -26   25.38   22.19
  -1  -5  26   30.45    9.78
  -1   5  26   29.50   11.47
   1   5 -26   20.21   14.42
  -1   5  26   40.61    9.20
  -1   5  26   42.19   11.52
   1   5 -26   27.64    4.31
   1  -5 -25    2.33   20.57
   1   5 -25    3.16    3.82
  -1   5  25   -2.67   10.41
  -1   5  25  -13.90   11.13
  -1   5  25    9.28    8.32
   1   5 -25   -8.00   12.37
  -1  -5  25  -16.59    9.52
  -1   5  24   -5.10    7.73
   1  -5 -24   19.99   20.11
   1   5 -24    2.31    3.85
  -1   5  24   11.35   10.03
  -1   5  24   13.00    9.58
   1   5 -24   -8.04   12.76
  -1  -5  24   -5.88    8.88
  -1   5  23   35.24    9.80
   1   5 -23   13.56   11.45
  -1  -5  23   26.81    8.39
  -1   5  23   11.26    9.72
   1  -5 -23   20.41   18.09
  -1   5  23   11.14    7.48
   1   5 -23   16.31    4.01
  -1   5  22   75.48    9.27
  -1   5  22   50.64    7.74
  -1   5  22   53.29    9.34
  -1  -5  22   55.13    8.49
   1  -5 -22   73.91   17.94
   1   5 -22   43.34    4.63
   1   5 -22   40.92   10.87
  -1   5  21  177.99   13.19
   1  -5 -21  184.57   20.30
   1   5 -21  189.06   14.27
  -1   5  21  173.35   12.00
  -1  -5  21  151.21   12.40
  -1  -5  20  220.77   14.32
   1   5 -20  225.86   15.64
  -1   5  20  204.04   14.88
  -1   5  20  206.19   13.93
   1  -5 -20  205.16   21.02
  -1   5  19   77.86    8.84
   1   5 -19   83.95    9.26
  -1   5  19   90.43    7.73
  -1  -5  19   98.92    8.13
   1  -5 -19   59.95   15.12
   1   5 -18   38.78    7.54
  -1  -5  18   40.66    6.62
   1  -5 -18   29.09   13.05
  -1   5  18   31.48    5.93
  -1   5  18   32.85    6.85
   1   5 -17  103.28    9.57
   1  -5 -17   89.85   14.28
  -1  -5  17  111.03    8.61
  -1   5  17  110.28    9.33
  -1   5  17  121.05    8.41
   1  -5 -16   23.51   11.04
  -1   5  16   22.32    5.89
  -1   5  16   27.54    4.95
  -1   5  15   97.12    6.98
   1  -5 -15   89.27   12.31
  -1   5  15   95.07    7.73
   1  -5 -14  218.43   16.32
  -1   5  14  203.24   12.93
  -1   5  14  213.77   13.36
  -1   5  14  238.38   14.15
   1  -5 -13   22.55    9.05
  -1   5  13   28.93    4.85
  -1   5  13   24.10    3.91
  -1   5  13   31.36    5.90
   1  -5 -13   24.99    3.84
   1  -5 -12   11.74    3.21
  -1   5  12   10.84    5.19
  -1   5  12   16.62    3.50
  -1   5  12    9.81    4.20
   1  -5 -12    4.23    8.50
  -1   5  11  148.86    9.23
  -1   5  11  139.36   10.34
   1  -5 -11  152.00    8.88
   1  -5 -11  148.89   11.97
  -1   5  11  139.72    8.99
  -1   5  10  535.21   29.77
   1  -5 -10  561.71   31.51
  -1   5  10  559.59   30.51
  -1   5  10  478.88   29.95
   1  -5 -10  523.34   29.73
  -1   5   9    2.47    2.47
   1  -5  -9    2.69    2.41
  -1   5   9    3.75    4.96
   1  -5  -9    0.30    7.17
   1  -5  -8  295.89   19.39
  -1   5   8  312.05   17.50
   1  -5  -8  303.24   17.36
  -1   5   8  298.65   17.36
   1  -5  -7 2161.76  121.44
  -1   5   7 2316.74  121.50
   1  -5  -7 2062.05  122.42
  -1   5   7 2049.36  121.45
  -1   5   6  697.79   42.37
   1  -5  -6  812.51   43.65
   1  -5  -6  766.26   42.45
   1  -5  -6  784.43   42.36
   1  -5  -5   56.69    4.51
  -1   5   5   69.62    3.91
   1  -5  -5   82.49    7.73
   1  -5  -5   62.01    4.29
   1  -5  -4  781.84   50.31
   1  -5  -4  787.34   49.33
   1  -5  -4  860.66   49.28
  -1   5   4  858.18   49.17
  -1   5   3   29.54    1.95
  -1   5   3   41.59    6.05
   1  -5  -3   25.97    1.74
  -1   5   3   29.09    1.75
   1  -5  -3   28.98    2.20
   1  -5  -2  158.01    8.81
  -1   5   2  147.57    8.12
   1  -5  -2  127.28    8.23
  -1   5   2  174.03   10.29
   1  -5  -1  211.63   13.44
  -1  -5   1  218.04   13.67
  -1   5   1  275.69   14.47
   1  -5  -1  229.59   12.96
  -1  -5   0  434.06   25.64
   1  -5   0  447.19   25.76
  -1   5   0  478.86   26.06
   1  -5   0  512.33   25.20
   1   5   0  417.80   25.12
   1  -5   1 5850.35  329.72
  -1  -5  -1 5871.84  329.46
  -1   5  -2  239.96   14.52
  -1  -5  -2  224.96   13.51
   1  -5   2  254.81   14.58
  -1  -5  -3   31.76    6.45
  -1  -5  -3   23.42    2.18
  -1  -5  -4  294.60   19.37
  -1  -5  -4  302.70   17.41
   1   5   4  270.60   17.45
  -1  -5  -4  325.51   17.32
   1   5   5    5.45    1.36
  -1  -5  -5    9.44    1.30
  -1  -5  -5    9.55    6.73
   1   5   5    6.84    2.16
  -1  -5  -6  223.87   15.82
   1   5   6  236.11   15.22
  -1  -5  -6  222.46   13.00
   1   5   6  240.96   13.02
   1   5   6  217.08   13.19
   1   5   7  541.75   31.45
  -1  -5  -7  568.54   31.30
   1   5   7  551.54   31.32
   1   5   7  545.07   32.60
  -1  -5  -7  514.77   33.22
   1   5   8   12.65    2.02
   1   5   8   16.27    5.28
  -1  -5  -8   21.02    7.84
   1   5   8    9.50    2.63
  -1  -5  -8   16.36    1.99
   1   5   9   24.58    2.76
   1   5   9   29.86    6.08
  -1  -5  -9   49.07    8.99
   1   5   9   30.32    3.42
  -1  -5  -9   29.98    2.66
   1   5  10  270.82   15.36
  -1  -5 -10  277.02   18.35
   1   5  10  261.33   16.28
   1   5  10  253.93   15.04
   1   5  11   77.22    5.53
  -1  -5 -11   74.94   10.88
   1   5  11   75.69    7.33
   1   5  11   90.06    6.02
  -1  -5 -12   54.71   10.15
   1   5  12   40.55    3.96
   1   5  12   37.46    6.46
   1   5  13   73.72    5.32
   1   5  13   64.83    7.55
  -1  -5 -13   68.88   10.95
   1   5  14  112.03    7.34
   1   5  14   86.81    8.77
  -1  -5 -14  117.55   13.16
   1   5  15  291.89   16.73
   1   5  15  289.97   17.85
  -1  -5 -15  288.65   20.88
  -1   5 -15  298.30   17.20
  -1   5 -15  273.64   16.30
   1   5  16  105.65    9.10
  -1   5 -16   98.44    6.54
  -1  -5 -16   93.04   13.63
   1   5  16  105.26    7.43
  -1   5 -16  103.66    8.23
   1   5  17  141.19    9.21
  -1   5 -17  124.66   10.25
  -1   5 -17  129.81    8.20
  -1  -5 -17  133.78   16.08
  -1  -5 -18   30.26   13.91
  -1   5 -18   40.80    3.84
  -1   5 -18   36.28    7.64
   1   5  18   40.89    5.85
  -1  -5 -19  101.71   16.89
   1   5  19  118.80    8.55
  -1   5 -19  113.27   10.31
  -1   5 -19   98.87    6.82
  -1   5 -20  220.93   14.27
   1   5  20  270.28   15.48
  -1  -5 -20  257.30   22.78
   1  -5  20  270.72   15.84
   1   5  20  268.39   16.17
  -1   5 -20  253.72   17.08
   1   5  21  430.76   24.48
  -1   5 -21  417.59   25.46
   1   5  21  432.32   23.95
  -1  -5 -21  365.86   29.80
   1  -5  21  429.54   24.19
  -1   5 -21  375.40   22.88
   1   5  22   52.68    9.06
  -1  -5 -22   39.19   18.50
   1  -5  22   68.03    8.72
  -1   5 -22   69.76   11.21
  -1   5 -22   50.09    4.85
   1   5  22   56.12    7.83
   1   5  23   27.38    8.86
   1   5  23    7.00    7.33
  -1   5 -23    7.17    3.79
  -1  -5 -23   10.29   20.62
  -1   5 -23   15.39   11.56
   1  -5  23   11.52    8.44
   1  -5  24   54.10    9.28
   1   5  24   37.30   10.11
  -1   5 -24   35.07    4.27
  -1  -5 -24   30.31   19.82
  -1   5 -24   29.68   12.39
   1   5  24   36.95    8.10
  -1  -5 -25    5.69   21.16
   1   5  25    0.24   11.09
   1   5  25   14.33    8.81
   1  -5  25    8.48    9.15
  -1   5 -25    0.81   13.67
   1   5  26    4.73    8.22
   1  -5  26    6.84    9.50
  -1  -5 -26   -6.85   21.60
  -1   5 -26   -1.78   14.84
   1   5  26   20.98   11.87
  -1  -5 -27   59.84   23.92
   1   5  27   39.18   11.78
   1   5  27   40.99    9.61
   1  -5  27   47.63   10.20
  -1   5 -27   36.18   17.24
  -1   5 -28   18.99   18.23
   1  -5  28   32.49   11.46
   1   5  28   16.90   12.87
   1   5  28   26.34    9.78
  -1  -5 -28   23.36   24.99
  -1  -6  28    4.53   10.68
  -1   6  28   22.01   11.04
   1  -6 -28    9.61   26.24
  -1   6  28    2.04    9.96
  -1   6  28   -7.57   12.94
   1   6 -28   -4.22   15.87
  -1   6  27   15.02    9.24
   1  -6 -27   12.79   23.80
   1   6 -27    7.63    4.34
  -1   6  27   12.14   11.13
  -1  -6  27   28.42   10.59
  -1   6  27   27.07   12.48
   1   6 -27   16.14   14.68
   1  -6 -26   50.71   22.86
  -1  -6  26   53.96   10.11
   1   6 -26   36.00    4.91
  -1   6  26   64.50    9.48
   1   6 -26   49.15   13.78
  -1   6  26   56.11   10.73
  -1   6  26   68.33   11.68
  -1  -6  25   11.35    9.30
  -1   6  25   10.97   10.47
  -1   6  25   -8.93    9.81
   1  -6 -25    7.44   20.91
   1   6 -25    9.04   12.03
   1   6 -25   -0.60    4.15
  -1   6  25    9.43    8.55
   1   6 -24    6.31    4.04
   1   6 -24   -2.65   11.68
  -1   6  24    7.02   10.26
  -1  -6  24    9.76    9.15
  -1   6  24   -1.16   10.21
  -1   6  24   13.90    7.95
   1  -6 -24   13.23   19.86
  -1   6  23   80.39   10.37
  -1   6  23  113.73   11.61
   1  -6 -23   88.43   20.54
   1   6 -23   65.83    6.05
  -1   6  23   92.87    9.18
  -1  -6  23   76.88    9.47
   1   6 -23   86.18   12.29
   1   6 -22   -3.87   10.20
  -1  -6  22    3.93    8.13
   1  -6 -22   -5.66   18.01
  -1   6  22    9.45    8.99
  -1   6  22    2.33    9.30
  -1   6  22   13.37    7.14
  -1   6  21   25.12    7.16
  -1   6  21   40.65    8.70
   1  -6 -21   66.83   17.45
  -1   6  21   45.10    8.75
  -1  -6  21   27.45    7.27
   1   6 -21   12.70    9.29
  -1  -6  20  340.95   21.57
  -1   6  20  334.95   21.49
   1   6 -20  367.52   22.48
  -1   6  20  414.09   21.98
   1  -6 -20  374.44   27.53
  -1   6  20  334.55   22.18
   1   6 -19   39.50    7.90
  -1  -6  19   40.36    7.22
  -1   6  19   35.04    6.27
   1  -6 -19   58.74   15.74
  -1   6  19   50.62    7.14
   1   6 -18  138.55   10.21
  -1  -6  18  122.22    9.23
  -1   6  18  118.89    9.49
  -1   6  18   98.95    8.67
   1  -6 -18  117.76   16.00
  -1   6  17   55.97    5.80
  -1   6  17   50.77    6.93
   1  -6 -17   43.23   13.00
   1  -6 -16  298.15   20.88
  -1   6  16  263.73   17.15
  -1   6  16  259.07   15.95
  -1   6  16  269.05   16.51
  -1   6  15    7.46    4.32
  -1   6  15    4.77    6.36
  -1   6  15   -7.29    5.28
   1  -6 -15   -7.35   11.97
  -1   6  14   27.67    4.25
  -1   6  14   31.73    5.13
   1  -6 -14   40.34   10.63
  -1   6  14   29.62    6.17
   1  -6 -14   30.53    4.05
   1  -6 -13    0.78    3.47
  -1   6  13    1.61    3.39
   1  -6 -13   -5.20    9.73
  -1   6  13    1.01    5.63
  -1   6  13   -3.68    4.72
  -1   6  12   59.42    5.71
  -1   6  12   61.58    4.90
  -1   6  12   62.11    7.11
   1  -6 -12   51.31    4.69
   1  -6 -12   71.39   10.68
  -1   6  11  119.16    9.02
  -1   6  11  105.46    7.63
  -1   6  11  102.05    7.20
   1  -6 -11  112.88    6.97
   1  -6 -10 5485.88  329.22
  -1   6  10 5892.77  329.78
  -1   6  10 6788.82  329.36
  -1   6  10 5764.33  329.26
   1  -6 -10 6256.61  330.56
  -1   6  10 5542.17  329.35
  -1   6   9   39.36    3.18
   1  -6  -9   38.49    8.07
  -1   6   9   32.90    4.05
   1  -6  -9   35.84    3.21
  -1   6   9   33.28    4.03
   1  -6  -8  298.93   16.26
  -1   6   8  264.35   16.26
   1  -6  -8  328.74   18.74
  -1   6   8  279.57   16.48
   1  -6  -7   26.79    3.23
   1  -6  -7   32.41    2.74
  -1   6   7   27.67    2.89
   1  -6  -7   41.27    7.89
   1  -6  -6  229.53   14.14
   1  -6  -6  225.64   16.54
  -1   6   6  255.77   13.95
   1  -6  -6  236.33   14.29
   1  -6  -5   28.77    2.79
   1  -6  -5   25.78    8.03
   1  -6  -5   25.72    2.55
  -1   6   5   32.55    2.07
   1  -6  -5   31.57    1.90
   1  -6  -4 2266.91  116.89
   1  -6  -4 2066.95  116.73
   1  -6  -4 2034.61  116.94
   1  -6  -4 1867.44  117.90
  -1   6   4 2067.57  116.78
  -1   6   4 1910.26  117.65
  -1   6   3  330.56   18.37
   1  -6  -3  324.50   18.99
  -1   6   3  356.83   20.43
   1  -6  -3  310.93   18.50
  -1   6   2  562.68   30.16
   1  -6  -2  482.15   30.25
   1  -6  -2  518.19   30.64
  -1   6   2  559.20   31.65
   1  -6  -1 1365.09   76.29
   1   6  -1 1313.51   75.85
   1  -6  -1 1436.27   75.93
  -1   6   1 1355.07   76.93
  -1  -6   1 1351.17   76.44
   1  -6   0  204.55   10.99
   1   6   0  182.87   10.90
  -1   6   0  201.86   12.89
   1  -6   0  235.66   12.13
  -1  -6   0  179.31   12.08
   1   6   1   32.19    3.59
   1  -6   1   33.55    5.84
   1   6   1   41.22    2.58
  -1  -6  -1   42.65    3.86
   1   6   2 1276.13   72.51
   1  -6   2 1344.34   73.12
  -1  -6  -2 1277.12   72.58
  -1   6  -3  419.62   30.63
  -1  -6  -3  559.19   29.82
  -1  -6  -4 4419.93  237.76
  -1  -6  -4 3938.69  238.70
  -1   6  -4 3669.37  238.37
  -1  -6  -4 4131.32  237.83
  -1  -6  -5    8.71    6.75
  -1  -6  -5    8.64    1.37
   1   6   5   10.37    2.20
  -1  -6  -5    4.62    1.96
   1   6   6  207.36   11.49
   1   6   6  200.65   11.28
  -1  -6  -6  200.29   14.13
  -1  -6  -6  187.06   11.26
   1   6   7  101.88    6.17
   1   6   7   91.71    5.72
  -1  -6  -7   93.25    5.68
  -1  -6  -7  101.11   10.07
   1   6   7   99.30    9.72
   1   6   8    3.97    2.87
   1   6   8    1.74    1.98
  -1  -6  -8    1.10    1.76
   1   6   8    0.26    6.66
  -1  -6  -9  150.46   13.07
  -1  -6  -9  120.56    7.78
   1   6   9  129.42    8.26
   1   6   9  143.52    7.86
   1   6   9  125.73   10.27
  -1  -6 -10  118.95   12.64
   1   6  10  107.84    7.77
   1   6  10  135.56    9.68
  -1  -6 -10  115.35    7.27
   1   6  10  127.15    7.31
   1   6  11   33.12    4.14
  -1  -6 -11   35.50    9.42
   1   6  11   32.59    3.37
   1   6  11   41.96    6.79
   1   6  12  258.90   14.94
   1   6  12  254.29   15.25
  -1  -6 -12  251.69   19.02
   1   6  12  254.57   16.39
   1   6  13   -4.97    6.09
   1   6  13   -1.74    4.44
  -1  -6 -13    7.61    9.96
   1   6  13    1.54    3.19
   1   6  14   -6.35    6.41
   1   6  14    5.63    4.99
  -1  -6 -14    7.04   11.25
   1   6  14   -2.17    3.60
   1   6  15   70.69    5.96
  -1  -6 -15   71.06   13.43
   1   6  15   71.32    8.11
   1   6  15   81.50    7.10
   1   6  16  223.60   13.10
   1   6  16  210.56   14.18
  -1   6 -16  201.45   13.32
  -1   6 -16  192.08   12.03
   1   6  16  215.14   12.59
  -1  -6 -16  191.80   18.37
   1   6  17   25.98    7.39
   1   6  17   17.82    4.76
   1   6  17    8.32    6.04
  -1   6 -17   20.71    6.29
  -1  -6 -17   22.13   14.12
  -1   6 -17   15.20    3.33
   1   6  18   21.32    8.12
   1   6  18   15.69    5.36
  -1   6 -18    7.47    6.88
   1   6  18   19.17    6.80
  -1   6 -18   16.04    3.55
  -1  -6 -18   17.73   14.97
  -1  -6 -19   19.36   15.74
   1   6  19   29.57    7.78
  -1   6 -19   39.53    4.18
  -1   6 -19   46.27    7.98
   1   6  19   39.52    6.13
   1   6  20  149.35   10.45
  -1   6 -20  132.51    9.07
  -1   6 -20  179.02   12.37
  -1  -6 -20  153.18   19.88
   1   6  20  166.76   11.73
  -1   6 -21    4.94    3.64
   1   6  21   15.43    6.60
   1   6  21   28.64    8.13
   1  -6  21    1.93    7.40
  -1   6 -21    6.37    9.23
  -1  -6 -21   -7.10   18.09
  -1  -6 -22   58.86   19.55
   1  -6  22   75.27    8.43
  -1   6 -22   57.20    5.22
   1   6  22   58.46    7.85
   1   6  22   78.94    9.80
  -1   6 -22   63.74   11.35
  -1   6 -23   14.31    4.03
   1   6  23   31.40    7.30
   1  -6  23   38.24    8.39
  -1   6 -23   16.32   11.05
   1   6  23   40.36    9.82
  -1  -6 -23   15.63   20.14
   1  -6  24   11.58    8.37
   1   6  24   16.60    8.12
   1   6  24   12.24   10.11
  -1   6 -24   15.64    4.23
  -1   6 -24   19.77   12.06
  -1  -6 -24   45.83   21.43
   1  -6  25    3.08    8.90
  -1   6 -25   10.21   13.94
  -1  -6 -25    7.77   21.91
  -1   6 -25    1.40    4.09
   1   6  25    8.31    8.30
   1   6  25   -9.74   10.70
   1   6  26  145.46   13.55
   1  -6  26  110.69   12.07
  -1   6 -26  102.45   16.44
   1   6  26  113.94   11.20
  -1  -6 -26   96.93   25.60
   1  -6  27    1.87   10.85
  -1  -6 -27    3.74   24.04
  -1   6 -27    8.20   15.69
   1   6  27   -7.65    9.35
   1   6  27   19.01   11.33
   1   6  28   15.08    9.07
  -1   6 -28  -10.14   16.91
  -1  -6 -28   -7.75   25.43
   1  -6  28   -1.52   11.15
   1   6  28   -0.55   12.68
   1   7 -28   25.31   15.23
  -1   7  28   33.05   10.22
  -1  -7  28    5.92   11.64
  -1   7  28   11.04   12.59
   1  -7 -28   58.35   27.72
  -1   7  28   56.09   11.50
   1  -7 -27  130.49   26.84
  -1   7  27  131.10   14.10
  -1   7  27  120.70   12.33
   1   7 -27   96.91   16.45
  -1   7  27  115.98   12.07
  -1  -7  27  134.13   12.80
   1   7 -27  104.23    7.92
   1   7 -26   44.09   13.32
  -1   7  26   41.16   11.74
  -1  -7  26   50.33    9.95
   1  -7 -26   41.37   24.23
   1   7 -26   46.20    5.55
  -1   7  26   62.28   11.18
  -1   7  26   48.84    9.30
  -1   7  25   15.91    9.88
  -1   7  25   -5.17    8.86
  -1  -7  25    5.79    9.47
  -1   7  25    8.36   10.78
   1  -7 -25  -14.09   21.88
   1   7 -25    3.43   11.91
   1   7 -25    3.23    4.56
  -1  -7  24   -2.11    9.30
  -1   7  24    3.75   10.05
   1  -7 -24  -19.99   21.44
   1   7 -24   -0.94   11.57
  -1   7  24    1.53    7.99
   1   7 -24   -3.01    4.66
  -1   7  24    4.56    9.56
   1  -7 -23    1.59   19.83
  -1   7  23   -0.22    9.71
   1   7 -23    3.45    4.42
  -1  -7  23    2.56    7.89
  -1   7  23   -3.06    9.37
   1   7 -23    9.51   10.40
  -1   7  23   12.15    7.55
  -1   7  22  179.73   12.91
   1   7 -22  138.34   13.10
  -1   7  22  133.27   11.14
  -1   7  22  135.65   12.52
  -1  -7  22  155.25   11.94
   1  -7 -22  109.63   20.79
  -1   7  21  246.93   16.63
  -1  -7  21  260.26   17.15
   1   7 -21  256.47   18.09
   1  -7 -21  250.69   24.49
  -1   7  21  236.35   17.56
  -1   7  20   57.67    8.81
   1  -7 -20   31.33   17.05
  -1  -7  20   41.33    7.55
  -1   7  20   38.18    6.61
   1   7 -20   26.62    8.59
  -1   7  20   42.75    8.32
  -1   7  19    7.22    6.89
  -1   7  19    9.99    5.90
  -1  -7  19    7.74    6.37
  -1   7  19   -2.18    7.27
  -1   7  18   13.39    6.84
  -1   7  18    6.86    6.85
  -1   7  18    9.31    5.57
   1  -7 -18   24.52   15.28
  -1   7  17  136.82    9.81
  -1   7  17  152.75   10.35
   1  -7 -17  147.18   16.61
  -1   7  17  144.33   10.61
  -1   7  17  145.33   12.27
  -1   7  16  331.38   17.91
   1  -7 -16  294.86   22.56
  -1   7  16  290.41   18.97
  -1   7  16  295.19   18.11
  -1   7  16  271.00   17.55
  -1   7  15  237.65   15.86
   1  -7 -15  275.45   19.54
  -1   7  15  241.53   14.88
   1  -7 -15  215.46   14.16
  -1   7  15  283.47   14.94
  -1   7  15  232.13   14.30
  -1   7  14   25.41    4.25
  -1   7  14   21.47    5.12
  -1   7  14   32.40    5.28
   1  -7 -14   35.34    4.47
   1  -7 -14   28.45   11.81
  -1   7  14   39.68    7.41
   1  -7 -13  204.69   17.94
  -1   7  13  265.00   15.16
   1  -7 -13  245.76   14.72
  -1   7  13  249.43   16.21
  -1   7  13  221.58   14.74
  -1   7  13  291.36   15.14
  -1   7  12  353.16   22.82
   1  -7 -12  354.38   25.74
  -1   7  12  398.15   23.09
  -1   7  12  393.57   23.91
   1  -7 -12  379.43   22.75
   1  -7 -11   33.64    3.38
  -1   7  11   29.05    4.37
  -1   7  11   27.33    6.62
   1  -7 -11   27.96   10.18
  -1   7  11   33.12    4.77
  -1   7  11   28.39    3.57
   1  -7 -10  424.45   26.27
  -1   7  10  408.77   23.64
  -1   7  10  428.69   24.74
   1  -7 -10  393.32   23.58
  -1   7  10  433.87   23.89
  -1   7  10  424.58   23.81
   1  -7  -9   11.50    8.87
  -1   7   9   -1.89    3.51
   1  -7  -9    2.52    2.40
  -1   7   9    7.70    2.78
   1  -7  -8  549.61   30.67
  -1   7   8  560.31   30.54
  -1   7   8  522.61   30.71
   1  -7  -8  473.87   32.59
   1  -7  -8  526.85   30.51
   1  -7  -7 2270.59  134.19
   1  -7  -7 2373.78  135.58
  -1   7   7 2173.74  134.31
  -1   7   7 2493.83  134.06
   1  -7  -7 2380.03  134.29
   1  -7  -6  149.56    8.19
   1  -7  -6  139.05    8.38
   1  -7  -6  133.45    7.82
   1  -7  -6  160.99   12.49
  -1   7   6  145.14    7.93
   1  -7  -5  576.02   32.15
  -1   7   5  564.03   32.01
   1  -7  -5  567.08   32.25
   1  -7  -5  568.13   31.93
   1  -7  -5  583.26   34.08
  -1   7   4  223.00   16.65
  -1   7   4  257.84   14.17
   1  -7  -4  237.16   14.38
   1  -7  -4  223.40   14.85
   1  -7  -3  336.61   17.70
   1  -7  -3  286.82   18.26
  -1   7   3  277.90   19.84
  -1   7   3  306.23   17.56
  -1   7   2   10.13    1.13
   1  -7  -2    9.16    3.70
   1  -7  -2    6.03    1.56
  -1   7   2   13.73    7.14
  -1  -7   1 1319.74   72.53
  -1  -7   1 1296.98   71.84
   1   7  -1 1333.11   71.85
  -1   7   1 1350.74   73.05
   1  -7  -1 1323.25   71.93
   1  -7  -1 1333.04   72.39
  -1   7   1 1075.28   71.91
  -1  -7   0 7361.53  421.89
  -1   7   0 7077.94  422.20
   1  -7   0 7306.24  421.51
  -1  -7   0 8264.46  421.47
   1   7   0 7193.84  421.45
   1  -7   0 7293.04  421.95
   1   7   0 6987.06  421.78
   1  -7   1   50.41    6.91
   1   7   1   46.43    4.77
  -1  -7  -1   60.85    5.38
   1   7   1   59.73    3.54
   1   7   2   27.05    3.42
   1  -7   2   33.73    6.01
  -1  -7  -2   29.17    3.79
   1   7   2   31.89    2.34
  -1  -7  -3   -0.18    2.72
  -1  -7  -4 1317.07   71.00
  -1  -7  -4 1133.05   69.84
  -1  -7  -4 1291.18   69.70
  -1  -7  -5  126.23    7.75
  -1  -7  -5  149.10   11.20
  -1  -7  -5  131.63    7.57
  -1  -7  -6    6.89    2.05
  -1  -7  -6    6.05    7.45
  -1  -7  -6    2.68    1.59
   1   7   6    3.12    2.51
   1   7   7   54.72    8.98
  -1  -7  -7   38.41    9.41
  -1  -7  -7   48.31    3.40
   1   7   7   51.60    4.05
   1   7   8  177.03   10.34
   1   7   8  172.45   10.00
  -1  -7  -8  158.41   14.59
   1   7   8  198.07   13.52
  -1  -7  -8  165.51    9.96
  -1  -7  -9   11.11    2.22
   1   7   9    5.74    2.35
  -1  -7  -9    7.79    9.93
   1   7   9    8.47    3.15
   1   7   9   10.72    7.53
  -1  -7  -9    6.65    1.01
  -1  -7 -10   11.68    2.37
   1   7  10    7.28    7.25
   1   7  10    8.93    3.63
  -1  -7 -10    6.85   10.49
   1   7  10    8.29    2.60
  -1  -7 -11   38.25   10.72
   1   7  11   23.27    7.53
  -1  -7 -11   30.16    3.28
   1   7  11   30.03    3.32
   1   7  11   27.66    4.32
  -1  -7 -12   41.47    3.95
   1   7  12   45.35    4.85
  -1  -7 -12   32.59   10.62
   1   7  12   36.51    7.38
   1   7  12   48.24    4.04
   1   7  13    8.92    4.53
   1   7  13   -2.18    7.19
   1   7  13    5.08    3.34
   1   7  14    6.30    4.57
   1   7  14   11.50    3.69
  -1  -7 -14   13.76   12.34
   1   7  14    4.08    7.36
   1   7  15  424.18   26.07
   1   7  15  478.92   26.46
  -1  -7 -15  484.74   30.36
   1   7  15  478.36   27.33
  -1  -7 -16  220.11   19.91
   1   7  16  212.99   13.83
   1   7  16  220.71   15.11
   1   7  16  213.82   13.19
  -1   7 -17   81.33    7.75
   1   7  17   74.49    6.59
   1   7  17   82.23    9.44
   1   7  17   79.92    7.65
  -1  -7 -17   86.50   15.94
  -1   7 -17   73.18    5.71
  -1   7 -18   10.43    3.68
  -1   7 -18    2.28    6.64
   1   7  18   12.00    5.35
   1   7  18    9.35    6.24
   1   7  18   17.76    8.22
   1   7  19   32.23    5.91
  -1  -7 -19   18.67   16.95
  -1   7 -19   18.15    7.45
   1   7  19   35.36    9.33
   1   7  19    8.18    6.69
  -1   7 -19   11.92    3.85
  -1  -7 -20  109.64   19.47
  -1   7 -20  107.50   10.02
   1   7  20  117.90    8.63
   1   7  20   97.14   10.17
  -1   7 -20   92.77    6.94
  -1   7 -21  352.09   21.26
   1   7  21  374.42   22.88
   1   7  21  395.02   22.12
  -1   7 -21  362.58   23.31
  -1  -7 -21  440.16   30.17
  -1   7 -22  230.98   17.02
  -1   7 -22  214.83   13.76
  -1  -7 -22  227.53   25.21
   1  -7  22  250.88   15.83
   1   7  22  249.55   16.47
   1   7  22  246.29   15.05
  -1   7 -23   18.98   11.01
   1  -7  23   13.89    8.17
  -1   7 -23    7.58    4.28
   1   7  23   20.71    9.23
   1   7  23    5.98    7.40
  -1  -7 -23   -3.32   20.44
  -1   7 -24   -3.83   11.40
  -1   7 -24    5.13    4.28
   1   7  24   -0.63    7.69
  -1  -7 -24   23.32   21.71
   1   7  24   19.52    9.66
   1  -7  24    6.19    8.47
   1  -7  25    7.25    9.10
  -1  -7 -25   -4.49   23.05
  -1   7 -25   22.54   12.83
   1   7  25  -12.64   10.89
   1   7  25    1.82    7.91
  -1   7 -25    2.87    4.31
  -1  -7 -26   13.05   24.68
  -1   7 -26   17.90    4.64
  -1   7 -26    1.95   13.96
   1  -7  26   21.07    9.64
   1   7  26   19.60    8.23
   1   7  26   29.80   11.38
   1  -7  27   14.27   10.45
   1   7  27    5.45    9.07
   1   7  27    8.92   11.42
  -1   7 -27   25.34   15.71
   1   7  27   25.81   12.33
   1  -7  28   13.21   11.15
  -1  -7 -28   37.04   27.20
   1   7  28   26.77    9.45
   1   7  28   45.30   12.45
  -1   7 -28   13.53   17.52
   1  -8 -28   20.03   28.03
  -1   8  28   14.76    9.80
   1   8 -28   15.44   15.29
  -1  -8  28   -4.36   11.49
  -1   8  28   23.01   12.94
   1  -8 -27   82.08   26.89
  -1   8  27   79.14   11.34
   1   8 -27   50.20    6.13
  -1   8  27   65.92   12.30
  -1  -8  27   63.03   11.02
  -1   8  27   69.73    9.77
   1   8 -27   45.10   14.62
  -1   8  26    2.98    8.66
   1   8 -26    2.97    5.04
  -1   8  26    5.61   10.28
   1   8 -26    2.49   13.87
  -1  -8  26    4.88   10.42
   1  -8 -26   18.33   25.12
  -1   8  26    1.31   11.37
  -1   8  25   23.34    8.75
  -1   8  25   45.11   11.52
   1   8 -25   44.31   12.16
   1   8 -25   35.73    5.35
   1  -8 -25   67.54   23.53
  -1   8  25   53.65   10.33
  -1  -8  25   51.09   10.33
   1   8 -24   64.48   11.56
  -1   8  24   71.91    9.81
  -1  -8  24   35.85    9.66
   1  -8 -24   64.65   22.51
   1   8 -24   63.16    5.91
  -1   8  24   57.15    8.83
  -1   8  24   36.61   10.12
   1   8 -23   -1.66   10.43
  -1   8  23   10.94    9.21
   1  -8 -23   31.34   21.62
  -1   8  23   10.50    7.64
  -1  -8  23   -0.93    8.54
  -1   8  23   -2.95    9.86
  -1   8  22   29.71    7.60
  -1   8  22   37.34    9.05
  -1  -8  22   35.74    8.72
   1   8 -22   28.90   10.03
  -1   8  22   58.29    9.67
   1  -8 -22   55.82   20.40
   1  -8 -21   38.51   18.49
  -1  -8  21   36.15    8.31
  -1   8  21   27.74    8.49
   1   8 -21   21.67    9.28
  -1   8  21   28.86    7.20
  -1   8  21   23.83    8.77
  -1   8  20  297.69   16.71
  -1   8  20  243.23   16.80
   1  -8 -20  246.01   24.13
  -1   8  20  227.88   16.06
  -1   8  19   44.86    6.83
   1  -8 -19   36.85   16.72
  -1   8  19   46.82    8.15
  -1   8  19   56.59    7.90
  -1   8  18  121.81    9.98
  -1   8  18  111.14    8.99
   1  -8 -18  129.22   18.36
  -1   8  18  116.62   11.46
  -1   8  18  147.57   10.71
  -1   8  17  594.68   37.14
  -1   8  17  612.22   36.77
  -1   8  17  595.99   37.73
   1  -8 -17  608.03   40.59
  -1   8  16  150.98   10.95
  -1   8  16  135.94    9.89
   1  -8 -16  131.46    9.81
   1  -8 -16  155.99   17.09
  -1   8  16  149.57   12.24
  -1   8  15   67.10    8.85
  -1   8  15   71.45    7.09
  -1   8  15   70.61    6.51
   1  -8 -15   71.20   14.12
  -1   8  15  103.94    7.59
   1  -8 -15   73.07    5.94
  -1   8  14   25.53    5.45
   1  -8 -14   33.86    4.17
  -1   8  14   26.69    4.47
  -1   8  14   21.51    7.38
  -1   8  14   36.64    5.94
   1  -8 -14   36.48   11.41
  -1   8  13    6.79    5.00
   1  -8 -13   -7.88   11.20
  -1   8  13    4.24    3.77
  -1   8  13    1.44    4.64
   1  -8 -13   -1.19    3.45
  -1   8  13    2.48    7.28
  -1   8  12  294.06   17.10
   1  -8 -12  278.09   16.65
  -1   8  12  305.55   17.11
  -1   8  12  279.46   16.78
   1  -8 -12  261.52   21.28
  -1   8  12  298.32   18.38
  -1   8  11 1439.76   79.23
  -1   8  11 1448.54   79.43
  -1   8  11 1441.01   80.08
   1  -8 -11 1406.72   81.22
   1  -8 -11 1342.78   79.17
  -1   8  10  251.66   14.82
  -1   8  10  240.07   16.35
  -1   8  10  268.43   14.52
   1  -8 -10  228.12   14.41
   1  -8 -10  261.57   18.99
  -1   8   9  305.48   17.61
   1  -8  -9  296.43   17.51
   1  -8  -9  299.60   17.34
   1  -8  -9  301.95   20.65
   1  -8  -8    1.34    0.84
   1  -8  -8   -0.86    9.30
   1  -8  -8    2.62    2.42
  -1   8   8    2.28    1.27
   1  -8  -8    1.15    2.85
   1  -8  -7  174.80   14.90
  -1   8   7  172.24    9.65
   1  -8  -7  159.13    9.94
   1  -8  -7  167.97   10.18
   1  -8  -6  142.43    8.79
  -1   8   6  146.52    8.31
   1  -8  -6  116.34   12.31
   1  -8  -6  142.36    8.62
  -1   8   5 1209.09   67.74
   1  -8  -5 1195.83   67.95
   1  -8  -5 1213.00   68.17
   1  -8  -5 1156.56   69.41
   1  -8  -4   12.83    3.58
   1  -8  -4   12.41    1.95
  -1   8   4    8.79    1.06
  -1   8   4   15.28    7.67
  -1   8   3 1162.09   58.64
   1  -8  -3  992.50   56.96
  -1   8   3 1073.10   56.86
   1  -8  -3 1031.10   57.41
  -1   8   2  157.58    9.86
   1  -8  -2  180.05    9.84
  -1   8   2  174.46   13.22
   1   8  -2  147.20   11.50
   1  -8  -2  192.80   10.77
   1  -8  -1  473.93   27.30
  -1   8   1  469.58   28.38
  -1  -8   1  489.29   26.41
   1   8  -1  457.52   27.21
   1   8  -1  478.20   26.42
   1  -8  -1  437.92   26.51
  -1   8   1  437.84   26.52
  -1  -8   1  489.19   27.44
   1  -8   0    2.35    5.30
  -1  -8   0   -0.30    4.19
  -1   8   0    3.36    6.58
   1  -8   0   -5.28    1.44
   1   8   0   -1.70    1.34
   1   8   0   -5.97    3.84
  -1  -8   0   -4.60    1.40
   1  -8   1  888.82   46.78
   1   8   1  832.05   47.18
   1   8   1  800.58   46.74
   1  -8   1  727.25   47.67
  -1  -8  -1  820.08   47.30
   1   8   2  649.18   34.53
  -1  -8  -2  574.86   35.01
   1  -8   2  514.05   35.68
   1   8   2  561.44   34.88
   1   8   3 2773.85  153.25
  -1  -8  -3 2604.72  153.51
  -1  -8  -4  910.73   50.81
  -1  -8  -4  888.50   50.61
  -1  -8  -5 1191.15   67.13
  -1  -8  -5 1162.88   67.35
  -1  -8  -5 1214.12   67.03
  -1  -8  -5 1070.36   68.47
  -1  -8  -6  104.07   11.12
  -1  -8  -6   97.31    6.05
  -1  -8  -6  103.31    6.30
  -1  -8  -7   28.36    3.04
   1   8   7   15.66    8.96
  -1  -8  -7   20.12    9.21
  -1  -8  -7   28.89    2.60
   1   8   8  105.17    7.47
   1   8   8  120.74   11.32
  -1  -8  -8  136.13   12.49
  -1  -8  -8  118.20    6.92
  -1  -8  -9   62.50   10.81
  -1  -8  -9   70.99    4.63
   1   8   9   88.48    9.88
   1   8   9   60.11    5.32
   1   8   9   63.37    4.60
  -1  -8 -10    9.26    1.07
  -1  -8 -10   12.26    2.59
   1   8  10   16.04    3.68
  -1  -8 -10    9.82    9.73
   1   8  10   10.20    2.78
   1   8  10   11.04    8.06
  -1  -8 -11  918.68   52.85
   1   8  11  934.29   52.89
  -1  -8 -11  936.77   52.64
   1   8  11  979.80   53.13
   1   8  11  994.63   54.26
  -1  -8 -11  810.72   55.41
   1   8  12  447.22   26.09
   1   8  12  425.81   24.31
  -1  -8 -12  451.37   28.59
  -1  -8 -12  398.18   24.25
   1   8  12  466.31   24.69
   1   8  13    8.84    3.45
  -1  -8 -13   -6.23   12.54
   1   8  13    8.85    4.60
   1   8  13   20.13    7.94
  -1  -8 -13    3.64    3.20
   1   8  14   14.57    4.98
   1   8  14   16.63    3.93
  -1  -8 -14   24.88   13.13
   1   8  14   -0.27    7.64
   1   8  15   19.02    8.24
   1   8  15   25.42    5.92
   1   8  15   29.21    4.36
   1   8  16  457.58   26.35
   1   8  16  444.82   27.77
  -1  -8 -16  436.03   31.34
   1   8  16  464.36   26.88
  -1  -8 -17   36.43   16.44
   1   8  17   45.93    6.65
   1   8  17   38.61    5.58
   1   8  17   45.16    9.09
   1   8  18   71.40    8.13
   1   8  18   68.69    9.78
  -1   8 -18   59.26    5.33
  -1  -8 -18   74.70   17.89
   1   8  18   68.82    6.49
   1   8  19   -0.71    7.66
   1   8  19   15.08    5.81
  -1   8 -19   -1.85    3.96
   1   8  19    4.30    9.18
  -1   8 -19   -9.05    7.19
  -1   8 -20  192.79   13.85
   1   8  20  217.31   12.67
   1   8  20  185.73   13.69
  -1  -8 -20  202.70   22.32
   1   8  20  199.69   14.75
  -1   8 -20  167.46   11.42
  -1   8 -21    9.49    8.68
   1   8  21    9.15    6.48
  -1   8 -21   -1.94    4.17
  -1  -8 -21   14.38   19.34
   1   8  21    1.38    8.54
   1   8  22  102.25    8.98
  -1   8 -22   97.93   11.57
  -1   8 -22   90.72    7.16
   1   8  22  100.07   10.79
  -1  -8 -22   97.12   22.25
   1   8  23   39.03    7.58
  -1  -8 -23   10.37   22.78
  -1   8 -23   41.91   11.21
   1   8  23   24.01    9.71
  -1   8 -23   35.56    5.04
   1  -8  23   40.16    8.92
  -1   8 -24    1.71    4.52
  -1   8 -24    3.89   10.99
   1   8  24    6.13    7.56
   1  -8  24    9.04    9.36
   1   8  24   -5.05   10.09
   1  -8  25   33.28    9.84
  -1  -8 -25   23.31   23.72
  -1   8 -25    5.95   12.26
   1   8  25   22.95    8.93
  -1   8 -25   28.36    5.16
   1   8  25   46.17   10.87
  -1   8 -26   -1.48    5.04
  -1  -8 -26   -1.36    5.02
   1   8  26   -2.26    8.87
   1   8  26    2.61   12.02
  -1  -8 -26   35.78   25.18
   1  -8  26   -6.47   10.34
   1   8  26    6.54   11.01
  -1   8 -26    7.26   13.29
  -1  -8 -27  106.92   26.03
  -1   8 -27   68.47    6.78
  -1  -8 -27   81.05    6.84
   1   8  27   89.68   10.51
   1   8  27  108.20   13.00
  -1   8 -27   48.46   15.52
   1  -8  27   69.51   12.26
   1   8  27   85.20   14.17
   1   8  28   27.16   12.76
   1   8  28   -4.16    8.99
  -1   8 -28   -3.96   15.76
   1  -8  28   16.92   11.61
  -1  -8 -28   -7.21   28.38
  -1   9  28  188.83   14.09
   1  -9 -28  123.17   30.29
  -1  -9  28  160.02   15.37
  -1   9  28  161.26   16.59
   1   9 -28  130.27   18.17
   1  -9 -27   46.58   28.11
  -1  -9  27   -2.70   11.15
   1   9 -27   15.45    5.47
  -1   9  27   14.30   10.86
  -1   9  27    8.10    9.46
   1   9 -27    2.23   14.10
  -1   9  27   13.44   11.91
   1  -9 -26   31.68   25.86
  -1   9  26   60.84   10.99
  -1   9  26   83.70   12.18
  -1  -9  26   73.32   11.13
   1   9 -26   41.38   12.88
   1   9 -26   53.09    6.32
  -1   9  26   46.89    9.36
  -1   9  25   13.51    8.45
   1  -9 -25  -21.38   24.95
   1   9 -25   -5.61   12.31
  -1   9  25   14.58   11.30
  -1   9  25    7.08    9.82
   1   9 -25   -2.81    5.33
  -1  -9  25  -10.15    9.25
  -1  -9  24   25.97    9.53
  -1   9  24   44.99   10.74
  -1   9  24   42.19    8.61
   1   9 -24   27.68   10.76
  -1   9  24   34.01    9.34
   1   9 -24   23.74    5.38
   1  -9 -24   39.12   23.79
  -1   9  23   79.76    9.51
  -1  -9  23   77.09   10.13
   1  -9 -23   41.90   22.64
  -1   9  23   67.41    9.82
   1   9 -23   64.57   11.05
  -1   9  23   66.46    8.70
  -1   9  22  257.28   16.79
   1   9 -22  266.08   17.46
  -1   9  22  232.11   16.17
  -1   9  22  257.47   17.23
   1  -9 -22  185.83   26.14
  -1  -9  22  249.26   17.09
   1  -9 -21   27.11   20.34
  -1   9  21   31.48    8.16
  -1   9  21   22.57    8.38
  -1   9  21   12.68    6.99
  -1   9  20   97.35    8.47
  -1   9  20   74.02    9.08
   1  -9 -20  108.93   20.27
  -1   9  20   79.44    9.59
  -1   9  19   -3.44    8.02
  -1   9  19  -12.81    9.65
  -1   9  19   -1.63    7.00
  -1   9  19    7.99    6.02
  -1   9  18   -7.09    7.05
  -1   9  18    3.53    5.59
  -1   9  18    1.55    6.53
  -1   9  18    0.81    8.66
   1  -9 -18   -8.60   16.83
  -1   9  17    7.05    6.22
  -1   9  17   -5.40    8.66
  -1   9  17    2.14    5.12
   1  -9 -17   -9.70    4.93
   1  -9 -17    4.80   15.95
  -1   9  17   -0.80    6.18
  -1   9  16  289.29   17.44
  -1   9  16  251.46   16.16
  -1   9  16  267.67   15.51
   1  -9 -16  237.86   22.13
   1  -9 -16  245.74   15.30
  -1   9  16  245.35   15.92
   1  -9 -15   47.00    5.20
   1  -9 -15   62.81   14.81
  -1   9  15   50.32    6.21
  -1   9  15   54.23    5.59
  -1   9  15   58.86    9.00
  -1   9  15   46.04    6.29
  -1   9  14  389.61   20.22
  -1   9  14  319.30   20.01
   1  -9 -14  337.44   19.83
  -1   9  14  322.08   20.38
  -1   9  14  351.74   21.68
   1  -9 -14  338.62   24.95
   1  -9 -13   -5.19   12.28
  -1   9  13   -5.18    5.14
  -1   9  13  -16.04    7.79
   1  -9 -13   -0.58    3.79
  -1   9  13    3.67    3.93
   1  -9 -12  460.57   26.45
  -1   9  12  457.27   27.88
  -1   9  12  456.77   26.80
   1  -9 -12  493.54   30.34
  -1   9  12  466.05   26.54
  -1   9  11    6.06    4.43
   1  -9 -11   -1.07   11.37
   1  -9 -11    3.51    3.24
  -1   9  11    1.41    7.41
  -1   9  10   15.56    3.93
   1  -9 -10   16.53   11.48
   1  -9 -10   18.38    3.29
   1  -9  -9  170.34    9.62
   1  -9  -9  152.47   14.93
   1  -9  -9  154.78   10.21
   1  -9  -9  167.26   10.50
  -1   9   9  174.81    9.75
  -1   9   8    5.78    1.48
   1  -9  -8   -0.19    3.39
   1  -9  -8   -1.06    2.77
   1  -9  -8    7.16    9.77
   1  -9  -7    6.52    2.59
   1  -9  -7   -0.46    9.68
   1  -9  -7    8.07    3.31
  -1   9   7    4.43    1.57
   1  -9  -6 1757.72  102.98
   1  -9  -6 1851.03  104.72
  -1   9   6 1891.23  102.85
   1  -9  -6 1764.18  103.08
   1  -9  -5    2.67    3.82
   1  -9  -5   -5.72    9.49
  -1   9   5   -2.48    8.06
  -1   9   5    0.67    0.90
   1  -9  -5    1.08    2.35
  -1   9   4  192.15   15.71
  -1   9   4  223.53   12.49
   1  -9  -4  220.96   12.76
  -1   9   4  209.35   12.73
   1  -9  -4  234.71   13.52
  -1   9   3   17.96    1.54
   1  -9  -3   28.49    4.37
   1  -9  -3   21.41    2.21
  -1   9   3   11.20    2.19
   1   9  -3   17.87    6.50
  -1   9   3    6.11    8.63
   1  -9  -2   73.15    6.27
  -1  -9   2   69.01    3.93
   1   9  -2   65.45    7.18
  -1   9   2   68.25    9.16
   1  -9  -2   68.26    4.23
  -1   9   2   55.15    4.33
  -1   9   1   94.68    9.97
  -1  -9   1   96.34    5.46
  -1   9   1   89.96    5.69
  -1  -9   1   90.16    8.22
   1   9  -1   97.36    5.49
   1  -9  -1   92.41    7.42
   1  -9  -1   85.09    5.68
   1   9  -1   98.52    7.48
   1  -9   0 2242.80  127.68
   1  -9   0 2328.96  128.37
  -1  -9   0 2187.69  128.28
  -1  -9   0 2378.72  127.64
  -1   9   0 2176.51  128.82
   1   9   0 2254.23  128.11
   1   9   0 2209.23  127.63
   1   9   1  387.62   22.20
   1  -9   1  396.34   22.23
   1   9   1  401.91   22.81
  -1  -9  -1  396.84   23.00
   1  -9   1  379.55   23.52
   1   9   2  147.73   11.69
   1  -9   2  131.60   10.25
   1   9   2  141.21    8.57
   1   9   2  128.75    7.70
  -1  -9  -2  137.92    8.73
   1   9   3   28.66    2.44
   1   9   3   23.47    4.00
  -1  -9  -3   25.68    3.98
  -1  -9  -4   16.73    4.11
   1   9   4   22.64    2.54
  -1  -9  -5  186.06   13.02
  -1  -9  -5  221.51   12.70
  -1  -9  -5  209.57   16.14
   1   9   5  232.56   12.67
  -1  -9  -6  589.91   34.02
  -1  -9  -6  602.61   33.87
  -1  -9  -6  627.56   36.14
  -1  -9  -7    9.96    8.97
  -1  -9  -7    0.23    2.05
  -1  -9  -7    1.05    2.73
  -1  -9  -8   77.92   11.62
   1   9   8   86.81   10.35
  -1  -9  -8   75.92    4.95
  -1  -9  -8   71.43    5.27
   1   9   9   84.40    6.00
   1   9   9   69.79   10.65
  -1  -9  -9   80.90    5.31
  -1  -9  -9   71.13   12.53
   1   9  10   10.14    8.19
  -1  -9 -10   16.69    2.74
   1   9  10   16.64    4.07
  -1  -9 -10    0.52   10.46
   1   9  11   85.01    6.38
   1   9  11   83.73   10.34
  -1  -9 -11   80.52    5.17
   1   9  11   79.25    5.40
   1   9  11   70.48    4.38
  -1  -9 -11   85.23   13.51
   1   9  12   75.12    5.83
   1   9  12   67.33    5.10
  -1  -9 -12   61.48    4.95
   1   9  12   72.27    9.83
  -1  -9 -12   64.94    3.89
  -1  -9 -12   76.47   13.46
   1   9  13    7.16    4.75
  -1  -9 -13    3.82    1.39
   1   9  13   -2.14    7.82
  -1  -9 -13    2.36    3.19
   1   9  13   -0.49    3.36
  -1  -9 -13   12.03   13.12
  -1  -9 -14  501.79   31.73
   1   9  14  484.84   27.18
  -1  -9 -14  466.24   26.73
   1   9  14  517.03   29.08
  -1  -9 -14  484.15   27.10
   1   9  14  474.60   27.58
  -1  -9 -15   37.58    2.78
  -1  -9 -15   21.64   13.60
   1   9  15   37.52    8.93
   1   9  15   31.99    6.25
   1   9  15   31.84    4.63
   1   9  16   89.64    7.77
   1   9  16   72.40   10.62
   1   9  16   83.88    6.68
  -1  -9 -16   64.35   16.14
   1   9  17    9.35    6.15
   1   9  17    5.74    4.96
   1   9  17   10.04    9.11
  -1  -9 -17    7.12   16.66
   1   9  18   50.93    9.80
   1   9  18   71.26    8.22
   1   9  18   53.46    6.41
  -1  -9 -18   63.13   17.79
   1   9  19   68.90    6.79
  -1   9 -19   52.78    5.41
   1   9  19   59.80    7.91
   1   9  19   71.28   10.58
  -1  -9 -19   74.18   19.32
   1   9  20    0.27    9.81
   1   9  20    5.88    7.62
  -1  -9 -20  -10.44   18.84
  -1   9 -20    8.39    7.93
   1   9  20    9.05    6.24
  -1   9 -20    8.98    4.41
  -1   9 -21    4.07    8.54
   1   9  21    7.95    6.71
  -1   9 -21   -5.12    4.77
   1   9  21   -0.80    8.00
   1   9  21   -2.22   10.53
   1   9  22  413.40   24.73
  -1   9 -22  461.30   25.32
  -1  -9 -22  379.35   22.85
  -1  -9 -22  326.02   32.87
  -1   9 -22  396.38   23.18
   1   9  22  447.00   24.09
   1   9  23   -3.79    9.74
  -1   9 -23    3.38    9.99
  -1  -9 -23    2.19    3.73
   1   9  23    0.90    7.37
  -1   9 -23    5.41    4.87
  -1  -9 -23  -26.09   22.33
   1   9  24    1.10    7.82
  -1   9 -24   13.21    4.93
   1   9  24   14.02    9.92
  -1   9 -24    9.68   10.85
  -1  -9 -24   11.22    3.97
   1  -9  24   22.37    9.77
   1   9  25    9.83   11.47
  -1   9 -25   -6.29   12.56
   1   9  25   -2.70   10.66
   1   9  25    5.74    7.71
  -1   9 -25   -4.03    5.23
  -1  -9 -25    7.13    4.40
   1  -9  25    9.63   10.21
  -1  -9 -25  -10.60   24.48
   1   9  26   33.60   12.54
   1   9  26   52.17   12.04
   1   9  26   38.30    8.60
  -1   9 -26   23.03    5.59
   1  -9  26   55.71   11.03
  -1  -9 -26   39.83   24.91
  -1  -9 -26   23.24    4.94
  -1  -9 -27  -13.36   26.03
   1   9  27   -2.69   11.80
  -1   9 -27  -31.02   14.24
   1  -9  27   -2.88   11.11
  -1   9 -27    2.59    5.23
   1   9  27  -15.08    8.61
   1   9  28  104.39   11.10
   1  -9  28  106.60   13.37
   1   9  28  104.27   14.23
   1 -10 -28   -3.41   28.77
   1  10 -28   -6.97   15.31
  -1  10  28   15.83   13.59
  -1  10  28    6.87   10.12
  -1 -10  28   12.12   11.63
   1 -10 -27  176.40   31.21
  -1 -10  27  146.79   13.84
   1  10 -27  124.04   15.90
   1  10 -27  125.17    9.65
  -1  10  27  142.05   12.54
  -1  10  27  138.39   15.21
   1 -10 -26  150.33   28.14
  -1  10  26  139.00   12.67
   1  10 -26  108.22   14.81
  -1 -10  26  100.56   13.20
   1  10 -26  116.75    9.13
  -1  10  26  133.44   14.51
  -1  10  26  136.38   11.64
  -1  10  25  149.74   15.38
  -1 -10  25  175.99   14.69
  -1  10  25  191.64   13.47
   1 -10 -25  208.33   29.06
   1  10 -25  143.84   16.17
  -1  10  25  190.38   14.21
   1  10 -25  171.25   11.49
  -1  10  24    5.59    9.07
  -1  10  24    8.75   10.64
   1  10 -24    4.98   10.68
  -1  10  24   -5.79    8.27
  -1 -10  24   19.91    9.41
  -1  10  23   11.93   10.00
  -1 -10  23   -4.11    8.50
  -1  10  23    2.12    7.66
   1  10 -23    7.65   10.12
  -1  10  23   10.22    8.73
   1 -10 -23   -0.95   23.06
  -1  10  22   11.81    7.03
  -1 -10  22   12.56    7.77
  -1  10  22    9.01    8.32
   1 -10 -22   19.04   21.85
  -1  10  22   24.60    9.73
   1 -10 -21  -13.00   20.96
  -1  10  21    5.61    7.48
  -1  10  21   -8.15    6.92
  -1  10  21   -6.51    8.73
  -1  10  20   -0.83    7.84
  -1  10  20   11.46    7.31
   1 -10 -20   -5.84   19.83
  -1  10  20   -7.89   10.10
  -1  10  20   10.33    6.53
  -1  10  19    6.88    6.61
  -1  10  19    7.89    7.96
  -1  10  19   -0.29    9.90
  -1  10  19    8.24    6.04
   1 -10 -19   16.87   17.93
   1 -10 -18  148.77   10.05
   1 -10 -18  144.67   20.72
  -1  10  18  150.40   10.54
  -1  10  18  131.42   13.07
  -1  10  18  151.15   11.55
  -1  10  18  135.65   10.24
  -1  10  17  488.63   30.42
  -1  10  17  465.53   29.46
   1 -10 -17  460.93   34.34
  -1  10  17  473.03   28.91
   1 -10 -17  511.89   28.81
  -1  10  17  545.21   29.07
  -1  10  16   11.57    5.27
  -1  10  16   18.26    5.40
   1 -10 -16    9.16   15.47
  -1  10  16    7.63    8.74
  -1  10  16    3.91    5.81
   1 -10 -16   13.49    4.92
  -1  10  15   83.36    7.23
  -1  10  15   66.93    6.96
  -1  10  15   69.14    9.69
   1 -10 -15   74.25   16.31
   1 -10 -15   89.88    6.40
  -1  10  15   64.51    6.34
   1 -10 -14   19.91    4.02
  -1  10  14   23.50    5.39
  -1  10  14   15.24    8.87
  -1  10  14   16.49    4.61
  -1  10  13   -2.16    5.17
   1 -10 -13   10.78   13.29
  -1  10  13   -6.99    7.49
   1 -10 -13   -4.50    3.87
   1 -10 -12  747.11   51.01
  -1  10  12  832.80   48.06
  -1  10  12  801.26   49.09
   1 -10 -12  870.53   47.76
   1 -10 -11  916.23   54.42
  -1  10  11  934.05   52.59
  -1  10  11  941.77   51.62
   1 -10 -11  896.04   50.98
   1 -10 -11  966.78   51.34
   1 -10 -10  372.54   20.92
  -1  10  10  358.38   20.28
   1 -10 -10  376.75   25.01
   1 -10 -10  347.24   20.64
   1 -10  -9   39.98    4.38
  -1  10   9   55.82    3.48
   1 -10  -9   39.80   11.28
   1 -10  -9   59.85    4.99
   1 -10  -8  127.98   14.19
   1 -10  -8  138.73    8.63
  -1  10   8  139.99    8.15
   1 -10  -8  144.86    8.95
  -1  10   7   35.26    2.68
   1 -10  -7   53.02   11.48
   1 -10  -7   28.66    3.55
   1 -10  -7   34.10    4.12
   1 -10  -6  227.42   13.80
  -1  10   6  217.95   13.01
  -1  10   6  218.04   12.77
   1 -10  -6  245.77   13.25
   1 -10  -6  190.96   17.40
  -1  10   5 1344.59   78.87
  -1  10   5 1380.45   78.70
   1 -10  -5 1411.99   79.34
  -1  10   5 1294.51   80.47
   1 -10  -5 1577.10   78.94
   1  10  -4  272.39   18.81
  -1  10   4  302.24   16.69
  -1  10   4  298.48   16.93
   1 -10  -4  286.04   17.67
  -1  10   4  286.25   20.11
   1 -10  -4  278.01   16.92
  -1 -10   3  674.46   36.79
  -1  10   3  653.74   36.80
   1 -10  -3  619.02   37.59
  -1  10   3  618.75   36.93
  -1  10   3  665.24   39.20
   1 -10  -3  670.70   36.91
  -1  10   3  599.87   37.39
   1  10  -3  623.38   38.01
  -1 -10   2   -0.23    5.62
   1 -10  -2    6.14    4.90
  -1  10   2    9.82    2.39
   1  10  -2   20.10    5.70
  -1 -10   2   19.80    1.50
   1 -10  -2   12.76    2.10
  -1  10   2    4.59    8.61
   1 -10  -1   52.94    6.77
  -1  10   1   60.37    4.11
   1 -10  -1   57.83    3.98
  -1 -10   1   61.03    7.18
   1  10  -1   63.74    3.79
   1  10  -1   66.24    6.61
  -1 -10   1   63.24    3.75
  -1  10   1   43.91    8.84
   1 -10   0    3.41    6.07
  -1  10   0    4.89    8.07
  -1 -10   0    5.11    1.41
   1  10   0    5.14    4.92
   1  10   0    1.98    1.46
  -1 -10   0    2.96    5.36
   1 -10   0    0.90    1.73
   1  10   1  747.23   43.85
   1  10   1  845.56   44.42
   1 -10   1  786.98   45.02
   1 -10   1  819.38   43.88
  -1 -10  -1  677.63   44.57
  -1 -10  -2   46.21    4.93
   1 -10   2   31.12    2.62
   1  10   2   25.64    8.60
   1  10   2   31.43    2.58
   1 -10   2   32.38    6.56
   1  10   2   34.07    4.37
   1 -10   3  -10.78    7.12
  -1 -10  -3    3.66    4.00
   1  10   3   -3.21    1.77
   1  10   3   -4.86    3.58
   1  10   4  842.32   46.69
  -1 -10  -4  782.28   47.16
  -1 -10  -5 1394.95   81.08
   1  10   5 1485.68   81.00
  -1 -10  -5 1404.97   81.35
  -1 -10  -6   31.31   10.78
  -1 -10  -6   43.75    5.22
  -1 -10  -6   44.74    4.27
  -1 -10  -6   47.27    3.65
  -1 -10  -7    5.00   10.60
  -1 -10  -7    4.89    3.05
  -1 -10  -7    3.28    2.24
   1  10   7    3.22    3.45
  -1 -10  -8  516.23   28.68
  -1 -10  -8  500.26   28.85
  -1 -10  -8  438.80   31.69
   1  10   8  491.07   31.27
  -1 -10  -9  292.04   23.05
   1  10   9  357.44   22.50
  -1 -10  -9  335.83   19.15
   1  10  10   38.07    4.67
  -1 -10 -10   37.89   12.14
  -1 -10 -10   36.95    3.49
   1  10  10   36.94   10.68
   1  10  11 2114.13  113.80
  -1 -10 -11 1845.06  116.24
   1  10  11 1962.52  114.23
  -1 -10 -11 1825.83  113.96
   1  10  11 2156.29  115.65
   1  10  12  178.80   14.37
  -1 -10 -12  155.46   17.32
   1  10  12  180.24   10.02
   1  10  12  166.95   11.29
  -1 -10 -12  160.88   10.52
  -1 -10 -13    0.71    0.96
   1  10  13    1.01    3.51
   1  10  13    0.13    5.25
  -1 -10 -13    3.16    3.25
  -1 -10 -13   -2.54   13.22
   1  10  13   11.64    9.46
  -1 -10 -14   90.38    5.30
  -1 -10 -14   92.14    6.42
   1  10  14   90.61    6.84
   1  10  14  105.08   11.16
   1  10  14   83.01    7.52
  -1 -10 -14   88.70   16.42
  -1 -10 -15   -0.55    3.94
  -1 -10 -15    6.31    1.62
   1  10  15    5.12    9.34
   1  10  15    5.85    4.43
  -1 -10 -15   10.34   16.02
   1  10  15    0.45    5.66
  -1 -10 -16    0.72   17.03
   1  10  16   14.70    9.53
  -1 -10 -16    5.45    1.98
   1  10  16    9.25    4.67
   1  10  16    8.26    6.40
   1  10  17  538.72   30.23
   1  10  17  557.31   30.73
  -1 -10 -17  515.04   29.55
   1  10  17  533.57   32.09
  -1 -10 -17  544.76   36.23
   1  10  18   99.71    8.04
   1  10  18  102.18   11.56
  -1 -10 -18  102.62    6.26
   1  10  18   96.90    9.43
  -1 -10 -19   28.21   19.32
   1  10  19   15.46   10.38
  -1  10 -19   20.68    4.56
   1  10  19   10.30    5.73
  -1 -10 -19   14.53    2.77
   1  10  19   10.05    7.74
   1  10  20   -7.63    8.05
   1  10  20    0.29   10.38
  -1 -10 -20  -14.22   19.77
   1  10  20    3.42    6.20
  -1 -10 -20    7.07    2.74
  -1  10 -20    1.57    4.65
   1  10  21   -1.85    8.52
  -1 -10 -21   -0.87   20.26
  -1 -10 -21    1.62    3.03
  -1  10 -21    5.35    8.52
  -1  10 -21   10.65    5.19
   1  10  21    9.90    6.58
   1  10  21    6.74   10.98
  -1  10 -22    1.33    5.04
  -1  10 -22   19.10    9.42
  -1 -10 -22   -8.99   22.19
  -1 -10 -22   -2.84    3.34
   1  10  22   14.23   11.35
   1  10  22   19.70    9.25
   1  10  22    3.24    6.75
   1  10  23  124.44   11.62
   1  10  23  115.41    9.63
  -1  10 -23   99.37    8.14
  -1  10 -23  118.73   12.12
  -1 -10 -23  141.36   24.96
  -1 -10 -23  100.72    7.16
   1  10  23  151.08   12.47
   1  10  24   40.66   10.48
  -1 -10 -24   38.49   23.64
  -1 -10 -24   36.92    4.35
  -1  10 -24   32.94    5.79
  -1  10 -24   48.19   11.18
   1  10  24   49.93   10.43
   1  10  24   30.59    8.58
   1 -10  25   96.81   11.87
  -1  10 -25   59.84   12.87
  -1  10 -25   70.96    6.94
   1  10  25   74.39   11.85
  -1 -10 -25   51.67   25.05
   1  10  25   96.30   13.86
   1  10  25   91.65    9.11
  -1 -10 -25   77.25    6.07
   1  10  26   93.30   10.21
  -1  10 -26   89.37   13.99
   1  10  26  118.58   13.95
  -1 -10 -26   92.10    6.85
   1 -10  26   90.41   12.46
  -1  10 -26   80.11    7.86
   1  10  26  100.95   13.23
  -1  10 -27   29.57   14.82
   1  10  27   37.80    9.50
  -1  10 -27   25.65    6.04
   1 -10  27   44.12   11.81
  -1 -10 -27   32.75   26.80
   1  10  27   46.96   12.54
   1  11 -27  145.72   10.39
   1  11 -27  141.84   16.25
  -1 -11  27  162.75   14.53
  -1  11  27  145.67   12.89
  -1  11  27  137.11   15.82
   1 -11 -27  102.94   30.52
   1  11 -26    4.58    5.77
  -1  11  26    0.84   12.28
  -1  11  26   -2.77   10.13
  -1 -11  26    2.90   10.28
   1  11 -26    2.51   12.18
   1 -11 -26  -10.96   28.17
  -1  11  26   -0.57    9.09
   1  11 -25    6.11    5.73
  -1  11  25   -8.57   10.02
  -1 -11  25   -1.51   10.61
   1 -11 -25   11.65   26.24
   1  11 -25    2.61   11.40
  -1  11  25   19.78   11.05
  -1  11  25   19.03    8.24
  -1  11  24   14.19    9.21
   1  11 -24   32.70   10.71
  -1 -11  24   18.08   10.26
  -1  11  24   26.36   10.59
  -1  11  24   38.91    8.44
  -1 -11  23   24.19    9.56
  -1  11  23    6.11    9.96
   1  11 -23   25.36   10.63
  -1  11  23   10.14    7.93
   1 -11 -23   29.56   24.78
  -1  11  23   13.82    8.64
   1 -11 -22  151.40   25.70
  -1  11  22  129.13   11.05
  -1  11  22  129.93   12.43
  -1  11  22  155.23   11.70
  -1  11  21  446.00   27.39
  -1  11  21  472.40   28.00
  -1  11  21  460.00   28.99
   1 -11 -21  436.65   36.18
  -1  11  21  454.40   27.07
  -1  11  20    5.99    6.80
   1 -11 -20   16.77   21.14
  -1  11  20    4.78    6.55
  -1  11  20    7.70   10.97
  -1  11  20   12.98    8.05
  -1  11  19   30.37    7.02
   1 -11 -19  -15.31   19.05
  -1  11  19   -0.20    8.15
  -1  11  19   11.64    6.17
  -1  11  19   34.05   10.75
  -1  11  18  112.14    9.01
   1 -11 -18  104.47   19.15
  -1  11  18  123.42    9.46
  -1  11  18  124.30   10.31
   1 -11 -18  103.52    8.72
  -1  11  18  111.06   12.70
   1 -11 -17   81.97   17.99
  -1  11  17   92.04    8.46
  -1  11  17   95.81    8.06
   1 -11 -17   97.84    7.78
  -1  11  17   97.46    9.00
  -1  11  17   91.97   11.53
  -1  11  16  131.51   10.44
   1 -11 -16  133.27   19.22
   1 -11 -16  134.03    9.09
  -1  11  16  134.59    9.33
  -1  11  16  142.75   12.92
  -1  11  15 1224.65   69.70
  -1  11  15 1258.37   70.73
   1 -11 -15 1157.05   72.89
   1 -11 -15 1227.00   69.32
   1 -11 -14   79.14   14.66
  -1  11  14   79.93    9.77
  -1  11  14   66.88    7.45
   1 -11 -14   69.23    6.02
  -1  11  13   52.77    6.27
   1 -11 -13   47.38    2.91
  -1  11  13   45.28    9.58
   1 -11 -13   54.60    4.83
  -1  11  12   28.80    9.04
   1 -11 -12   17.56    3.94
   1 -11 -11   75.67    6.30
  -1  11  11   61.48   10.60
   1 -11 -11   72.07    5.58
  -1  11  11   70.82    4.46
   1 -11 -11   64.92   14.39
   1 -11 -10  112.20    7.64
  -1  11  10  108.91    6.57
   1 -11 -10   90.94   15.13
   1 -11 -10  114.17    7.41
  -1  11   9    0.56    1.82
   1 -11  -9    1.00    3.14
   1 -11  -9    4.61    3.70
  -1  11   8    6.09    1.93
   1 -11  -8    3.35    3.65
   1 -11  -8    7.41    3.15
  -1  11   8    3.17    3.29
   1 -11  -7  573.82   33.43
  -1  11   7  564.36   33.26
  -1  11   7  600.64   33.06
   1 -11  -7  529.68   33.83
   1 -11  -7  613.76   33.28
   1 -11  -7  542.43   36.23
   1 -11  -6    8.77    4.90
  -1  11   6    2.14    9.86
   1 -11  -6   10.26    3.61
   1  11  -6    9.11    7.99
  -1  11   6    6.92    3.01
   1 -11  -6   20.03   11.64
   1 -11  -5 1561.36   92.70
  -1  11   5 1638.59   92.05
   1  11  -5 1438.08   93.29
  -1  11   5 1648.85   93.96
  -1  11   5 1519.16   92.23
   1 -11  -5 1879.32   92.31
   1 -11  -4   73.07    5.58
   1  11  -4   78.11    8.73
   1 -11  -4   77.34    7.16
  -1  11   4   80.27    5.63
  -1  11   4   87.75    5.08
  -1 -11   4   91.90    5.10
  -1  11   4   75.32   11.65
  -1  11   3   47.23    3.85
  -1  11   3   51.29    3.23
  -1  11   3   41.66   10.04
  -1  11   3   34.65    5.41
  -1 -11   3   53.84    3.20
   1 -11  -3   45.83    3.66
   1 -11  -3   47.59    6.05
   1  11  -3   55.89    7.41
  -1  11   2   27.75    5.32
  -1 -11   2   34.99    2.39
   1 -11  -2   37.51    2.93
  -1 -11   2   35.85    7.64
  -1  11   2   32.36    3.15
   1 -11  -2   28.84    5.86
   1  11  -2   26.55    6.10
  -1  11   2   44.35    9.56
  -1 -11   1   20.94    1.88
  -1  11   1   12.49    9.17
   1 -11  -1   25.13    2.51
  -1  11   1   19.63    2.47
  -1 -11   1   24.25    6.66
   1  11  -1   22.65    5.84
   1 -11  -1   20.06    6.31
   1  11  -1   20.08    2.01
   1 -11   0  192.40   12.49
  -1 -11   0  173.17   10.28
   1 -11   0  178.94   10.38
   1  11   0  178.40   10.28
  -1  11   0  166.43   13.81
  -1 -11   0  198.28   12.50
   1  11   0  190.27   11.76
   1 -11   1 2079.84  106.65
  -1 -11  -1 2040.48  106.36
   1  11   1 1817.46  105.56
   1 -11   1 1846.84  105.58
   1  11   1 1991.18  106.07
   1 -11   2  182.71   10.20
   1 -11   2  174.54   12.96
   1  11   2  173.25   14.33
   1  11   2  169.03   10.16
   1  11   2  171.01   11.19
  -1 -11  -2  174.62   11.63
   1  11   3  163.62    9.79
   1  11   3  169.24   14.78
  -1 -11  -3  176.39   10.88
   1 -11   3  171.81   12.90
   1  11   3  171.34   10.71
   1  11   4   54.01    3.94
  -1 -11  -4   53.04    5.59
  -1 -11  -5 1240.63   74.54
   1  11   5 1343.64   74.10
   1  11   6   44.00    4.03
  -1 -11  -6   55.49    5.68
  -1 -11  -6   44.66    4.37
  -1 -11  -7  317.87   20.20
  -1 -11  -7  303.52   23.30
  -1 -11  -7  335.64   19.67
  -1 -11  -7  316.52   19.44
  -1 -11  -8  398.68   24.69
   1  11   8  382.91   27.99
  -1 -11  -8  436.97   28.24
  -1 -11  -8  431.91   24.52
   1  11   8  471.47   24.77
   1  11   9    7.61    3.90
  -1 -11  -9    4.32   11.47
  -1 -11  -9   10.98    2.77
  -1 -11  -9   11.63    3.65
  -1 -11 -10  176.46   10.67
  -1 -11 -10  204.94   17.09
   1  11  10  196.00   15.86
   1  11  11   86.03   12.27
  -1 -11 -11   84.35   14.56
  -1 -11 -11   83.86    5.78
  -1 -11 -12  129.02    8.33
   1  11  12  137.88   13.58
   1  11  12  134.81    7.63
   1  11  12  121.33    9.11
  -1 -11 -13    7.81    3.55
   1  11  13   16.49    9.68
   1  11  13    5.33    5.29
   1  11  13    8.05    1.39
   1  11  14   33.56    5.95
  -1 -11 -14   38.05   15.61
  -1 -11 -14   23.71    4.03
   1  11  14   33.76   10.25
  -1 -11 -15  715.93   41.49
   1  11  15  758.99   43.47
   1  11  15  753.47   42.08
  -1 -11 -15  721.78   46.47
  -1 -11 -16  143.93    8.31
   1  11  16  151.33   11.00
   1  11  16  157.07   13.68
  -1 -11 -16  140.27   20.07
   1  11  16  149.35    9.74
   1  11  17   89.01   11.76
  -1 -11 -17   85.94    5.21
  -1 -11 -17  113.01   19.75
   1  11  17   84.25    7.35
   1  11  17   96.20    8.56
   1  11  18  150.81   13.77
   1  11  18  155.79   11.18
  -1 -11 -18  133.66    8.10
  -1 -11 -18  132.61   21.85
   1  11  18  158.82    9.87
  -1 -11 -19    4.82    2.17
  -1 -11 -19   -6.70   19.24
   1  11  19    0.58    6.97
   1  11  19   13.57    6.08
  -1  11 -19    7.58    4.75
   1  11  19    3.82   10.29
  -1  11 -20    2.99    4.90
   1  11  20   -6.74    6.37
   1  11  20   -4.42   11.30
  -1 -11 -20   -4.34   19.91
   1  11  20    4.50    7.53
  -1 -11 -20    1.25    2.44
   1  11  20    0.20    8.49
  -1 -11 -21  214.28   13.47
  -1  11 -21  253.02   16.24
  -1 -11 -21  222.17   26.99
   1  11  21  263.75   15.17
  -1  11 -21  235.72   14.38
   1  11  21  293.11   16.41
   1  11  21  263.10   18.31
   1  11  21  253.63   16.31
   1  11  22  110.89   10.49
  -1 -11 -22   74.64    5.65
   1  11  22   76.27    8.82
  -1 -11 -22  133.04   23.52
  -1  11 -22   90.80    7.02
  -1  11 -22   95.19   10.32
   1  11  22  100.15   12.95
   1  11  22   83.92   10.93
   1  11  23   46.19    8.24
  -1 -11 -23   49.97   23.59
   1  11  23   45.53   10.68
  -1  11 -23   33.52   10.23
  -1  11 -23   40.86    5.80
  -1 -11 -23   36.52    4.02
   1  11  24    6.46    7.61
   1  11  24   20.00   10.81
  -1 -11 -24   26.79   23.83
  -1  11 -24   18.69    5.51
  -1  11 -24   22.65   11.15
   1  11  24   27.14   10.47
  -1 -11 -24   15.53    3.56
  -1 -11 -25   34.75   25.63
  -1 -11 -25    5.12    3.78
  -1  11 -25   -5.70   11.69
   1  11  25    7.73   11.38
  -1  11 -25    2.37    5.59
   1  11  25    2.31    7.86
   1  11  25   19.48   10.79
   1  11  26   81.74   12.33
  -1  11 -26   58.17   13.37
   1  11  26   73.95   13.10
  -1 -11 -26   37.83   27.37
   1  11  26   55.57    9.46
  -1  11 -26   66.18    6.75
   1 -11  26   63.86   11.51
  -1  11 -27   19.33   13.46
   1 -11  27   47.41   11.97
   1  11  27   46.42   12.66
   1  11  27   14.09    9.13
  -1  11 -27   22.70    6.22
  -1 -11 -27   26.99   28.44
  -1  12  27   20.89    9.33
   1 -12 -27   47.67   30.10
  -1  12  27   17.92   13.58
  -1 -12  27   24.93   11.66
   1  12 -27    3.58    6.46
   1  12 -27   -3.31   13.37
  -1  12  26  213.18   16.88
   1  12 -26  194.71   16.62
  -1  12  26  207.84   14.58
   1  12 -26  157.60   12.25
  -1 -12  26  194.35   15.28
  -1  12  26  190.90   14.84
   1 -12 -25   -2.82    3.50
  -1  12  25   12.71   11.80
   1  12 -25   -0.79    6.14
  -1 -12  25   -5.08   10.32
   1 -12 -25  -34.99   26.88
  -1  12  25    1.99    9.09
  -1  12  25   -3.29    9.46
   1  12 -25    0.28   11.60
   1  12 -24   63.08   11.91
  -1  12  24   73.29   10.24
  -1  12  24   49.73   11.73
   1 -12 -24   76.29   26.27
   1 -12 -24   60.91    4.84
  -1  12  24   66.66    9.71
  -1 -12  24   53.95   11.04
  -1  12  23    1.33    7.85
  -1  12  23    3.37    8.82
   1 -12 -23  -24.60   25.57
  -1  12  23   -8.68   10.41
  -1  12  22   22.41    8.59
  -1  12  22   31.49   12.98
  -1  12  22   29.18    9.94
   1 -12 -22   -6.93   23.40
  -1  12  22   29.10    7.88
  -1  12  21   13.84    8.78
   1 -12 -21    1.91   22.62
  -1  12  21   13.39    7.17
  -1  12  21    7.61    8.05
  -1  12  21   18.92   11.65
  -1  12  20   38.55    9.18
  -1  12  20   41.99   11.88
  -1  12  20   28.11    7.55
   1 -12 -20   21.26   21.29
  -1  12  19   88.39    9.66
  -1  12  19  109.16   12.94
   1 -12 -19   74.49    7.54
  -1  12  19   91.26    8.45
   1 -12 -19   87.98   20.60
  -1  12  18  149.95   11.63
   1 -12 -18  170.59   20.90
  -1  12  18  149.32   14.19
   1 -12 -18  143.61   10.23
   1 -12 -17    9.11   18.06
  -1  12  17   14.52   10.67
  -1  12  17   -8.05    7.56
   1 -12 -17   -4.89    5.26
   1 -12 -16  301.83   17.46
   1 -12 -16  359.18   18.38
  -1  12  16  335.89   21.36
  -1  12  16  342.92   19.40
   1 -12 -16  315.20   27.06
  -1  12  15  104.26   11.58
  -1  12  15   96.59    8.84
   1 -12 -15   75.94    6.86
   1 -12 -15  116.93   18.19
   1 -12 -14   65.34    5.75
  -1  12  14   74.80   11.15
   1 -12 -14   79.27   17.11
  -1  12  13   18.04    8.82
   1 -12 -13    5.71   14.94
   1 -12 -13   18.50    4.33
   1 -12 -12  221.61   13.24
  -1  12  12  217.99   16.77
   1 -12 -12  198.76   19.12
  -1  12  11   14.18    2.18
   1 -12 -11   18.43    4.83
   1 -12 -11   13.89    3.79
   1 -12 -10  766.67   48.17
   1 -12 -10  794.44   44.51
   1 -12 -10  803.78   44.71
  -1  12  10  815.30   44.24
  -1  12  10  687.84   44.51
   1 -12  -9  281.03   23.13
  -1  12   9  313.70   18.22
  -1  12   9  308.87   17.82
   1 -12  -9  309.82   18.40
   1 -12  -9  324.40   18.20
   1 -12  -8   -5.59    5.74
   1 -12  -8    1.85    3.58
  -1  12   8   -1.93    2.32
  -1  12   8   -4.34    3.29
   1 -12  -8   -2.87    3.28
   1 -12  -7  107.93    9.14
   1  12  -7  109.64   12.02
   1 -12  -7  114.34    7.66
  -1  12   7  117.33    7.65
   1 -12  -7  127.75    8.04
   1 -12  -7  127.43   13.83
  -1  12   7  118.13    7.19
  -1  12   6  315.72   17.74
   1 -12  -6  313.45   18.77
  -1  12   6  271.73   21.21
   1  12  -6  302.88   20.05
  -1  12   6  305.20   17.31
   1  12  -5  120.48   11.09
   1 -12  -5  111.73    9.07
   1 -12  -5  121.66    7.73
  -1  12   5  106.29   13.54
  -1  12   5  122.25    6.99
  -1  12   5  119.80    7.62
   1 -12  -4  788.41   42.88
  -1  12   4  752.59   45.51
  -1  12   4  687.39   42.87
  -1  12   4  779.22   42.67
  -1 -12   4  751.27   42.68
   1 -12  -4  789.37   43.65
   1  12  -4  722.63   44.27
  -1 -12   3   27.30    2.26
  -1  12   3   33.18    5.84
   1 -12  -3   29.12    6.30
   1  12  -3   35.20    7.73
   1 -12  -3   31.87    2.98
  -1  12   3   34.96    3.34
  -1  12   3   18.83   10.75
  -1  12   2  380.87   23.01
  -1  12   2  335.78   19.18
   1 -12  -2  351.16   20.49
   1  12  -2  321.81   20.72
  -1 -12   2  318.91   18.97
  -1 -12   2  369.71   21.24
  -1  12   2  353.10   20.22
   1 -12  -2  352.98   19.14
  -1  12   1  699.31   38.73
  -1  12   1  680.73   39.52
   1 -12  -1  676.78   38.70
  -1 -12   1  656.17   40.07
   1 -12  -1  720.07   39.89
   1  12  -1  676.77   39.72
  -1  12   1  631.81   41.13
  -1 -12   1  685.42   38.59
   1 -12   0    8.49    2.24
   1  12   0   12.44    1.96
  -1 -12   0   17.72    6.72
  -1 -12   0    8.53    1.98
   1  12   0    2.60    5.42
  -1  12   0    3.10    5.56
  -1  12   0    3.56    9.38
   1 -12   0   11.63    6.70
   1 -12   1   66.26    7.96
  -1 -12  -1   52.79    7.38
   1  12   1   69.59    6.43
   1  12   1   54.99    3.81
   1 -12   1   53.06    3.95
  -1  12  -2 1235.78   69.12
   1 -12   2 1237.74   69.30
   1  12   2 1173.94   69.30
  -1 -12  -2 1320.93   70.18
   1 -12   2 1198.14   70.63
   1  12   2 1073.48   71.37
   1  12   2 1320.28   69.83
   1  12   3  137.56    7.93
   1 -12   3   95.13   11.45
  -1 -12  -3  118.76    9.65
   1  12   3   99.80   13.49
   1  12   3  141.85    9.27
   1  12   4  613.78   34.74
  -1 -12  -4  612.18   35.44
   1  12   5   29.36    3.41
  -1 -12  -5   30.89    5.51
  -1 -12  -6    6.56    3.44
  -1 -12  -6    2.19    5.03
   1  12   6    7.76    2.79
  -1 -12  -7    1.91    3.06
   1  12   7    1.89    3.53
  -1 -12  -7    4.95    2.65
  -1 -12  -7    9.93    5.28
  -1 -12  -8   12.82    3.70
  -1 -12  -8   18.90    5.49
   1  12   8   19.99    3.94
  -1 -12  -8   16.60    2.94
  -1 -12  -9   31.24    4.36
   1  12   9   47.70   11.80
  -1 -12  -9   31.36    3.42
   1  12   9   40.84    4.70
  -1 -12 -10  807.98   50.44
  -1 -12 -10  844.62   50.22
  -1 -12 -10  802.32   53.20
   1  12  10  935.24   53.00
  -1 -12 -11    3.78    3.10
   1  12  11    6.70   10.87
   1  12  11   -7.27    5.30
  -1 -12 -11   -0.62   13.17
   1  12  12  257.03   12.88
  -1 -12 -12  191.98   18.83
   1  12  12  196.40   11.66
   1  12  12  213.34   17.40
  -1 -12 -12  199.16   12.14
  -1 -12 -13   52.07    4.25
   1  12  13   38.58    2.88
  -1 -12 -13   45.90   14.93
   1  12  13   43.35   10.49
   1  12  13   45.68    6.26
   1  12  14  114.30    8.95
  -1 -12 -14   96.69   17.70
   1  12  14  112.92   13.13
  -1 -12 -14  110.19    7.51
   1  12  15  199.32   16.50
  -1 -12 -15  240.87   20.93
  -1 -12 -15  193.11   12.17
   1  12  15  203.71   13.45
  -1 -12 -16  474.50   27.05
   1  12  16  436.05   29.61
  -1 -12 -16  448.56   33.51
   1  12  16  479.75   27.93
   1  12  17   -2.66    6.61
   1  12  17   -3.62   10.66
  -1 -12 -17   -2.42   18.96
   1  12  18   92.18    9.54
   1  12  18   73.23   12.83
  -1 -12 -18   93.93    5.43
  -1 -12 -18   90.44   20.49
   1  12  19   -6.22   11.26
   1  12  19   -3.15    8.12
   1  12  20   20.29    6.34
  -1 -12 -20   25.10   20.62
   1  12  20   10.15   12.39
  -1  12 -20    7.87    5.10
  -1 -12 -20   10.83    2.14
   1  12  20    3.51    8.88
  -1  12 -21   -6.13    5.23
   1  12  21    6.29    8.71
   1  12  21   -7.67   12.43
  -1 -12 -21  -11.12   22.69
   1  12  21    4.38    6.83
  -1 -12 -21    2.52    2.26
   1  12  21   -6.73   10.43
  -1 -12 -22    5.63    2.56
   1  12  22    4.94   11.89
   1  12  22   19.27    6.81
  -1  12 -22   13.84    5.74
   1  12  22   -6.82   10.07
   1  12  22    5.23    9.92
  -1 -12 -22   -8.61   23.29
  -1  12 -22   -1.50    9.03
   1  12  23   29.78    7.72
   1  12  23   10.78   10.22
  -1  12 -23   24.89    5.46
   1  12  23   17.47   12.65
  -1  12 -23   18.22   10.03
   1  12  23   29.79   10.68
  -1 -12 -23   19.79    3.05
  -1 -12 -23   53.24   24.04
  -1 -12 -24   19.32   25.64
   1  12  24   12.53   10.52
  -1 -12 -24    2.31    2.99
   1  12  24    0.95    7.88
  -1  12 -24    4.63    5.62
  -1  12 -24   -7.78   10.54
   1  12  24    5.49   10.62
   1  12  25    9.39   11.41
  -1  12 -25    3.28   11.61
   1  12  25   -0.21   10.96
  -1 -12 -25   22.98   26.46
  -1  12 -25   -1.50    6.16
   1  12  25    0.83    8.31
   1  12  26  139.06   10.77
  -1  12 -26   85.95    8.62
  -1 -12 -26   95.36   28.24
  -1  12 -26   96.81   14.41
   1  12  26  113.30   13.79
   1 -12  26  136.83   13.03
   1  12  27   18.26    9.22
   1 -12  27    4.48   11.30
  -1 -12 -27    9.88   28.24
  -1  12 -27   -3.11    6.16
   1  12  27   -5.97   12.88
  -1  13  27   53.35   14.47
   1 -13 -27   34.63   30.55
   1  13 -27   58.80    7.80
  -1 -13  27   88.31   12.38
   1  13 -27   66.03   14.08
   1  13 -26   46.64   12.91
  -1 -13  26   73.50   11.79
  -1  13  26   69.19   13.67
   1  13 -26   68.69    7.54
   1 -13 -26   38.26   29.30
   1  13 -25   28.02    6.56
  -1 -13  25   34.37   11.07
   1  13 -25   31.37   12.14
   1 -13 -25   24.77   27.52
  -1  13  25   17.79    9.90
  -1  13  25   21.39   12.12
  -1  13  24   10.93   11.27
   1 -13 -24   -4.37   26.56
   1 -13 -24    3.00    2.66
  -1  13  24   -0.19    9.61
   1 -13 -23   11.63   25.19
   1 -13 -23   10.36    2.57
  -1  13  23    6.90   10.46
  -1  13  23   37.92   13.16
  -1  13  23    8.69    9.04
  -1  13  22  134.02   11.21
  -1  13  22  157.04   15.64
   1 -13 -22  120.72    7.29
  -1  13  22  129.38   12.63
   1 -13 -21  219.87   12.62
  -1  13  21  270.44   18.57
  -1  13  21  202.23   15.32
  -1  13  21  244.75   16.22
   1 -13 -21  231.85   27.57
  -1  13  20   62.04   12.80
   1 -13 -20   42.44    2.94
   1 -13 -20   51.30    6.83
  -1  13  20   53.59    9.66
  -1  13  20   48.48    8.18
  -1  13  19    1.77   12.36
   1 -13 -19   -3.22    1.19
  -1  13  19   16.03    8.38
   1 -13 -19   -2.78   20.83
   1 -13 -19    0.91    5.92
   1 -13 -19   -0.92    1.26
  -1  13  18  -12.15   11.60
   1 -13 -18    6.34    5.75
  -1  13  18   11.01    8.03
   1 -13 -18   16.99   19.67
  -1  13  17    0.36   11.60
   1 -13 -17    7.75    5.41
   1 -13 -17   20.73   19.48
   1 -13 -16   98.24    7.59
  -1  13  16   90.81   12.65
   1 -13 -16   66.63   18.35
   1 -13 -15  738.79   42.06
   1 -13 -15  742.11   47.43
  -1  13  15  731.78   44.02
  -1  13  14   99.76   12.68
   1 -13 -14  101.90    7.53
   1 -13 -14   95.37   18.74
   1 -13 -13   28.38   14.51
  -1  13  13   57.97   11.07
   1 -13 -13   49.80    5.09
  -1  13  12   56.42    3.96
  -1  13  12   48.66    5.75
   1 -13 -12   61.20    6.54
  -1  13  12   75.70   11.57
   1 -13 -12   67.79    5.44
   1 -13 -12   50.39   16.27
  -1  13  11    0.83    2.13
  -1  13  11    2.21    4.07
   1 -13 -11    6.22   14.51
   1 -13 -11   -4.89    3.71
   1 -13 -11   -3.64    4.86
   1 -13 -10   39.03   12.95
  -1  13  10   34.89    4.14
   1 -13 -10   37.86    4.32
  -1  13  10   26.73    2.98
   1 -13 -10   34.55    5.01
   1 -13  -9  160.80   11.08
   1 -13  -9  157.31    9.50
   1 -13  -9  145.76    9.95
   1 -13  -9  136.76   16.63
  -1  13   9  140.36    9.56
  -1  13   9  155.34    9.00
   1 -13  -8  899.26   49.99
  -1  13   8  891.97   49.77
   1 -13  -8  885.32   53.21
   1 -13  -8  913.49   50.67
   1  13  -8  863.60   51.81
  -1  13   8  845.17   49.97
   1 -13  -8  874.08   50.17
   1 -13  -7 1774.40  106.45
  -1  13   7 1927.62  105.78
  -1  13   7 1891.23  105.90
   1 -13  -7 1893.45  106.09
   1  13  -7 1776.35  107.19
   1 -13  -7 1670.83  108.14
  -1  13   6  874.29   48.78
   1  13  -6  784.80   50.45
  -1  13   6  835.03   51.28
  -1  13   6  867.27   48.50
   1 -13  -6  820.69   49.51
   1 -13  -5   66.94    7.65
  -1  13   5   45.32   12.39
   1  13  -5   69.88    9.77
  -1 -13   5   65.71    4.04
   1 -13  -5   63.40    5.03
  -1  13   5   64.97    4.82
  -1  13   5   61.34    3.93
   1  13  -4   14.31    7.84
  -1  13   4   16.46    3.09
  -1 -13   4   13.64    1.92
  -1  13   4   15.04    1.80
  -1  13   4   28.55   11.84
   1 -13  -4   14.75    6.35
   1 -13  -4   14.04    2.82
  -1 -13   3  102.62    6.11
  -1  13   3  107.57   12.66
   1 -13  -3  107.18    6.46
  -1  13   3   96.92    6.60
   1 -13  -3   99.12    8.84
   1  13  -3  112.00    9.83
  -1  13   3   99.55    8.40
   1  13  -2  138.99    9.99
  -1  13   2  141.47   13.83
   1 -13  -2  118.83    7.38
  -1  13   2  121.83    7.53
   1 -13  -2  137.73   10.27
  -1 -13   2  116.36    7.12
  -1 -13   2  127.52   10.76
  -1  13   2  126.52    9.25
   1  13  -1    4.69    6.31
  -1  13   1    6.14    2.67
  -1  13   1    3.49    5.78
  -1  13   1    7.38   10.89
  -1 -13   1    7.37    1.73
  -1 -13   1   21.65    7.80
   1 -13  -1   12.01    6.87
   1 -13  -1    5.72    2.45
  -1 -13   0  718.31   38.21
  -1 -13   0  634.43   39.47
   1  13   0  689.52   38.19
   1 -13   0  611.93   39.61
   1 -13   0  645.00   38.25
  -1  13   0  674.23   39.29
   1  13   0  624.34   39.11
  -1  13   0  658.46   40.63
   1  13   1    5.29    5.46
   1  13   1   15.41    2.49
   1 -13   1    9.78    8.06
   1 -13   1   13.83    2.51
  -1  13  -1    5.20    5.96
  -1  13  -1   -0.41   10.00
  -1 -13  -1   11.50    6.37
   1  13   2  703.29   42.81
   1 -13   2  744.61   42.15
   1  13   2  808.50   45.18
   1 -13   2  726.62   43.86
   1  13   2  800.74   42.16
  -1 -13  -2  737.47   43.18
  -1 -13  -2  738.90   41.94
   1 -13   3   59.01    4.08
   1 -13   3   64.35   10.23
  -1 -13  -3   62.88    7.19
   1  13   3   52.69   11.77
   1  13   3   59.95    4.11
   1  13   3   44.33    6.32
  -1 -13  -4    3.57    5.71
   1  13   4   -4.47    2.62
   1  13   5  436.59   24.98
  -1 -13  -5  440.95   25.88
   1  13   6   41.85    4.07
  -1 -13  -6   32.97    5.96
  -1 -13  -6   47.21    4.43
  -1 -13  -7 1781.67  100.24
  -1 -13  -7 1807.71  100.80
   1  13   7 1762.34  100.27
  -1 -13  -7 1789.37  100.39
  -1 -13  -8    3.83    2.96
  -1 -13  -8    9.01   11.14
  -1 -13  -8    5.59    5.68
  -1 -13  -8    5.80    3.60
   1  13   8    1.77    3.46
  -1 -13  -9  129.98   14.62
   1  13   9  111.15    7.40
   1  13   9  116.27   14.48
  -1 -13  -9   89.79    7.30
  -1 -13  -9  102.47    8.54
  -1 -13  -9  111.79    6.86
   1  13  10   22.21    4.28
  -1 -13 -10   17.34    4.53
  -1 -13 -10   16.74    3.52
  -1 -13 -10   12.85   11.97
   1  13  10   28.58   12.45
   1  13  11   78.94   13.92
  -1 -13 -11   70.79   15.53
   1  13  11  102.68    7.29
  -1 -13 -11   84.05    6.25
  -1 -13 -12   15.56   13.48
   1  13  12   18.32    5.34
   1  13  12   20.42   11.32
   1  13  12   16.83    2.34
  -1 -13 -12   19.73    3.72
  -1 -13 -13   48.10   14.68
  -1 -13 -13   41.11    4.38
   1  13  13   38.37   12.62
   1  13  13   33.61    2.89
   1  13  13   56.70    6.68
  -1 -13 -14   10.89    3.92
  -1 -13 -14  -11.04   15.81
   1  13  14   -6.13   12.20
   1  13  14    9.37    1.81
   1  13  14    1.30    6.37
   1  13  15  511.84   33.21
   1  13  15  577.39   31.00
  -1 -13 -15  511.06   30.08
  -1 -13 -15  480.58   35.73
  -1 -13 -16  116.93   17.99
  -1 -13 -16   83.67    7.10
   1  13  16  107.80   13.40
   1  13  16  104.35    9.08
   1  13  17  118.89   13.33
  -1 -13 -17  133.33   20.50
  -1 -13 -17  108.52    8.04
   1  13  17   98.53   10.15
   1  13  18   -1.17    7.58
   1  13  18    1.14   11.88
  -1 -13 -18   17.18   20.05
   1  13  19   -1.42    8.09
  -1 -13 -19   -7.13   19.85
   1  13  19    2.24   12.09
  -1  13 -20    9.79    5.38
   1  13  20   15.90   12.69
  -1 -13 -20   13.80   21.32
   1  13  20   15.88    8.97
   1  13  21  281.60   18.31
  -1  13 -21  265.42   16.57
   1  13  21  308.28   21.04
   1  13  22  119.23   15.06
  -1  13 -22  121.04    9.05
   1  13  22  128.05   12.58
   1  13  23   -0.35   13.29
  -1  13 -23    9.66    9.67
  -1 -13 -23    8.05   23.99
  -1  13 -23   -5.64    5.97
   1  13  23    4.43    9.87
   1  13  23   -1.69   10.06
  -1  13 -24   -5.32   10.56
   1  13  24    3.38   10.37
  -1  13 -24    2.52    6.09
  -1 -13 -24    2.07   25.82
   1  13  24    6.82   10.53
   1  13  24   -1.40   13.85
   1  13  25    8.17   11.57
   1  13  25   14.58   10.82
  -1  13 -25   21.67    6.32
  -1  13 -25   24.81   11.61
  -1 -13 -25   31.92   27.15
   1  13  26   17.04   12.03
  -1  13 -26   13.71   12.12
  -1 -13 -26    1.09   28.15
  -1  13 -26   -0.89    6.19
  -1  14  26   36.59   13.43
  -1 -14  26    6.69   11.61
   1  14 -26    6.66    6.61
   1  14 -26   45.73   12.51
   1 -14 -26   11.91   30.85
   1 -14 -25   50.94   29.27
  -1  14  25   40.10   10.67
  -1  14  25   24.57   12.85
   1 -14 -24  -17.99   27.33
  -1  14  24   24.52   14.03
  -1  14  24    2.32    9.70
  -1  14  24   21.95   11.79
  -1  14  23  -12.45   13.59
  -1  14  23    4.07    8.96
  -1  14  23   -6.58   10.67
   1 -14 -23  -21.80   24.97
   1 -14 -22   34.90   25.49
  -1  14  22   25.76   10.38
  -1  14  22   36.72    9.16
  -1  14  22   44.10   13.46
  -1  14  21    1.11   12.89
   1 -14 -21  -18.44   25.09
   1 -14 -20   52.29    7.19
   1 -14 -20   27.76   23.69
  -1  14  20   63.59   12.84
  -1  14  19    2.64   11.57
   1 -14 -19    5.76   22.84
   1 -14 -19    7.15    5.94
   1 -14 -18   58.51   22.27
   1 -14 -18   49.50    6.43
  -1  14  18   47.02   12.40
   1 -14 -17  531.62   30.83
  -1  14  17  541.52   33.32
   1 -14 -17  518.62   38.14
   1 -14 -16   43.40   18.95
  -1  14  16   48.16   12.37
   1 -14 -16   32.45    5.90
  -1  14  15  202.32   16.46
   1 -14 -15  183.86   11.74
   1 -14 -15  159.22   22.12
   1 -14 -14   53.58    5.63
   1 -14 -14   54.14   17.02
  -1  14  14   45.31    6.16
  -1  14  14   51.19   11.61
  -1  14  13   16.10   11.25
   1 -14 -13   12.43   15.10
   1 -14 -13   12.62    4.64
  -1  14  13   13.19    5.10
  -1  14  12   58.90    5.67
  -1  14  12   56.88    4.22
   1 -14 -12   57.83    5.51
   1 -14 -12   61.09    6.45
  -1  14  12   40.60   11.24
   1 -14 -12   68.02   15.68
   1 -14 -11   42.24    4.73
   1 -14 -11   43.48    7.93
  -1  14  11   46.78    3.63
  -1  14  11   38.31    5.13
   1 -14 -11   41.56   14.79
   1 -14 -11   51.10    5.92
   1 -14 -10  349.84   22.64
   1 -14 -10  384.48   21.68
  -1  14  10  374.13   21.55
   1 -14 -10  366.61   21.42
   1 -14 -10  321.69   26.62
  -1  14  10  369.62   21.08
  -1  14   9   61.64    5.64
   1 -14  -9   70.31    5.85
   1 -14  -9   58.94    7.92
   1 -14  -9   51.40    5.22
  -1  14   9   69.98    4.53
   1 -14  -9   32.57   13.43
   1  14  -9   54.97   11.53
   1 -14  -8   34.50    5.18
   1 -14  -8   38.89    4.39
   1 -14  -8   40.93    7.16
  -1  14   8   33.02    4.13
  -1  14   8   36.40    3.46
   1 -14  -8   50.56   12.64
   1  14  -8   34.02   10.17
  -1  14   7   21.45    3.83
   1 -14  -7   36.92   12.45
  -1  14   7   17.18   12.40
   1 -14  -7   18.84    4.88
   1  14  -7   32.99    9.48
   1 -14  -7   22.90    6.46
  -1  14   6    2.75   12.26
   1  14  -6    2.91    8.42
   1 -14  -6    8.42    6.65
  -1  14   6    5.01    3.68
  -1  14   6   11.05    1.56
  -1  14   5 1519.78   87.59
   1  14  -5 1523.81   88.83
   1 -14  -5 1507.00   88.33
  -1  14   5 1528.53   87.35
  -1  14   5 1682.80   90.23
   1 -14  -5 1766.24   87.64
  -1 -14   5 1526.85   87.38
  -1 -14   4   60.87    4.26
  -1  14   4   69.16    5.09
   1 -14  -4   70.42    4.89
  -1  14   4   75.64    7.20
   1 -14  -4   60.94    7.69
  -1  14   4   69.16    4.23
  -1  14   4   69.02   14.07
   1  14  -4   71.43    9.56
  -1 -14   3   65.99    4.28
   1 -14  -3   67.71    8.03
  -1  14   3   77.79   12.63
   1  14  -3   64.34    8.32
  -1  14   3   73.72    7.51
   1 -14  -3   71.49    4.91
  -1  14   3   65.98    4.98
   1 -14  -2   65.51    4.40
  -1  14   2   59.66    4.55
   1 -14  -2   54.37    7.87
  -1  14   2   66.31   12.77
  -1 -14   2   56.32    9.56
  -1 -14   2   51.37    3.83
  -1  14   2   72.34    7.18
   1  14  -2   71.62    8.90
  -1  14   1   80.59    8.07
  -1 -14   1   86.36   10.03
   1 -14  -1   70.75    5.05
  -1  14   1   82.56   12.09
   1  14  -1   74.29    8.58
  -1 -14   1   72.61    4.68
   1 -14  -1   88.67    9.48
  -1  14   1   78.10    5.21
   1  14   0   51.48    7.29
  -1  14   0   59.23   11.08
  -1  14   0   62.64    7.50
   1 -14   0   39.84    3.65
  -1 -14   0   52.78    3.69
  -1 -14   0   35.26    8.82
   1 -14   0   46.43    8.49
   1  14   0   42.80    3.60
   1 -14   1    8.75    2.44
  -1  14  -1    7.53    6.19
   1 -14   1   -2.97    8.98
   1  14   1    5.92    6.20
  -1 -14  -1   16.75    6.94
  -1  14  -1    5.80    9.50
   1  14   1    4.45    2.42
   1  14   2   11.95    5.75
  -1 -14  -2   13.05    6.85
   1  14   2    7.21   11.57
   1  14   2    8.46    2.68
  -1  14  -2    3.87    6.98
   1 -14   2    6.77    2.45
   1 -14   2  -10.59    9.48
  -1 -14  -3    2.12    6.77
   1 -14   3    0.06    2.41
   1  14   3    2.78    2.63
   1  14   3  -10.36   12.38
   1  14   3   -2.08    5.25
   1 -14   3   -2.59    9.32
   1  14   4    2.31   12.64
  -1 -14  -4   10.75    6.24
   1  14   4   -2.05    3.02
   1  14   5  912.36   52.37
  -1 -14  -5  979.87   53.28
   1  14   6   -2.23    1.05
  -1 -14  -6    0.82    6.02
   1  14   6   -3.57    3.08
  -1 -14  -6   -6.14    3.70
  -1 -14  -7   30.73    4.60
   1  14   7   37.66    4.18
  -1 -14  -7   36.82    6.40
  -1 -14  -8  110.42    9.35
  -1 -14  -8  112.38    7.47
   1  14   8  124.75    7.81
  -1 -14  -8  112.12    7.95
  -1 -14  -9  280.66   19.37
   1  14   9  236.28   14.03
   1  14   9  204.56   18.73
  -1 -14  -9  261.70   15.30
  -1 -14  -9  228.67   13.82
  -1 -14  -9  227.80   14.16
  -1 -14 -10  166.56   11.84
   1  14  10  197.93   17.09
   1  14  10  179.01   10.40
  -1 -14 -10  186.62   17.16
  -1 -14 -10  147.72    9.99
  -1 -14 -10  167.71   10.62
  -1 -14 -11  101.83    7.17
  -1 -14 -11   99.04   15.43
  -1 -14 -11   97.88    9.53
  -1 -14 -11  113.88    8.07
   1  14  11  111.90   15.57
   1  14  11  120.91    7.91
   1  14  12  111.11   15.01
  -1 -14 -12  104.06    7.38
   1  14  12  115.72    8.10
  -1 -14 -12   72.32   16.12
   1  14  12  107.96    6.61
   1  14  13   23.10    2.58
   1  14  13   18.36    5.23
  -1 -14 -13   20.40    4.25
  -1 -14 -13   30.52   16.03
   1  14  14   42.66   12.93
   1  14  14   13.42    2.25
   1  14  14    9.32    6.00
  -1 -14 -14   23.75    4.27
  -1 -14 -14   38.65   16.31
   1  14  15   61.91   12.99
  -1 -14 -15   71.15    6.27
   1  14  15   82.80    7.94
  -1 -14 -16   28.59   19.38
   1  14  16   57.27    7.31
   1  14  16   51.55   13.08
  -1 -14 -16   48.81    5.67
  -1 -14 -17  430.90   26.07
   1  14  17  486.13   26.78
  -1 -14 -17  429.97   34.46
   1  14  17  462.35   29.69
  -1 -14 -18    6.96    5.30
   1  14  18   -6.97   12.61
  -1 -14 -19   37.26   22.20
   1  14  19    7.94   12.95
  -1 -14 -20   68.44   22.15
   1  14  20  100.68   14.43
   1  14  20   68.62   10.02
  -1  14 -20   73.23    7.34
   1  14  21   -1.91   13.46
  -1  14 -21   -2.62    5.95
   1  14  21    3.68    9.33
  -1 -14 -21   -4.86   23.38
   1  14  22   28.89   10.46
  -1  14 -22   24.24    6.11
   1  14  22    9.68   13.59
   1  14  23   38.13   10.39
  -1 -14 -23   37.96   25.50
   1  14  23   24.52   13.49
  -1  14 -23   31.78    6.49
  -1 -14 -24  -19.00   26.30
   1  14  24   -1.05   11.97
  -1  14 -24   10.82    5.89
  -1  14 -24    4.96   10.86
   1  14  24  -12.35   13.96
  -1  14 -25   20.22    6.42
   1  14  25   30.52   14.96
   1  14  25   19.68   11.84
  -1  14 -25   25.93   11.01
   1  14  25   17.23   10.52
  -1 -14 -25   30.19   26.69
  -1  14 -26   52.61    7.12
   1  14  26   51.85   13.23
  -1 -15  26   34.48   12.53
   1  15 -26   26.85   12.72
   1 -15 -26   12.15   30.77
   1  15 -26   31.81    7.16
  -1  15  25   -3.51   10.55
   1 -15 -25   -4.73   28.95
  -1  15  24   -5.73    9.98
   1 -15 -24  -19.58   27.60
  -1  15  24   14.59   14.32
   1 -15 -23   15.66   26.29
  -1  15  23   -3.45   14.30
  -1  15  22  176.62   17.99
   1 -15 -22  187.05   27.79
  -1  15  21   66.67   13.71
   1 -15 -21   61.17   23.82
   1 -15 -21   57.47    7.60
  -1  15  20  142.79   16.19
   1 -15 -20  111.51   25.45
   1 -15 -20  133.12   10.02
   1 -15 -19   10.91   22.31
  -1  15  19    4.01   12.96
   1 -15 -19   -0.12    6.04
   1 -15 -18   35.47   21.89
   1 -15 -18   31.56    6.38
  -1  15  18   58.10   13.44
   1 -15 -17   38.65    6.18
  -1  15  17   44.54   13.34
   1 -15 -16   84.80    7.18
  -1  15  16   58.36    7.63
  -1  15  16   90.87   13.45
   1 -15 -16   92.29   20.64
  -1  15  15   20.04    5.80
  -1  15  15   34.73   11.92
   1 -15 -15   13.91    5.30
   1 -15 -15   47.54   18.54
  -1  15  14   62.28   12.59
  -1  15  14   45.37    6.16
   1 -15 -14   50.91    5.78
   1 -15 -14   34.99   18.80
  -1  15  13   11.16    2.52
   1 -15 -13    4.13    5.86
  -1  15  13    9.83   12.42
   1 -15 -13    3.35    4.78
   1 -15 -13   10.41   15.30
  -1  15  13   19.27    5.64
   1 -15 -12   22.85    4.61
  -1  15  12   22.76    2.91
   1 -15 -12   35.47   15.57
   1 -15 -12   19.26    5.96
   1 -15 -12   17.79    7.96
  -1  15  12   15.83    5.12
   1 -15 -11   -3.69   13.81
   1 -15 -11    7.00    7.56
   1 -15 -11    2.44    4.12
  -1  15  11   -3.77    2.69
  -1  15  11   -5.79    4.48
   1 -15 -11   13.73    5.32
  -1  15  10  123.80    8.95
   1 -15 -10  140.97   11.09
   1 -15 -10  131.88    9.22
  -1  15  10  135.75    8.12
   1 -15 -10  134.85    8.83
   1  15 -10   95.07   14.08
   1 -15 -10  111.64   17.10
  -1  15   9  107.65    6.59
  -1  15   9   89.05    7.35
   1 -15  -9   87.86    9.32
   1  15  -9  111.15   12.70
   1 -15  -9   91.50   15.20
   1 -15  -9  103.35    7.32
   1 -15  -9  101.89    7.96
   1  15  -8   20.07   10.90
   1 -15  -8   23.53    4.26
  -1  15   8   22.10    4.50
   1 -15  -8   21.18    4.98
   1 -15  -8   32.91    7.00
   1 -15  -8    8.29   12.31
  -1  15   8   20.04    3.22
   1  15  -7   47.27    9.65
  -1  15   7   67.34   12.29
   1 -15  -7   45.07    7.65
  -1  15   7   48.35    3.08
  -1  15   7   47.80    4.90
   1 -15  -7   37.31    5.74
   1 -15  -6  721.08   42.78
  -1  15   6  740.44   41.44
   1  15  -6  746.40   43.80
  -1  15   6  747.76   41.78
  -1 -15   6  728.93   41.51
  -1  15   6  662.07   45.00
  -1  15   5   39.77    3.13
   1  15  -5   43.38    9.63
  -1  15   5   41.96    4.36
   1 -15  -5   46.25    4.51
   1 -15  -5   37.75    7.45
  -1  15   5   52.20   12.96
  -1 -15   5   50.13    3.31
  -1  15   4    0.08    3.43
  -1  15   4    3.50    1.94
   1 -15  -4    0.30    3.25
   1 -15  -4   -4.71    6.70
  -1  15   4   -7.73   11.60
  -1 -15   4    1.45    1.88
  -1  15   4    0.83    6.21
   1  15  -4   10.67    9.12
  -1 -15   3  131.77    7.80
  -1  15   3  128.05    8.31
   1 -15  -3  126.23   11.43
  -1  15   3  130.80   14.40
   1  15  -3  149.77   11.84
   1 -15  -3  132.34    8.20
  -1  15   3  141.44   10.08
  -1  15   2   -0.80    2.96
  -1 -15   2    4.01    2.03
   1 -15  -2    4.25    2.76
  -1  15   2    3.56    6.67
  -1 -15   2   -9.84    9.05
   1 -15  -2    3.83    7.56
   1  15  -2    6.60    7.94
  -1  15   2    7.88   11.69
  -1  15   1   -6.98   12.49
  -1 -15   1    2.02    8.14
  -1 -15   1   10.56    2.21
   1 -15  -1  -11.22    8.36
   1  15  -1   11.91    7.16
   1 -15  -1   13.91    2.91
  -1  15   1    8.71    6.97
  -1 -15   0 1974.74   95.78
   1  15   0 1644.63   95.72
  -1  15   0 1556.69   97.74
   1 -15   0 1602.28   97.03
  -1  15   0 1685.60   96.63
   1  15   0 1641.18   96.54
  -1 -15   0 1691.41   97.00
   1 -15   0 1580.74   95.74
  -1  15  -1  193.49   16.41
  -1  15  -1  190.37   12.97
   1 -15   1  152.51   14.42
  -1 -15  -1  174.91   13.60
   1  15   1  190.99   16.61
   1 -15   1  193.05   10.65
   1  15   1  168.71   10.62
   1  15   1  177.75   12.39
  -1  15  -2   16.38    7.66
   1  15   2    4.97   12.19
   1 -15   2   17.78    3.06
  -1 -15  -2   15.76    7.62
   1 -15   2   23.82    9.52
   1  15   2   14.75    2.91
   1  15   2   17.85    6.15
   1 -15   3  609.35   32.29
  -1  15  -3  565.66   32.00
  -1  15  -3  546.54   34.21
   1  15   3  531.45   32.31
   1 -15   3  613.48   35.08
   1  15   3  606.86   33.15
   1  15   3  521.80   35.85
  -1 -15  -3  588.24   33.69
   1 -15   4    7.06    2.65
   1  15   4    6.68    3.16
   1  15   4   14.14   13.13
  -1 -15  -4   -1.22    6.73
   1  15   4    6.37    5.81
  -1 -15  -5    6.29    6.63
   1  15   5   -1.24    3.37
  -1 -15  -6 1190.61   71.54
   1  15   6 1255.89   70.51
   1  15   6 1270.29   70.80
   1  15   7    1.48    3.80
  -1 -15  -7    4.24    4.43
  -1 -15  -7   -0.22    6.33
  -1 -15  -8  225.42   13.23
  -1 -15  -8  226.17   14.84
  -1 -15  -8  204.22   13.59
   1  15   8  237.70   13.49
  -1 -15  -9    3.52    3.50
  -1 -15  -9    4.23    6.96
   1  15   9    4.69    3.62
  -1 -15  -9    0.95    4.60
  -1 -15 -10  118.97    7.96
   1  15  10  124.81    8.34
  -1 -15 -10  118.91    8.65
   1  15  10  124.82   15.93
  -1 -15 -10  133.06   10.44
  -1 -15 -11   75.88    7.44
   1  15  11   96.44    7.04
   1  15  11   94.42   15.49
  -1 -15 -11   98.76    9.18
  -1 -15 -11   93.32   16.65
  -1 -15 -11   91.48    6.45
   1  15  12    1.67    2.64
   1  15  12    6.09    5.07
  -1 -15 -12   10.04   15.62
  -1 -15 -12    7.59    3.88
  -1 -15 -12    2.13    7.76
   1  15  12   12.30   12.95
   1  15  13   28.03    5.98
   1  15  13   54.01   13.94
   1  15  13   27.46    2.97
  -1 -15 -13   26.46    4.30
  -1 -15 -13   41.71   16.17
   1  15  14   61.34    4.35
  -1 -15 -14   67.19    5.71
   1  15  14   60.89    6.81
  -1 -15 -14   58.90   18.33
   1  15  15   11.66    6.35
   1  15  15    1.48   12.59
  -1 -15 -15    9.43    4.54
   1  15  15   12.79    2.24
  -1 -15 -16  124.98   21.00
  -1 -15 -16  135.98    9.47
   1  15  16  140.77   10.52
   1  15  16  162.54   16.84
  -1 -15 -17   -0.87   18.87
   1  15  17   18.30   13.16
   1  15  17    8.12    6.87
  -1 -15 -17    3.50    5.01
  -1 -15 -18  -23.26   20.40
   1  15  18   -1.31   13.23
   1  15  18   -1.86    7.33
  -1 -15 -18   -1.06    5.38
   1  15  19    1.45    7.87
  -1 -15 -19   -7.41   22.03
   1  15  19    5.98   13.47
   1  15  20   29.76   14.44
  -1 -15 -20    8.59   22.47
   1  15  21    8.86   13.88
  -1  15 -21    0.66    6.32
  -1 -15 -21   25.53   23.17
   1  15  22  180.66   17.26
  -1  15 -22  149.94   10.89
  -1 -15 -22  123.28   26.55
  -1  15 -23   15.86    6.35
   1  15  23    8.98   14.37
   1  15  24    6.15   14.87
  -1  15 -24   15.28    6.58
  -1 -15 -25   43.71   28.22
  -1  15 -25   65.59   12.46
  -1  15 -25   60.62    7.56
[truncated: 3,935,080 more chars]
