# Supplementary material for: Isolation of a triplet benzene dianion
Source: Springer Nature journal article supplement (doi:10.1038/s41557-021-00737-8), 2021-07-19
Supplement: 41557_2021_737_MOESM11_ESM.mol [file 41557_2021_737_MOESM11_ESM.mol]

nchem.20061446C-comp2-Y.mol
  ChemDraw05182122572D

162167  0  0  0  0  0  0  0  0999 V2000
    2.1381    1.6524    0.0000 C   0  0  0  0  0  0  0  0  0  0  0  0
    2.1381    0.8274    0.0000 C   0  0  0  0  0  0  0  0  0  0  0  0
    1.4236    0.4149    0.0000 O   0  0  0  0  0  0  0  0  0  0  0  0
    1.4236   -0.4101    0.0000 C   0  0  0  0  0  0  0  0  0  0  0  0
    0.7092   -0.8226    0.0000 C   0  0  0  0  0  0  0  0  0  0  0  0
   -0.0053   -0.4101    0.0000 O   0  0  0  0  0  0  0  0  0  0  0  0
   -0.7198   -0.8226    0.0000 C   0  0  0  0  0  0  0  0  0  0  0  0
   -1.4342   -0.4101    0.0000 C   0  0  0  0  0  0  0  0  0  0  0  0
   -1.4342    0.4149    0.0000 O   0  0  0  0  0  0  0  0  0  0  0  0
   -2.1487    0.8274    0.0000 C   0  0  0  0  0  0  0  0  0  0  0  0
   -2.1487    1.6524    0.0000 C   0  0  0  0  0  0  0  0  0  0  0  0
   -1.4342    2.0649    0.0000 O   0  0  0  0  0  0  0  0  0  0  0  0
   -1.4342    2.8899    0.0000 C   0  0  0  0  0  0  0  0  0  0  0  0
   -0.7198    3.3024    0.0000 C   0  0  0  0  0  0  0  0  0  0  0  0
   -0.0053    2.8899    0.0000 O   0  0  0  0  0  0  0  0  0  0  0  0
    0.7092    3.3024    0.0000 C   0  0  0  0  0  0  0  0  0  0  0  0
    1.4236    2.8899    0.0000 C   0  0  0  0  0  0  0  0  0  0  0  0
    1.4236    2.0649    0.0000 O   0  0  0  0  0  0  0  0  0  0  0  0
   -0.0673    1.2915    0.0000 K   0  3  0  0  0  0  0  0  0  0  0  0
    2.9193   -0.4973    0.0000 C   0  0  0  0  0  0  0  0  0  0  0  0
    3.7422   -0.4973    0.0000 C   0  0  0  0  0  0  0  0  0  0  0  0
    3.9945    0.2846    0.0000 C   0  0  0  0  0  0  0  0  0  0  0  0
    3.3253    0.7671    0.0000 O   0  0  0  0  0  0  0  0  0  0  0  0
    2.6559    0.2846    0.0000 C   0  0  0  0  0  0  0  0  0  0  0  0
    2.6559    2.0987    0.0000 C   0  0  0  0  0  0  0  0  0  0  0  0
    3.3253    1.6162    0.0000 O   0  0  0  0  0  0  0  0  0  0  0  0
    3.9945    2.0987    0.0000 C   0  0  0  0  0  0  0  0  0  0  0  0
    3.7422    2.8806    0.0000 C   0  0  0  0  0  0  0  0  0  0  0  0
    2.9193    2.8806    0.0000 C   0  0  0  0  0  0  0  0  0  0  0  0
    9.5138    1.6524    0.0000 C   0  0  0  0  0  0  0  0  0  0  0  0
    9.5138    0.8274    0.0000 C   0  0  0  0  0  0  0  0  0  0  0  0
    8.7993    0.4149    0.0000 O   0  0  0  0  0  0  0  0  0  0  0  0
    8.7993   -0.4101    0.0000 C   0  0  0  0  0  0  0  0  0  0  0  0
    8.0849   -0.8226    0.0000 C   0  0  0  0  0  0  0  0  0  0  0  0
    7.3704   -0.4101    0.0000 O   0  0  0  0  0  0  0  0  0  0  0  0
    6.6559   -0.8226    0.0000 C   0  0  0  0  0  0  0  0  0  0  0  0
    5.9415   -0.4101    0.0000 C   0  0  0  0  0  0  0  0  0  0  0  0
    5.9415    0.4149    0.0000 O   0  0  0  0  0  0  0  0  0  0  0  0
    5.2270    0.8274    0.0000 C   0  0  0  0  0  0  0  0  0  0  0  0
    5.2270    1.6524    0.0000 C   0  0  0  0  0  0  0  0  0  0  0  0
    5.9415    2.0649    0.0000 O   0  0  0  0  0  0  0  0  0  0  0  0
    5.9415    2.8899    0.0000 C   0  0  0  0  0  0  0  0  0  0  0  0
    6.6559    3.3024    0.0000 C   0  0  0  0  0  0  0  0  0  0  0  0
    7.3704    2.8899    0.0000 O   0  0  0  0  0  0  0  0  0  0  0  0
    8.0849    3.3024    0.0000 C   0  0  0  0  0  0  0  0  0  0  0  0
    8.7993    2.8899    0.0000 C   0  0  0  0  0  0  0  0  0  0  0  0
    8.7993    2.0649    0.0000 O   0  0  0  0  0  0  0  0  0  0  0  0
    7.3084    1.2915    0.0000 K   0  3  0  0  0  0  0  0  0  0  0  0
   10.2950   -0.4973    0.0000 C   0  0  0  0  0  0  0  0  0  0  0  0
   11.1178   -0.4973    0.0000 C   0  0  0  0  0  0  0  0  0  0  0  0
   11.3702    0.2846    0.0000 C   0  0  0  0  0  0  0  0  0  0  0  0
   10.7010    0.7671    0.0000 O   0  0  0  0  0  0  0  0  0  0  0  0
   10.0316    0.2846    0.0000 C   0  0  0  0  0  0  0  0  0  0  0  0
   10.0316    2.0987    0.0000 C   0  0  0  0  0  0  0  0  0  0  0  0
   10.7010    1.6162    0.0000 O   0  0  0  0  0  0  0  0  0  0  0  0
   11.3702    2.0987    0.0000 C   0  0  0  0  0  0  0  0  0  0  0  0
   11.1178    2.8806    0.0000 C   0  0  0  0  0  0  0  0  0  0  0  0
   10.2950    2.8806    0.0000 C   0  0  0  0  0  0  0  0  0  0  0  0
   -9.1341   -2.3521    0.0000 C   0  0  0  0  0  0  0  0  0  0  0  0
   -8.8595    1.4549    0.0000 C   0  0  0  0  0  0  0  0  0  0  0  0
   -8.5886    1.9133    0.0000 C   0  0  0  0  0  0  0  0  0  0  0  0
   -9.0294    0.1749    0.0000 C   0  0  0  0  0  0  0  0  0  0  0  0
   -9.0223   -0.7073    0.0000 C   0  0  0  0  0  0  0  0  0  0  0  0
   -8.7416    0.6831    0.0000 C   0  0  0  0  0  0  0  0  0  0  0  0
   -9.7679    0.4352    0.0000 C   0  0  0  0  0  0  0  0  0  0  0  0
   -9.5114    1.6821    0.0000 C   0  0  0  0  0  0  0  0  0  0  0  0
   -9.8282    1.0984    0.0000 C   0  0  0  0  0  0  0  0  0  0  0  0
   -7.0729    0.4227    0.0000 C   0  5  0  0  0  0  0  0  0  0  0  0
   -7.9617    0.4227    0.0000 C   0  0  0  0  0  0  0  0  0  0  0  0
   -8.3742    0.1604    0.0000 C   0  0  0  0  0  0  0  0  0  0  0  0
   -6.6604    0.1604    0.0000 C   0  0  0  0  0  0  0  0  0  0  0  0
   -5.8737    0.1604    0.0000 C   0  0  0  0  0  0  0  0  0  0  0  0
   -5.4612   -0.5541    0.0000 C   0  0  0  0  0  0  0  0  0  0  0  0
   -4.6362   -0.5541    0.0000 C   0  0  0  0  0  0  0  0  0  0  0  0
   -4.2237    0.1604    0.0000 C   0  0  0  0  0  0  0  0  0  0  0  0
   -4.6362    0.8749    0.0000 C   0  0  0  0  0  0  0  0  0  0  0  0
   -5.4612    0.8749    0.0000 C   0  0  0  0  0  0  0  0  0  0  0  0
   -5.8737    1.5331    0.0000 C   0  0  0  0  0  0  0  0  0  0  0  0
   -5.7128   -1.1391    0.0000 C   0  0  0  0  0  0  0  0  0  0  0  0
   -6.6604    1.5331    0.0000 N   0  5  0  0  0  0  0  0  0  0  0  0
   -6.6604   -1.2123    0.0000 N   0  5  0  0  0  0  0  0  0  0  0  0
   -7.8494    1.7844    0.0000 N   0  5  0  0  0  0  0  0  0  0  0  0
   -8.4757    1.3115    0.0000 N   0  5  0  0  0  0  0  0  0  0  0  0
   -8.0101   -1.4436    0.0000 N   0  5  0  0  0  0  0  0  0  0  0  0
   -8.2848   -0.9573    0.0000 N   0  5  0  0  0  0  0  0  0  0  0  0
   -8.7037   -0.5262    0.0000 C   0  0  0  0  0  0  0  0  0  0  0  0
   -3.3987    0.1604    0.0000 C   0  0  0  0  0  0  0  0  0  0  0  0
   -2.5737    0.1604    0.0000 C   0  0  0  0  0  0  0  0  0  0  0  0
   -2.9862   -0.5541    0.0000 C   0  0  0  0  0  0  0  0  0  0  0  0
   -2.9862    0.8749    0.0000 C   0  0  0  0  0  0  0  0  0  0  0  0
   -9.2498   -0.0256    0.0000 C   0  0  0  0  0  0  0  0  0  0  0  0
   -8.8854   -1.3147    0.0000 C   0  0  0  0  0  0  0  0  0  0  0  0
   -9.8342   -0.3392    0.0000 C   0  0  0  0  0  0  0  0  0  0  0  0
   -9.4198   -1.6407    0.0000 C   0  0  0  0  0  0  0  0  0  0  0  0
   -9.9342   -1.1532    0.0000 C   0  0  0  0  0  0  0  0  0  0  0  0
   -8.5594   -1.7740    0.0000 C   0  0  0  0  0  0  0  0  0  0  0  0
   -9.1612    0.8087    0.0000 C   0  0  0  0  0  0  0  0  0  0  0  0
  -10.6237   -1.4907    0.0000 C   0  0  0  0  0  0  0  0  0  0  0  0
  -11.3702   -1.8420    0.0000 C   0  0  0  0  0  0  0  0  0  0  0  0
  -10.6927   -2.3128    0.0000 C   0  0  0  0  0  0  0  0  0  0  0  0
  -11.3012   -1.0199    0.0000 C   0  0  0  0  0  0  0  0  0  0  0  0
  -10.3626    1.2744    0.0000 C   0  0  0  0  0  0  0  0  0  0  0  0
  -10.5012    1.8838    0.0000 C   0  0  0  0  0  0  0  0  0  0  0  0
  -10.7460    0.8660    0.0000 C   0  0  0  0  0  0  0  0  0  0  0  0
  -10.9595    1.4254    0.0000 C   0  0  0  0  0  0  0  0  0  0  0  0
   -7.9617   -0.1147    0.0000 C   0  0  0  0  0  0  0  0  0  0  0  0
   -7.0729   -0.1147    0.0000 C   0  5  0  0  0  0  0  0  0  0  0  0
   -9.9591   -2.3433    0.0000 C   0  0  0  0  0  0  0  0  0  0  0  0
  -10.3792   -3.0533    0.0000 C   0  0  0  0  0  0  0  0  0  0  0  0
   -9.9744   -3.7722    0.0000 C   0  0  0  0  0  0  0  0  0  0  0  0
   -9.1494   -3.7810    0.0000 C   0  0  0  0  0  0  0  0  0  0  0  0
   -8.7293   -3.0710    0.0000 C   0  0  0  0  0  0  0  0  0  0  0  0
   -7.9043   -3.0798    0.0000 C   0  0  0  0  0  0  0  0  0  0  0  0
  -10.3639   -1.6244    0.0000 C   0  0  0  0  0  0  0  0  0  0  0  0
  -10.3945   -4.4822    0.0000 C   0  0  0  0  0  0  0  0  0  0  0  0
   -7.3725   -2.9800    0.0000 C   0  0  0  0  0  0  0  0  0  0  0  0
   -7.9456   -3.5734    0.0000 C   0  0  0  0  0  0  0  0  0  0  0  0
   -7.7183   -4.3664    0.0000 C   0  0  0  0  0  0  0  0  0  0  0  0
   -6.9178   -4.5661    0.0000 C   0  0  0  0  0  0  0  0  0  0  0  0
   -6.3447   -3.9726    0.0000 C   0  0  0  0  0  0  0  0  0  0  0  0
   -6.5720   -3.1796    0.0000 C   0  0  0  0  0  0  0  0  0  0  0  0
   -5.9989   -2.5862    0.0000 C   0  0  0  0  0  0  0  0  0  0  0  0
   -8.7461   -3.3737    0.0000 C   0  0  0  0  0  0  0  0  0  0  0  0
   -6.6904   -5.3591    0.0000 C   0  0  0  0  0  0  0  0  0  0  0  0
   -4.1894   -2.1786    0.0000 C   0  0  0  0  0  0  0  0  0  0  0  0
   -4.8763   -1.7216    0.0000 C   0  0  0  0  0  0  0  0  0  0  0  0
   -5.6155   -2.0879    0.0000 C   0  0  0  0  0  0  0  0  0  0  0  0
   -5.6678   -2.9112    0.0000 C   0  0  0  0  0  0  0  0  0  0  0  0
   -4.9810   -3.3682    0.0000 C   0  0  0  0  0  0  0  0  0  0  0  0
   -4.2418   -3.0019    0.0000 C   0  0  0  0  0  0  0  0  0  0  0  0
   -3.5549   -3.4589    0.0000 C   0  0  0  0  0  0  0  0  0  0  0  0
   -4.8239   -0.8982    0.0000 C   0  0  0  0  0  0  0  0  0  0  0  0
   -6.4071   -3.2775    0.0000 C   0  0  0  0  0  0  0  0  0  0  0  0
   -9.7070    3.9604    0.0000 C   0  0  0  0  0  0  0  0  0  0  0  0
  -10.5281    3.8805    0.0000 C   0  0  0  0  0  0  0  0  0  0  0  0
  -10.8694    3.1294    0.0000 C   0  0  0  0  0  0  0  0  0  0  0  0
  -10.3896    2.4583    0.0000 C   0  0  0  0  0  0  0  0  0  0  0  0
   -9.5685    2.5382    0.0000 C   0  0  0  0  0  0  0  0  0  0  0  0
   -9.2272    3.2893    0.0000 C   0  0  0  0  0  0  0  0  0  0  0  0
   -8.4060    3.3692    0.0000 C   0  0  0  0  0  0  0  0  0  0  0  0
  -11.0079    4.5516    0.0000 C   0  0  0  0  0  0  0  0  0  0  0  0
  -10.7309    1.7072    0.0000 C   0  0  0  0  0  0  0  0  0  0  0  0
   -6.3176    3.9443    0.0000 C   0  0  0  0  0  0  0  0  0  0  0  0
   -6.8264    4.5938    0.0000 C   0  0  0  0  0  0  0  0  0  0  0  0
   -7.6432    4.4779    0.0000 C   0  0  0  0  0  0  0  0  0  0  0  0
   -7.9513    3.7126    0.0000 C   0  0  0  0  0  0  0  0  0  0  0  0
   -7.4425    3.0632    0.0000 C   0  0  0  0  0  0  0  0  0  0  0  0
   -6.6257    3.1790    0.0000 C   0  0  0  0  0  0  0  0  0  0  0  0
   -6.1169    2.5296    0.0000 C   0  0  0  0  0  0  0  0  0  0  0  0
   -6.5183    5.3591    0.0000 C   0  0  0  0  0  0  0  0  0  0  0  0
   -8.7681    3.5967    0.0000 C   0  0  0  0  0  0  0  0  0  0  0  0
   -4.9504    3.6138    0.0000 C   0  0  0  0  0  0  0  0  0  0  0  0
   -5.6257    3.1400    0.0000 C   0  0  0  0  0  0  0  0  0  0  0  0
   -5.5530    2.3182    0.0000 C   0  0  0  0  0  0  0  0  0  0  0  0
   -4.8050    1.9703    0.0000 C   0  0  0  0  0  0  0  0  0  0  0  0
   -4.1296    2.4441    0.0000 C   0  0  0  0  0  0  0  0  0  0  0  0
   -4.2024    3.2659    0.0000 C   0  0  0  0  0  0  0  0  0  0  0  0
   -3.5270    3.7398    0.0000 C   0  0  0  0  0  0  0  0  0  0  0  0
   -6.3738    3.4879    0.0000 C   0  0  0  0  0  0  0  0  0  0  0  0
   -4.7323    1.1485    0.0000 C   0  0  0  0  0  0  0  0  0  0  0  0
   -7.5237   -0.7802    0.0000 Y   0  1  0  0  0  0  0  0  0  0  0  0
   -7.5237    1.0823    0.0000 Y   0  1  0  0  0  0  0  0  0  0  0  0
  1  2  1  0      
  2  3  1  0      
  3  4  1  0      
  4  5  1  0      
  5  6  1  0      
  6  7  1  0      
  7  8  1  0      
  8  9  1  0      
  9 10  1  0      
 10 11  1  0      
 11 12  1  0      
 12 13  1  0      
 13 14  1  0      
 14 15  1  0      
 15 16  1  0      
 16 17  1  0      
 17 18  1  0      
  1 18  1  0      
 20 21  1  0      
 21 22  1  0      
 22 23  1  0      
 23 24  1  0      
 20 24  1  0      
 29 25  1  0      
 26 25  1  0      
 27 26  1  0      
 28 27  1  0      
 29 28  1  0      
 30 31  1  0      
 31 32  1  0      
 32 33  1  0      
 33 34  1  0      
 34 35  1  0      
 35 36  1  0      
 36 37  1  0      
 37 38  1  0      
 38 39  1  0      
 39 40  1  0      
 40 41  1  0      
 41 42  1  0      
 42 43  1  0      
 43 44  1  0      
 44 45  1  0      
 45 46  1  0      
 46 47  1  0      
 30 47  1  0      
 49 50  1  0      
 50 51  1  0      
 51 52  1  0      
 52 53  1  0      
 49 53  1  0      
 58 54  1  0      
 55 54  1  0      
 56 55  1  0      
 57 56  1  0      
 58 57  1  0      
 59 85  1  0      
 60 61  1  0      
 85 63  1  0      
 63 62  1  0      
 62 65  2  0      
 64 62  1  0      
 64 60  2  0      
 60 66  1  0      
 66 67  2  0      
 69 70  2  0      
 71 68  2  0      
 71107  1  0      
 70106  1  0      
 71 72  1  0      
 72 73  1  0      
 73 74  2  0      
 74 75  1  0      
 75 76  2  0      
 76 77  1  0      
 77 72  2  0      
 77 78  1  0      
 73 79  1  0      
 78 80  1  0      
 79 81  1  0      
 69 64  1  0      
106 86  1  0      
 69 68  1  0      
 75 87  1  0      
 87 88  1  0      
 87 89  1  0      
 87 90  1  0      
 86 91  2  0      
 92 86  1  0      
 91 93  1  0      
 92 94  2  0      
 94 95  1  0      
 95 93  2  0      
 92 96  1  0      
 96 84  1  0      
 91 97  1  0      
 97 83  1  0      
 67 65  1  0      
 95 98  1  0      
 98 99  1  0      
 98100  1  0      
 98101  1  0      
 67102  1  0      
102103  1  0      
102104  1  0      
102105  1  0      
 61 82  1  0      
106107  2  0      
 59108  2  0      
108109  1  0      
109110  2  0      
110111  1  0      
111112  2  0      
112 59  1  0      
112113  1  0      
108114  1  0      
110115  1  0      
116117  2  0      
117118  1  0      
118119  2  0      
119120  1  0      
120121  2  0      
121116  1  0      
121122  1  0      
117123  1  0      
119124  1  0      
116 84  1  0      
125126  2  0      
126127  1  0      
127128  2  0      
128129  1  0      
129130  2  0      
130125  1  0      
130131  1  0      
126132  1  0      
128133  1  0      
127 81  1  0      
134135  2  0      
135136  1  0      
136137  2  0      
137138  1  0      
138139  2  0      
139134  1  0      
139140  1  0      
135141  1  0      
137142  1  0      
138 83  1  0      
143144  2  0      
144145  1  0      
145146  2  0      
146147  1  0      
147148  2  0      
148143  1  0      
148149  1  0      
144150  1  0      
146151  1  0      
152153  2  0      
153154  1  0      
154155  2  0      
155156  1  0      
156157  2  0      
157152  1  0      
157158  1  0      
153159  1  0      
155160  1  0      
147 82  1  0      
154 80  1  0      
M  CHG  8  19   1  48   1  68  -1  80  -1  81  -1  82  -1  83  -1  84  -1
M  CHG  4  85  -1 107  -1 161   3 162   3
M  END
